# Supplementary material for: Bacterial–fungal interactions in the neonatal gut influence asthma outcomes later in life
Source: eLife. 2021 Apr 20;10:e67740. doi: 10.7554/eLife.67740 (PMC8075585; doi:10.7554/eLife.67740)
Supplement: Figure 2—figure supplement 1—source data 1. [file elife-67740-fig2-figsupp1-data1.xlsx]

## Sheet: Sheet1
Sample		Cells/ml	Total cells	Volume needed		Column buffer			1 million cells/well for stains=4 million/ml
		column B*25*2*10000							2 wells: HDM and not
Control spleen 1	23	11500000	57500000	0.434783		0.815217			500 000 cells in 500ul
Control spleen 2	24	12000000	60000000	0.416667		0.833333			1 million cells/ml
Control spleen 3	34	17000000	85000000	0.294118		0.955882			250ul per well of cells
Control spleen 4	33	16500000	82500000	0.30303		0.94697
FLVR spleen 1	32	16000000	80000000	0.3125		0.9375
FLVR spleen 2	27	13500000	67500000	0.37037		0.87963
FLVR spleen 3	35	17500000	87500000	0.285714		0.964286
FLVR spleen 4	41	20500000	102500000	0.243902		1.0061
FLVR spleen 5	39	19500000	97500000	0.25641		0.99359
Pichia spleen 1	30	15000000	75000000	0.333333		0.916667
Pichia spleen 2	31	15500000	77500000	0.322581		0.927419
Pichia spleen 3	31	15500000	77500000	0.322581		0.927419
Pichia spleen 4	35	17500000	87500000	0.285714		0.964286
Pichia spleen 5	36	18000000	90000000	0.277778		0.972222
Pichia+FLVR spleen 1	31	15500000	77500000	0.322581		0.927419
Pichia+FLVR spleen 2	29	14500000	72500000	0.344828		0.905172
Pichia+FLVR spleen 3	32	16000000	80000000	0.3125		0.9375
Pichia+FLVR spleen 4	28	14000000	70000000	0.357143		0.892857
Control lung 1	42	21000000	21000000	0.238095		1.0119
Control lung 2	30	15000000	15000000	0.333333		0.916667
Control lung 3	31	15500000	15500000	0.322581		0.927419
Control lung 4	33	16500000	16500000	0.30303		0.94697
FLVR lung 1	41	20500000	20500000	0.243902		1.0061
FLVR lung 2	45	22500000	22500000	0.222222		1.02778
FLVR lung 3	45	22500000	22500000	0.222222		1.02778
FLVR lung 4	42	21000000	21000000	0.238095		1.0119
FLVR lung 5	43	21500000	21500000	0.232558		1.01744
Pichia lung 1	48	24000000	24000000	0.208333		1.04167
Pichia lung 2	29	14500000	14500000	0.344828		0.905172
Pichia lung 3	32	16000000	16000000	0.3125		0.9375
Pichia lung 4	26	13000000	13000000	0.384615		0.865385
Pichia lung 5	33	16500000	16500000	0.30303		0.94697
Pichia+FLVR lung 1	60	30000000	30000000	0.166667		1.08333
Pichia+FLVR lung 2	29	14500000	14500000	0.344828		0.905172
Pichia+FLVR lung 3	20	10000000	10000000	0.5		0.75
Pichia+FLVR lung 4	22	11000000	11000000	0.454545		0.795455

## Sheet: Flow
			Myeloid:	Sample:	Cells | Freq. of Parent	Cells/Single Cells | Freq. of Parent	Cells/Single Cells/Myeloid | Freq. of Parent	Cells/Single Cells/Myeloid/Cd11b high | Freq. of Parent	Cells/Single Cells/Myeloid/Cd11b high/Eosinophils | Freq. of Parent	Cells/Single Cells/Myeloid/Cd11b low | Freq. of Parent	Cells/Single Cells/Myeloid/Cd11b low/Lung macrophages | Freq. of Parent	Cells/Single Cells/Myeloid/Cdllb pos | Freq. of Parent	Cells/Single Cells/Myeloid/Cdllb pos/Neutrophils | Freq. of Parent	Cells/Single Cells/Myeloid/Dc11b neg | Freq. of Parent	Cells/Single Cells/Myeloid/Dc11b neg/Cdllc neg DC | Freq. of Parent	Cells/Single Cells/Myeloid/Dc11b neg/Cdllc pos DC | Freq. of Parent					Cells | Freq. of Parent	Cells/Single Cells | Freq. of Parent	Cells/Single Cells/Myeloid | Freq. of Parent	Cells/Single Cells/Myeloid/Cd11b high | Freq. of Parent	Cells/Single Cells/Myeloid/Cd11b high/Eosinophils | Freq. of Parent
Control lung 1	21000000			Lung_Myeloid_CTRL_001.fcs	56.9	95.4	44.4	42.5	46.4	9.09	19.6	54	26.4	41	65.5	4.63					11949000	11399346	5.06131e+06	2.15106e+06	998090
Control lung 2	15000000			Lung_Myeloid_CTRL_002.fcs	48.2	93.4	32.2	30.4	16.8	9.97	22.8	42	40.1	49.5	62.8	6.17					7230000	6752820	2.17441e+06	661020	111051
Control lung 3	15500000			Lung_Myeloid_CTRL_003.fcs	54.1	95.7	37.1	28.6	51.4	8.51	20.7	39.2	17	52.4	65.8	4.69					8385500	8.02492e+06	2.97725e+06	851493	437667
Control lung 4	16500000			Lung_Myeloid_CTRL_004.fcs	53.4	95.5	28.8	23.8	30.2	11.3	23.9	37.3	23.3	54.8	62.9	6.67					8811000	8414505	2.42338e+06	576764	174183
Pichia lung 1	24000000			Lung_Myeloid_Pichia_001.fcs	64.5	96.4	42.5	43.9	5.34	9.23	26.3	54.9	62	41	61.7	5.7					15480000	14922720	6342156	2.78421e+06	148677
Pichia lung 2	14500000			Lung_Myeloid_Pichia_002.fcs	61.3	95	43.3	30.6	17.6	11.4	23.5	43.8	41.3	50.2	62.3	4.99					8888500	8444075	3.65628e+06	1.11882e+06	196913
Pichia lung 3	16000000			Lung_Myeloid_Pichia_003.fcs	62.7	95.9	29.5	48	4.54	9.72	25.8	59.5	67.6	36.3	63.2	6.08					10032000	9620688	2.8381e+06	1.36229e+06	61847.9
Pichia lung 4	13000000			Lung_Myeloid_Pichia_004.fcs	67.9	96.6	42.7	27.7	59.2	9.37	13.7	39.2	11.1	52.3	68.4	2.66					8.827e+06	8.52688e+06	3.64098e+06	1.00855e+06	597062
Pichia lung 5	16500000			Lung_Myeloid_Pichia_005.fcs	64.8	96.4	38.5	24.8	38.2	9.83	19.6	36.6	19.6	55.4	67.3	2.85					10692000	1.03071e+07	3.96823e+06	984121	375934
			ICOS:	Sample:	Lymphocytes | Freq. of Parent	Lymphocytes/Lin+CD4+ | Freq. of Parent	Lymphocytes/Lin+CD4+/ICOS+ | Freq. of Parent				Restim:	Sample:	Lymphocytes | Freq. of Parent	Lymphocytes/CD3+CD4+ | Freq. of Parent	Lymphocytes/CD3+CD4+/IL-4+ | Freq. of Parent	Lymphocytes/CD3+CD4+/IL-17+ | Freq. of Parent
				Lung_ILC2_CTRL_001.fcs	15.5	8.68	9.07					Lung_intraTcell_CTRL_001.fcs	20.7	12.9	0.075	13.4
				Lung_ILC2_CTRL_002.fcs	18.6	8.98	5.85					Lung_intraTcell_CTRL_002.fcs	21.1	12.9	0.15	20.7
				Lung_ILC2_CTRL_003.fcs	15	9.81	6.47					Lung_intraTcell_CTRL_003.fcs	19.8	14	0.11	12
				Lung_ILC2_CTRL_004.fcs	14.4	7.83	3.86					Lung_intraTcell_CTRL_004.fcs	19.9	13.2	0.076	20.6
				Lung_ILC2_Pichia_001.fcs	17.8	11.3	2.41					Lung_intraTcell_Pichia_001.fcs	19	14.2	0.037	15.9
				Lung_ILC2_Pichia_002.fcs	17.7	11.1	5.67					Lung_intraTcell_Pichia_002.fcs	20.4	12.3	0.04	11.7
				Lung_ILC2_Pichia_003.fcs	11.9	8.26	2.13					Lung_intraTcell_Pichia_003.fcs	18.3	12.1	0	12.7
				Lung_ILC2_Pichia_004.fcs	19.1	11.6	9.52					Lung_intraTcell_Pichia_004.fcs	20.9	11.8	0.041	12.5
				Lung_ILC2_Pichia_005.fcs	19	12.3	4.52					Lung_intraTcell_Pichia_005.fcs	19.7	11.8	0.086	18
												Lung_intraTcell_fmo_IFNg.fcs	22.7	12.5	0	10.8
												Lung_intraTcell_fmo_IL4.fcs	23.1	13.3	0	15.5
												Lung_intraTcell_fmo_IL17.fcs	22.3	12.5	0.036	0
