# Supplementary material for: Bacterial–fungal interactions in the neonatal gut influence asthma outcomes later in life
Source: eLife. 2021 Apr 20;10:e67740. doi: 10.7554/eLife.67740 (PMC8075585; doi:10.7554/eLife.67740)
Supplement: Figure 2—figure supplement 1—source data 2. [file elife-67740-fig2-figsupp1-data2.xlsx]

## Sheet: Sheet1
*Note that this was part of a larger experiment that included mice in other treatment conditions, but AAD was induced at the same time and the scoring was therefore done together
			Perivascular infiltration (Max 5)	Peribronchial infiltration (Max 5)	Parenchymal infiltration (Max 5)	Epithelium Damage (Max 5)	Total
		1	2	3	2	3	10	C2
		2	3	4	3	4	14
		3	3	4	3	3	13
		4	2	2	2	2	8
		5	2	3	2	2	9
		6	3	4	3	5	15	P3
		7	3	4	3	4	14	P2
		8	3	5	3	5	16	P4
		9	3	3	3	3	12
		10	3	4	3	3	13
		11	2	3	3	5	13	P1
		12	2	2	2	1	7	C3
		13	4	4	4	5	17
		14	4	5	4	5	18	C4
		15	3	2	3	2	10	C1
		16	3	4	3	5	15	P5
		17	3	2	3	2	10
		18	4	5	3	4	16
