# Supplementary material for: Bacterial–fungal interactions in the neonatal gut influence asthma outcomes later in life
Source: eLife. 2021 Apr 20;10:e67740. doi: 10.7554/eLife.67740 (PMC8075585; doi:10.7554/eLife.67740)
Supplement: Figure 2—source data 1. [file elife-67740-fig2-data1.xlsx]

## Sheet: Postnatal 1
		Cell count (from hemocytometer)	Cells/ml	Total cells		Sample:	Cells | Freq. of Parent	Cells/Single Cells | Freq. of Parent	Cells/Single Cells/CD45+CDllbhigh | Freq. of Parent	Cells/Single Cells/CD45+CDllbhigh/SinglecF+ | Freq. of Parent	Cells | Freq. of Parent	Cells/Single Cells | Freq. of Parent	Cells/Single Cells/CD45+CDllbhigh | Freq. of Parent	Cells/Single Cells/CD45+CDllbhigh/SinglecF+ | Freq. of Parent						T cell diff	Sample:	Lymphocytes | Freq. of Parent	Lymphocytes/CD3+CD4+ | Freq. of Parent	Lymphocytes/CD3+CD4+/ICOS+ | Freq. of Parent	Lymphocytes/CD3+CD4+/RORgThigh | Freq. of Parent	Lymphocytes | Freq. of Parent	Lymphocytes/CD3+CD4+ | Freq. of Parent	Lymphocytes/CD3+CD4+/ICOS+ | Freq. of Parent	Lymphocytes/CD3+CD4+/RORgThigh | Freq. of Parent
			column B*25*2*10000		Myeloid:	Lung_Myeloid_PCTRL_001.fcs	52.9	93.1	13.7	17.8	17192500	1.60062e+07	2.19285e+06	390328							Lung_ILC_PCTRL_001.fcs	27.3	8.78	8.71	5.88	8872500	779006	67851.4	45805.5
Lung	PCTRL 1	65	32500000	32500000		Lung_Myeloid_PCTRL_002.fcs	41.5	92.3	15.5	22	11412500	1.05337e+07	1.63273e+06	359200							Lung_ILC_PCTRL_002.fcs	23.1	7.62	5.96	4.59	6352500	484060	28850	22218.4
	PCTRL 2	55	27500000	27500000		Lung_Myeloid_PCTRL_003.fcs	43.2	91.6	12.3	36.1	9.72e+06	8.90352e+06	1.09513e+06	395343							Lung_ILC_PCTRL_003.fcs	21.9	11.4	11.2	7.32	4.9275e+06	561735	62914.3	41119
	PCTRL 3	45	22500000	22500000		Lung_Myeloid_PCTRL_004.fcs	39.9	91.4	10.4	19.3	11970000	10940580	1.13782e+06	219599							Lung_ILC_PCTRL_004.fcs	24.1	10.7	13.7	8.55	7230000	773610	105985	66143.7
	PCTRL 4	60	30000000	30000000		Lung_Myeloid_Pichia_001.fcs	43	91.5	11.3	20.2	10965000	10032975	1.13373e+06	229013							Lung_ILC_Pichia_001.fcs	20.4	10.2	21.8	12.9	5.202e+06	530604	115672	68447.9
	Pichia 1	51	25500000	25500000		Lung_Myeloid_Pichia_002.fcs	45.6	92.2	24	60.6	13452000	12402744	2.97666e+06	1.80386e+06							Lung_ILC_Pichia_002.fcs	20.5	10.3	20.8	12.8	6047500	622893	129562	79730.2
	Pichia 2	59	29500000	29500000		Lung_Myeloid_Pichia_003.fcs	43.9	91.2	17.2	56.1	13609000	12411408	2.13476e+06	1.1976e+06							Lung_ILC_Pichia_003.fcs	21.2	11.9	21.3	13.8	6572000	782068	166580	107925
	Pichia 3	62	31000000	31000000		Lung_Myeloid_Pichia_004.fcs	46.6	91.6	22.1	62.3	13048000	11951968	2.64138e+06	1.64558e+06							Lung_ILC_Pichia_004.fcs	22.7	11.8	20	12.5	6356000	750008	150002	93751
	Pichia 4	56	28000000	28000000
				0.882686																	Sample:	Lymphocytes | Freq. of Parent	Lymphocytes/CD3+CD4+ | Freq. of Parent	Lymphocytes/CD3+CD4+/IL-4+ | Freq. of Parent	Lymphocytes/CD3+CD4+/IL-17+ | Freq. of Parent	Lymphocytes | Freq. of Parent	Lymphocytes/CD3+CD4+ | Freq. of Parent	Lymphocytes/CD3+CD4+/IL-4+ | Freq. of Parent	Lymphocytes/CD3+CD4+/IL-17+ | Freq. of Parent
																					Lung_Restim_PCTRL_001.fcs	14.4	16.2	0.47	0.21	4680000	758160	3563.35	1592.14
																					Lung_Restim_PCTRL_002.fcs	12.4	14.4	0.79	0.17	3410000	491040	3879.22	834.768
																					Lung_Restim_PCTRL_003.fcs	13.2	15.9	0.88	0.9	2970000	472230	4155.62	4250.07
																				T cell restim	Lung_Restim_PCTRL_004.fcs	15.8	16.7	0.28	0.28	4740000	791580	2216.42	2216.42
																					Lung_Restim_Pichia_001.fcs	15.6	12.8	0.78	0.18	3978000	509184	3971.64	916.531
																					Lung_Restim_Pichia_002.fcs	12.8	16.4	1.15	1.31	3776000	619264	7121.54	8112.36
																					Lung_Restim_Pichia_003.fcs	14.1	15.7	0.93	0.84	4371000	686247	6382.1	5764.47
																					Lung_Restim_Pichia_004.fcs	12.7	18	0.57	1.45	3556000	640080	3648.46	9281.16

## Sheet: 2018-1
Sample	Count	Cells/ml	Total cells	Eosinophils	Sample:	Cells | Freq. of Parent	Cells/Single Cells | Freq. of Parent	Cells/Single Cells/CD45+CD11bhigh | Freq. of Parent	Cells/Single Cells/CD45+CD11bhigh/SinglecF+ | Freq. of Parent	Cells | Freq. of Parent	Cells/Single Cells | Freq. of Parent	Cells/Single Cells/CD45+CD11bhigh | Freq. of Parent	Cells/Single Cells/CD45+CD11bhigh/SinglecF+ | Freq. of Parent			Sample:	Lymphocytes | Freq. of Parent	Lymphocytes/CD3+CD4+ | Freq. of Parent	Lymphocytes/CD3+CD4+/GATA3+ | Freq. of Parent	Lymphocytes/CD3+CD4+/ICOS+ | Freq. of Parent	Lymphocytes/CD3+CD4+/RORyThigh | Freq. of Parent	Lymphocytes | Freq. of Parent	Lymphocytes/CD3+CD4+ | Freq. of Parent	GATA	ICOS	RORyT
		column B*25*2*10000			Lung_Eosinophils_CTRL_001.fcs	48.6	96.8	17	7.44	13365000	12937320	2.19934e+06	163631			Lung_Tcelldiff_CTRL_001.fcs	14.5	9.24	5.74	13.5	2.16	3987500	368445	21148.7	49740.1	7958.41
Control lung 1	55	27500000	27500000		Lung_Eosinophils_CTRL_002.fcs	44.5	96.5	12	23.3	13350000	12882750	1545930	360202			Lung_Tcelldiff_CTRL_002.fcs	13	8.88	5.67	19.6	1.95	3900000	346320	19636.3	67878.7	6753.24
Control lung 2	60	30000000	30000000		Lung_Eosinophils_CTRL_003.fcs	43	96.3	18.6	8.77	10965000	10559295	1.96403e+06	172245			Lung_Tcelldiff_CTRL_003.fcs	12.3	8.93	5.27	8.77	2.41	3136500	280089	14760.7	24563.8	6750.16
Control lung 3	51	25500000	25500000		Lung_Eosinophils_CTRL_004.fcs	35.6	95	8.3	18	8010000	7609500	631589	113686			Lung_Tcelldiff_CTRL_004.fcs	11	10.8	4.84	12.9	2.73	2475000	267300	12937.3	34481.7	7297.29
Control lung 4	45	22500000	22500000		Lung_Eosinophils_CTRL_005.fcs	43.5	96.2	13.2	34.7	11527500	11089455	1.46381e+06	507941			Lung_Tcelldiff_CTRL_005.fcs	16.1	9.44	5.9	17.8	3.63	4.2665e+06	402758	23762.7	71690.9	14620.1
Control lung 5	53	26500000	26500000		Lung_Eosinophils_CTRL_006.fcs	37.6	95.1	10.5	19.9	6956000	6615156	694591	138224			Lung_Tcelldiff_CTRL_006.fcs	14.1	9.05	5.41	11.4	1.88	2608500	236069	12771.3	26911.9	4438.1
Control lung 6	37	18500000	18500000		Lung_Eosinophils_CTRL_007.fcs	46	96.6	10.5	20	12420000	11997720	1.25976e+06	251952			Lung_Tcelldiff_CTRL_007.fcs	16.4	8.88	4.71	11.7	2.23	4.428e+06	393206	18520	46005.1	8768.5
Control lung 7	54	27000000	27000000		Lung_Eosinophils_Pichia_001.fcs	44.7	97.2	8.79	29.8	18327000	17813844	1.56584e+06	466619			Lung_Tcelldiff_Pichia_001.fcs	15.8	9.43	6.91	16	2.35	6478000	610875	42211.5	97740.1	14355.6
Pichia lung 1	82	41000000	41000000		Lung_Eosinophils_Pichia_002.fcs	47.2	97.1	24.3	70.7	22656000	21998976	5.34575e+06	3.77945e+06			Lung_Tcelldiff_Pichia_002.fcs	12.6	9.71	6.01	25	4.79	6048000	587261	35294.4	146815	28129.8
Pichia lung 2	96	48000000	48000000		Lung_Eosinophils_Pichia_003.fcs	38.9	96.1	14.7	40.5	11086500	1.06541e+07	1.56616e+06	634293			Lung_Tcelldiff_Pichia_003.fcs	14.4	10.6	4.24	17.9	3.85	4104000	435024	18445	77869.3	16748.4
Pichia lung 3	57	28500000	28500000		Lung_Eosinophils_Pichia_004.fcs	42.6	96.5	10.3	19.1	15762000	15210330	1.56666e+06	299233			Lung_Tcelldiff_Pichia_004.fcs	17.2	10.3	4.47	12.6	3.03	6364000	655492	29300.5	82592	19861.4
Pichia lung 4	74	37000000	37000000		Lung_Eosinophils_Pichia_005.fcs	42.3	97.1	18.8	70.6	1.0152e+07	9.85759e+06	1.85323e+06	1.30838e+06			Lung_Tcelldiff_Pichia_005.fcs	17.6	10.3	4.07	16.7	5.07	4.224e+06	435072	17707.4	72657	22058.2
Pichia lung 5	48	24000000	24000000
					Sample:	Cells | Freq. of Parent	Cells/Single Cells | Freq. of Parent	Cells/Single Cells/CD45+CD11bpos_new | Freq. of Parent	Cells/Single Cells/CD45+CD11bpos_new/GR1+ | Freq. of Parent
					Lung_Eosinophils_CTRL_001.fcs	48.6	96.8	22.3	39.8	13365000	12937320	2.88502e+06	1.14824e+06
					Lung_Eosinophils_CTRL_002.fcs	44.5	96.5	17.3	35.7	13350000	12882750	2.22872e+06	795652
					Lung_Eosinophils_CTRL_003.fcs	43	96.3	24.8	46.2	10965000	10559295	2.61871e+06	1.20984e+06
					Lung_Eosinophils_CTRL_004.fcs	35.6	95	14.7	22.2	8010000	7609500	1.1186e+06	248328			Sample:	Lymphocytes | Freq. of Parent	Lymphocytes/CD3+CD4+ | Freq. of Parent	Lymphocytes/CD3+CD4+/IL-4+ | Freq. of Parent	Lymphocytes/CD3+CD4+/IL-17+ | Freq. of Parent	Lymphocytes | Freq. of Parent	Lymphocytes/CD3+CD4+ | Freq. of Parent	IL-4	IL-17
					Lung_Eosinophils_CTRL_005.fcs	43.5	96.2	19.3	22.8	11527500	11089455	2.14026e+06	487980			Lung_TcellRestim_CTRL_001.fcs	11.1	14.1	1.99	1.19	3052500	430402	8565.01	5121.79
					Lung_Eosinophils_CTRL_006.fcs	37.6	95.1	16.4	28.4	6956000	6615156	1.08489e+06	308108			Lung_TcellRestim_CTRL_002.fcs	13.4	16.5	1.92	1.06	4020000	663300	12735.4	7030.98
					Lung_Eosinophils_CTRL_007.fcs	46	96.6	15.2	34.7	12420000	11997720	1.82365e+06	632808			Lung_TcellRestim_CTRL_003.fcs	14.7	16.6	1.27	0.74	3748500	622251	7902.59	4604.66
					Lung_Eosinophils_Pichia_001.fcs	44.7	97.2	13	24.8	18327000	17813844	2.3158e+06	574318			Lung_TcellRestim_CTRL_004.fcs	12.9	14.1	1.02	0.83	2902500	409252	4174.38	3396.8
					Lung_Eosinophils_Pichia_002.fcs	47.2	97.1	29.9	11.9	22656000	21998976	6.57769e+06	782746			Lung_TcellRestim_CTRL_005.fcs	15.5	15.2	0.95	0.64	4107500	624340	5931.23	3995.78
					Lung_Eosinophils_Pichia_003.fcs	38.9	96.1	21.6	14.7	11086500	1.06541e+07	2.30129e+06	338290			Lung_TcellRestim_CTRL_006.fcs	15.4	14.5	0.81	0.67	2849000	413105	3346.15	2767.8
					Lung_Eosinophils_Pichia_004.fcs	42.6	96.5	16.2	26.9	15762000	15210330	2.46407e+06	662836			Lung_TcellRestim_CTRL_007.fcs	15.8	15.1	0.81	0.67	4266000	644166	5217.74	4315.91
					Lung_Eosinophils_Pichia_005.fcs	42.3	97.1	25.2	9.36	1.0152e+07	9.85759e+06	2.48411e+06	232513			Lung_TcellRestim_Pichia_001.fcs	15.7	14.4	2.26	1	6437000	926928	20948.6	9269.28
																Lung_TcellRestim_Pichia_002.fcs	13.2	20.7	4.19	3.29	6336000	1311552	54954	43150.1
																Lung_TcellRestim_Pichia_003.fcs	15.2	18.7	1.54	2.67	4332000	810084	12475.3	21629.2
																Lung_TcellRestim_Pichia_004.fcs	16.9	15.1	0.31	0.43	6253000	944203	2927.03	4060.07
																Lung_TcellRestim_Pichia_005.fcs	12.8	15.6	1.81	2.23	3072000	479232	8674.1	10686.9

## Sheet: 2018-3
Sample	Count	Cells/ml	Total cells	Eos	Sample:	Cells | Freq. of Parent	Cells/Single Cells | Freq. of Parent	Cells/Single Cells/CD45+CDllbhigh | Freq. of Parent	Cells/Single Cells/CD45+CDllbhigh/SinglecF+ | Freq. of Parent	Cells | Freq. of Parent	Cells/Single Cells | Freq. of Parent	Cells/Single Cells/CD45+CDllbhigh | Freq. of Parent	Cells/Single Cells/CD45+CDllbhigh/SinglecF+ | Freq. of Parent	Tcell	Sample:	Lymphocytes | Freq. of Parent	Lymphocytes/CD3+CD4+ | Freq. of Parent	Lymphocytes/CD3+CD4+/GATA3+ | Freq. of Parent	Lymphocytes/CD3+CD4+/ICOS+ | Freq. of Parent	Lymphocytes/CD3+CD4+/RORgThigh | Freq. of Parent	Lymphocytes | Freq. of Parent	Lymphocytes/CD3+CD4+ | Freq. of Parent	GATA	ICOS	RORyT
		column B*25*2*10000			Lung_Eosinophils_CTRL_001.fcs	47.2	96.4	21.2	15.7	18880000	18200320	3.85847e+06	605779		Lung_Tcelldiff_CTRL_001.fcs	18.3	6.2	4.68	15.1	2.69	7320000	453840	21239.7	68529.8	12208.3
Control lung 1	40	20000000	40000000		Lung_Eosinophils_CTRL_002.fcs	44.2	97.1	20.4	14.2	17680000	17167280	3.50213e+06	497302		Lung_Tcelldiff_CTRL_002.fcs	20.4	5.45	5.61	12.7	2.74	8160000	444720	24948.8	56479.4	12185.3
Control lung 2	40	20000000	40000000		Lung_Eosinophils_Pichia_001.fcs	49.9	97.6	34.2	56.3	24950000	24351200	8.32811e+06	4.68873e+06		Lung_Tcelldiff_Pichia_001.fcs	20.6	8.58	4.08	24.9	7.22	1.03e+07	883740	36056.6	220051	63806
Pichia lung 1	50	25000000	50000000		Lung_Eosinophils_Pichia_002.fcs	43.1	96.6	20.2	13.4	20688000	19984608	4.03689e+06	540943		Lung_Tcelldiff_Pichia_002.fcs	20.5	6.64	5.44	12.2	4.3	9840000	653376	35543.7	79711.9	28095.2
Pichia lung 2	48	24000000	48000000		Lung_Eosinophils_Pichia_003.fcs	47	96.7	19.6	14.3	20210000	19543070	3.83044e+06	547753		Lung_Tcelldiff_Pichia_003.fcs	25.3	6.46	4.65	11.5	3.15	10879000	702783	32679.4	80820.1	22137.7
Pichia lung 3	43	21500000	43000000		Lung_Eosinophils_Pichia_004.fcs	46.7	97.1	21.6	26.4	2.0081e+07	1.94987e+07	4.21171e+06	1.11189e+06		Lung_Tcelldiff_Pichia_004.fcs	25	7.07	4.72	16.3	7.55	10750000	760025	35873.2	123884	57381.9
Pichia lung 4	43	21500000	43000000		Lung_Eosinophils_Pichia_005.fcs	50.2	96.7	24.2	20.7	22088000	21359096	5.1689e+06	1.06996e+06		Lung_Tcelldiff_Pichia_005.fcs	24.8	6.5	5.25	17.7	4.6	10912000	709280	37237.2	125543	32626.9
Pichia lung 5	44	22000000	44000000		Lung_Eosinophils_Pichia_006.fcs	58.2	98	45.3	74.8	20370000	19962600	9.04306e+06	6.76421e+06		Lung_Tcelldiff_Pichia_006.fcs	20.5	11.8	4.24	26.3	4.39	7175000	846650	35898	222669	37167.9
Pichia lung 6	35	17500000	35000000		Lung_Eosinophils_Pichia_007.fcs	59.9	98.5	39.9	70.7	25757000	25370645	1.01229e+07	7.15688e+06		Lung_Tcelldiff_Pichia_007.fcs	24	10.2	4.01	31.9	7.48	10320000	1052640	42210.9	335792	78737.5
Pichia lung 7	43	21500000	43000000		Lung_Eosinophils_Pichia_008.fcs	61.9	98	43	70.5	38997000	38217060	1.64333e+07	1.15855e+07		Lung_Tcelldiff_Pichia_008.fcs	20.2	10.1	3.81	36.3	8.72	12726000	1285326	48970.9	466573	112080
Pichia lung 8	42	21000000	63000000
					Sample:	Cells | Freq. of Parent	Cells/Single Cells | Freq. of Parent	Cells/Single Cells/CD45+CD11b+ | Freq. of Parent	Cells/Single Cells/CD45+CD11b+/GR1+singelcF- | Freq. of Parent
					Lung_Eosinophils_CTRL_001.fcs	47.2	96.4	28.2	48.9	18880000	18200320	8.89996e+06	4.35208e+06
					Lung_Eosinophils_CTRL_002.fcs	44.2	97.1	27.7	47.4	17680000	17167280	8.13729e+06	3.85708e+06
					Lung_Eosinophils_Pichia_001.fcs	49.9	97.6	40.3	19.2	24950000	24351200	4.67543e+06	897683
					Lung_Eosinophils_Pichia_002.fcs	43.1	96.6	29.1	47.6	20688000	19984608	9.51267e+06	4.52803e+06
					Lung_Eosinophils_Pichia_003.fcs	47	96.7	28.1	45	20210000	19543070	8.79438e+06	3.95747e+06		Sample:	Lymphocytes | Freq. of Parent	Lymphocytes/CD3+CD4+ | Freq. of Parent	Lymphocytes/CD3+CD4+/IL-4+ | Freq. of Parent	Lymphocytes/CD3+CD4+/IL-17+ | Freq. of Parent	Lymphocytes | Freq. of Parent	Lymphocytes/CD3+CD4+ | Freq. of Parent	IL-4	IL-17
					Lung_Eosinophils_Pichia_004.fcs	46.7	97.1	29	37	2.0081e+07	1.94987e+07	7.2145e+06	2.66937e+06		Lung_TcellRestim_CTRL_001.fcs	14.8	7.23	1.31	3.13	5920000	428016	5607.01	13396.9
					Lung_Eosinophils_Pichia_005.fcs	50.2	96.7	33	44.8	22088000	21359096	9.56888e+06	4.28686e+06		Lung_TcellRestim_CTRL_002.fcs	15.8	7.03	0.36	0.95	6320000	444296	1599.47	4220.81
					Lung_Eosinophils_Pichia_006.fcs	58.2	98	50.9	8.08	20370000	19962600	1.61298e+06	130329	Stim	Lung_TcellRestim_Pichia_001.fcs	13.7	8.53	0.81	2.99	6850000	584305	4732.87	17470.7
					Lung_Eosinophils_Pichia_007.fcs	59.9	98.5	46.4	7.3	25757000	25370645	1.85206e+06	135200		Lung_TcellRestim_Pichia_002.fcs	15.4	8.31	0.7	1.56	7392000	614275	4299.93	9582.69
					Lung_Eosinophils_Pichia_008.fcs	61.9	98	49.5	8.63	38997000	38217060	3.29813e+06	284629		Lung_TcellRestim_Pichia_003.fcs	16.5	7.2	0.13	1.14	7095000	510840	664.092	5823.58
															Lung_TcellRestim_Pichia_004.fcs	17.1	7.97	0.44	3.07	7.353e+06	586034	2578.55	17991.2
															Lung_TcellRestim_Pichia_005.fcs	16.1	7.31	0.26	2.13	7.084e+06	517840	1346.39	11030
															Lung_TcellRestim_Pichia_006.fcs	13.4	10.2	0.59	3.33	4690000	478380	2822.44	15930.1
															Lung_TcellRestim_Pichia_007.fcs	15.4	8.16	1.31	5.53	6622000	540355	7078.65	29881.6
															Lung_TcellRestim_Pichia_008.fcs	12.4	7.58	1.23	7.52	7812000	592150	7283.44	44529.6

## Sheet: Sexes
Eos	Control male	Control female		Pichia male	Pichia female		IL-17	Control male	Control female		Pichia male	Pichia female		RORgT	Control male	Control female		Pichia male	Pichia female		ICOS	Control male	Control female		Pichia male	Pichia female		GATA #	male control	female control		Pichia male	Pichia female
	17.8	36.1		20.2	56.1			0.21	0.9		0.18	0.84			5.88	7.32		12.9	13.8			8.71	11.2		21.8	21.3			21148.7	12937.3		42211.5	18445
	22	19.3		60.6	62.3			0.17	0.28		1.31	1.45			4.59	8.55		12.8	12.5			5.96	13.7		20.8	20			19636.3	23762.7		35294.4	29300.5
	7.44	18		29.8	40.5			1.19	0.83		1	2.67			2.16	2.73		2.35	3.85			13.5	12.9		16	17.9			14760.7	12771.3		36056.6	17707.4
	23.3	34.7		70.7	19.1			1.06	0.64		3.29	0.43			1.95	3.63		4.79	3.03			19.6	17.8		25	12.6			21239.7	18520		35543.7	35898
	8.77	19.9		56.3	70.6			0.74	0.67		2.99	2.23			2.41	1.88		7.22	5.07			8.77	11.4		24.9	16.7			24948.8			32679.4	42210.9
	15.7	20		13.4	74.8			3.13	0.67		1.56	3.33			2.69	2.23		4.3	4.39			15.1	11.7		12.2	26.3						35873.2	48970.9
	14.2			14.3	70.7			0.95			1.14	5.53			2.74			3.15	7.48			12.7			11.5	31.9						37237.2
				26.4	70.5						3.07	7.52						7.55	8.72						16.3	36.3
				20.7							2.13			Il-4				4.6							17.7
															Control male	Control female		Pichia male	Pichia female
															0.47	0.88		0.78	0.93
															0.79	0.28		1.15	0.57
															1.31	1.02		0.81	0.59
															0.36	0.95		0.7	1.31
															1.99	0.81		0.13	1.23
															1.92	0.81		0.44	1.54
															1.27			0.26	0.31
																		2.26	1.81
																		4.19
