# Supplementary material for: Bacterial–fungal interactions in the neonatal gut influence asthma outcomes later in life
Source: eLife. 2021 Apr 20;10:e67740. doi: 10.7554/eLife.67740 (PMC8075585; doi:10.7554/eLife.67740)
Supplement: Figure 2—source data 2. [file elife-67740-fig2-data2.xlsx]

## Sheet: Sheet1
	CTRL	Pichia
	76.6347	300.054
	1975.82	10748.2
	1775.5	3250.2
	455.629	6821.53
	719.73	705.037
	6650.73	1335.88
	543.5	11461.7
	283.12	2609.77
	2012.92	3819.51
	429.154
	433.255
	50.0045	1792.48
	93.9695	339.954
		326.097
		820.159
		352.878
		28180.6
		38339.8
		43534.9
	0.0515872
