# Supplementary material for: Bacterial–fungal interactions in the neonatal gut influence asthma outcomes later in life
Source: eLife. 2021 Apr 20;10:e67740. doi: 10.7554/eLife.67740 (PMC8075585; doi:10.7554/eLife.67740)
Supplement: Figure 2—source data 3. [file elife-67740-fig2-data3.xlsx]

## Sheet: Sheet1
		Slide	Perivascular infiltration (Max 5)	Peribronchial infiltration (Max 5)	Parenchymal infiltration (Max 5)	Epithelium Damage (Max 5)	Total
		1	3	3	3	4	13	P1
		2	2	2	2	2	8	C1
		3	1	1	1	1	4	C3
		4	4	4	3	4	15	P3
		5	2	2	2	1	7	C2
		6	4	4	3	5	16	P2
		7	2	1	2	2	7	C4
		8	3	3	3	4	13	P4
