# Supplementary material for: Bacterial–fungal interactions in the neonatal gut influence asthma outcomes later in life
Source: eLife. 2021 Apr 20;10:e67740. doi: 10.7554/eLife.67740 (PMC8075585; doi:10.7554/eLife.67740)
Supplement: Figure 2—source data 4. [file elife-67740-fig2-data4.xlsx]

## Sheet: Sheet2
	Set: 2018-01
	Slide #	Perivascular infiltration (Max 5)	Peribronchial infiltration (Max 5)	Parenchymal infiltration (Max 5)	Epithelium Damage (Max 5)	Total
	1	3	2	3	2	10	C2
	2	4	5	4	4	17	C4
	3	3	3	4	4	14	C3
	4	2	2	3	4	11	C7
	5	5	5	5	5	20	P5
	6	2	2	2	2	8	C1
	7	4	4	3	2	13	P4
	8	4	4	5	3	16	P3
	9	2	3	2	2	9	P2
	10	3	3	4	2	12	C6
	11	3	3	2	2	10	C5
	12	3	3	4	2	12	P1
