# Supplementary material for: Bacterial–fungal interactions in the neonatal gut influence asthma outcomes later in life
Source: eLife. 2021 Apr 20;10:e67740. doi: 10.7554/eLife.67740 (PMC8075585; doi:10.7554/eLife.67740)
Supplement: Figure 2—source data 5. [file elife-67740-fig2-data5.xlsx]

## Sheet: Sheet2
	Set: 2018-09-03
	Slide #	Perivascular infiltration (Max 5)	Peribronchial infiltration (Max 5)	Parenchymal infiltration (Max 5)	Epithelium Damage (Max 5)	Total
	1	2	3	3	3	11	P3
	2	1	2	3	2	8	P1
	3	2	2	2	3	9	P5
	4	5	5	5	5	20	P7
	5	2	3	4	4	13	P8
	6	2	3	2	3	10	P2
	7	4	5	5	4	18	P6
	8	3	3	4	3	13	P4
	9	2	2	3	4	11	C2
	10	1	1	2	2	6	C1
