# Supplementary material for: Bacterial–fungal interactions in the neonatal gut influence asthma outcomes later in life
Source: eLife. 2021 Apr 20;10:e67740. doi: 10.7554/eLife.67740 (PMC8075585; doi:10.7554/eLife.67740)
Supplement: Figure 3—figure supplement 1—source data 1. [file elife-67740-fig3-figsupp1-data1.xlsx]

## Sheet: Sheet1
Roz Pichia Revisions Experiment 1
2020-07-17		Day 14
Mouse ID (Cage-Mouse)	Ear Notch	Group	Gender	Fecal Tube Weight Before (g)	Fecal Tube Weight After (g)*	Fecal Sample Weight (g)	Pichia Counts (neat, 100 µL)	Pichia CFU/g
2020-01-01		Ctrl		1.1957	1.1967	0.001	0
2020-02-01		Ctrl		1.2066	1.2071	0.0005	0
2020-02-02		Ctrl		1.1349	1.1351	0.0002	0
2020-02-03		Ctrl		1.1328	1.1332	0.0004	0
2020-02-04		Ctrl		1.1453	1.1456	0.0003	0
2020-03-01		Ctrl		1.167	1.1712	0.0042	0
2020-04-01		Ctrl		1.1941	1.1956	0.0015	0
P1-1		Pichia		1.1381	1.1395	0.0014	5	7142.86
P1-2		Pichia		1.139	1.1397	0.0007	6	17142.9
P3-1		Pichia		1.1849	1.1857	0.0008	2	5000
P3-2		Pichia		1.1554	1.1559	0.0005	4	16000
P3-3		Pichia		1.1258	1.1269	0.0011	0
P4-1		Pichia		1.1845	1.185	0.0005	0
P4-2		Pichia		1.1929	1.1931	0.0002	0
				*counts suspended in 200 µL rather than 1 mL
	2020-07-30	Day 18
Mouse ID (Cage-Mouse)	Ear Notch	Group	Gender	Fecal Tube Weight Before (g)	Fecal Tube Weight After (g)*	Fecal Sample Weight (g)	Pichia Counts (neat, 100 µL)	Pichia CFU/g	Mouse ID Post-Wean
2020-01-01		Ctrl		1.1012	1.1053	0.0041	0	0
2020-01-02		Ctrl		1.097	1.1012	0.0042	0	0
2020-01-03		Ctrl		1.0912	1.0935	0.0023	0	0
2020-01-04		Ctrl		1.0908	1.0972	0.0064	0	0
2020-03-01		Ctrl		1.0931	1.098	0.0049	0	0
2020-04-01		Ctrl		1.0942	1.0996	0.0054	0	0
2020-04-02		Ctrl		1.1042	1.1069	0.0027	0	0
2020-04-03		Ctrl		1.0938	1.0956	0.0018	0	0
C5		Ctrl		1.1004	1.103	0.0026	0	0
C10		Ctrl		1.0966	1.0997	0.0031	0	0
2020-01-01		Pichia	Female	1.102	1.1052	0.0032	31	968.75
2020-01-02		Pichia	Female	1.0866	1.0869	0.0003	0	0
2020-01-03		Pichia	Female	1.0944	1.1	0.0056	6	107.143
2020-01-04		Pichia	Male	1.0998	1.1039	0.0041	23	560.976
2020-02-01		Pichia	Female	1.0983	1.104	0.0057	4	70.1754
2020-02-02		Pichia	Male	1.101	1.1054	0.0044	101	2295.45
2020-03-01		Pichia	Male	1.0974	1.0994	0.002	16	800
2020-03-02		Pichia	Male	1.0931	1.0947	0.0016	40	2500
2020-03-03		Pichia	Male	1.0928	1.0944	0.0016	8	500
2020-04-01		Pichia	Female	1.0988	1.1015	0.0027	2	74.0741
2020-04-02		Pichia	Female	1.1045	1.1074	0.0029	25	862.069
2020-04-03		Pichia	Male	1.1042	1.1047	0.0005	4	800
2020-04-04		Pichia	Male	1.0895	1.0915	0.002	0	0
2020-04-05		Pichia	Male	1.094	1.0959	0.0019	0	0
2020-04-06		Pichia	Male	1.1018	1.1024	0.0006	2	333.333
				*resuspended in 1ml PBS
	2020-08-03	21
Mouse ID (Cage-Mouse)	Ear Notch	Group	Gender	Fecal Tube Weight Before (g)	Fecal Tube Weight After (g)*	Fecal Sample Weight (g)	Pichia Counts (neat, 100 µL)	Pichia CFU/g	Mouse ID Post-Wean
2020-01-01		Ctrl		1.1041	1.122	0.0179	0	0	C1-1
2020-01-02		Ctrl		1.1041	1.1186	0.0145	0	0	C1-2
2020-01-03		Ctrl		1.1008	1.1099	0.0091	0	0	C4-1
2020-01-04		Ctrl		1.0913	1.1004	0.0091	0	0	C4-2
2020-03-01		Ctrl		1.0995	1.1122	0.0127	0	0	C4-3
2020-04-01		Ctrl		1.0935	1.1089	0.0154	0	0	C6-1
2020-04-02		Ctrl		1.1009	1.109	0.0081	0	0	C6-2
2020-04-03		Ctrl		1.0944	1.1164	0.022	0	0	C6-3
C5		Ctrl		1.0946	1.1097	0.0151	0	0	C7-1
C10		Ctrl		1.09	1.1129	0.0229	0	0	C7-2
2020-01-01		Pichia	Female	1.0977	1.1231	0.0254	0	0
2020-01-02		Pichia	Female	1.0972	1.1299	0.0327	0	0
2020-01-03		Pichia	Female	1.0936	1.1183	0.0247	0	0
2020-01-04		Pichia	Male	1.0919	1.1136	0.0217	0	0	P2-1
2020-02-01		Pichia	Female	1.1038	1.1214	0.0176	0	0	P2-2
2020-02-02		Pichia	Male	1.0863	1.0923	0.006	0	0	P2-3
2020-03-01		Pichia	Male	1.1015	1.1085	0.007	0	0	P5-1
2020-03-02		Pichia	Male	1.0981	1.1169	0.0188	0	0	P5-2
2020-03-03		Pichia	Male	1.1003	1.136	0.0357	0	0	P5-3
2020-04-01		Pichia	Female	1.0945	1.1175	0.023	0	0	P5-4
2020-04-02		Pichia	Female	1.0934	1.1182	0.0248	0	0	P4-4
2020-04-03		Pichia	Male	1.0944	1.11	0.0156	0	0	P4-1
2020-04-04		Pichia	Male	1.1026	1.1226	0.02	0	0	P4-2
2020-04-05		Pichia	Male	1.0944	1.0944	0	0	#DIV/0!	P4-3	*no feces collected
2020-04-06		Pichia	Male	1.1029	1.1109	0.008	0	0	P4-5
				*resuspended in 1ml PBS

## Sheet: Day 16 Sac
Day 16 Sac
10 control (5 male, 5 female); 10 pichia (5 male, 5 female)
2020-07-28
Pichia fecal and intestinal counts
Feces				Plate Counts
Sample	Weight Before	Weight After	Sample Weight (g)	Rep 1	Rep 2	Average	Dilution Factor	CFU/g	Notes
C1	2.728	2.7309	0.0029	0		0	1	0
C2	2.7256	2.7274	0.0018	0		0	1	0	is C7
C3	2.731	2.7376	0.0066	0		0	1	0	is C6
C4	2.6971	2.6987	0.0016	0		0	1	0
C5	2.7288	2.7319	0.0031	0		0	1	0
C6	2.7314	2.7364	0.005	0		0	1	0	now C3
C7	2.7028	2.7143	0.0115	0		0	1	0	now C2
C8	2.7365	2.7384	0.0019	0		0	1	0
C9	2.7399	2.7571	0.0172	0		0	1	0
C10	2.7233	2.7341	0.0108	0		0	1	0
P1	2.7261	2.7317	0.0056	99		99	1	176786
P2	2.6998	2.7036	0.0038	883		883	1	2.32368e+06
P3	2.7169	2.7189	0.002	108		108	1	540000
P4	2.7082	2.7093	0.0011	3		3	1	27272.7
P5	2.7146	2.7162	0.0016	1		1	1	6250
P6	2.7051	2.7173	0.0122	623		623	1	510656
P7	2.7256	2.7289	0.0033	40		40	1	121212
P8	2.7197	2.7237	0.004	122		122	1	305000
P9	2.7015	2.7106	0.0091	209		209	1	229670
P10	2.7309	2.731	0.0001	2		2	1	200000
Intestine				Plate Counts
Sample	Weight Before	Weight After	Sample Weight (g)	Rep 1	Rep 2	Average	Dilution Factor	CFU/g	Notes
C1	2.716	2.7238	0.0078	0		0	1	0	is C10
C2	2.7225	2.7368	0.0143	0		0	1	0	is C7
C3	2.7312	2.7378	0.0066	0		0	1	0	is C6
C4	2.7067	2.7111	0.0044	0		0	1	0
C5	2.7258	2.7363	0.0105	0		0	1	0
C6	2.716	2.7532	0.0372	0		0	1	0	is C3
C7	2.7085	2.7196	0.0111	0		0	1	0	is C2
C8	2.7284	2.7327	0.0043	0		0	1	0
C9	2.7317	2.7516	0.0199	0		0	1	0
C10	2.6878	2.6954	0.0076	0		0	1	0	is C1
P1	2.7057	2.719	0.0133	313		313	1	235338
P2	2.7156	2.7275	0.0119	15	13	14	10	1.17647e+06
P3	2.7369	2.7456	0.0087	123		123	1	141379
P4	2.7175	2.7243	0.0068	5		5	1	7352.94
P5	2.722	2.7247	0.0027	2		2	1	7407.41
P6	2.7226	2.7327	0.0101	38		38	1	37623.8
P7	2.7078	2.7136	0.0058	14		14	1	24137.9
P8	2.7112	2.7198	0.0086	107		107	1	124419
P9	2.7107	2.7236	0.0129	365		365	1	282946
P10	2.7223	2.725	0.0027	2		2	1	7407.41
