# Supplementary material for: Bacterial–fungal interactions in the neonatal gut influence asthma outcomes later in life
Source: eLife. 2021 Apr 20;10:e67740. doi: 10.7554/eLife.67740 (PMC8075585; doi:10.7554/eLife.67740)
Supplement: Figure 3—figure supplement 4—source data 1. [file elife-67740-fig3-figsupp4-data1.xlsx]

## Sheet: Tcell_restim
Sample	Count	Cells/ml	Total cells	Restim	Sample:	Lymphocytes	IFNg+ lymphs	IL-4+	IL-5+	IL-13+	IL-17+	Lymphocytes	IFNg+ lymphs	IL-4+	IL-5+	IL-13+	IL-17+		Histology path score				Sample:	Cells | Freq. of Parent	Cells/Singlets | Freq. of Parent	Cells/Singlets/CD45+Cd11bhigh | Freq. of Parent	Cells/Singlets/CD45+Cd11bhigh/SinglecF+ | Freq. of Parent	Cells/Singlets/CD45+Cd11bhigh/SinglecF+good | Freq. of Parent	Cells | Freq. of Parent	Cells/Singlets | Freq. of Parent	Cells/Singlets/CD45+Cd11bhigh | Freq. of Parent	Cells/Singlets/CD45+Cd11bhigh/SinglecF+ | Freq. of Parent	Cells/Singlets/CD45+Cd11bhigh/SinglecF+good | Freq. of Parent										Sample:	Cells | Freq. of Parent	Cells/Singlets | Freq. of Parent	Cells/Singlets/CD45+CD11b+ | Freq. of Parent	Cells/Singlets/CD45+CD11b+/Neutrophils GR1+SinglecF- | Freq. of Parent	Cells | Freq. of Parent	Cells/Singlets | Freq. of Parent
Control lung 1	20	10000000	20000000		Control lung 1	52.9	10.5	0.00267	0.024	9.31	9.94	10580000	1110900	282.486	2539.2	984998	1051652						Control lung 1	81.1	99	11.9	7.81	7.9	16220000	16057800	1.91088e+06	149240	150959										Control lung 1	81.1	99	19.7	35.3	16220000	16057800
Control lung 2	31	15500000	31000000		Control lung 2	50.7	14.8	0.00621	0.085	14.1	15.6	15717000	2326116	976.026	13359.5	2216097	2451852		10				Control lung 2	81.6	99.4	16.1	32.5	32.6	25296000	25144224	4.04822e+06	1.31567e+06	1.31972e+06										Control lung 2	81.6	99.4	23.9	32.7	25296000	25144224
Control lung 3	33	16500000	33000000		Control lung 3	42.8	19.1	0.016	0.2	13	16.4	14124000	2697684	2259.84	28248	1836120	2.31634e+06		8				Control lung 3	81.4	99.3	32.8	57.9	58.5	26862000	26673966	8.74906e+06	5.06571e+06	5.1182e+06										Control lung 3	81.4	99.3	40.2	20.9	26862000	26673966
Control lung 4	28	14000000	28000000		Control lung 4	49.8	13.2	0.00135	0.018	8.83	10.2	13944000	1840608	188.244	2509.92	1.23126e+06	1422288		9				Control lung 4	78.9	99	12.7	17.7	18.3	22092000	21871080	2.77763e+06	491640	508306										Control lung 4	78.9	99	18.4	33.4	22092000	21871080
Control lung 5	38	19000000	38000000		Control lung 5	49.6	14.6	0.0068	0.073	9.07	10.9	18848000	2751808	1281.66	13759	1.70951e+06	2054432		14				Control lung 5	79.9	99	14.9	27.9	28.5	30362000	30058380	4.4787e+06	1.24956e+06	1.27643e+06										Control lung 5	79.9	99	22.5	27.5	30362000	30058380
Control lung 6	32	16000000	32000000		Control lung 6	42.6	11.4	0.00349	0.18	14.8	13.6	13632000	1554048	475.757	24537.6	2017536	1853952		9				Control lung 6	85.1	99.4	32.2	63.3	64.1	27232000	27068608	8.71609e+06	5.51729e+06	5.58701e+06										Control lung 6	85.1	99.4	39.9	13.9	27232000	27068608
Control lung 7	33	16500000	33000000		Control lung 7	53.4	12.5	0.00526	0.03	10.6	10.8	17622000	2202750	926.917	5286.6	1867932	1903176		12				Control lung 7	81.1	99.2	13.9	25.5	25.3	26763000	26548896	3.6903e+06	941026	933645										Control lung 7	81.1	99.2	22.5	29.7	26763000	26548896
Pichia lung 1	35	17500000	35000000		Pichia lung 1	57.6	10.3	0.0078	0.034	8.3	9.28	20160000	2076480	1572.48	6854.4	1673280	1870848						Pichia lung 1	82.1	99.4	14	19	20	28735000	28562590	3.99876e+06	759765	799753										Pichia lung 1	82.1	99.4	20.7	31.3	28735000	28562590
Pichia lung 2	35	17500000	35000000		Pichia lung 2	57	13.6	0.00382	0.047	10.5	12.5	19950000	2713200	762.09	9376.5	2094750	2493750		5				Pichia lung 2	79.8	99.2	13.2	15	15.8	27930000	27706560	3.65727e+06	548590	577848										Pichia lung 2	79.8	99.2	19.4	34.9	27930000	27706560
Pichia lung 3	69	34500000	69000000		Pichia lung 3	39.6	12.9	0.012	0.3	16.3	15.3	27324000	3524796	3278.88	81972	4453812	4180572		19				Pichia lung 3	89.5	99.5	43	74.4	74.4	61755000	61446225	2.64219e+07	1.96579e+07	1.96579e+07										Pichia lung 3	89.5	99.5	50.3	11.8	61755000	61446225
Pichia lung 4	36	18000000	36000000		Pichia lung 4	50.8	10.4	0.00278	0.087	11.3	11.2	18288000	1901952	508.406	15910.6	2066544	2048256		4				Pichia lung 4	82.1	99.2	21	33.1	33.5	29556000	29319552	6.15711e+06	2.038e+06	2.06263e+06										Pichia lung 4	82.1	99.2	27.7	27.7	29556000	29319552
Pichia lung 5	32	16000000	32000000		Pichia lung 5	47.5	13.1	0.013	0.099	11.7	12	15200000	1991200	1976	15048	1778400	1824000		18				Pichia lung 5	81.7	99.3	21	47.5	47.8	26144000	25960992	5.45181e+06	2.58961e+06	2.60596e+06										Pichia lung 5	81.7	99.3	28.9	23.6	26144000	25960992
Pichia lung 6	27	13500000	27000000		Pichia lung 6	47.9	15	0.0057	0.054	9.27	10.5	12933000	1939950	737.181	6983.82	1.19889e+06	1357965		11				Pichia lung 6	80.1	99	13.7	25.5	25.7	21627000	21410730	2.93327e+06	747984	753850										Pichia lung 6	80.1	99	22.1	27	21627000	21410730
Pichia lung 7	42	21000000	42000000		Pichia lung 7	42.8	16.9	0.00325	0.13	15.5	15.2	1.7976e+07	3.03794e+06	584.22	23368.8	2.78628e+06	2.73235e+06		13				Pichia lung 7	82.3	99.3	29.1	65.9	65.1	34566000	34324038	9.9883e+06	6.58229e+06	6.50238e+06										Pichia lung 7	82.3	99.3	35.7	17.4	34566000	34324038
Pichia lung 8	36	18000000	36000000		Pichia lung 8	45.8	16	0.00297	0.12	11.1	12.2	16488000	2638080	489.694	19785.6	1830168	2011536		7				Pichia lung 8	73.9	99.2	24.1	44.3	43.1	26604000	26391168	6.36027e+06	2.8176e+06	2.74128e+06										Pichia lung 8	73.9	99.2	31.4	29.7	26604000	26391168
						Sample:	Lymphocytes | Freq. of Parent	Lymphocytes/T cells | Freq. of Parent	Lymphocytes/T cells/Foxp3 | Freq. of Parent	Lymphocytes/T cells/GATA3 | Freq. of Parent	Lymphocytes/T cells/ICOS | Freq. of Parent	Lymphocytes/T cells/Roryt | Freq. of Parent	Lymphocytes | Freq. of Parent	Lymphocytes/T cells | Freq. of Parent	Lymphocytes/T cells/Foxp3 | Freq. of Parent	Lymphocytes/T cells/GATA3 | Freq. of Parent	Lymphocytes/T cells/ICOS | Freq. of Parent	Lymphocytes/T cells/Roryt | Freq. of Parent					Sample:	Cells | Freq. of Parent	Cells/APCcells-CD11c+CDllbint | Freq. of Parent	Cells/APCcells-CD11c+CDllbint/DC | Freq. of Parent	Cells/APCcells-CD11c+CDllbint/Macrophages | Freq. of Parent	Cells/CDllcneg | Freq. of Parent	Cells/CDllcneg/Eosinophils | Freq. of Parent	Cells/Lymphocytes | Freq. of Parent	Cells/Lymphocytes/B cells | Freq. of Parent	Cells/Lymphocytes/T cells | Freq. of Parent	Cells/Non-lymphocytes | Freq. of Parent	Cells/Non-lymphocytes/cdllbhigh | Freq. of Parent	Cells/Non-lymphocytes/cdllbhigh/Eos | Freq. of Parent	Cells/Non-lymphocytes/cdllbhigh/Neutros | Freq. of Parent	Cells/Non-lymphocytes/Macrophages | Freq. of Parent	Cells | Freq. of Parent	Cells/APCcells-CD11c+CDllbint | Freq. of Parent	Cells/APCcells-CD11c+CDllbint/DC | Freq. of Parent	Cells/APCcells-CD11c+CDllbint/Macrophages | Freq. of Parent	Cells/CDllcneg | Freq. of Parent	Cells/CDllcneg/Eosinophils | Freq. of Parent	Cells/Lymphocytes | Freq. of Parent	Cells/Lymphocytes/B cells | Freq. of Parent	Cells/Lymphocytes/T cells | Freq. of Parent	Cells/Non-lymphocytes | Freq. of Parent	Cells/Non-lymphocytes/cdllbhigh | Freq. of Parent	Cells/Non-lymphocytes/cdllbhigh/Eos | Freq. of Parent
						Control lung 1	50.5	5.02	12	0.18	12	4.08	10100000	507020	60842.4	912.636	60842.4	20686.4					Control lung 1	54.3	6.98	15.9	76.5	91.5	0.71	43.3	76.2	21.9	54.6	6.99	11.7	57.7	6.1	10860000	758028	120526	579891	9936900	70552	4.70238e+06	3.58321e+06	1.02982e+06	5929560	414476	48493.7
						Control lung 2	47.9	7.03	14.7	0	15.2	5.34	14849000	1.04388e+06	153451	0	158670	55743.4					Control lung 2	53.6	6.46	30	63.6	91.6	5.89	44.5	72.8	25.6	53.3	14.8	44.8	35.7	7.27	16616000	1.07339e+06	322018	682678	15220256	896473	7394120	5.38292e+06	1.89289e+06	8856328	1.31074e+06	587210
						Control lung 3	41.3	7.37	14.6	0	24.4	6.66	13629000	1.00446e+06	146651	0	245088	66896.9					Control lung 3	53.9	4.8	53.6	31.7	92.2	18.5	35.9	68.9	28.3	61.5	22.4	72	12	13.7	17787000	853776	457624	270647	16399614	3.03393e+06	6385533	4.39963e+06	1.80711e+06	10939005	2.45034e+06	1.76424e+06
						Control lung 4	43.9	4.97	11.8	0.052	12	4.03	12292000	610912	72087.7	317.674	73309.5	24619.8					Control lung 4	52.8	6.14	23.2	71.7	92.4	2.05	36.7	76.7	21	61	7.83	32.5	37.9	5.39	14784000	907738	210595	650848	13660416	280039	5425728	4.16153e+06	1.1394e+06	9018240	706128	229492
						Control lung 5	49.5	5.49	13.9	0.07	14.9	7.84	18810000	1032669	143541	722.868	153868	80961.2					Control lung 5	57.7	6.57	38.8	53.9	90.8	3.87	38.8	77.5	21	58.8	8.26	44.6	30.8	6.51	21926000	1.44054e+06	558929	776450	19908808	770471	8.50729e+06	6.59315e+06	1.78653e+06	12892488	1.06492e+06	474954
						Control lung 6	43	7.8	20.3	0.02	21.4	10.2	13760000	1073280	217876	214.656	229682	109475					Control lung 6	65.5	7.69	59.1	26.1	87.3	18.5	40	72.5	24.5	57.4	21	76.3	8.68	11.8	20960000	1611824	952588	420686	18298080	3.38514e+06	8384000	6078400	2054080	12031040	2.52652e+06	1.92773e+06
						Control lung 7	53.5	5.37	16.6	0.047	11.6	6.18	17655000	948074	157380	445.595	109977	58590.9					Control lung 7	60.6	5.69	27.9	67.3	92.3	3.17	43	74.9	23.6	54.2	9.89	34.9	34.7	4.71	19998000	1.13789e+06	317470	765797	18458154	585123	8599140	6.44076e+06	2.0294e+06	10838916	1.07197e+06	374117
						Pichia lung 1	50.5	4.12	14.8	0.091	12.1	10.5	17675000	728210	107775	662.671	88113.4	76462.1					Pichia lung 1	55.5	4.3	29.6	66.6	94.4	2.1	35.3	79.8	18.3	62.2	7.8	34.6	31.9	6.45	19425000	835275	247241	556293	18337200	385081	6857025	5.47191e+06	1.25484e+06	12082350	942423	326078
						Pichia lung 2	48.5	5.1	15	0.048	12.2	9.38	16975000	865725	129859	415.548	105618	81205					Pichia lung 2	52.9	4.12	24.1	70.9	94.8	2.11	37.5	74.5	24.1	60.6	7.43	34	38.1	6.22	18515000	762818	183839	540838	17552220	370352	6943125	5.17263e+06	1.67329e+06	11220090	833653	283442
						Pichia lung 3	44.3	12.4	20.4	0	33.4	17.9	30567000	3790308	773223	0	1.26596e+06	678465					Pichia lung 3	74.8	6.12	71.1	7.52	89.6	28.8	46.8	69.3	26.6	50.6	33.7	80.8	7.03	19.8	51612000	3.15865e+06	2.2458e+06	237531	46244352	1.33184e+07	24154416	1.6739e+07	6.42507e+06	26115672	8.80098e+06	7.11119e+06
						Pichia lung 4	52.8	6.12	14.7	0	12.9	7.02	19008000	1.16329e+06	171004	0	150064	81662.9					Pichia lung 4	60.4	5.48	48.2	42.7	92.4	7.04	37.4	71.9	25.9	60.4	14.6	47.1	21	9.05	21744000	1.19157e+06	574337	508801	2.00915e+07	1.41444e+06	8132256	5.84709e+06	2.10625e+06	13133376	1.91747e+06	903130
						Pichia lung 5	48.3	6.39	15.3	0.084	19.4	7.76	15456000	987638	151109	829.616	191602	76640.7					Pichia lung 5	56.3	5.89	48.4	39.9	91.4	9.38	40.6	74.5	23.4	56.8	13.7	59.7	20.8	8.78	18016000	1.06114e+06	513593	423396	16466624	1.54457e+06	7314496	5.4493e+06	1.71159e+06	10233088	1.40193e+06	836954
						Pichia lung 6	46	5.77	15.6	0	16.2	9.7	12420000	716634	111795	0	116095	69513.5					Pichia lung 6	52.3	6.74	27.1	68.2	91.3	3.63	39.4	71	27	57.8	8.6	47.4	26.4	6.21	14121000	951755	257926	649097	12892473	467997	5563674	3.95021e+06	1.50219e+06	8161938	701927	332713
						Pichia lung 7	46.4	8.95	13.1	0.017	18.6	9.38	19488000	1744176	228487	296.51	324417	163604					Pichia lung 7	61.9	5.67	56.1	28.3	90.8	18.4	42.2	66.8	30.1	55.5	21.6	77.2	9.42	11.6	25998000	1.47409e+06	826963	417167	23606184	4.34354e+06	10971156	7.32873e+06	3.30232e+06	14428890	3.11664e+06	2.40605e+06
						Pichia lung 8	43.6	6.2	16.3	0.046	18.3	9.26	15696000	973152	158624	447.65	178087	90113.9					Pichia lung 8	55.4	6.46	49.9	38.7	90.4	8.61	38.7	73.6	24.3	58.6	14.2	50.4	30.4	6.84	19944000	1.28838e+06	642903	498604	18029376	1.55233e+06	7718328	5.68069e+06	1.87555e+06	11687184	1.65958e+06	836428
[truncated: 2 more columns]
