# Supplementary material for: Bacterial–fungal interactions in the neonatal gut influence asthma outcomes later in life
Source: eLife. 2021 Apr 20;10:e67740. doi: 10.7554/eLife.67740 (PMC8075585; doi:10.7554/eLife.67740)
Supplement: Figure 3—figure supplement 4—source data 2. [file elife-67740-fig3-figsupp4-data2.xlsx]

## Sheet: Sheet2
Application: Tecan i-control				Tecan i-control , 1.7.1.7
Device: infinite 200				Serial number: 906002512				Serial number of connected stacker:
Firmware: V_2.12_04/10_InfiniTe (Apr 26 2010/11.30.08)				MAI, V_2.12_04/10_InfiniTe (Apr 26 2010/11.30.08)
Date:	2019-10-21
Time:	5:27:28 PM
System				MSL-SHARED-0015
User				MSL-SHARED-0015\Tecan
Plate				ThermoFisher SCIENTIFIC 96 Flat Bottom Transparent PS Cat.No.: 167311/ 167314/ 267312/ 267313 [NUN96ft_EdgePlate.pdfx]
Plate-ID (Stacker)
Label: Label1
Mode				Absorbance
Wavelength				450	nm
Bandwidth				9	nm
Number of Flashes				25
Settle Time				0	ms
Start Time:	10/21/2019 5:27:28 PM
	Temperature: 24.3 °C
<>	1	2	3	4	5	6	7	8	9	10	11	12
A	2.6923	2.7321	2.2375	2.33	2.476	2.2699	0.1184	0.1099	0.4818	0.5523	0.5403	0.5251
B	1.4959	1.5023	2.0731	1.8205	2.609	2.5685	0.4563	0.4844	0.4717	0.4238	1.203	1.2701
C	0.7192	0.7142	3.0217	2.955	1.6691	1.6557	0.6007	0.6475	0.5932	0.6063	0.4864	0.5093
D	0.3227	0.3503	2.4007	2.5612	2.4978	2.4267	0.4788	0.4727	0.4255	0.4117	0.6873	0.7332
E	0.2022	0.2357	2.5576	2.4576	2.5619	2.7527	0.398	0.433	0.5215	0.5599	0.52	0.543
F	0.1687	0.1842	2.8494	2.7805	3.0847	3.0871	0.5639	0.5624	0.1438	0.1566	0.4579	0.4693
G	0.1536	0.1677	1.9466	1.964	2.6231	2.7126	0.6063	0.6033	0.6353	0.6498	0.602	0.6566
H	0.1626	0.1616	2.5326	2.7276	0.1628	0.1837	0.166	0.1456	0.7339	0.7968	0.532	0.5164
End Time:	10/21/2019 5:28:45 PM
Label: Label2
Mode				Absorbance
Wavelength				550	nm
Bandwidth				9	nm
Number of Flashes				25
Settle Time				0	ms
Start Time:	10/21/2019 5:28:50 PM
	Temperature: 24.6 °C
<>	1	2	3	4	5	6	7	8	9	10	11	12
A	0.0766	0.0735	0.0665	0.0675	0.0727	0.0705	0.039	0.0341	0.0399	0.0419	0.0478	0.0541
B	0.067	0.0546	0.0681	0.057	0.0755	0.0758	0.0385	0.0398	0.0462	0.0466	0.0539	0.0562
C	0.0481	0.043	0.0897	0.0831	0.059	0.055	0.0466	0.0428	0.0443	0.0457	0.0418	0.045
D	0.0445	0.0463	0.0685	0.0761	0.0896	0.0721	0.0631	0.0671	0.0471	0.0479	0.0465	0.046
E	0.044	0.0655	0.0818	0.0763	0.08	0.0835	0.0532	0.0658	0.0452	0.049	0.0454	0.0452
F	0.0432	0.0528	0.0988	0.0835	0.0887	0.0913	0.0577	0.0529	0.0453	0.0499	0.0509	0.0485
G	0.0427	0.0547	0.0672	0.0679	0.0757	0.0769	0.0498	0.0544	0.0549	0.0525	0.0551	0.055
H	0.0481	0.0533	0.0816	0.1269	0.0494	0.0494	0.0505	0.0487	0.0517	0.0562	0.0566	0.0573
End Time:	10/21/2019 5:30:06 PM

## Sheet: Sheet1
<>	1	2	3	4	5	6	7	8	9	10	11	12		<>	1	2	3	4	5	6	7	8	9	10	11	12
A	2.6923	2.7321	2.2375	2.33	2.476	2.2699	0.1184	0.1099	0.4818	0.5523	0.5403	0.5251		A	2.6157	2.6586	2.171	2.2625	2.4033	2.1994	0.0794	0.0758	0.4419	0.5104	0.4925	0.471
B	1.4959	1.5023	2.0731	1.8205	2.609	2.5685	0.4563	0.4844	0.4717	0.4238	1.203	1.2701		B	1.4289	1.4477	2.005	1.7635	2.5335	2.4927	0.4178	0.4446	0.4255	0.3772	1.1491	1.2139
C	0.7192	0.7142	3.0217	2.955	1.6691	1.6557	0.6007	0.6475	0.5932	0.6063	0.4864	0.5093		C	0.6711	0.6712	2.932	2.8719	1.6101	1.6007	0.5541	0.6047	0.5489	0.5606	0.4446	0.4643
D	0.3227	0.3503	2.4007	2.5612	2.4978	2.4267	0.4788	0.4727	0.4255	0.4117	0.6873	0.7332		D	0.2782	0.304	2.3322	2.4851	2.4082	2.3546	0.4157	0.4056	0.3784	0.3638	0.6408	0.6872
E	0.2022	0.2357	2.5576	2.4576	2.5619	2.7527	0.398	0.433	0.5215	0.5599	0.52	0.543		E	0.1582	0.1702	2.4758	2.3813	2.4819	2.6692	0.3448	0.3672	0.4763	0.5109	0.4746	0.4978
F	0.1687	0.1842	2.8494	2.7805	3.0847	3.0871	0.5639	0.5624	0.1438	0.1566	0.4579	0.4693		F	0.1255	0.1314	2.7506	2.697	2.996	2.9958	0.5062	0.5095	0.0985	0.1067	0.407	0.4208
G	0.1536	0.1677	1.9466	1.964	2.6231	2.7126	0.6063	0.6033	0.6353	0.6498	0.602	0.6566		G	0.1109	0.113	1.8794	1.8961	2.5474	2.6357	0.5565	0.5489	0.5804	0.5973	0.5469	0.6016
H	0.1626	0.1616	2.5326	2.7276	0.1628	0.1837	0.166	0.1456	0.7339	0.7968	0.532	0.5164		H	0.1145	0.1083	2.451	2.6007	0.1134	0.1343	0.1155	0.0969	0.6822	0.7406	0.4754	0.4591
														std
Mode				Absorbance										100	2.63715		2.21675		2.30135		0.0776		0.47615		0.48175
Wavelength				550	nm									33.3333	1.4383		1.88425		2.5131		0.4312		0.40135		1.1815
Bandwidth				9	nm									11.1111	0.67115		2.90195		1.6054		0.5794		0.55475		0.45445
Number of Flashes				25										3.7037	0.2911		2.40865		2.3814		0.41065		0.3711		0.664
Settle Time				0	ms									1.23457	0.1642		2.42855		2.57555		0.356		0.4936		0.4862
Start Time:	10/21/2019 5:28:50 PM													0.411523	0.12845		2.7238		2.9959		0.50785		0.1026		0.4139
														0.137174	0.11195		1.88775		2.59155		0.5527		0.58885		0.57425
	Temperature: 24.6 °C													0	0.1114		2.52585		0.12385		0.1062		0.7114		0.46725
<>	1	2	3	4	5	6	7	8	9	10	11	12		std
A	0.0766	0.0735	0.0665	0.0675	0.0727	0.0705	0.039	0.0341	0.0399	0.0419	0.0478	0.0541		100	2.52575		2.10535		2.18995		-0.0338		0.36475		0.37035
B	0.067	0.0546	0.0681	0.057	0.0755	0.0758	0.0385	0.0398	0.0462	0.0466	0.0539	0.0562		33.3333	1.3269		1.77285		2.4017		0.3198		0.28995		1.0701
C	0.0481	0.043	0.0897	0.0831	0.059	0.055	0.0466	0.0428	0.0443	0.0457	0.0418	0.045		11.1111	0.55975		2.79055		1.494		0.468		0.44335		0.34305
D	0.0445	0.0463	0.0685	0.0761	0.0896	0.0721	0.0631	0.0671	0.0471	0.0479	0.0465	0.046		3.7037	0.1797		2.29725		2.27		0.29925		0.2597		0.5526
E	0.044	0.0655	0.0818	0.0763	0.08	0.0835	0.0532	0.0658	0.0452	0.049	0.0454	0.0452		1.23457	0.0528		2.31715		2.46415		0.2446		0.3822		0.3748
F	0.0432	0.0528	0.0988	0.0835	0.0887	0.0913	0.0577	0.0529	0.0453	0.0499	0.0509	0.0485		0.411523	0.01705		2.6124		2.8845		0.39645		-0.00879999		0.3025
G	0.0427	0.0547	0.0672	0.0679	0.0757	0.0769	0.0498	0.0544	0.0549	0.0525	0.0551	0.055		0.137174	0.000550006		1.77635		2.48015		0.4413		0.47745		0.46285
H	0.0481	0.0533	0.0816	0.1269	0.0494	0.0494	0.0505	0.0487	0.0517	0.0562	0.0566	0.0573		0	1.63083e-10		2.41445		0.01245		-0.0052		0.6		0.35585
																	ng/ul final				ng/mL
														69.0747	2.10535		345.374	C1	GF	0.827309	345374
														51.2474	1.77285		256.237	C2	GF		256237
														127.341	2.79055		636.706	C3	GF		636706
														81.7798	2.29725		408.899	C4	GF		408899
														83.2236	2.31715		416.118	C5	GF		416118
														108.173	2.6124		540.867	C6	GF		540867
														51.4126	1.77635		257.063	C7	GF		257063
														90.6746	2.41445		453.373	P1	GF		453373
														74.4188	2.18995		372.094	P2	GF		372094
														89.6594	2.4017		448.297	P3	GF		448297
														39.3015	1.494		196.508	P4	GF		196508
														79.8441	2.27		399.221	P5	GF		399221
														94.7519	2.46415		473.76	P6	GF		473760
														139.13	2.8845		695.649	P7	GF		695649
														96.1067	2.48015		480.534	P8	GF		480534
														0.361875	0.01245		1.80938
															-0.0338		0
														6.24941	0.3198		31.247	C3	2019-3b
														9.3844	0.468		46.922	C4	2019-3b
														5.83135	0.29925		29.1568	C5	2019-3b
														4.73811	0.2446		23.6906	C6	2019-3b	0.502515
														7.8438	0.39645		39.219	C7	2019-3b
														8.8034	0.4413		44.017	C8	2019-3b
														0.0417946	-0.0052		0.208973		2019-3b		35.8879
														7.17758	0.36475		35.8879	P2	2019-3b		28.2171
														5.64343	0.28995		28.2171	P3	2019-3b		44.2387
														8.84775	0.44335		44.2387	P5	2019-3b		25.1877
														5.03753	0.2597		25.1877	P6	2019-3b		37.7155
														7.5431	0.3822		37.7155	P7	2019-3b		47.9591
															-0.0088		0		2019-3b		61.8475
														9.59181	0.47745		47.9591	P8	2019-3b		36.4728
														12.3695	0.6		61.8475	P9	2019-3b
														7.29456	0.37035		36.4728	P10	2019-3b
														24.8137	1.0701		124.069	C1	2019-4b	0.196363
														6.72711	0.34305		33.6356	C2	2019-4b
														11.2754	0.5526		56.3768	C3	2019-4b
														7.38773	0.3748		36.9387	P1	2019-4b
														5.89721	0.3025		29.486	P2	2019-4b
														9.27176	0.46285		46.3588	P3	2019-4b
														6.99228	0.35585		34.9614	P4	2019-4b
