# Supplementary material for: Bacterial–fungal interactions in the neonatal gut influence asthma outcomes later in life
Source: eLife. 2021 Apr 20;10:e67740. doi: 10.7554/eLife.67740 (PMC8075585; doi:10.7554/eLife.67740)
Supplement: Figure 3—source data 1. [file elife-67740-fig3-data1.xlsx]

## Sheet: Plating
Mouse	Dam	Sex	Pre SI	Post SI	Weight	CFU/100ul	Dilution	Total CFU/g	Pre cecum	Post cecum	Weight	CFU/100ul	Dilution	Total CFU/g	Pre colon	Post colon	Weight	CFU/100ul	Dilution	Total CFU/g
C1	189736	F	2.2122	2.3423	0.1301	0	neat	0	2.2122	2.2564	0.0442	0		0	2.1987	2.2496	0.0509	0	neat	0
C4	189740	M	2.203	2.4245	0.2215	0	neat	0	2.2111	2.2774	0.0663	0		0	2.2088	2.2677	0.0589	0	neat	0
C9	189742	M	2.1173	2.3292	0.2119	0	neat	0	2.2011	2.2425	0.0414	0		0	2.2187	2.2644	0.0457	0	neat	0
C13	189739	M	2.2071	2.4582	0.2511	0	neat	0	2.2075	2.2565	0.049	0		0	2.2167	2.2916	0.0749	0	neat	0
P1	189737	M	2.2081	2.4958	0.2877	7	neat	243.309	2.2065	2.2656	0.0591	45	neat	7614.21	2.1972	2.2578	0.0606	13	neat	2145.21
P2	189737	F	2.2138	2.4466	0.2328	2	neat	85.9107	2.2046	2.256	0.0514	230	neat	44747.1	2.1986	2.2506	0.052	194	neat	37307.7
P7	189735	M	2.2099	2.4869	0.277	10	neat	361.011	2.219	2.259	0.04	12	neat	3000	2.2054	2.2629	0.0575	29	10^-2	504348
P10	189739	M	2.2105	2.4737	0.2632	23	neat	873.86	2.2067	2.2596	0.0529	451	neat	85255.2	2.2086	2.265	0.0564	196	neat	34751.8
P14	189741	M	2.2059	2.4219	0.216	31	neat	1435.19	2.2009	2.2448	0.0439	13	neat	2961.28	2.2093	2.2592	0.0499	37	neat	7414.83
Dam C1	fecal		2.1923	2.269	0.0767	0	neat	0			0	0					0	0
Dam C2	fecal		2.2099	2.3014	0.0915	0	neat	0			0	0					0	0
Dam C3	fecal		2.2095	2.2489	0.0394	0	neat	0			0	0					0	0
Dam C4	fecal		2.1966	2.2828	0.0862	0	neat	0			0	0					0	0
Damp P1	fecal		2.2072	2.2594	0.0522	11	neat	2107.28			0						0
Damp P2	fecal		2.2134	2.2485	0.0351	25	neat	7122.51			0						0
Damp P3	fecal		2.2066	2.3805	0.1739	80	neat	4600.35			0						0
Damp P4	fecal		2.2125	2.2654	0.0529	267	10^-1	504726			0						0
*48hr cfu counts
