# Supplementary material for: Bacterial–fungal interactions in the neonatal gut influence asthma outcomes later in life
Source: eLife. 2021 Apr 20;10:e67740. doi: 10.7554/eLife.67740 (PMC8075585; doi:10.7554/eLife.67740)
Supplement: Figure 3—source data 2. [file elife-67740-fig3-data2.xlsx]

## Sheet: Sheet2
Application: Tecan i-control				Tecan i-control , 1.7.1.7
Device: infinite 200				Serial number: 906002512				Serial number of connected stacker:
Firmware: V_2.12_04/10_InfiniTe (Apr 26 2010/11.30.08)				MAI, V_2.12_04/10_InfiniTe (Apr 26 2010/11.30.08)
Date:	2019-12-09
Time:	5:03:16 PM
System				MSL-SHARED-0015
User				MSL-SHARED-0015\Tecan
Plate				Corning 96 Flat Bottom clear Polystyrol [COR96fc UV transparent.pdfx]
Plate-ID (Stacker)
Label: Label1
Mode				Absorbance
Wavelength				450	nm
Bandwidth				9	nm
Number of Flashes				25
Settle Time				0	ms
Part of Plate				A1-G6; H1-H2
Start Time:	12/9/2019 5:03:16 PM
	Temperature: 23.1 °C
<>	1	2	3	4	5	6										exp_2019-03			exp_2019-4
A	0.3397	0.3112	0.3316	0.3266	0.3308	0.3308		0.32545	0.3291	0.3308		-0.0146	-0.01095	-0.00925		C3	0	0	C1	0.3308	0.968762
B	0.3338	0.3361	0.3198	0.4232	0.342	0.3633		0.33495	0.3715	0.35265		-0.0051	0.03145	0.0126		C4	0	0	C2	0.35265	1.03275
C	0.3789	0.3473	0.3926	0.4814	0.3745	0.3074		0.3631	0.437	0.34095		0.02305	0.09695	0.0009		C5	0.02305	1.82069	C3	0.34095	0.998487
D	0.3285	0.3353	0.3753	0.3919	0.3258	0.3014		0.3319	0.3836	0.3136		-0.00815	0.04355	-0.02645		C6	0	0	P1	0.3136	0.918391
E	0.3766	0.384	0.3328	0.3137	0.314	0.2889		0.3803	0.32325	0.30145		0.04025	-0.0168	-0.0386		C7	0.04025	3.17931	P2	0.30145	0.882809
F	0.3528	0.3344	0.328	0.3162	0.3188	0.3049		0.3436	0.3221	0.31185		0.00355001	-0.01795	-0.0282		C8	0.00355001	0.280411	P3	0.31185	0.913266
G	0.3837	0.3408	0.3414	0.3387	0.3466	0.3127		0.36225	0.34005	0.32965		0.0222		-0.0104		P2	0.0222	1.75355	P4	0.32965	0.965394
H	0.3512	0.3308						0.341				0.000950009				P3	0.000950009	0.0750402		0.341467
									0.34005							P5	0	0		0.341467
																P6	0.03145	2.4842
																P7	0.09695	7.65798
End Time:	12/9/2019 5:03:54 PM															P8	0.04355	3.43997
																P9	0	0
																P10	0	0
																	0.01266
																	0.01266
Label: Label2
Mode				Absorbance
Wavelength				550	nm
Bandwidth				9	nm
Number of Flashes				25
Settle Time				0	ms
Part of Plate				A1-G6; H1-H2
Start Time:	12/9/2019 5:03:59 PM
	Temperature: 23.2 °C
<>	1	2	3	4	5	6
A	0.0364	0.0534	0.0563	0.0577	0.0663	0.0703
B	0.0598	0.0669	0.0628	0.1265	0.0992	0.0801
C	0.0866	0.0543	0.0578	0.1202	0.1086	0.0576
D	0.0612	0.0546	0.0777	0.1144	0.0804	0.0557
E	0.0695	0.0682	0.0662	0.0515	0.062	0.0528
F	0.0564	0.0627	0.0509	0.0522	0.0697	0.0693
G	0.0733	0.0566	0.0513	0.0492	0.0823	0.066
H	0.0538	0.0558
End Time:	12/9/2019 5:04:37 PM
