# Supplementary material for: Bacterial–fungal interactions in the neonatal gut influence asthma outcomes later in life
Source: eLife. 2021 Apr 20;10:e67740. doi: 10.7554/eLife.67740 (PMC8075585; doi:10.7554/eLife.67740)
Supplement: Figure 3—source data 3. [file elife-67740-fig3-data3.xlsx]

## Sheet: CFUs
Animal ID	Sex	Colon pre	post	Weight	CFU	Diln	CFU/g	Cecum pre	post	Weight	CFU	Diln	CFU/g	SI pre	Post	Weight	CFU	Diln	CFU/g
C1	M	2.6947	2.7066	0.0119	0		0	2.6863	2.7286	0.0423	0		0	2.6933	2.8765	0.1832	0		0
C2	F	2.6924	2.6989	0.0065	0		0	2.7028	2.7555	0.0527	0		0	2.7238	2.9703	0.2465	0		0
C3	F	2.7036	2.7126	0.009	0		0	2.7206	2.7742	0.0536	0		0	2.7081	2.9189	0.2108	0		0
C4	M	2.6999	2.7138	0.0139	0		0	2.6744	2.7214	0.047	0		0	2.6911	2.8742	0.1831	0		0
C5	F	2.715	2.7394	0.0244	0		0	2.7032	2.7426	0.0394	0		0	2.7163	2.9485	0.2322	0		0
C6	F	2.706	2.7227	0.0167	0		0	2.6996	2.7595	0.0599	0		0	2.6542	2.8562	0.202	0		0
P1	M	2.7114	2.7292	0.0178	2	neat	1123.6	2.7109	2.7846	0.0737	1	neat	135.685	2.7215	2.8962	0.1747	0		0
P2	M	2.7164	2.7333	0.0169	393	neat	232544	2.7051	2.7642	0.0591	57	-1	96446.7	2.6953	2.9063	0.211	136	neat	6445.5
P3	F	2.7208	2.7352	0.0144	107	neat	74305.6	2.6892	2.7355	0.0463	25	neat	5399.57	2.7088	2.9352	0.2264	1	neat	44.1696
P4	M	2.7126	2.7322	0.0196	90	neat	45918.4	2.6862	2.7605	0.0743	70	neat	9421.27	2.7172	3.0238	0.3066	6	neat	195.695
P5	F	2.7033	2.715	0.0117	69	neat	58974.4	2.7053	2.767	0.0617	58	neat	9400.32	2.6982	2.9823	0.2841	7	neat	246.392
P6	F	2.7017	2.7251	0.0234	100	neat	42735	2.6968	2.7429	0.0461	18	neat	3904.56	2.7029	2.9372	0.2343	20	neat	853.606
Dam P1		2.7062	2.8016	0.0954	3		314.465
Dam p2		2.7053	2.783	0.0777	65		8365.51
