# Supplementary material for: Bacterial–fungal interactions in the neonatal gut influence asthma outcomes later in life
Source: eLife. 2021 Apr 20;10:e67740. doi: 10.7554/eLife.67740 (PMC8075585; doi:10.7554/eLife.67740)
Supplement: Figure 3—source data 4. [file elife-67740-fig3-data4.xlsx]

## Sheet: CFUs
Animal ID	Fecal day 5 pre	post	Weight	CFU	Diln	CFU/g	Fecal day 6 pre	post	Weight	CFU	Diln	CFU/g	Colon pre	post	Weight	CFU	Diln	CFU/g	Cecum pre	post	Weight	CFU	Diln	CFU/g	SI pre	Post	Weight	CFU	Diln	CFU/g
NaCl 1	2.7057	2.7355	0.0298	19	-2	637584	2.7082	2.7256	0.0174	27	-1	155172	2.7097	3.0723	0.3626	28	-2	77220.1	2.7035	3.8886	1.1851	53	-2	44722	2.7167	3.5164	0.7997	166	-2	207578
NaCl 2	2.704	2.7471	0.0431	116	-2	2.69142e+06	2.7138	2.7483	0.0345	67	-2	1.94203e+06	2.7004	2.9734	0.273	203	-2	743590	2.689	3.2079	0.5189	211	-2	406629	2.7162	3.4533	0.7371	63	-2	85470.1
NaCl 3	2.7093	2.7465	0.0372	169	-2	4.54301e+06	2.7137	2.7503	0.0366	73	-2	1.99454e+06	2.6949	3.1222	0.4273	255	-2	596770	2.6997	3.871	1.1713	87	-3	742764	2.7154	3.3403	0.6249	239	-2	382461
NaCl 4	2.7085	2.7368	0.0283	199	-2	7.0318e+06	2.7052	2.7402	0.035	65	-2	1.85714e+06	2.6909	2.8926	0.2017	174	-2	862667	2.6847	3.0547	0.37	138	-2	372973	2.6971	3.347	0.6499	81	-2	124635
NaCl 5	2.7135	2.7503	0.0368	91	-2	2.47283e+06	2.7079	2.7217	0.0138	32	-2	2.31884e+06	2.7157	3.0848	0.3691	185	-2	501219	2.6901	3.8354	1.1453	196	-2	171134	2.6997	3.2886	0.5889	207	-2	351503
NaCl 6	2.7175	2.7383	0.0208	29	-3	1.39423e+07	2.7068	2.7347	0.0279	114	-2	4.08602e+06	2.6981	2.8369	0.1388	40	-3	2.88184e+06	2.6838	2.9663	0.2825	126	-2	446018	2.7186	3.2351	0.5165	207	-2	400774
NaCl 7	2.7086	2.7487	0.0401	165	-2	4.11471e+06	2.7033	2.759	0.0557	130	-2	2.33393e+06	2.7081	3.1005	0.3924	220	-2	560652	2.7098	2.8776	0.1678	66	-3	3.93325e+06	2.6986	3.4562	0.7576	540	-2	712777
NaCl 8	2.708	2.7427	0.0347	35	-3	1.00865e+07	2.6993	2.7426	0.0433	203	-2	4.68822e+06	2.7072	2.972	0.2648	93	-3	3.51208e+06	2.6951	2.9853	0.2902	33	-3	1.13715e+06	2.7093	3.5699	0.8606	469	-2	544969
SCFA 1	2.7109	2.7333	0.0224	4	-1	17857.1	2.7026	2.7396	0.037	1	-1	2702.7	2.7178	2.9986	0.2808	5	neat	178.063	2.713	3.3424	0.6294	11	neat	174.77	2.6724	2.936	0.2636	12	neat	455.235
SCFA 2	2.7022	2.7203	0.0181	2	-1	11049.7	2.7033	2.7468	0.0435	1	-1	2298.85	2.7121	2.9523	0.2402	23	neat	957.535	2.7235	3.0498	0.3263	28	neat	858.106	2.7156	3.0097	0.2941	19	neat	646.039
SCFA 3	2.7018	2.7435	0.0417	97	-2	2.32614e+06	2.7104	2.7473	0.0369	92	-2	2.49322e+06	2.6956	3.023	0.3274	204	-2	623091	2.705	3.7051	1.0001	100	-3	999900	2.6912	3.1211	0.4299	268	-2	623401
SCFA 4	2.7213	2.7475	0.0262	130	-1	496183	2.6964	2.7243	0.0279	107	-1	383513	2.607	2.9016	0.2946	36	-2	122200	2.7009	3.0265	0.3256	165	-1	50675.7	2.701	3.0775	0.3765	325	neat	8632.14
SCFA 5	2.712	2.7336	0.0216	23	-3	1.06481e+07	2.6973	2.7125	0.0152	112	-2	7.36842e+06	2.6999	3.0284	0.3285	165	-3	5.02283e+06	2.7096	3.7715	1.0619	404	-3	3.8045e+06	2.7071	3.208	0.5009	210	-2	419245
SCFA 6	2.7063	2.7264	0.0201	124	-2	6.16915e+06	2.7023	2.7254	0.0231	69	-2	2.98701e+06	2.71	2.809	0.099	251	-2	2.53535e+06	2.6998	3.0173	0.3175	48	-2	151181	2.6889	3.0355	0.3466	39	-2	112522
SCFA 7	2.7059	2.7282	0.0223	69	-2	3.09417e+06	2.6982	2.7403	0.0421	73	-2	1.73397e+06	2.6999	2.898	0.1981	199	-2	1.00454e+06	2.7111	3.929	1.2179	30	-3	246326	2.7236	3.1921	0.4685	109	-2	232657
SCFA 8	2.6933	2.6996	0.0063	57	-2	9.04762e+06	2.7076	2.7513	0.0437	194	-2	4.43936e+06	2.7421	3.0827	0.3406	122	-3	3.58191e+06	2.692	3.1092	0.4172	108	-3	2.58869e+06	2.7259	3.1846	0.4587	509	-2	1.10966e+06

## Sheet: Weights_fecal
Mouse	Day 0 pre	post	weight	Day 1 pre	post	weight	Day 3 pre	post	weight	Day5 pre	post	weight	Day 6 pre	post	weight	Cecal contents post
NaCl 1	0.9472	0.969	0.0218	1.0025	1.021	0.0185	0.937	0.9645	0.0275	0.9579	0.9796	0.0217	0.9581	0.9866	0.0285
NaCl 2	0.9366	0.9755	0.0389	0.939	0.9592	0.0202	0.9565	0.977	0.0205	0.9604	0.9843	0.0239	1.0073	1.0194	0.0121	2.5535
NaCl 3	0.9827	1.0196	0.0369	0.9483	0.9817	0.0334	0.9897	1.0138	0.0241	0.9404	0.9695	0.0291	1.0072	1.035	0.0278
NaCl 4	1.0073	1.0214	0.0141	0.9516	0.9736	0.022	0.9878	1.0344	0.0466	0.9486	0.9639	0.0153	0.9276	0.973	0.0454	1.2867
NaCl 5	0.9577	0.9775	0.0198	0.9578	0.9755	0.0177	0.947	0.9849	0.0379	0.937	0.9641	0.0271	0.9486	0.9649	0.0163
NaCl 6	0.9807	1.0003	0.0196	0.9259	0.9671	0.0412	1.007	1.0332	0.0262	0.9905	1.0173	0.0268	0.937	0.9793	0.0423	1.5574
NaCl 7	0.9517	0.9912	0.0395	1.0669	1.0951	0.0282	1.0091	1.0202	0.0111	0.9275	0.9593	0.0318	0.9522	1.015	0.0628
NaCl 8	0.927	0.9512	0.0242	0.9521	0.9592	0.0071	1.0068	1.0231	0.0163	1.0021	1.0346	0.0325	0.9392	0.9715	0.0323	1.9417
SCFA 1	0.9482	0.9765	0.0283	0.9403	0.9761	0.0358	0.9891	1.0236	0.0345	0.9601	0.9781	0.018	1.0025	1.0495	0.047
SCFA 2	1.0186	1.0396	0.021	0.9579	1.0037	0.0458	1.0101	1.0463	0.0362	0.9879	1.0054	0.0175	0.9486	0.9824	0.0338	1.3368
SCFA 3	0.9387	0.9684	0.0297	0.9879	0.9824	-0.0055	1.0058	1.0425	0.0367	1.0019	1.0279	0.026	0.9826	1.0349	0.0523
SCFA 4	1.0099	1.0726	0.0627	0.9578	0.9809	0.0231	0.9598	0.9926	0.0328	0.9278	0.9757	0.0479	1.0669	1.1316	0.0647	1.4908
SCFA 5	0.948	0.967	0.019	1.0019	1.0246	0.0227	1.0101	1.0305	0.0204	0.9472	0.9624	0.0152	1.0042		-1.0042
SCFA 6	0.9449	0.9697	0.0248	0.9369	0.9625	0.0256	0.96	0.9693	0.0093	0.9776		-0.9776	1.0044	1.0234	0.019	1.7859
SCFA 7	1.0029	1.0266	0.0237	0.9826	1.0098	0.0272	0.9515	0.9669	0.0154	1.0184	1.0399	0.0215	0.9519	0.9778	0.0259
SCFA 8	0.9404	0.9622	0.0218	0.9262	0.9415	0.0153	0.9368	0.9689	0.0321	0.959	0.9955	0.0365	0.982	1.0077	0.0257	1.965
