# Supplementary material for: Bacterial–fungal interactions in the neonatal gut influence asthma outcomes later in life
Source: eLife. 2021 Apr 20;10:e67740. doi: 10.7554/eLife.67740 (PMC8075585; doi:10.7554/eLife.67740)
Supplement: Figure 4—source data 1. [file elife-67740-fig4-data1.xlsx]

## Sheet: Sheet1
Culture condition	Replicate	Count technical replicate 1	Count technical replicate 2	Dilution factor	Total attatched
NaCl	1	22	20	10^-1	21000				21833.3
NaCl	2	24	25	10^-1	24500
NaCl	3	18	22	10^-1	20000
YPD	1	14	15	10^-1	14500				15500
YPD	2	15	14	10^-1	14500
YPD	3	23	12	10^-1	17500
Acetate	1	7	9	10^-1	8000				6500
Acetate	2	6	5	10^-1	5500
Acetate	3	4	8	10^-1	6000
Butyrate	1	0	1	10^-1	500	153	neat	1530	2833.33	2526.67
Butyrate	2	3	5	10^-1	4000	261	neat	2610
Butyrate	3	3	5	10^-1	4000	344	neat	3440
Propionate	1	3	5	10^-1	4000	501	neat	5010	3833.33	5956.67
Propionate	2	7	2	10^-1	4500	619	neat	6190
Propionate	3	3	3	10^-1	3000	667	neat	6670
