# Supplementary material for: Bacterial–fungal interactions in the neonatal gut influence asthma outcomes later in life
Source: eLife. 2021 Apr 20;10:e67740. doi: 10.7554/eLife.67740 (PMC8075585; doi:10.7554/eLife.67740)
Supplement: Figure 4—source data 2. [file elife-67740-fig4-data2.xlsx]

## Sheet: Sheet1
Culture condition	Replicate	Count technical replicate 1	Count technical replicate 2	Dilution factor	Total attatched
NaCl	1	5	11	10^-1	8000				14333.3
NaCl	2	17	14	10^-1	15500
NaCl	3	19	20	10^-1	19500
YPD	1	12	12	10^-1	12000				22166.7
YPD	2	31	28	10^-1	29500
YPD	3	25		10^-1	25000
Acetate	1	0	2	10^-1	1000	223	neat	2230	3833.33	5196.67
Acetate	2	2	2	10^-1	2000	617	neat	6170
Acetate	3	4	13	10^-1	8500	719	neat	7190
Butyrate	1	0	1	10^-1	500	163	neat	1630	1666.67	3460
Butyrate	2	2	2	10^-1	2000	408	neat	4080
Butyrate	3	2	3	10^-1	2500	467	neat	4670
Propionate	1	2	2	10^-1	2000	155	neat	1550	1500	1720
Propionate	2	2	2	10^-1	2000	176	neat	1760
Propionate	3	0	1	10^-1	500	185	neat	1850
NaCl inoculum		4	7	10^-3	550000
YPD inoculum		10	6	10^-3	800000
Acetate inoculum		9	6	10^-3	750000
Butyrate inoculum		7	6	10^-3	650000
Propionate inoculum		6	7	10^-3	650000
