# Supplementary material for: Bacterial–fungal interactions in the neonatal gut influence asthma outcomes later in life
Source: eLife. 2021 Apr 20;10:e67740. doi: 10.7554/eLife.67740 (PMC8075585; doi:10.7554/eLife.67740)
Supplement: Figure 4—source data 3. [file elife-67740-fig4-data3.xlsx]

## Sheet: Sheet1
Culture condition	Replicate	Count technical replicate 1	Count technical replicate 2	Dilution factor	Total attatched
NaCl	1	4	5	10^-1	4500	696	neat	6960	11320
NaCl	2	8	13	10^-1	10500
NaCl	3	17	16	10^-1	16500
YPD	1	12	4	10^-1	8000				12333.3
YPD	2	19	11	10^-1	15000
YPD	3	12	16	10^-1	14000
Acetate	1	4	5	10^-1	4500	436	neat	4360	6500	8053.33
Acetate	2	9	5	10^-1	7000	800	neat	8000
Acetate	3	9	7	10^-1	8000	1180	neat	11800
Butyrate	1	0	2	10^-1	1000	209	neat	2090	1500	3043.33
Butyrate	2	1	3	10^-1	2000	488	neat	4880
Butyrate	3	2	1	10^-1	1500	216	neat	2160
Propionate	1	2	1	10^-1	1500	129	neat	1290	1333.33	1690
Propionate	2	3	0	10^-1	1500	203	neat	2030
Propionate	3	1	1	10^-1	1000	175	neat	1750
NaCl inoculum		12	16	10^-3	1400000
YPD inoculum		13	11	10^-3	1200000
Acetate inoculum		12	15	10^-3	1350000
Butyrate inoculum		14	13	10^-3	1350000
Propionate inoculum		10	12	10^-3	1100000
