# Supplementary material for: Bacterial–fungal interactions in the neonatal gut influence asthma outcomes later in life
Source: eLife. 2021 Apr 20;10:e67740. doi: 10.7554/eLife.67740 (PMC8075585; doi:10.7554/eLife.67740)
Supplement: Figure 4—source data 4. [file elife-67740-fig4-data4.xlsx]

## Sheet: Plate 1 - Sheet1
Software Version	3.05.11
Experiment File Path:	C:\Users\Plate Reader\Documents\Roz\Pichia_GC_062519.xpt
Protocol File Path:
Plate Number	Plate 1
Date	2019-06-25
Time	10:19:20
Reader Type:	Synergy H1
Reader Serial Number:	1905217
Reading Type	Reader
Procedure Details
Plate Type	96 WELL PLATE (Use plate lid)
Eject plate on completion
Set Temperature	Setpoint 37°C
	Preheat before moving to next step
Start Kinetic	Runtime 72:00:00 (HH:MM:SS), Interval 0:15:00, 289 Reads
Shake	Orbital: 0:10 (MM:SS)
	Frequency: 282 cpm (3 mm)
Read	Absorbance Endpoint
	Full Plate
	Wavelengths: 600
	Read Speed: Normal, Delay: 100 msec, Measurements/Data Point: 8
End Kinetic
600
	Time	T° 600	A1	A2	A3	A4	A5	A6	A7	A8	A9	A10	A11	A12	B1	B2	B3	B4	B5	B6	B7	B8	B9	B10	B11	B12	C1	C2	C3	C4	C5	C6	C7	C8	C9	C10	C11	C12	D1	D2	D3	D4	D5	D6	D7	D8	D9	D10	D11
	00:00:12	36.7	0.134	0.136	0.133	0.094	0.136	0.135	0.132	0.096	0.128	0.13	0.126	0.092	0.131	0.134	0.14	0.094	0.131	0.127	0.489	0.093	0.131	0.128	0.127	0.092	0.133	0.132	0.147	0.255	0.13	0.13	0.207	0.095	0.135	0.147	0.13	0.092	0.135	0.134	0.139	0.096	0.135	0.124	0.12	0.094	0.127	0.13	0.126
	00:15:12	37	0.134	0.138	0.134	0.094	0.137	0.136	0.133	0.097	0.128	0.131	0.127	0.092	0.131	0.135	0.14	0.093	0.132	0.127	0.535	0.093	0.131	0.127	0.127	0.092	0.132	0.132	0.148	0.218	0.13	0.131	0.185	0.094	0.134	0.148	0.13	0.092	0.132	0.124	0.133	0.096	0.127	0.121	0.118	0.094	0.123	0.127	0.126
	00:30:12	37	0.135	0.139	0.135	0.094	0.138	0.138	0.134	0.096	0.129	0.132	0.128	0.092	0.133	0.137	0.141	0.093	0.133	0.127	0.57	0.093	0.132	0.128	0.128	0.092	0.132	0.132	0.149	0.19	0.131	0.132	0.18	0.094	0.137	0.152	0.132	0.092	0.131	0.127	0.13	0.096	0.133	0.127	0.123	0.093	0.126	0.13	0.13
	00:45:12	37	0.135	0.141	0.138	0.093	0.139	0.139	0.135	0.096	0.131	0.133	0.129	0.092	0.133	0.139	0.142	0.093	0.135	0.129	0.584	0.093	0.134	0.13	0.13	0.092	0.132	0.133	0.152	0.174	0.132	0.134	0.181	0.094	0.139	0.153	0.132	0.092	0.13	0.127	0.13	0.096	0.134	0.13	0.126	0.093	0.13	0.133	0.132
	01:00:12	37	0.135	0.141	0.138	0.093	0.14	0.141	0.137	0.097	0.132	0.135	0.13	0.092	0.134	0.14	0.143	0.093	0.137	0.13	0.591	0.093	0.135	0.132	0.131	0.092	0.135	0.134	0.154	0.166	0.134	0.136	0.182	0.094	0.14	0.155	0.132	0.092	0.133	0.126	0.131	0.096	0.137	0.131	0.126	0.093	0.129	0.131	0.131
	01:15:12	37	0.137	0.142	0.14	0.093	0.141	0.141	0.138	0.097	0.134	0.134	0.131	0.092	0.137	0.141	0.145	0.093	0.139	0.132	0.142	0.093	0.136	0.133	0.132	0.092	0.137	0.137	0.156	0.162	0.136	0.138	0.181	0.094	0.141	0.157	0.134	0.092	0.133	0.128	0.132	0.095	0.134	0.131	0.128	0.093	0.129	0.13	0.13
	01:30:12	37	0.139	0.144	0.142	0.093	0.142	0.143	0.14	0.097	0.135	0.135	0.131	0.092	0.139	0.143	0.148	0.093	0.141	0.133	0.144	0.093	0.137	0.134	0.133	0.092	0.14	0.139	0.157	0.159	0.138	0.139	0.183	0.094	0.142	0.159	0.136	0.092	0.136	0.131	0.135	0.096	0.136	0.131	0.13	0.093	0.133	0.132	0.134
	01:45:12	37	0.141	0.145	0.145	0.093	0.144	0.145	0.141	0.097	0.136	0.135	0.132	0.093	0.141	0.146	0.151	0.093	0.143	0.136	0.147	0.093	0.139	0.135	0.134	0.092	0.143	0.14	0.16	0.158	0.141	0.142	0.187	0.094	0.145	0.161	0.138	0.092	0.138	0.134	0.137	0.096	0.138	0.133	0.133	0.093	0.135	0.135	0.136
	02:00:12	36.9	0.145	0.148	0.147	0.093	0.146	0.147	0.144	0.097	0.137	0.136	0.134	0.092	0.145	0.149	0.154	0.093	0.146	0.138	0.15	0.093	0.141	0.137	0.136	0.092	0.146	0.144	0.163	0.156	0.144	0.145	0.191	0.094	0.147	0.163	0.14	0.092	0.141	0.136	0.14	0.096	0.14	0.135	0.136	0.093	0.138	0.138	0.138
	02:15:12	37	0.148	0.152	0.151	0.093	0.149	0.151	0.147	0.097	0.137	0.137	0.135	0.092	0.148	0.152	0.158	0.093	0.149	0.142	0.155	0.093	0.143	0.139	0.138	0.092	0.15	0.148	0.167	0.157	0.147	0.149	0.196	0.094	0.15	0.167	0.143	0.092	0.145	0.14	0.143	0.096	0.143	0.14	0.139	0.093	0.141	0.142	0.142
	02:30:12	37	0.152	0.155	0.155	0.093	0.153	0.154	0.15	0.097	0.138	0.139	0.136	0.092	0.153	0.157	0.164	0.093	0.154	0.146	0.16	0.093	0.146	0.142	0.141	0.092	0.155	0.152	0.173	0.156	0.152	0.153	0.202	0.094	0.154	0.171	0.147	0.092	0.149	0.144	0.147	0.096	0.147	0.143	0.143	0.093	0.144	0.146	0.146
	02:45:12	37	0.158	0.16	0.16	0.093	0.157	0.159	0.155	0.097	0.141	0.141	0.138	0.093	0.16	0.164	0.171	0.093	0.16	0.15	0.166	0.093	0.149	0.145	0.145	0.092	0.161	0.159	0.179	0.157	0.158	0.159	0.21	0.094	0.16	0.177	0.151	0.092	0.155	0.149	0.153	0.096	0.152	0.148	0.148	0.093	0.149	0.151	0.151
	03:00:12	37	0.164	0.166	0.166	0.093	0.162	0.165	0.161	0.097	0.143	0.142	0.14	0.092	0.167	0.171	0.179	0.093	0.167	0.157	0.173	0.093	0.153	0.148	0.148	0.092	0.168	0.166	0.188	0.155	0.165	0.166	0.219	0.094	0.165	0.182	0.157	0.092	0.162	0.156	0.159	0.096	0.159	0.154	0.154	0.093	0.155	0.157	0.157
	03:15:12	37	0.172	0.173	0.174	0.093	0.168	0.171	0.167	0.097	0.144	0.144	0.142	0.093	0.176	0.18	0.188	0.093	0.176	0.164	0.182	0.093	0.158	0.153	0.153	0.092	0.177	0.174	0.197	0.156	0.174	0.174	0.231	0.094	0.173	0.19	0.163	0.092	0.17	0.163	0.167	0.096	0.166	0.162	0.163	0.093	0.162	0.165	0.165
	03:30:12	37	0.182	0.182	0.183	0.093	0.176	0.179	0.175	0.097	0.147	0.147	0.144	0.092	0.188	0.19	0.2	0.093	0.186	0.172	0.193	0.093	0.163	0.158	0.158	0.092	0.188	0.185	0.209	0.155	0.184	0.185	0.244	0.094	0.181	0.199	0.171	0.092	0.18	0.172	0.176	0.096	0.174	0.171	0.172	0.093	0.172	0.174	0.175
	03:45:12	37	0.193	0.193	0.194	0.093	0.184	0.189	0.184	0.096	0.148	0.149	0.146	0.092	0.201	0.203	0.214	0.093	0.198	0.182	0.206	0.093	0.17	0.164	0.164	0.092	0.201	0.198	0.223	0.156	0.197	0.197	0.261	0.094	0.19	0.209	0.179	0.092	0.192	0.183	0.187	0.095	0.185	0.181	0.183	0.093	0.182	0.185	0.186
	04:00:12	37	0.207	0.205	0.208	0.093	0.195	0.2	0.196	0.096	0.151	0.152	0.149	0.092	0.217	0.217	0.23	0.093	0.213	0.193	0.221	0.093	0.177	0.172	0.171	0.092	0.216	0.212	0.239	0.156	0.211	0.211	0.28	0.094	0.201	0.221	0.189	0.092	0.206	0.196	0.2	0.096	0.198	0.193	0.196	0.093	0.195	0.198	0.199
	04:15:12	36.9	0.222	0.22	0.224	0.093	0.208	0.214	0.209	0.096	0.155	0.156	0.153	0.093	0.236	0.233	0.249	0.093	0.23	0.207	0.238	0.093	0.185	0.179	0.18	0.092	0.234	0.229	0.257	0.155	0.228	0.228	0.302	0.094	0.213	0.234	0.201	0.092	0.223	0.211	0.215	0.096	0.212	0.207	0.211	0.093	0.21	0.213	0.214
	04:30:12	37	0.24	0.237	0.242	0.093	0.223	0.23	0.225	0.096	0.159	0.16	0.157	0.093	0.258	0.253	0.271	0.093	0.25	0.224	0.259	0.093	0.195	0.189	0.189	0.092	0.254	0.248	0.279	0.156	0.248	0.247	0.327	0.094	0.227	0.249	0.215	0.092	0.243	0.229	0.233	0.096	0.23	0.225	0.229	0.093	0.227	0.231	0.231
	04:45:12	37	0.262	0.257	0.264	0.093	0.241	0.248	0.244	0.096	0.163	0.164	0.162	0.093	0.282	0.275	0.296	0.093	0.273	0.243	0.283	0.093	0.206	0.2	0.2	0.092	0.278	0.27	0.303	0.156	0.272	0.269	0.355	0.094	0.243	0.266	0.23	0.092	0.265	0.249	0.254	0.096	0.25	0.244	0.249	0.093	0.246	0.25	0.252
	05:00:12	37	0.287	0.281	0.287	0.093	0.261	0.269	0.265	0.096	0.169	0.17	0.167	0.092	0.311	0.3	0.325	0.093	0.299	0.265	0.31	0.093	0.218	0.211	0.212	0.092	0.305	0.297	0.331	0.155	0.299	0.295	0.388	0.094	0.261	0.285	0.247	0.092	0.291	0.273	0.277	0.096	0.273	0.267	0.272	0.093	0.269	0.274	0.275
	05:15:12	37	0.316	0.308	0.314	0.093	0.283	0.292	0.289	0.096	0.174	0.175	0.172	0.092	0.343	0.328	0.357	0.093	0.328	0.29	0.341	0.093	0.231	0.225	0.225	0.092	0.337	0.325	0.363	0.155	0.329	0.325	0.425	0.094	0.28	0.306	0.266	0.092	0.32	0.299	0.303	0.095	0.298	0.293	0.299	0.093	0.295	0.301	0.301
	05:30:12	37	0.348	0.339	0.345	0.093	0.31	0.32	0.316	0.096	0.18	0.182	0.178	0.092	0.379	0.359	0.392	0.093	0.361	0.32	0.376	0.093	0.247	0.239	0.239	0.092	0.373	0.357	0.398	0.156	0.364	0.359	0.466	0.094	0.303	0.329	0.287	0.092	0.354	0.329	0.333	0.096	0.328	0.323	0.328	0.093	0.323	0.331	0.329
	05:45:12	37.1	0.383	0.372	0.379	0.093	0.34	0.35	0.348	0.096	0.188	0.189	0.185	0.092	0.419	0.395	0.431	0.093	0.398	0.353	0.415	0.093	0.264	0.256	0.255	0.092	0.411	0.392	0.436	0.156	0.402	0.396	0.511	0.094	0.328	0.354	0.309	0.092	0.391	0.364	0.367	0.095	0.361	0.356	0.36	0.093	0.355	0.362	0.363
	06:00:12	37	0.423	0.409	0.416	0.093	0.373	0.386	0.383	0.096	0.195	0.197	0.193	0.092	0.462	0.434	0.475	0.093	0.439	0.39	0.456	0.093	0.282	0.275	0.273	0.092	0.452	0.431	0.476	0.157	0.445	0.438	0.56	0.094	0.355	0.382	0.334	0.092	0.432	0.4	0.403	0.096	0.398	0.392	0.397	0.093	0.391	0.4	0.4
	06:15:12	37	0.465	0.45	0.459	0.093	0.409	0.424	0.421	0.096	0.204	0.205	0.201	0.092	0.508	0.476	0.52	0.092	0.483	0.43	0.503	0.093	0.303	0.294	0.292	0.092	0.497	0.472	0.519	0.156	0.491	0.483	0.613	0.094	0.385	0.412	0.36	0.092	0.476	0.442	0.444	0.095	0.437	0.431	0.434	0.093	0.431	0.44	0.441
	06:30:12	37	0.513	0.495	0.505	0.093	0.45	0.467	0.462	0.096	0.213	0.215	0.211	0.092	0.556	0.52	0.568	0.093	0.528	0.475	0.55	0.093	0.324	0.315	0.313	0.092	0.544	0.516	0.566	0.157	0.54	0.532	0.665	0.094	0.417	0.445	0.39	0.092	0.524	0.487	0.487	0.096	0.481	0.474	0.473	0.093	0.473	0.482	0.484
	06:45:12	37	0.563	0.543	0.554	0.093	0.494	0.509	0.505	0.096	0.222	0.224	0.221	0.092	0.609	0.569	0.618	0.093	0.574	0.519	0.594	0.093	0.347	0.338	0.336	0.092	0.594	0.561	0.615	0.157	0.592	0.582	0.723	0.094	0.451	0.477	0.421	0.092	0.573	0.537	0.534	0.096	0.527	0.52	0.517	0.093	0.517	0.529	0.534
	07:00:12	37	0.616	0.594	0.606	0.093	0.539	0.554	0.551	0.096	0.233	0.234	0.233	0.092	0.662	0.619	0.668	0.093	0.617	0.567	0.639	0.093	0.372	0.363	0.361	0.092	0.646	0.608	0.666	0.157	0.64	0.629	0.777	0.094	0.486	0.511	0.454	0.092	0.627	0.59	0.584	0.096	0.576	0.568	0.559	0.093	0.565	0.575	0.582
	07:15:12	37	0.668	0.646	0.657	0.093	0.587	0.601	0.598	0.096	0.244	0.245	0.245	0.092	0.715	0.669	0.721	0.093	0.661	0.613	0.684	0.093	0.398	0.388	0.386	0.092	0.698	0.656	0.719	0.157	0.69	0.679	0.823	0.094	0.523	0.546	0.487	0.092	0.679	0.643	0.632	0.095	0.627	0.616	0.603	0.093	0.612	0.623	0.632
	07:30:12	37	0.722	0.7	0.711	0.093	0.634	0.646	0.645	0.096	0.256	0.256	0.258	0.092	0.768	0.718	0.774	0.093	0.707	0.659	0.728	0.093	0.425	0.415	0.413	0.092	0.748	0.7	0.771	0.157	0.736	0.724	0.87	0.094	0.56	0.58	0.522	0.092	0.734	0.695	0.682	0.096	0.678	0.662	0.65	0.093	0.66	0.672	0.68
	07:45:12	37	0.768	0.751	0.596	0.093	0.681	0.689	0.691	0.096	0.27	0.269	0.272	0.093	0.816	0.768	0.821	0.093	0.75	0.703	0.771	0.093	0.451	0.444	0.442	0.092	0.795	0.744	0.82	0.157	0.783	0.772	0.915	0.094	0.598	0.617	0.557	0.092	0.786	0.747	0.729	0.096	0.727	0.708	0.695	0.093	0.709	0.721	0.727
	08:00:12	37	0.812	0.8	0.631	0.093	0.726	0.731	0.735	0.096	0.283	0.282	0.286	0.092	0.864	0.813	0.867	0.093	0.792	0.745	0.814	0.093	0.48	0.473	0.472	0.092	0.842	0.787	0.869	0.158	0.826	0.819	0.959	0.094	0.635	0.654	0.593	0.092	0.834	0.798	0.776	0.096	0.774	0.755	0.74	0.094	0.758	0.767	0.776
	08:15:12	37	0.855	0.847	0.669	0.093	0.766	0.772	0.776	0.096	0.297	0.297	0.301	0.092	0.908	0.858	0.911	0.092	0.832	0.786	0.854	0.093	0.508	0.503	0.501	0.092	0.885	0.828	0.912	0.158	0.869	0.865	1.002	0.094	0.671	0.69	0.628	0.092	0.88	0.844	0.824	0.096	0.821	0.8	0.783	0.093	0.799	0.813	0.823
	08:30:12	37	0.894	0.889	0.703	0.093	0.804	0.812	0.816	0.096	0.312	0.312	0.317	0.092	0.951	0.899	0.95	0.092	0.87	0.825	0.893	0.093	0.534	0.533	0.529	0.092	0.927	0.869	0.956	0.159	0.91	0.907	1.042	0.094	0.706	0.722	0.601	0.092	0.926	0.889	0.87	0.096	0.865	0.844	0.824	0.093	0.845	0.859	0.869
	08:45:12	37	0.935	0.932	0.737	0.093	0.844	0.853	0.856	0.096	0.327	0.328	0.333	0.092	0.991	0.938	0.985	0.093	0.908	0.865	0.937	0.093	0.563	0.563	0.559	0.092	0.97	0.907	0.997	0.158	0.952	0.949	1.074	0.094	0.737	0.754	0.632	0.092	0.969	0.931	0.912	0.096	0.906	0.886	0.87	0.093	0.887	0.902	0.913
	09:00:12	37	0.973	0.968	0.771	0.092	0.885	0.889	0.894	0.096	0.343	0.343	0.351	0.092	1.029	0.974	1.019	0.093	0.944	0.902	0.968	0.093	0.591	0.59	0.587	0.092	1.009	0.942	1.035	0.16	0.988	0.987	1.111	0.094	0.768	0.783	0.66	0.092	1.011	0.97	0.952	0.096	0.948	0.927	0.91	0.093	0.931	0.942	0.954
	09:15:12	37	1.01	1.007	0.758	0.093	0.92	0.923	0.931	0.096	0.36	0.361	0.368	0.092	1.067	1.009	1.054	0.093	0.977	0.939	1	0.093	0.618	0.619	0.617	0.092	1.046	0.977	1.071	0.158	1.025	1.02	1.146	0.094	0.796	0.811	0.685	0.092	1.05	1.01	0.99	0.096	0.988	0.968	0.951	0.093	0.973	0.986	0.99
	09:30:12	37.1	1.046	1.046	0.797	0.093	0.954	0.955	0.964	0.096	0.376	0.377	0.386	0.092	1.102	1.042	1.086	0.092	1.007	0.974	1.03	0.093	0.645	0.645	0.644	0.092	1.083	1.008	1.106	0.158	1.058	1.055	1.179	0.094	0.822	0.838	0.71	0.092	1.089	1.048	1.028	0.095	1.029	1.005	0.989	0.093	1.008	1.026	1.028
	09:45:12	37	1.081	1.081	0.843	0.092	0.986	0.985	0.996	0.096	0.392	0.392	0.403	0.092	1.135	1.074	1.115	0.092	1.036	1.006	1.06	0.093	0.669	0.672	0.669	0.092	1.117	1.039	1.139	0.159	1.089	1.085	1.212	0.094	0.847	0.86	0.734	0.092	1.126	1.081	1.063	0.096	1.066	1.043	1.024	0.093	1.044	1.063	1.067
	10:00:12	37	1.113	1.115	0.869	0.093	1.014	1.015	1.025	0.096	0.409	0.41	0.42	0.092	1.167	1.098	1.143	0.093	1.063	1.036	1.085	0.093	0.693	0.696	0.693	0.092	1.15	1.07	1.17	0.16	1.118	1.115	1.241	0.094	0.869	0.881	0.756	0.092	1.161	1.117	1.096	0.096	1.103	1.076	1.059	0.093	1.078	1.098	1.099
	10:15:12	37	1.145	1.149	0.901	0.093	1.041	1.042	1.054	0.096	0.426	0.427	0.438	0.092	1.194	1.126	1.171	0.093	1.087	1.064	1.111	0.093	0.716	0.718	0.718	0.092	1.181	1.099	1.199	0.16	1.146	1.145	1.267	0.094	0.889	0.901	0.775	0.092	1.193	1.149	1.129	0.095	1.137	1.11	1.092	0.093	1.094	1.132	1.135
	10:30:12	37	1.174	1.18	0.943	0.092	1.068	1.065	1.078	0.095	0.443	0.443	0.456	0.092	1.222	1.153	1.196	0.092	1.111	1.09	1.134	0.093	0.736	0.739	0.739	0.092	1.211	1.127	1.225	0.16	1.172	1.171	1.294	0.094	0.907	0.915	0.792	0.092	1.223	1.181	1.158	0.095	1.169	1.142	1.124	0.093	1.131	1.163	1.162
	10:45:12	36.9	1.203	1.209	0.982	0.093	1.087	1.082	1.096	0.096	0.46	0.459	0.474	0.092	1.248	1.072	1.221	0.092	1.132	1.112	1.155	0.093	0.756	0.757	0.757	0.092	1.241	1.153	1.253	0.159	1.196	1.196	1.316	0.094	0.923	0.929	0.807	0.092	1.251	1.21	1.188	0.096	1.198	1.171	1.151	0.093	1.158	1.192	1.196
	11:00:12	37	1.231	1.24	1.025	0.092	1.097	1.087	1.103	0.095	0.477	0.475	0.49	0.092	1.272	1.088	1.244	0.092	1.15	1.134	1.172	0.093	0.771	0.773	0.773	0.092	1.267	1.179	1.279	0.161	1.217	1.217	1.333	0.094	0.931	0.934	0.815	0.092	1.278	1.239	1.216	0.095	1.224	1.2	1.179	0.093	1.187	1.219	1.223
	11:15:12	37	1.259	1.264	1.062	0.093	1.101	1.087	1.105	0.096	0.493	0.49	0.505	0.092	1.295	1.11	1.266	0.092	1.161	1.151	1.182	0.093	0.782	0.782	0.787	0.092	1.293	1.205	1.304	0.162	1.236	1.236	1.342	0.094	0.939	0.941	0.823	0.092	1.303	1.265	1.241	0.095	1.254	1.226	1.206	0.093	1.21	1.246	1.251
	11:30:12	37	1.279	1.289	1.103	0.093	1.102	1.088	1.105	0.096	0.51	0.506	0.52	0.092	1.316	1.122	1.286	0.092	1.169	1.161	1.186	0.093	0.791	0.791	0.795	0.092	1.317	1.228	1.326	0.163	1.249	1.248	1.35	0.094	0.944	0.947	0.828	0.092	1.324	1.288	1.265	0.096	1.279	1.251	1.228	0.093	1.234	1.271	1.274
	11:45:12	36.9	1.303	1.314	1.139	0.093	1.101	1.086	1.105	0.095	0.528	0.519	0.535	0.092	1.334	1.139	1.305	0.093	1.173	1.168	1.184	0.093	0.796	0.796	0.802	0.092	1.336	1.25	1.348	0.164	1.257	1.255	1.353	0.094	0.949	0.95	0.834	0.092	1.341	1.309	1.289	0.096	1.3	1.272	1.249	0.093	1.255	1.29	1.291
	12:00:12	37	1.322	1.332	1.171	0.092	1.099	1.084	1.102	0.095	0.542	0.532	0.549	0.092	1.35	1.159	1.32	0.092	1.176	1.171	1.184	0.093	0.802	0.802	0.805	0.091	1.351	1.269	1.365	0.166	1.261	1.259	1.356	0.094	0.952	0.954	0.838	0.092	1.353	1.325	1.309	0.095	1.318	1.292	1.265	0.093	1.27	1.306	1.304
	12:15:12	37	1.337	1.349	1.193	0.092	1.099	1.085	1.102	0.095	0.556	0.547	0.561	0.092	1.361	1.177	1.333	0.092	1.179	1.173	1.183	0.093	0.807	0.808	0.81	0.092	1.364	1.286	1.38	0.167	1.265	1.261	1.358	0.094	0.954	0.956	0.842	0.092	1.363	1.339	1.323	0.095	1.329	1.304	1.276	0.093	1.283	1.32	1.317
	12:30:12	37	1.351	1.363	1.212	0.092	1.1	1.087	1.104	0.095	0.57	0.559	0.574	0.092	1.372	1.192	1.409	0.092	1.182	1.173	1.182	0.092	0.81	0.81	0.813	0.092	1.375	1.298	1.391	0.17	1.268	1.263	1.361	0.094	0.957	0.958	0.845	0.092	1.372	1.348	1.335	0.095	1.343	1.317	1.287	0.093	1.293	1.332	1.327
	12:45:12	37	1.362	1.376	1.237	0.092	1.105	1.092	1.108	0.095	0.58	0.572	0.585	0.092	1.382	1.206	1.417	0.092	1.186	1.175	1.183	0.093	0.813	0.814	0.815	0.091	1.385	1.31	1.403	0.172	1.271	1.267	1.295	0.094	0.96	0.961	0.848	0.092	1.381	1.359	1.345	0.095	1.353	1.327	1.297	0.093	1.303	1.341	1.338
	13:00:12	37	1.373	1.387	1.256	0.092	1.111	1.099	1.114	0.095	0.593	0.582	0.595	0.092	1.392	1.218	1.427	0.092	1.191	1.178	1.186	0.092	0.819	0.816	0.818	0.092	1.394	1.321	1.412	0.174	1.277	1.272	1.303	0.094	0.963	0.963	0.852	0.092	1.389	1.368	1.355	0.095	1.362	1.337	1.308	0.093	1.309	1.351	1.347
	13:15:12	37	1.38	1.397	1.271	0.092	1.117	1.104	1.119	0.095	0.602	0.591	0.602	0.092	1.4	1.229	1.434	0.092	1.196	1.183	1.19	0.092	0.821	0.819	0.822	0.092	1.402	1.33	1.42	0.176	1.281	1.277	1.309	0.094	0.965	0.966	0.856	0.092	1.397	1.377	1.363	0.095	1.37	1.346	1.316	0.093	1.322	1.359	1.354
	13:30:12	37	1.386	1.404	1.283	0.092	1.123	1.11	1.126	0.095	0.61	0.599	0.608	0.092	1.406	1.238	1.441	0.092	1.203	1.189	1.195	0.092	0.824	0.823	0.824	0.092	1.407	1.339	1.428	0.177	1.287	1.282	1.313	0.094	0.968	0.97	0.86	0.092	1.402	1.385	1.37	0.095	1.378	1.354	1.322	0.093	1.328	1.365	1.359
	13:45:12	37	1.39	1.408	1.289	0.093	1.128	1.115	1.132	0.095	0.617	0.605	0.613	0.092	1.412	1.246	1.446	0.092	1.21	1.194	1.2	0.093	0.829	0.826	0.826	0.092	1.412	1.348	1.434	0.18	1.294	1.287	1.317	0.094	0.973	0.973	0.865	0.092	1.406	1.39	1.377	0.095	1.384	1.361	1.328	0.093	1.329	1.372	1.366
	14:00:12	37	1.393	1.411	1.296	0.093	1.132	1.12	1.137	0.095	0.623	0.609	0.618	0.092	1.417	1.251	1.451	0.092	1.216	1.2	1.205	0.093	0.832	0.831	0.83	0.092	1.415	1.355	1.439	0.182	1.298	1.292	1.321	0.094	0.977	0.976	0.868	0.092	1.409	1.395	1.382	0.096	1.389	1.366	1.33	0.093	1.333	1.375	1.368
	14:15:12	37.1	1.395	1.413	1.302	0.093	1.136	1.123	1.142	0.095	0.627	0.614	0.621	0.092	1.421	1.256	1.454	0.092	1.222	1.206	1.211	0.093	0.834	0.834	0.836	0.092	1.418	1.36	1.442	0.183	1.302	1.296	1.324	0.094	0.981	0.98	0.873	0.092	1.412	1.399	1.386	0.095	1.393	1.369	1.334	0.093	1.337	1.379	1.37
	14:30:12	37	1.396	1.412	1.306	0.093	1.139	1.126	1.145	0.095	0.631	0.617	0.625	0.092	1.424	1.261	1.457	0.092	1.227	1.212	1.214	0.093	0.838	0.84	0.839	0.092	1.42	1.364	1.444	0.184	1.305	1.3	1.326	0.094	0.984	0.983	0.877	0.092	1.414	1.402	1.389	0.095	1.395	1.372	1.338	0.093	1.339	1.381	1.373
	14:45:12	37	1.397	1.404	1.31	0.092	1.142	1.128	1.148	0.095	0.635	0.621	0.628	0.092	1.427	1.264	1.461	0.092	1.232	1.216	1.218	0.093	0.842	0.843	0.842	0.092	1.423	1.367	1.445	0.186	1.308	1.302	1.329	0.094	0.987	0.986	0.881	0.092	1.416	1.404	1.392	0.095	1.397	1.375	1.34	0.093	1.34	1.383	1.375
	15:00:12	37	1.398	1.398	1.313	0.093	1.143	1.13	1.15	0.095	0.639	0.624	0.632	0.092	1.429	1.267	1.465	0.092	1.237	1.22	1.221	0.093	0.847	0.847	0.847	0.092	1.424	1.37	1.446	0.188	1.31	1.303	1.33	0.094	0.99	0.989	0.884	0.092	1.417	1.406	1.395	0.095	1.399	1.377	1.342	0.093	1.342	1.385	1.376
	15:15:12	37	1.398	1.422	1.314	0.093	1.145	1.131	1.151	0.095	0.642	0.627	0.635	0.092	1.43	1.27	1.468	0.092	1.24	1.223	1.223	0.093	0.849	0.851	0.85	0.092	1.425	1.372	1.443	0.19	1.312	1.305	1.333	0.094	0.994	0.992	0.887	0.092	1.418	1.408	1.396	0.096	1.399	1.378	1.343	0.093	1.343	1.387	1.378
	15:30:12	37	1.398	1.466	1.311	0.092	1.147	1.132	1.152	0.095	0.646	0.63	0.638	0.092	1.431	1.272	1.469	0.092	1.244	1.226	1.225	0.093	0.853	0.854	0.853	0.092	1.426	1.373	1.438	0.19	1.314	1.306	1.334	0.094	0.992	0.994	0.889	0.092	1.42	1.409	1.396	0.095	1.401	1.379	1.344	0.093	1.345	1.388	1.379
	15:45:12	37	1.398	1.477	1.306	0.093	1.147	1.132	1.153	0.095	0.649	0.633	0.641	0.092	1.431	1.274	1.47	0.092	1.243	1.229	1.226	0.093	0.855	0.858	0.857	0.092	1.427	1.374	1.441	0.192	1.315	1.306	1.334	0.094	0.979	0.997	0.891	0.092	1.42	1.41	1.397	0.096	1.402	1.383	1.345	0.093	1.344	1.39	1.38
	16:00:12	37	1.397	1.459	1.314	0.093	1.149	1.133	1.153	0.095	0.652	0.636	0.643	0.092	1.431	1.276	1.468	0.092	1.237	1.231	1.227	0.092	0.857	0.859	0.862	0.092	1.427	1.375	1.469	0.193	1.315	1.302	1.335	0.094	1.002	1	0.894	0.092	1.421	1.411	1.394	0.095	1.402	1.383	1.346	0.093	1.342	1.392	1.381
	16:15:12	37	1.396	1.456	1.348	0.093	1.116	1.134	1.153	0.095	0.655	0.637	0.645	0.092	1.43	1.279	1.465	0.092	1.265	1.233	1.227	0.093	0.861	0.863	0.865	0.092	1.428	1.376	1.507	0.193	1.316	1.315	1.337	0.094	1.099	1.001	0.895	0.092	1.423	1.413	1.385	0.095	1.402	1.382	1.347	0.093	1.339	1.393	1.38
	16:30:12	37	1.395	1.455	1.399	0.092	1.108	1.134	1.153	0.095	0.657	0.64	0.647	0.092	1.432	1.28	1.459	0.092	1.321	1.236	1.228	0.093	0.861	0.865	0.866	0.092	1.429	1.376	1.514	0.195	1.312	1.367	1.337	0.094	1.172	1.003	0.897	0.092	1.423	1.413	1.374	0.096	1.403	1.383	1.346	0.093	1.332	1.393	1.38
	16:45:12	37	1.394	1.457	1.438	0.092	1.117	1.135	1.153	0.095	0.66	0.643	0.65	0.092	1.431	1.283	1.46	0.092	1.373	1.238	1.227	0.093	0.864	0.868	0.869	0.092	1.43	1.375	1.498	0.196	1.301	1.416	1.337	0.094	1.177	1.005	0.898	0.092	1.424	1.415	1.404	0.096	1.403	1.383	1.347	0.093	1.343	1.395	1.38
	17:00:12	37	1.391	1.462	1.44	0.092	1.129	1.135	1.151	0.095	0.662	0.646	0.652	0.092	1.42	1.285	1.469	0.092	1.391	1.239	1.227	0.092	0.867	0.871	0.871	0.092	1.431	1.368	1.492	0.197	1.29	1.395	1.338	0.094	1.198	1.006	0.899	0.092	1.424	1.415	1.475	0.095	1.404	1.383	1.348	0.093	1.385	1.394	1.381
	17:15:12	37	1.385	1.471	1.441	0.093	1.13	1.135	1.149	0.095	0.665	0.648	0.655	0.092	1.413	1.287	1.485	0.092	1.406	1.241	1.224	0.093	0.867	0.872	0.873	0.092	1.431	1.358	1.489	0.197	1.308	1.396	1.339	0.094	1.228	1.007	0.898	0.092	1.423	1.415	1.545	0.095	1.405	1.384	1.349	0.093	1.44	1.398	1.38
	17:30:12	37	1.377	1.481	1.448	0.092	1.123	1.134	1.153	0.094	0.668	0.651	0.657	0.092	1.438	1.289	1.508	0.092	1.429	1.243	1.221	0.092	0.863	0.872	0.874	0.091	1.431	1.374	1.485	0.201	1.358	1.406	1.338	0.094	1.264	1.01	0.899	0.092	1.421	1.415	1.544	0.095	1.405	1.385	1.349	0.093	1.463	1.398	1.379
	17:45:12	37	1.381	1.493	1.458	0.093	1.119	1.132	1.173	0.095	0.669	0.654	0.657	0.092	1.483	1.294	1.536	0.092	1.463	1.245	1.21	0.093	0.858	0.87	0.875	0.092	1.432	1.412	1.488	0.201	1.396	1.421	1.339	0.094	1.308	1.012	0.894	0.092	1.415	1.415	1.539	0.096	1.406	1.385	1.346	0.093	1.449	1.399	1.378
	18:00:12	37	1.409	1.507	1.471	0.092	1.129	1.127	1.208	0.095	0.672	0.656	0.659	0.092	1.498	1.298	1.555	0.092	1.503	1.243	1.201	0.093	0.865	0.866	0.875	0.092	1.433	1.45	1.495	0.204	1.413	1.441	1.339	0.094	1.358	1.013	0.892	0.092	1.404	1.415	1.547	0.095	1.406	1.387	1.341	0.093	1.444	1.399	1.371
	18:15:12	37	1.441	1.522	1.484	0.092	1.159	1.119	1.242	0.094	0.674	0.658	0.656	0.092	1.495	1.297	1.561	0.092	1.545	1.239	1.229	0.093	0.928	0.874	0.877	0.092	1.433	1.458	1.506	0.206	1.428	1.464	1.338	0.094	1.413	1.011	0.99	0.092	1.418	1.415	1.56	0.095	1.407	1.386	1.334	0.093	1.447	1.4	1.359
	18:30:12	37	1.446	1.538	1.498	0.093	1.214	1.14	1.249	0.095	0.675	0.66	0.656	0.092	1.502	1.292	1.562	0.092	1.588	1.232	1.3	0.093	0.993	0.906	0.877	0.092	1.433	1.45	1.517	0.206	1.441	1.488	1.338	0.094	1.472	1.01	1.093	0.092	1.467	1.415	1.574	0.096	1.406	1.389	1.339	0.093	1.456	1.402	1.353
	18:45:12	37	1.438	1.555	1.513	0.093	1.28	1.216	1.253	0.095	0.677	0.66	0.683	0.092	1.511	1.294	1.566	0.092	1.624	1.23	1.38	0.093	1.013	0.948	0.879	0.092	1.434	1.453	1.529	0.206	1.456	1.514	1.339	0.094	1.532	1.011	1.11	0.092	1.528	1.415	1.591	0.095	1.406	1.387	1.374	0.093	1.464	1.402	1.378
	19:00:12	37	1.436	1.57	1.529	0.092	1.345	1.303	1.264	0.094	0.677	0.662	0.739	0.092	1.522	1.312	1.573	0.092	1.663	1.24	1.433	0.092	1.023	0.979	0.88	0.092	1.435	1.461	1.543	0.209	1.473	1.538	1.338	0.094	1.592	1.018	1.133	0.092	1.543	1.413	1.611	0.095	1.407	1.387	1.426	0.093	1.472	1.404	1.432
	19:15:12	37	1.438	1.586	1.547	0.092	1.399	1.334	1.281	0.094	0.678	0.663	0.787	0.092	1.538	1.337	1.585	0.092	1.688	1.268	1.464	0.093	1.039	1.003	0.879	0.092	1.435	1.47	1.558	0.209	1.496	1.563	1.339	0.094	1.651	1.026	1.168	0.092	1.53	1.411	1.634	0.095	1.407	1.387	1.477	0.093	1.481	1.404	1.488
	19:30:12	37	1.442	1.602	1.563	0.092	1.444	1.347	1.303	0.094	0.681	0.664	0.803	0.092	1.554	1.358	1.601	0.092	1.71	1.316	1.49	0.092	1.06	1.028	0.879	0.092	1.435	1.481	1.572	0.212	1.519	1.583	1.338	0.094	1.703	1.036	1.209	0.092	1.529	1.407	1.658	0.095	1.408	1.389	1.486	0.093	1.489	1.404	1.517
	19:45:12	37	1.447	1.615	1.58	0.093	1.483	1.366	1.327	0.094	0.69	0.666	0.813	0.092	1.571	1.365	1.618	0.092	1.73	1.381	1.522	0.093	1.089	1.052	0.88	0.092	1.436	1.496	1.587	0.213	1.542	1.605	1.338	0.094	1.747	1.051	1.256	0.092	1.533	1.399	1.683	0.096	1.408	1.389	1.477	0.093	1.499	1.405	1.524
	20:00:12	37	1.45	1.628	1.596	0.093	1.511	1.386	1.354	0.094	0.704	0.667	0.828	0.092	1.586	1.361	1.637	0.092	1.748	1.446	1.558	0.092	1.124	1.078	0.878	0.092	1.436	1.514	1.6	0.213	1.565	1.625	1.336	0.094	1.783	1.069	1.306	0.092	1.541	1.389	1.707	0.095	1.407	1.385	1.477	0.093	1.51	1.405	1.53
	20:15:12	37	1.455	1.639	1.612	0.093	1.533	1.411	1.383	0.094	0.725	0.668	0.844	0.092	1.6	1.363	1.652	0.092	1.762	1.499	1.596	0.093	1.167	1.108	0.876	0.092	1.437	1.534	1.612	0.215	1.583	1.639	1.334	0.094	1.811	1.093	1.36	0.092	1.551	1.377	1.728	0.095	1.407	1.382	1.481	0.093	1.524	1.405	1.541
	20:30:12	37	1.459	1.649	1.626	0.093	1.548	1.441	1.413	0.094	0.751	0.67	0.865	0.092	1.612	1.365	1.671	0.092	1.766	1.536	1.632	0.093	1.215	1.146	0.873	0.092	1.437	1.555	1.625	0.215	1.596	1.641	1.33	0.094	1.835	1.122	1.416	0.092	1.561	1.373	1.746	0.095	1.405	1.374	1.485	0.093	1.538	1.402	1.552
	20:45:12	37	1.463	1.657	1.639	0.092	1.552	1.47	1.446	0.094	0.78	0.671	0.891	0.092	1.622	1.37	1.688	0.092	1.767	1.572	1.66	0.092	1.268	1.192	0.874	0.092	1.437	1.577	1.635	0.218	1.605	1.634	1.323	0.094	1.86	1.152	1.473	0.092	1.571	1.385	1.763	0.095	1.403	1.373	1.488	0.093	1.552	1.401	1.562
	21:00:12	36.9	1.469	1.665	1.647	0.093	1.552	1.495	1.478	0.094	0.805	0.671	0.92	0.092	1.631	1.376	1.704	0.092	1.766	1.613	1.677	0.093	1.324	1.245	0.895	0.092	1.438	1.598	1.644	0.22	1.609	1.621	1.313	0.094	1.887	1.179	1.53	0.092	1.582	1.411	1.78	0.095	1.4	1.389	1.493	0.093	1.564	1.393	1.574
	21:15:12	37	1.475	1.671	1.656	0.092	1.535	1.514	1.504	0.094	0.819	0.672	0.951	0.092	1.639	1.383	1.719	0.092	1.764	1.654	1.683	0.093	1.388	1.3	0.942	0.092	1.437	1.617	1.652	0.22	1.606	1.608	1.311	0.094	1.915	1.192	1.578	0.092	1.594	1.44	1.794	0.095	1.393	1.427	1.499	0.093	1.576	1.388	1.584
	21:30:12	37	1.481	1.675	1.662	0.092	1.523	1.525	1.523	0.094	0.824	0.672	0.985	0.092	1.646	1.389	1.733	0.092	1.745	1.688	1.678	0.093	1.456	1.357	1.012	0.091	1.438	1.634	1.659	0.221	1.601	1.593	1.338	0.094	1.929	1.202	1.627	0.092	1.605	1.466	1.806	0.095	1.383	1.481	1.505	0.093	1.585	1.402	1.595
	21:45:12	37.1	1.486	1.68	1.666	0.092	1.514	1.53	1.536	0.094	0.829	0.672	1.021	0.092	1.652	1.395	1.745	0.092	1.71	1.715	1.662	0.092	1.521	1.422	1.095	0.092	1.438	1.65	1.666	0.223	1.593	1.579	1.391	0.094	1.949	1.214	1.668	0.092	1.617	1.487	1.816	0.095	1.385	1.53	1.514	0.093	1.597	1.441	1.605
	22:00:12	37	1.492	1.684	1.671	0.093	1.501	1.532	1.543	0.094	0.838	0.673	1.062	0.092	1.657	1.403	1.755	0.092	1.661	1.735	1.645	0.092	1.58	1.485	1.136	0.092	1.438	1.665	1.672	0.224	1.587	1.568	1.453	0.094	1.962	1.231	1.701	0.092	1.629	1.506	1.825	0.095	1.403	1.538	1.526	0.093	1.607	1.486	1.614
	22:15:12	37	1.496	1.688	1.674	0.093	1.492	1.529	1.546	0.094	0.85	0.673	1.105	0.092	1.662	1.411	1.764	0.092	1.594	1.749	1.631	0.093	1.635	1.545	1.15	0.092	1.437	1.677	1.677	0.225	1.58	1.56	1.504	0.094	1.972	1.248	1.732	0.092	1.639	1.523	1.833	0.096	1.43	1.523	1.539	0.093	1.616	1.511	1.622
	22:30:12	37	1.5	1.69	1.677	0.092	1.483	1.524	1.544	0.094	0.863	0.674	1.153	0.092	1.666	1.419	1.771	0.092	1.556	1.754	1.62	0.092	1.684	1.604	1.176	0.092	1.435	1.689	1.681	0.226	1.573	1.552	1.528	0.094	1.98	1.269	1.759	0.092	1.649	1.541	1.84	0.095	1.465	1.513	1.55	0.093	1.625	1.503	1.63
	22:45:12	37	1.504	1.694	1.68	0.093	1.474	1.514	1.537	0.094	0.879	0.675	1.2	0.092	1.669	1.428	1.777	0.092	1.533	1.753	1.613	0.093	1.736	1.657	1.208	0.092	1.432	1.699	1.685	0.228	1.565	1.544	1.538	0.094	1.989	1.298	1.781	0.092	1.658	1.557	1.847	0.096	1.498	1.511	1.56	0.093	1.632	1.49	1.637
	23:00:12	37	1.506	1.695	1.683	0.093	1.464	1.5	1.527	0.094	0.894	0.675	1.247	0.092	1.672	1.436	1.783	0.092	1.518	1.749	1.608	0.092	1.777	1.704	1.245	0.092	1.428	1.708	1.688	0.229	1.556	1.535	1.546	0.094	1.999	1.335	1.799	0.092	1.666	1.572	1.854	0.095	1.517	1.513	1.569	0.093	1.638	1.488	1.643
	23:15:12	37	1.51	1.698	1.685	0.093	1.453	1.486	1.493	0.094	0.91	0.676	1.293	0.092	1.674	1.444	1.787	0.092	1.509	1.746	1.603	0.092	1.807	1.742	1.289	0.092	1.426	1.715	1.69	0.23	1.545	1.523	1.554	0.094	2.008	1.381	1.819	0.092	1.673	1.587	1.861	0.095	1.524	1.515	1.577	0.093	1.641	1.489	1.647
	23:30:12	37	1.512	1.7	1.688	0.092	1.444	1.473	1.489	0.094	0.926	0.677	1.336	0.092	1.675	1.452	1.79	0.092	1.503	1.738	1.595	0.092	1.836	1.778	1.338	0.092	1.434	1.722	1.693	0.231	1.535	1.509	1.562	0.094	2.015	1.43	1.835	0.092	1.679	1.601	1.867	0.095	1.526	1.52	1.584	0.093	1.644	1.489	1.651
	23:45:12	37	1.514	1.701	1.69	0.092	1.437	1.434	1.476	0.094	0.943	0.677	1.377	0.092	1.677	1.459	1.793	0.092	1.504	1.731	1.586	0.092	1.854	1.8	1.388	0.092	1.452	1.728	1.695	0.233	1.529	1.492	1.571	0.094	2.02	1.482	1.85	0.092	1.684	1.614	1.873	0.095	1.527	1.525	1.59	0.093	1.646	1.489	1.655
	1 day, 0:00:12	37	1.516	1.704	1.692	0.092	1.433	1.433	1.462	0.094	0.961	0.678	1.416	0.092	1.678	1.464	1.796	0.092	1.504	1.721	1.574	0.092	1.871	1.821	1.442	0.092	1.479	1.734	1.698	0.234	1.519	1.475	1.579	0.094	2.026	1.533	1.862	0.092	1.688	1.627	1.88	0.095	1.53	1.531	1.595	0.093	1.649	1.489	1.658
	1 day, 0:15:12	37	1.517	1.706	1.694	0.092	1.429	1.421	1.445	0.094	0.982	0.678	1.453	0.092	1.679	1.47	1.797	0.092	1.505	1.71	1.558	0.093	1.888	1.84	1.497	0.092	1.504	1.738	1.7	0.233	1.508	1.463	1.587	0.094	2.031	1.587	1.872	0.092	1.692	1.639	1.885	0.095	1.534	1.538	1.599	0.093	1.649	1.489	1.659
	1 day, 0:30:12	37	1.518	1.708	1.696	0.092	1.425	1.411	1.432	0.094	1.008	0.678	1.484	0.092	1.68	1.474	1.8	0.092	1.509	1.695	1.543	0.092	1.907	1.865	1.551	0.092	1.52	1.742	1.702	0.233	1.496	1.459	1.594	0.094	2.035	1.639	1.878	0.092	1.694	1.649	1.891	0.095	1.538	1.544	1.603	0.093	1.651	1.491	1.661
	1 day, 0:45:12	37	1.52	1.709	1.698	0.092	1.42	1.403	1.421	0.094	1.04	0.678	1.514	0.092	1.682	1.478	1.802	0.092	1.514	1.677	1.526	0.092	1.928	1.892	1.606	0.092	1.52	1.746	1.704	0.235	1.481	1.463	1.601	0.094	2.038	1.688	1.883	0.092	1.697	1.659	1.896	0.095	1.545	1.55	1.605	0.093	1.651	1.492	1.663
	1 day, 1:00:12	37	1.52	1.711	1.699	0.093	1.413	1.398	1.414	0.094	1.076	0.678	1.542	0.092	1.682	1.48	1.804	0.092	1.518	1.657	1.51	0.092	1.947	1.938	1.653	0.092	1.512	1.75	1.706	0.236	1.463	1.469	1.606	0.094	2.044	1.73	1.889	0.092	1.701	1.668	1.9	0.095	1.55	1.557	1.608	0.093	1.653	1.493	1.664
	1 day, 1:15:12	37	1.521	1.712	1.701	0.093	1.406	1.393	1.411	0.094	1.117	0.678	1.567	0.092	1.684	1.484	1.806	0.092	1.521	1.637	1.492	0.093	1.963	1.967	1.697	0.092	1.505	1.753	1.709	0.237	1.447	1.47	1.61	0.094	2.05	1.768	1.892	0.092	1.703	1.678	1.905	0.095	1.554	1.563	1.611	0.093	1.653	1.494	1.664
	1 day, 1:30:12	37	1.522	1.714	1.702	0.093	1.402	1.39	1.408	0.094	1.161	0.678	1.589	0.092	1.685	1.487	1.808	0.092	1.524	1.616	1.477	0.092	1.976	1.989	1.736	0.092	1.501	1.756	1.71	0.237	1.435	1.473	1.612	0.094	2.057	1.803	1.895	0.092	1.705	1.685	1.909	0.095	1.559	1.569	1.612	0.093	1.654	1.495	1.665
	1 day, 1:45:12	37	1.522	1.715	1.704	0.092	1.398	1.388	1.407	0.094	1.207	0.677	1.608	0.092	1.686	1.489	1.811	0.092	1.527	1.596	1.464	0.092	1.988	2.006	1.771	0.092	1.5	1.76	1.712	0.239	1.428	1.475	1.611	0.094	2.065	1.831	1.899	0.092	1.708	1.692	1.913	0.095	1.563	1.573	1.613	0.093	1.655	1.497	1.666
	1 day, 2:00:12	37	1.523	1.716	1.705	0.092	1.396	1.386	1.405	0.094	1.252	0.676	1.627	0.092	1.688	1.491	1.813	0.092	1.528	1.576	1.454	0.093	1.998	2.018	1.803	0.092	1.5	1.764	1.714	0.239	1.423	1.479	1.61	0.094	2.072	1.855	1.901	0.092	1.71	1.698	1.917	0.095	1.568	1.578	1.615	0.093	1.655	1.497	1.666
	1 day, 2:15:12	37	1.524	1.716	1.707	0.092	1.396	1.383	1.405	0.094	1.297	0.674	1.646	0.092	1.689	1.493	1.815	0.092	1.53	1.557	1.447	0.092	2.006	2.028	1.827	0.091	1.501	1.767	1.715	0.239	1.423	1.479	1.608	0.094	2.08	1.874	1.903	0.092	1.711	1.704	1.919	0.095	1.571	1.581	1.616	0.093	1.656	1.498	1.666
	1 day, 2:30:12	37	1.525	1.717	1.708	0.092	1.396	1.38	1.403	0.094	1.339	0.67	1.663	0.092	1.691	1.494	1.818	0.092	1.53	1.54	1.442	0.092	2.015	2.04	1.849	0.091	1.501	1.77	1.716	0.239	1.424	1.482	1.605	0.093	2.087	1.889	1.905	0.092	1.713	1.708	1.922	0.095	1.575	1.584	1.616	0.093	1.656	1.5	1.667
	1 day, 2:45:12	37	1.526	1.718	1.709	0.093	1.396	1.378	1.403	0.094	1.38	0.671	1.682	0.092	1.693	1.495	1.82	0.092	1.532	1.526	1.44	0.093	2.024	2.05	1.874	0.092	1.502	1.773	1.719	0.241	1.425	1.483	1.6	0.094	2.094	1.903	1.907	0.092	1.716	1.712	1.925	0.096	1.579	1.587	1.617	0.093	1.657	1.502	1.667
	1 day, 3:00:12	37	1.528	1.718	1.71	0.092	1.397	1.375	1.402	0.094	1.418	0.686	1.696	0.092	1.694	1.498	1.822	0.092	1.534	1.517	1.437	0.092	2.032	2.056	1.891	0.092	1.503	1.776	1.72	0.242	1.427	1.482	1.594	0.094	2.1	1.917	1.909	0.092	1.717	1.717	1.928	0.095	1.583	1.589	1.619	0.093	1.658	1.504	1.668
	1 day, 3:15:12	36.9	1.528	1.719	1.712	0.092	1.4	1.374	1.405	0.094	1.454	0.725	1.706	0.092	1.695	1.5	1.825	0.092	1.536	1.51	1.445	0.093	2.037	2.063	1.911	0.092	1.504	1.78	1.722	0.242	1.424	1.483	1.588	0.094	2.104	1.929	1.907	0.092	1.72	1.72	1.931	0.095	1.585	1.592	1.62	0.093	1.658	1.508	1.669
	1 day, 3:30:12	37	1.53	1.72	1.714	0.093	1.401	1.372	1.406	0.094	1.488	0.791	1.716	0.092	1.697	1.501	1.827	0.092	1.538	1.502	1.446	0.092	2.042	2.068	1.931	0.092	1.505	1.783	1.723	0.242	1.422	1.484	1.581	0.094	2.109	1.937	1.907	0.092	1.721	1.724	1.934	0.095	1.588	1.594	1.62	0.093	1.659	1.507	1.669
	1 day, 3:45:12	37	1.53	1.719	1.714	0.092	1.404	1.37	1.407	0.094	1.515	0.889	1.723	0.092	1.698	1.502	1.829	0.092	1.541	1.498	1.448	0.093	2.048	2.071	1.946	0.092	1.506	1.786	1.725	0.244	1.422	1.486	1.575	0.093	2.113	1.944	1.905	0.092	1.723	1.728	1.938	0.095	1.589	1.595	1.621	0.093	1.66	1.51	1.67
	1 day, 4:00:12	37	1.531	1.719	1.716	0.093	1.407	1.372	1.408	0.094	1.541	1.01	1.728	0.092	1.7	1.504	1.831	0.092	1.544	1.495	1.452	0.093	2.053	2.076	1.96	0.092	1.508	1.789	1.726	0.245	1.422	1.487	1.565	0.094	2.115	1.949	1.905	0.092	1.725	1.731	1.943	0.095	1.591	1.597	1.623	0.093	1.66	1.512	1.671
	1 day, 4:15:12	37	1.532	1.719	1.717	0.093	1.411	1.374	1.408	0.094	1.567	1.143	1.732	0.092	1.701	1.506	1.834	0.092	1.544	1.494	1.456	0.093	2.057	2.078	1.972	0.092	1.508	1.792	1.728	0.244	1.422	1.487	1.552	0.094	2.117	1.948	1.911	0.092	1.726	1.734	1.948	0.096	1.592	1.599	1.623	0.093	1.661	1.513	1.671
	1 day, 4:30:12	37	1.533	1.719	1.717	0.092	1.416	1.377	1.41	0.094	1.59	1.268	1.736	0.092	1.702	1.507	1.835	0.092	1.547	1.494	1.459	0.093	2.061	2.079	1.983	0.092	1.509	1.796	1.729	0.245	1.422	1.489	1.534	0.094	2.116	1.944	1.91	0.092	1.728	1.737	1.952	0.095	1.594	1.599	1.624	0.093	1.661	1.514	1.672
	1 day, 4:45:12	37	1.533	1.719	1.719	0.092	1.419	1.38	1.412	0.094	1.611	1.356	1.734	0.092	1.704	1.509	1.837	0.092	1.549	1.498	1.462	0.092	2.064	2.08	1.989	0.091	1.511	1.799	1.73	0.247	1.422	1.491	1.516	0.094	2.113	1.943	1.91	0.092	1.729	1.739	1.961	0.095	1.596	1.601	1.625	0.093	1.662	1.516	1.673
	1 day, 5:00:12	37	1.534	1.719	1.72	0.093	1.424	1.383	1.416	0.094	1.63	1.423	1.735	0.092	1.704	1.511	1.839	0.092	1.553	1.504	1.464	0.092	2.067	2.08	1.994	0.091	1.512	1.802	1.732	0.246	1.423	1.494	1.499	0.094	2.106	1.944	1.908	0.092	1.731	1.742	1.966	0.095	1.597	1.603	1.626	0.093	1.662	1.517	1.673
	1 day, 5:15:12	37	1.534	1.719	1.721	0.093	1.427	1.389	1.422	0.094	1.648	1.476	1.735	0.092	1.705	1.514	1.842	0.092	1.556	1.506	1.467	0.093	2.068	2.079	1.998	0.091	1.513	1.805	1.733	0.247	1.424	1.496	1.485	0.094	2.098	1.948	1.909	0.092	1.732	1.744	1.968	0.095	1.599	1.604	1.627	0.093	1.663	1.518	1.674
	1 day, 5:30:12	37	1.535	1.719	1.722	0.092	1.433	1.396	1.425	0.094	1.662	1.516	1.734	0.092	1.707	1.515	1.844	0.092	1.559	1.509	1.469	0.092	2.07	2.079	2	0.092	1.514	1.807	1.734	0.249	1.424	1.496	1.478	0.094	2.088	1.952	1.909	0.092	1.733	1.747	1.97	0.095	1.601	1.605	1.629	0.093	1.663	1.518	1.675
	1 day, 5:45:12	37	1.536	1.719	1.723	0.092	1.437	1.399	1.431	0.094	1.674	1.549	1.729	0.092	1.708	1.517	1.846	0.092	1.56	1.512	1.47	0.092	2.071	2.078	2.001	0.091	1.516	1.809	1.735	0.249	1.426	1.5	1.474	0.094	2.078	1.955	1.911	0.092	1.735	1.75	1.972	0.095	1.602	1.606	1.63	0.093	1.663	1.519	1.676
	1 day, 6:00:12	37	1.536	1.718	1.724	0.092	1.441	1.404	1.436	0.094	1.681	1.569	1.727	0.092	1.709	1.52	1.848	0.092	1.565	1.514	1.472	0.092	2.072	2.078	2.003	0.092	1.518	1.811	1.736	0.25	1.428	1.502	1.468	0.094	2.063	1.961	1.909	0.092	1.736	1.752	1.972	0.095	1.603	1.608	1.631	0.093	1.664	1.52	1.676
	1 day, 6:15:12	37	1.537	1.718	1.725	0.092	1.446	1.41	1.44	0.094	1.688	1.583	1.726	0.092	1.71	1.522	1.849	0.092	1.566	1.516	1.473	0.093	2.072	2.077	2.005	0.092	1.519	1.814	1.736	0.251	1.431	1.504	1.464	0.094	2.051	1.964	1.907	0.092	1.737	1.754	1.975	0.095	1.604	1.609	1.632	0.093	1.664	1.52	1.677
	1 day, 6:30:12	37	1.538	1.718	1.725	0.092	1.45	1.415	1.444	0.094	1.695	1.599	1.722	0.092	1.711	1.524	1.851	0.092	1.569	1.52	1.475	0.092	2.072	2.076	2.005	0.091	1.519	1.815	1.737	0.253	1.433	1.505	1.474	0.094	2.039	1.967	1.903	0.092	1.737	1.756	1.976	0.095	1.607	1.61	1.633	0.093	1.665	1.521	1.677
	1 day, 6:45:12	37	1.538	1.718	1.726	0.093	1.454	1.421	1.45	0.094	1.698	1.605	1.719	0.092	1.712	1.526	1.853	0.092	1.571	1.523	1.478	0.092	2.072	2.075	2.006	0.092	1.52	1.818	1.738	0.255	1.436	1.507	1.479	0.094	2.037	1.97	1.903	0.092	1.738	1.759	1.978	0.095	1.608	1.612	1.633	0.093	1.665	1.523	1.678
	1 day, 7:00:12	37	1.539	1.718	1.727	0.093	1.459	1.427	1.453	0.094	1.7	1.612	1.714	0.092	1.713	1.528	1.854	0.092	1.576	1.525	1.484	0.092	2.073	2.074	2.007	0.091	1.522	1.82	1.739	0.254	1.438	1.512	1.478	0.094	2.036	1.976	1.898	0.092	1.739	1.761	1.978	0.095	1.609	1.613	1.634	0.093	1.665	1.524	1.678
	1 day, 7:15:12	37	1.539	1.717	1.727	0.092	1.464	1.435	1.458	0.094	1.701	1.617	1.712	0.092	1.713	1.53	1.856	0.092	1.58	1.528	1.486	0.092	2.072	2.073	2.007	0.091	1.523	1.822	1.74	0.257	1.441	1.516	1.482	0.093	2.038	1.979	1.897	0.092	1.74	1.763	1.979	0.095	1.61	1.615	1.635	0.093	1.665	1.524	1.678
	1 day, 7:30:12	37	1.54	1.717	1.728	0.093	1.47	1.44	1.463	0.094	1.7	1.619	1.709	0.092	1.713	1.532	1.858	0.092	1.583	1.53	1.488	0.092	2.072	2.072	2.008	0.092	1.524	1.823	1.741	0.257	1.442	1.519	1.486	0.094	2.038	1.983	1.895	0.092	1.741	1.765	1.979	0.095	1.611	1.617	1.636	0.093	1.665	1.525	1.678
	1 day, 7:45:12	37	1.54	1.717	1.728	0.093	1.476	1.447	1.47	0.094	1.697	1.62	1.704	0.092	1.714	1.534	1.859	0.092	1.585	1.534	1.491	0.092	2.071	2.071	2.009	0.092	1.525	1.825	1.742	0.26	1.443	1.524	1.483	0.094	2.04	1.986	1.896	0.092	1.741	1.767	1.981	0.095	1.613	1.618	1.637	0.093	1.666	1.525	1.679
	1 day, 8:00:12	37	1.54	1.716	1.728	0.092	1.483	1.454	1.474	0.094	1.696	1.618	1.7	0.092	1.714	1.535	1.86	0.092	1.589	1.536	1.494	0.092	2.071	2.069	2.008	0.092	1.526	1.827	1.742	0.26	1.445	1.527	1.488	0.094	2.039	1.988	1.886	0.092	1.741	1.768	1.98	0.095	1.614	1.62	1.637	0.093	1.666	1.525	1.679
	1 day, 8:15:12	37	1.541	1.716	1.728	0.092	1.489	1.459	1.48	0.094	1.691	1.617	1.698	0.092	1.715	1.537	1.862	0.092	1.592	1.538	1.498	0.092	2.069	2.068	2.009	0.092	1.527	1.829	1.742	0.263	1.448	1.532	1.493	0.094	2.036	1.989	1.89	0.092	1.742	1.77	1.982	0.095	1.616	1.621	1.638	0.093	1.666	1.527	1.679
	1 day, 8:30:12	37	1.541	1.715	1.729	0.093	1.495	1.467	1.486	0.094	1.688	1.615	1.695	0.092	1.715	1.538	1.863	0.092	1.594	1.541	1.501	0.092	2.069	2.067	2.008	0.092	1.528	1.83	1.742	0.264	1.452	1.536	1.495	0.094	2.033	1.99	1.89	0.092	1.742	1.771	1.979	0.095	1.617	1.622	1.639	0.093	1.666	1.526	1.68
	1 day, 8:45:12	37	1.542	1.715	1.73	0.092	1.499	1.472	1.494	0.094	1.682	1.612	1.693	0.092	1.716	1.539	1.864	0.092	1.599	1.542	1.506	0.092	2.068	2.065	2.007	0.091	1.528	1.832	1.743	0.267	1.453	1.536	1.496	0.094	2.029	1.989	1.887	0.092	1.743	1.773	1.978	0.095	1.618	1.623	1.639	0.093	1.666	1.528	1.68
	1 day, 9:00:12	37	1.542	1.714	1.73	0.092	1.506	1.484	1.498	0.094	1.676	1.608	1.684	0.092	1.716	1.54	1.866	0.092	1.603	1.545	1.508	0.093	2.067	2.063	2.007	0.092	1.53	1.833	1.744	0.269	1.455	1.538	1.5	0.094	2.026	1.988	1.885	0.092	1.743	1.775	1.98	0.095	1.62	1.623	1.64	0.093	1.666	1.529	1.68
	1 day, 9:15:12	37	1.543	1.713	1.73	0.093	1.51	1.49	1.503	0.094	1.674	1.604	1.682	0.092	1.716	1.542	1.866	0.092	1.606	1.55	1.51	0.092	2.066	2.062	2.006	0.092	1.53	1.835	1.744	0.271	1.457	1.54	1.502	0.094	2.024	1.99	1.886	0.092	1.743	1.776	1.983	0.095	1.621	1.625	1.64	0.093	1.666	1.53	1.68
	1 day, 9:30:12	37	1.543	1.713	1.73	0.092	1.513	1.495	1.511	0.094	1.663	1.602	1.681	0.092	1.717	1.544	1.867	0.092	1.609	1.554	1.509	0.092	2.066	2.061	2.005	0.092	1.531	1.836	1.744	0.274	1.46	1.543	1.503	0.094	2.021	1.989	1.884	0.092	1.744	1.778	1.985	0.095	1.622	1.627	1.641	0.093	1.666	1.53	1.68
	1 day, 9:45:12	37	1.543	1.712	1.729	0.092	1.519	1.503	1.517	0.094	1.662	1.597	1.69	0.092	1.717	1.545	1.869	0.092	1.61	1.556	1.511	0.092	2.064	2.06	2.005	0.092	1.532	1.837	1.744	0.273	1.461	1.543	1.507	0.093	2.02	1.988	1.889	0.092	1.744	1.779	1.987	0.095	1.623	1.629	1.641	0.093	1.666	1.531	1.68
	1 day, 10:00:12	37	1.544	1.712	1.73	0.092	1.523	1.508	1.526	0.094	1.657	1.594	1.697	0.092	1.717	1.546	1.869	0.092	1.612	1.558	1.515	0.092	2.062	2.059	2.005	0.091	1.533	1.837	1.744	0.279	1.462	1.547	1.511	0.093	2.018	1.99	1.889	0.092	1.744	1.78	1.988	0.095	1.624	1.63	1.642	0.093	1.666	1.532	1.681
	1 day, 10:15:12	37	1.544	1.711	1.729	0.092	1.53	1.515	1.531	0.094	1.654	1.591	1.697	0.092	1.716	1.548	1.87	0.092	1.613	1.558	1.521	0.092	2.061	2.058	2.004	0.091	1.533	1.838	1.745	0.28	1.468	1.55	1.512	0.094	2.016	1.989	1.891	0.092	1.744	1.782	1.991	0.095	1.626	1.63	1.642	0.093	1.666	1.533	1.681
	1 day, 10:30:12	37	1.545	1.71	1.729	0.093	1.53	1.516	1.537	0.094	1.65	1.587	1.701	0.092	1.717	1.549	1.871	0.092	1.615	1.561	1.525	0.092	2.059	2.06	2.004	0.092	1.535	1.839	1.745	0.283	1.467	1.554	1.518	0.094	2.014	1.989	1.889	0.092	1.744	1.783	1.992	0.095	1.627	1.632	1.643	0.093	1.666	1.534	1.681
	1 day, 10:45:12	37	1.545	1.71	1.729	0.093	1.541	1.524	1.542	0.094	1.642	1.584	1.701	0.092	1.717	1.55	1.873	0.092	1.616	1.564	1.527	0.093	2.058	2.06	2.003	0.092	1.536	1.84	1.745	0.284	1.476	1.555	1.526	0.094	2.012	1.988	1.893	0.092	1.745	1.784	1.993	0.095	1.628	1.633	1.643	0.093	1.666	1.534	1.681
	1 day, 11:00:12	37	1.545	1.708	1.729	0.092	1.543	1.531	1.55	0.094	1.639	1.581	1.702	0.092	1.717	1.551	1.873	0.092	1.62	1.573	1.528	0.092	2.057	2.059	2.002	0.092	1.536	1.84	1.745	0.287	1.482	1.558	1.535	0.093	2.011	1.986	1.895	0.092	1.745	1.786	1.993	0.095	1.629	1.633	1.643	0.093	1.666	1.535	1.681
	1 day, 11:15:12	37	1.546	1.708	1.729	0.092	1.547	1.536	1.554	0.094	1.635	1.578	1.704	0.092	1.717	1.552	1.875	0.092	1.62	1.575	1.528	0.092	2.055	2.058	2.001	0.092	1.537	1.841	1.745	0.289	1.484	1.559	1.546	0.094	2.005	1.984	1.891	0.092	1.745	1.786	1.994	0.095	1.63	1.635	1.644	0.093	1.666	1.537	1.681
	1 day, 11:30:12	37	1.545	1.707	1.729	0.092	1.551	1.542	1.561	0.094	1.629	1.575	1.704	0.092	1.716	1.553	1.875	0.092	1.625	1.575	1.529	0.092	2.051	2.057	2	0.092	1.538	1.841	1.745	0.29	1.494	1.562	1.557	0.094	1.997	1.984	1.897	0.092	1.745	1.787	1.994	0.095	1.631	1.636	1.644	0.093	1.666	1.536	1.681
	1 day, 11:45:12	37	1.545	1.706	1.729	0.093	1.555	1.546	1.562	0.094	1.627	1.571	1.702	0.092	1.716	1.554	1.877	0.092	1.626	1.577	1.53	0.092	2.05	2.056	1.999	0.092	1.538	1.841	1.745	0.292	1.492	1.563	1.564	0.094	1.991	1.982	1.897	0.092	1.745	1.789	1.995	0.095	1.631	1.637	1.644	0.093	1.666	1.537	1.68
	1 day, 12:00:12	36.9	1.546	1.706	1.729	0.092	1.559	1.55	1.568	0.094	1.623	1.568	1.7	0.092	1.716	1.555	1.877	0.092	1.632	1.578	1.53	0.092	2.049	2.055	1.998	0.091	1.539	1.84	1.745	0.294	1.5	1.567	1.557	0.094	1.984	1.981	1.897	0.092	1.745	1.789	1.996	0.095	1.632	1.638	1.644	0.093	1.666	1.538	1.68
	1 day, 12:15:12	37	1.545	1.704	1.728	0.092	1.564	1.556	1.572	0.094	1.619	1.565	1.699	0.092	1.715	1.556	1.877	0.092	1.633	1.579	1.533	0.092	2.045	2.055	1.997	0.091	1.54	1.842	1.744	0.295	1.497	1.566	1.556	0.093	1.974	1.98	1.897	0.092	1.745	1.79	1.996	0.095	1.633	1.639	1.644	0.093	1.666	1.538	1.68
	1 day, 12:30:12	37	1.545	1.703	1.728	0.092	1.568	1.561	1.575	0.094	1.615	1.563	1.698	0.092	1.716	1.557	1.878	0.092	1.639	1.58	1.534	0.092	2.043	2.055	1.997	0.091	1.54	1.843	1.745	0.299	1.513	1.573	1.548	0.094	1.973	1.98	1.897	0.092	1.744	1.792	1.995	0.095	1.634	1.639	1.644	0.093	1.665	1.539	1.68
	1 day, 12:45:12	37	1.545	1.703	1.727	0.093	1.573	1.57	1.58	0.094	1.612	1.56	1.686	0.092	1.716	1.557	1.879	0.092	1.639	1.583	1.534	0.092	2.04	2.054	1.996	0.092	1.541	1.843	1.745	0.301	1.507	1.573	1.557	0.094	1.971	1.979	1.897	0.092	1.745	1.793	1.994	0.095	1.634	1.641	1.645	0.093	1.665	1.54	1.68
	1 day, 13:00:12	37	1.546	1.702	1.727	0.093	1.577	1.573	1.582	0.094	1.608	1.557	1.684	0.092	1.715	1.558	1.88	0.092	1.645	1.584	1.537	0.092	2.04	2.052	1.996	0.092	1.542	1.842	1.745	0.304	1.512	1.576	1.567	0.094	1.97	1.978	1.897	0.092	1.745	1.794	1.993	0.095	1.635	1.641	1.644	0.093	1.665	1.54	1.679
	1 day, 13:15:12	37	1.546	1.7	1.726	0.093	1.581	1.577	1.589	0.094	1.605	1.555	1.685	0.092	1.715	1.559	1.88	0.092	1.644	1.587	1.54	0.092	2.035	2.049	1.995	0.092	1.543	1.842	1.745	0.306	1.512	1.578	1.581	0.093	1.97	1.978	1.897	0.092	1.745	1.794	1.992	0.095	1.636	1.642	1.644	0.093	1.665	1.54	1.68
	1 day, 13:30:12	37	1.546	1.7	1.726	0.092	1.585	1.581	1.591	0.094	1.602	1.553	1.686	0.092	1.714	1.559	1.881	0.092	1.65	1.588	1.541	0.092	2.033	2.048	1.993	0.091	1.544	1.844	1.745	0.309	1.512	1.581	1.585	0.093	1.968	1.977	1.897	0.092	1.745	1.795	1.992	0.095	1.637	1.643	1.644	0.093	1.664	1.541	1.68
	1 day, 13:45:12	37	1.546	1.699	1.725	0.092	1.587	1.588	1.597	0.094	1.6	1.55	1.686	0.092	1.714	1.56	1.881	0.092	1.649	1.589	1.542	0.092	2.027	2.048	1.992	0.092	1.544	1.843	1.745	0.309	1.526	1.581	1.578	0.094	1.968	1.976	1.897	0.092	1.744	1.796	1.991	0.095	1.638	1.644	1.644	0.093	1.664	1.541	1.679
	1 day, 14:00:12	37	1.546	1.697	1.725	0.092	1.59	1.594	1.599	0.094	1.595	1.548	1.686	0.092	1.713	1.561	1.881	0.092	1.654	1.591	1.542	0.092	2.024	2.046	1.991	0.091	1.545	1.839	1.745	0.311	1.524	1.584	1.587	0.093	1.967	1.975	1.897	0.092	1.744	1.797	1.989	0.095	1.638	1.645	1.644	0.093	1.664	1.541	1.679
	1 day, 14:15:12	37	1.546	1.696	1.724	0.092	1.595	1.597	1.606	0.094	1.592	1.547	1.685	0.092	1.713	1.561	1.882	0.092	1.653	1.595	1.544	0.092	2.02	2.044	1.99	0.092	1.546	1.836	1.745	0.314	1.542	1.584	1.592	0.094	1.966	1.974	1.892	0.092	1.744	1.798	1.989	0.095	1.639	1.646	1.644	0.093	1.664	1.542	1.679
	1 day, 14:30:12	37	1.546	1.695	1.724	0.093	1.599	1.603	1.605	0.094	1.589	1.545	1.688	0.092	1.713	1.562	1.882	0.092	1.657	1.596	1.546	0.092	2.018	2.042	1.988	0.092	1.546	1.833	1.745	0.317	1.532	1.588	1.602	0.094	1.964	1.969	1.89	0.092	1.744	1.798	1.988	0.095	1.639	1.647	1.644	0.093	1.664	1.542	1.678
	1 day, 14:45:12	36.9	1.546	1.694	1.724	0.093	1.603	1.603	1.613	0.094	1.586	1.543	1.689	0.092	1.712	1.563	1.883	0.092	1.656	1.598	1.548	0.092	2.012	2.041	1.987	0.092	1.547	1.835	1.744	0.319	1.545	1.592	1.619	0.094	1.961	1.966	1.887	0.092	1.744	1.8	1.988	0.095	1.64	1.647	1.645	0.093	1.664	1.543	1.678
	1 day, 15:00:12	37	1.546	1.693	1.723	0.092	1.606	1.608	1.611	0.094	1.583	1.541	1.688	0.092	1.712	1.562	1.884	0.092	1.66	1.599	1.55	0.092	2.007	2.039	1.986	0.091	1.547	1.833	1.745	0.32	1.54	1.603	1.603	0.093	1.961	1.964	1.892	0.092	1.744	1.8	1.987	0.095	1.641	1.648	1.644	0.093	1.664	1.543	1.678
	1 day, 15:15:12	37.1	1.546	1.692	1.722	0.093	1.609	1.611	1.617	0.094	1.58	1.539	1.687	0.092	1.712	1.563	1.885	0.092	1.659	1.6	1.55	0.092	2	2.037	1.985	0.091	1.548	1.832	1.744	0.323	1.552	1.601	1.622	0.093	1.959	1.959	1.891	0.092	1.744	1.801	1.986	0.095	1.641	1.648	1.643	0.093	1.664	1.544	1.678
	1 day, 15:30:12	37	1.546	1.691	1.722	0.092	1.61	1.614	1.616	0.094	1.578	1.537	1.685	0.092	1.711	1.563	1.887	0.092	1.664	1.601	1.55	0.092	1.994	2.035	1.983	0.091	1.548	1.83	1.744	0.326	1.553	1.614	1.626	0.094	1.956	1.956	1.889	0.092	1.744	1.802	1.986	0.095	1.642	1.649	1.643	0.093	1.663	1.544	1.677
	1 day, 15:45:12	37	1.546	1.69	1.721	0.092	1.615	1.616	1.623	0.094	1.575	1.535	1.683	0.092	1.71	1.564	1.889	0.092	1.661	1.603	1.552	0.092	1.989	2.035	1.982	0.091	1.549	1.828	1.744	0.327	1.552	1.607	1.622	0.094	1.953	1.954	1.889	0.092	1.743	1.802	1.985	0.095	1.642	1.65	1.643	0.093	1.663	1.545	1.677
	1 day, 16:00:12	37	1.546	1.688	1.721	0.092	1.615	1.622	1.624	0.094	1.573	1.533	1.683	0.092	1.71	1.564	1.894	0.092	1.667	1.603	1.554	0.092	1.988	2.032	1.981	0.091	1.549	1.827	1.744	0.33	1.579	1.617	1.631	0.093	1.948	1.953	1.888	0.092	1.743	1.803	1.985	0.095	1.642	1.65	1.643	0.093	1.663	1.545	1.677
	1 day, 16:15:12	37	1.547	1.687	1.72	0.093	1.621	1.621	1.627	0.094	1.571	1.531	1.681	0.092	1.709	1.565	1.883	0.092	1.666	1.607	1.555	0.092	1.986	2.032	1.978	0.092	1.55	1.826	1.744	0.331	1.571	1.617	1.614	0.094	1.952	1.954	1.887	0.092	1.743	1.804	1.985	0.095	1.643	1.651	1.643	0.093	1.663	1.545	1.677
	1 day, 16:30:12	37	1.546	1.686	1.719	0.092	1.621	1.625	1.626	0.094	1.568	1.529	1.68	0.092	1.709	1.565	1.884	0.092	1.669	1.607	1.555	0.092	1.983	2.032	1.975	0.091	1.552	1.823	1.743	0.333	1.589	1.619	1.6	0.094	1.95	1.965	1.887	0.092	1.742	1.804	1.984	0.095	1.643	1.651	1.643	0.093	1.662	1.546	1.676
	1 day, 16:45:12	37	1.546	1.685	1.719	0.092	1.625	1.626	1.627	0.094	1.565	1.527	1.678	0.092	1.708	1.566	1.883	0.092	1.669	1.609	1.558	0.092	1.982	2.03	1.975	0.091	1.552	1.822	1.743	0.335	1.586	1.618	1.591	0.093	1.949	1.969	1.883	0.092	1.742	1.805	1.983	0.095	1.644	1.652	1.643	0.093	1.662	1.546	1.675
	1 day, 17:00:12	36.9	1.546	1.684	1.718	0.093	1.622	1.63	1.629	0.094	1.563	1.525	1.675	0.092	1.707	1.566	1.887	0.092	1.674	1.609	1.559	0.092	1.978	2.029	1.974	0.092	1.552	1.82	1.743	0.337	1.594	1.619	1.568	0.094	1.947	1.972	1.881	0.092	1.742	1.806	1.982	0.095	1.645	1.653	1.642	0.093	1.662	1.546	1.676
	1 day, 17:15:12	37	1.546	1.683	1.718	0.093	1.627	1.631	1.63	0.094	1.56	1.524	1.67	0.092	1.706	1.567	1.883	0.092	1.67	1.612	1.559	0.092	1.975	2.028	1.973	0.091	1.553	1.818	1.743	0.34	1.589	1.621	1.577	0.093	1.944	1.972	1.879	0.092	1.741	1.806	1.982	0.095	1.645	1.653	1.643	0.093	1.662	1.546	1.675
	1 day, 17:30:12	37	1.546	1.681	1.717	0.093	1.626	1.635	1.632	0.094	1.558	1.522	1.664	0.092	1.706	1.567	1.883	0.092	1.676	1.612	1.56	0.092	1.972	2.026	1.972	0.091	1.553	1.817	1.742	0.341	1.6	1.627	1.558	0.094	1.941	1.973	1.878	0.092	1.741	1.807	1.981	0.095	1.645	1.654	1.642	0.093	1.662	1.547	1.675
	1 day, 17:45:12	37	1.546	1.681	1.716	0.093	1.629	1.635	1.63	0.094	1.555	1.52	1.652	0.092	1.705	1.568	1.883	0.092	1.673	1.613	1.562	0.092	1.97	2.025	1.97	0.091	1.554	1.816	1.742	0.344	1.585	1.63	1.622	0.094	1.939	1.974	1.876	0.092	1.741	1.807	1.981	0.095	1.646	1.654	1.642	0.093	1.661	1.547	1.675
	1 day, 18:00:12	37	1.546	1.679	1.716	0.092	1.629	1.635	1.634	0.094	1.553	1.518	1.645	0.092	1.704	1.568	1.883	0.092	1.677	1.615	1.563	0.092	1.968	2.023	1.967	0.092	1.554	1.815	1.742	0.344	1.603	1.632	1.556	0.094	1.935	1.983	1.876	0.092	1.74	1.807	1.98	0.095	1.646	1.655	1.642	0.093	1.662	1.547	1.674
	1 day, 18:15:12	37.1	1.546	1.678	1.715	0.093	1.631	1.638	1.637	0.094	1.55	1.517	1.64	0.092	1.704	1.569	1.881	0.092	1.676	1.616	1.561	0.092	1.968	2.022	1.965	0.091	1.554	1.814	1.742	0.346	1.599	1.632	1.584	0.094	1.931	1.982	1.875	0.092	1.74	1.808	1.98	0.095	1.647	1.655	1.642	0.093	1.662	1.547	1.674
	1 day, 18:30:12	37	1.545	1.677	1.714	0.092	1.63	1.638	1.641	0.094	1.548	1.515	1.636	0.092	1.703	1.57	1.878	0.092	1.68	1.617	1.563	0.092	1.966	2.02	1.964	0.091	1.555	1.813	1.741	0.349	1.61	1.639	1.572	0.093	1.928	1.981	1.873	0.092	1.74	1.808	1.978	0.095	1.648	1.656	1.643	0.093	1.661	1.548	1.673
	1 day, 18:45:12	37	1.545	1.676	1.713	0.092	1.632	1.642	1.642	0.094	1.546	1.512	1.633	0.092	1.702	1.57	1.876	0.092	1.677	1.617	1.565	0.092	1.964	2.019	1.963	0.091	1.555	1.813	1.741	0.352	1.607	1.639	1.609	0.094	1.922	1.981	1.872	0.092	1.739	1.809	1.977	0.095	1.648	1.656	1.643	0.093	1.661	1.548	1.673
	1 day, 19:00:12	37	1.546	1.675	1.712	0.093	1.633	1.641	1.647	0.094	1.544	1.511	1.631	0.092	1.702	1.57	1.873	0.092	1.682	1.619	1.565	0.093	1.964	2.019	1.962	0.092	1.556	1.812	1.74	0.355	1.613	1.643	1.545	0.093	1.919	1.981	1.871	0.092	1.739	1.809	1.976	0.095	1.648	1.657	1.643	0.093	1.661	1.548	1.673
	1 day, 19:15:12	37	1.545	1.674	1.712	0.093	1.634	1.647	1.647	0.094	1.542	1.509	1.629	0.092	1.701	1.571	1.871	0.092	1.68	1.62	1.563	0.093	1.96	2.018	1.961	0.092	1.557	1.812	1.741	0.354	1.618	1.648	1.551	0.094	1.916	1.981	1.871	0.092	1.739	1.81	1.974	0.095	1.649	1.657	1.642	0.093	1.661	1.549	1.673
	1 day, 19:30:12	37	1.545	1.672	1.711	0.092	1.635	1.64	1.647	0.094	1.54	1.508	1.628	0.092	1.7	1.571	1.87	0.092	1.686	1.621	1.566	0.092	1.957	2.015	1.959	0.092	1.557	1.811	1.74	0.358	1.619	1.651	1.57	0.093	1.911	1.98	1.87	0.092	1.738	1.81	1.972	0.095	1.649	1.658	1.643	0.093	1.661	1.549	1.672
	1 day, 19:45:12	37	1.545	1.671	1.71	0.093	1.635	1.647	1.654	0.094	1.538	1.506	1.626	0.092	1.699	1.571	1.869	0.092	1.682	1.623	1.566	0.092	1.954	2.015	1.958	0.091	1.558	1.811	1.74	0.36	1.619	1.652	1.546	0.093	1.908	1.979	1.869	0.092	1.738	1.811	1.97	0.095	1.65	1.658	1.642	0.093	1.662	1.55	1.672
	1 day, 20:00:12	37	1.545	1.67	1.709	0.093	1.638	1.639	1.654	0.094	1.536	1.504	1.624	0.092	1.698	1.572	1.867	0.092	1.686	1.623	1.564	0.092	1.952	2.015	1.957	0.091	1.557	1.81	1.74	0.359	1.625	1.658	1.559	0.093	1.905	1.978	1.867	0.092	1.738	1.811	1.97	0.095	1.65	1.659	1.643	0.093	1.662	1.55	1.672
	1 day, 20:15:12	37	1.545	1.669	1.708	0.092	1.636	1.641	1.651	0.094	1.533	1.502	1.622	0.092	1.697	1.572	1.865	0.092	1.685	1.624	1.565	0.092	1.951	2.013	1.955	0.091	1.558	1.81	1.739	0.361	1.624	1.659	1.538	0.093	1.9	1.976	1.866	0.092	1.737	1.811	1.969	0.095	1.651	1.659	1.643	0.093	1.661	1.55	1.671
	1 day, 20:30:12	37	1.545	1.668	1.708	0.093	1.637	1.637	1.654	0.094	1.531	1.5	1.62	0.092	1.697	1.572	1.865	0.092	1.688	1.625	1.567	0.093	1.948	2.011	1.953	0.092	1.558	1.81	1.739	0.365	1.631	1.676	1.534	0.094	1.897	1.976	1.866	0.092	1.737	1.812	1.969	0.095	1.651	1.66	1.643	0.093	1.661	1.551	1.671
	1 day, 20:45:12	37	1.544	1.666	1.706	0.092	1.632	1.638	1.649	0.094	1.528	1.498	1.619	0.092	1.696	1.572	1.864	0.092	1.685	1.626	1.567	0.092	1.945	2.01	1.951	0.091	1.558	1.81	1.738	0.368	1.638	1.677	1.534	0.093	1.893	1.978	1.864	0.092	1.737	1.812	1.968	0.095	1.651	1.66	1.643	0.093	1.661	1.551	1.67
	1 day, 21:00:12	37	1.544	1.666	1.706	0.093	1.635	1.631	1.665	0.094	1.527	1.496	1.62	0.092	1.695	1.573	1.863	0.092	1.689	1.627	1.565	0.093	1.943	2.009	1.949	0.091	1.559	1.81	1.737	0.37	1.629	1.695	1.539	0.094	1.89	1.978	1.864	0.092	1.736	1.813	1.967	0.095	1.652	1.661	1.643	0.093	1.661	1.551	1.67
	1 day, 21:15:12	37	1.544	1.664	1.705	0.092	1.632	1.633	1.656	0.094	1.524	1.494	1.618	0.092	1.694	1.573	1.862	0.092	1.686	1.628	1.567	0.092	1.94	2.007	1.947	0.091	1.559	1.81	1.737	0.372	1.619	1.687	1.56	0.093	1.887	1.981	1.863	0.092	1.736	1.813	1.967	0.095	1.653	1.661	1.643	0.093	1.66	1.552	1.67
	1 day, 21:30:12	37	1.544	1.663	1.704	0.093	1.632	1.633	1.662	0.094	1.522	1.492	1.616	0.092	1.692	1.573	1.861	0.092	1.691	1.629	1.57	0.093	1.937	2.007	1.946	0.091	1.56	1.81	1.737	0.374	1.621	1.691	1.554	0.094	1.884	1.98	1.862	0.092	1.736	1.813	1.966	0.095	1.653	1.662	1.642	0.093	1.66	1.552	1.669
	1 day, 21:45:12	37	1.543	1.662	1.703	0.092	1.629	1.635	1.673	0.094	1.52	1.49	1.614	0.092	1.692	1.574	1.86	0.092	1.687	1.629	1.568	0.092	1.935	2.006	1.943	0.091	1.56	1.809	1.736	0.377	1.619	1.707	1.546	0.093	1.882	1.98	1.86	0.092	1.735	1.813	1.965	0.095	1.653	1.662	1.643	0.093	1.66	1.552	1.668
	1 day, 22:00:12	37	1.543	1.661	1.702	0.093	1.63	1.628	1.676	0.094	1.517	1.488	1.612	0.092	1.69	1.574	1.859	0.092	1.692	1.63	1.568	0.092	1.931	2.005	1.94	0.092	1.561	1.81	1.735	0.38	1.626	1.716	1.54	0.094	1.881	1.975	1.859	0.092	1.735	1.814	1.965	0.095	1.653	1.662	1.642	0.093	1.66	1.553	1.668
	1 day, 22:15:12	37	1.543	1.66	1.701	0.092	1.627	1.63	1.624	0.094	1.515	1.486	1.611	0.092	1.69	1.574	1.858	0.092	1.689	1.63	1.569	0.092	1.929	2.004	1.936	0.091	1.562	1.809	1.735	0.384	1.629	1.706	1.547	0.093	1.878	1.972	1.857	0.092	1.734	1.814	1.964	0.095	1.654	1.663	1.642	0.093	1.66	1.553	1.667
	1 day, 22:30:12	37	1.542	1.659	1.7	0.092	1.625	1.627	1.624	0.094	1.512	1.484	1.609	0.092	1.688	1.574	1.856	0.092	1.693	1.63	1.571	0.092	1.925	2.004	1.935	0.091	1.562	1.808	1.735	0.388	1.616	1.72	1.54	0.093	1.875	1.971	1.856	0.092	1.733	1.814	1.963	0.095	1.654	1.663	1.642	0.093	1.659	1.553	1.667
	1 day, 22:45:12	37	1.542	1.657	1.699	0.093	1.625	1.623	1.647	0.094	1.51	1.481	1.606	0.092	1.688	1.575	1.855	0.092	1.688	1.631	1.571	0.093	1.922	2.005	1.931	0.091	1.563	1.808	1.734	0.387	1.632	1.71	1.543	0.093	1.873	1.972	1.855	0.092	1.734	1.815	1.962	0.095	1.655	1.663	1.643	0.093	1.659	1.554	1.667
	1 day, 23:00:12	36.9	1.542	1.656	1.698	0.093	1.623	1.622	1.625	0.094	1.508	1.479	1.605	0.092	1.687	1.575	1.854	0.092	1.693	1.633	1.57	0.092	1.916	2.005	1.93	0.091	1.563	1.808	1.734	0.393	1.633	1.699	1.545	0.093	1.87	1.971	1.854	0.092	1.733	1.815	1.962	0.095	1.655	1.664	1.643	0.093	1.659	1.555	1.666
	1 day, 23:15:12	37	1.542	1.655	1.697	0.092	1.623	1.619	1.635	0.093	1.506	1.476	1.602	0.092	1.686	1.575	1.853	0.092	1.69	1.634	1.57	0.092	1.912	2.007	1.928	0.091	1.563	1.807	1.733	0.398	1.637	1.674	1.554	0.093	1.869	1.969	1.853	0.092	1.732	1.815	1.961	0.095	1.655	1.664	1.643	0.093	1.659	1.555	1.665
	1 day, 23:30:12	37	1.542	1.654	1.696	0.092	1.624	1.618	1.65	0.094	1.503	1.474	1.6	0.092	1.685	1.576	1.852	0.092	1.694	1.633	1.572	0.092	1.905	2.012	1.926	0.091	1.564	1.807	1.733	0.4	1.635	1.687	1.539	0.093	1.865	1.968	1.853	0.092	1.732	1.816	1.96	0.095	1.655	1.664	1.642	0.093	1.659	1.555	1.665
	1 day, 23:45:12	37	1.541	1.653	1.696	0.093	1.624	1.614	1.626	0.094	1.501	1.472	1.598	0.092	1.684	1.576	1.851	0.092	1.69	1.634	1.573	0.093	1.901	2.01	1.925	0.092	1.564	1.806	1.732	0.402	1.628	1.651	1.546	0.094	1.863	1.968	1.851	0.092	1.731	1.816	1.959	0.095	1.656	1.665	1.642	0.093	1.659	1.556	1.665
	2 days, 0:00:12	37	1.541	1.652	1.695	0.093	1.623	1.613	1.623	0.094	1.498	1.469	1.592	0.092	1.683	1.577	1.85	0.092	1.694	1.634	1.573	0.092	1.897	2.009	1.923	0.092	1.565	1.806	1.731	0.41	1.616	1.649	1.539	0.094	1.86	1.972	1.85	0.092	1.731	1.816	1.958	0.095	1.656	1.665	1.642	0.093	1.659	1.556	1.664
	2 days, 0:15:12	37	1.54	1.651	1.694	0.092	1.624	1.608	1.619	0.094	1.496	1.466	1.589	0.092	1.682	1.577	1.849	0.092	1.692	1.635	1.571	0.092	1.892	2.008	1.922	0.092	1.565	1.805	1.73	0.414	1.612	1.66	1.544	0.093	1.857	1.972	1.849	0.092	1.73	1.817	1.957	0.095	1.656	1.666	1.643	0.093	1.658	1.555	1.663
	2 days, 0:30:12	37	1.54	1.65	1.693	0.092	1.623	1.606	1.618	0.093	1.494	1.463	1.587	0.092	1.681	1.577	1.848	0.092	1.695	1.635	1.572	0.092	1.888	2.007	1.92	0.091	1.565	1.805	1.73	0.416	1.592	1.659	1.543	0.093	1.856	1.972	1.848	0.092	1.729	1.817	1.956	0.095	1.657	1.666	1.642	0.093	1.658	1.556	1.663
	2 days, 0:45:12	37	1.539	1.649	1.692	0.092	1.623	1.606	1.613	0.094	1.491	1.461	1.585	0.092	1.679	1.577	1.847	0.092	1.691	1.635	1.573	0.092	1.894	2.008	1.919	0.091	1.566	1.804	1.729	0.419	1.559	1.646	1.537	0.093	1.855	1.972	1.847	0.092	1.729	1.817	1.955	0.095	1.657	1.667	1.642	0.093	1.658	1.556	1.662
	2 days, 1:00:12	36.9	1.539	1.648	1.691	0.092	1.623	1.604	1.609	0.094	1.489	1.458	1.583	0.092	1.679	1.577	1.846	0.092	1.695	1.636	1.574	0.092	1.895	2.003	1.916	0.091	1.566	1.804	1.728	0.423	1.578	1.662	1.541	0.093	1.853	1.973	1.846	0.092	1.728	1.818	1.954	0.095	1.657	1.667	1.642	0.093	1.658	1.556	1.661
	2 days, 1:15:12	37	1.538	1.647	1.69	0.092	1.624	1.601	1.612	0.094	1.487	1.455	1.581	0.092	1.677	1.578	1.846	0.092	1.692	1.636	1.575	0.092	1.899	2.003	1.914	0.091	1.568	1.803	1.728	0.427	1.601	1.66	1.541	0.093	1.85	1.971	1.845	0.092	1.728	1.818	1.954	0.095	1.657	1.668	1.642	0.093	1.658	1.557	1.661
	2 days, 1:30:12	37	1.538	1.646	1.689	0.093	1.627	1.596	1.598	0.094	1.485	1.453	1.58	0.092	1.676	1.579	1.845	0.092	1.696	1.636	1.575	0.092	1.904	1.999	1.912	0.092	1.568	1.803	1.728	0.431	1.605	1.652	1.549	0.094	1.849	1.971	1.843	0.092	1.728	1.819	1.953	0.095	1.658	1.668	1.642	0.093	1.658	1.557	1.66
	2 days, 1:45:12	37	1.537	1.645	1.688	0.092	1.628	1.592	1.588	0.094	1.482	1.45	1.578	0.092	1.675	1.578	1.844	0.092	1.694	1.637	1.574	0.092	1.906	1.997	1.91	0.091	1.569	1.802	1.727	0.44	1.602	1.649	1.542	0.093	1.846	1.971	1.842	0.092	1.726	1.819	1.952	0.095	1.658	1.669	1.642	0.093	1.657	1.558	1.659
	2 days, 2:00:12	37	1.537	1.644	1.688	0.093	1.631	1.588	1.59	0.094	1.48	1.447	1.576	0.092	1.674	1.579	1.843	0.092	1.696	1.638	1.573	0.092	1.906	1.997	1.908	0.091	1.57	1.802	1.726	0.442	1.626	1.626	1.541	0.094	1.844	1.972	1.841	0.092	1.726	1.819	1.952	0.095	1.658	1.669	1.642	0.093	1.658	1.558	1.659
	2 days, 2:15:12	37	1.537	1.643	1.687	0.093	1.632	1.588	1.591	0.094	1.477	1.445	1.574	0.092	1.673	1.579	1.842	0.092	1.694	1.638	1.574	0.092	1.907	1.996	1.907	0.091	1.57	1.801	1.725	0.449	1.603	1.634	1.544	0.093	1.842	1.972	1.84	0.092	1.726	1.819	1.951	0.095	1.659	1.67	1.642	0.093	1.658	1.558	1.658
	2 days, 2:30:12	37	1.536	1.642	1.685	0.092	1.632	1.583	1.591	0.094	1.475	1.442	1.572	0.092	1.672	1.579	1.841	0.092	1.697	1.639	1.577	0.092	1.908	1.994	1.906	0.091	1.57	1.801	1.725	0.453	1.625	1.636	1.541	0.093	1.84	1.971	1.838	0.092	1.725	1.82	1.95	0.095	1.659	1.671	1.643	0.093	1.657	1.558	1.658
	2 days, 2:45:12	37	1.536	1.64	1.685	0.093	1.635	1.573	1.593	0.094	1.472	1.439	1.569	0.092	1.671	1.579	1.84	0.092	1.693	1.638	1.577	0.092	1.908	1.993	1.904	0.091	1.571	1.8	1.724	0.461	1.561	1.644	1.541	0.093	1.837	1.966	1.837	0.092	1.724	1.819	1.95	0.095	1.659	1.671	1.643	0.093	1.658	1.558	1.657
	2 days, 3:00:12	37	1.536	1.639	1.684	0.092	1.635	1.579	1.592	0.094	1.47	1.436	1.568	0.092	1.67	1.58	1.839	0.092	1.697	1.639	1.577	0.092	1.909	1.991	1.917	0.091	1.571	1.799	1.724	0.46	1.54	1.636	1.543	0.093	1.836	1.963	1.836	0.092	1.724	1.82	1.949	0.095	1.659	1.671	1.643	0.093	1.658	1.558	1.657
	2 days, 3:15:12	37	1.535	1.638	1.683	0.093	1.637	1.579	1.595	0.094	1.466	1.433	1.566	0.092	1.669	1.58	1.839	0.092	1.694	1.639	1.577	0.092	1.91	1.99	1.917	0.091	1.571	1.799	1.723	0.467	1.552	1.638	1.541	0.093	1.832	1.962	1.834	0.092	1.723	1.82	1.948	0.095	1.66	1.672	1.643	0.093	1.658	1.559	1.656
	2 days, 3:30:12	37	1.534	1.637	1.682	0.093	1.64	1.573	1.596	0.093	1.464	1.429	1.564	0.092	1.668	1.58	1.838	0.092	1.696	1.642	1.576	0.092	1.91	1.987	1.916	0.091	1.571	1.798	1.723	0.476	1.577	1.647	1.546	0.093	1.831	1.962	1.833	0.092	1.723	1.82	1.948	0.095	1.659	1.671	1.643	0.093	1.657	1.559	1.655
	2 days, 3:45:12	37	1.534	1.636	1.681	0.092	1.641	1.577	1.596	0.093	1.461	1.426	1.562	0.092	1.667	1.581	1.837	0.092	1.694	1.64	1.575	0.092	1.911	1.986	1.915	0.091	1.572	1.798	1.722	0.482	1.533	1.613	1.543	0.093	1.829	1.961	1.831	0.092	1.722	1.82	1.947	0.095	1.66	1.672	1.643	0.093	1.657	1.559	1.655
	2 days, 4:00:12	37	1.533	1.635	1.68	0.093	1.642	1.577	1.594	0.094	1.459	1.423	1.56	0.092	1.666	1.581	1.836	0.092	1.696	1.641	1.577	0.092	1.911	1.983	1.915	0.091	1.572	1.797	1.721	0.485	1.602	1.644	1.544	0.093	1.828	1.959	1.83	0.092	1.722	1.821	1.946	0.095	1.66	1.672	1.643	0.093	1.657	1.56	1.655
	2 days, 4:15:12	37	1.533	1.634	1.679	0.092	1.642	1.581	1.599	0.093	1.456	1.42	1.558	0.092	1.665	1.581	1.835	0.092	1.695	1.642	1.578	0.092	1.909	1.981	1.914	0.091	1.573	1.796	1.72	0.491	1.549	1.637	1.539	0.093	1.825	1.958	1.828	0.092	1.721	1.821	1.946	0.095	1.66	1.673	1.642	0.093	1.657	1.56	1.654
	2 days, 4:30:12	37	1.532	1.633	1.678	0.093	1.643	1.582	1.596	0.094	1.454	1.417	1.556	0.092	1.664	1.581	1.835	0.092	1.696	1.642	1.579	0.092	1.91	1.98	1.914	0.091	1.574	1.796	1.72	0.491	1.522	1.621	1.542	0.094	1.822	1.956	1.827	0.092	1.721	1.821	1.945	0.095	1.661	1.673	1.643	0.093	1.657	1.56	1.654
	2 days, 4:45:12	37.1	1.531	1.632	1.677	0.092	1.643	1.579	1.597	0.093	1.451	1.413	1.554	0.092	1.663	1.581	1.833	0.092	1.696	1.641	1.58	0.092	1.908	1.976	1.913	0.091	1.574	1.795	1.719	0.5	1.567	1.691	1.548	0.093	1.819	1.955	1.825	0.092	1.72	1.821	1.945	0.095	1.661	1.674	1.643	0.093	1.656	1.561	1.653
	2 days, 5:00:12	37	1.531	1.631	1.677	0.092	1.643	1.584	1.598	0.094	1.448	1.411	1.552	0.092	1.661	1.582	1.833	0.092	1.697	1.643	1.58	0.092	1.908	1.974	1.909	0.091	1.575	1.794	1.719	0.502	1.563	1.67	1.537	0.094	1.817	1.955	1.824	0.092	1.719	1.821	1.944	0.095	1.661	1.674	1.643	0.093	1.656	1.56	1.653
	2 days, 5:15:12	37	1.53	1.629	1.676	0.092	1.642	1.582	1.592	0.093	1.446	1.407	1.549	0.092	1.66	1.582	1.832	0.092	1.696	1.643	1.579	0.092	1.907	1.972	1.907	0.091	1.575	1.794	1.718	0.511	1.515	1.645	1.541	0.093	1.815	1.953	1.822	0.092	1.719	1.821	1.944	0.095	1.661	1.675	1.643	0.093	1.656	1.561	1.653
	2 days, 5:30:12	37	1.53	1.629	1.675	0.093	1.641	1.584	1.597	0.093	1.443	1.403	1.547	0.092	1.66	1.582	1.832	0.092	1.698	1.644	1.578	0.092	1.907	1.971	1.904	0.091	1.575	1.793	1.717	0.515	1.537	1.634	1.55	0.094	1.813	1.953	1.82	0.092	1.719	1.821	1.942	0.095	1.662	1.675	1.643	0.093	1.656	1.562	1.652
	2 days, 5:45:12	37	1.529	1.628	1.674	0.093	1.637	1.584	1.591	0.094	1.44	1.4	1.545	0.092	1.658	1.582	1.831	0.092	1.698	1.643	1.578	0.092	1.907	1.968	1.903	0.091	1.576	1.793	1.716	0.516	1.557	1.645	1.548	0.093	1.811	1.952	1.819	0.092	1.718	1.822	1.942	0.095	1.662	1.676	1.643	0.093	1.656	1.562	1.652
	2 days, 6:00:12	37	1.528	1.626	1.673	0.092	1.632	1.582	1.594	0.093	1.437	1.396	1.542	0.092	1.657	1.581	1.83	0.092	1.699	1.644	1.578	0.092	1.907	1.966	1.902	0.091	1.576	1.792	1.716	0.524	1.585	1.592	1.545	0.093	1.808	1.952	1.816	0.092	1.718	1.822	1.94	0.095	1.662	1.676	1.643	0.093	1.656	1.562	1.651
	2 days, 6:15:12	37	1.527	1.625	1.672	0.093	1.628	1.584	1.588	0.094	1.435	1.393	1.54	0.092	1.656	1.582	1.829	0.092	1.697	1.645	1.579	0.092	1.907	1.964	1.898	0.091	1.577	1.792	1.715	0.529	1.562	1.71	1.542	0.094	1.807	1.951	1.815	0.092	1.717	1.822	1.939	0.095	1.663	1.676	1.643	0.093	1.656	1.563	1.651
	2 days, 6:30:12	37	1.527	1.624	1.671	0.093	1.627	1.581	1.59	0.093	1.431	1.39	1.536	0.092	1.655	1.582	1.829	0.092	1.697	1.645	1.581	0.092	1.906	1.964	1.897	0.091	1.577	1.791	1.714	0.532	1.517	1.577	1.54	0.093	1.806	1.95	1.813	0.092	1.716	1.822	1.938	0.095	1.663	1.677	1.643	0.093	1.656	1.564	1.65
	2 days, 6:45:12	37	1.526	1.623	1.67	0.093	1.625	1.582	1.583	0.093	1.429	1.386	1.534	0.092	1.653	1.583	1.827	0.092	1.697	1.645	1.582	0.092	1.906	1.96	1.895	0.091	1.578	1.791	1.714	0.094	1.566	1.675	1.544	0.094	1.805	1.949	1.811	0.092	1.716	1.823	1.937	0.095	1.663	1.676	1.643	0.093	1.655	1.564	1.649
	2 days, 7:00:12	37	1.525	1.622	1.669	0.093	1.623	1.577	1.583	0.094	1.425	1.383	1.531	0.092	1.653	1.583	1.827	0.092	1.697	1.646	1.582	0.092	1.905	1.958	1.893	0.091	1.577	1.79	1.713	0.094	1.56	1.609	1.544	0.093	1.803	1.948	1.809	0.092	1.716	1.822	1.936	0.095	1.663	1.677	1.643	0.093	1.655	1.564	1.649
	2 days, 7:15:12	37	1.524	1.621	1.669	0.092	1.622	1.575	1.579	0.093	1.422	1.379	1.529	0.092	1.651	1.583	1.826	0.092	1.698	1.646	1.583	0.092	1.904	1.956	1.891	0.091	1.579	1.789	1.712	0.094	1.543	1.648	1.543	0.093	1.801	1.948	1.807	0.092	1.714	1.822	1.935	0.095	1.664	1.676	1.643	0.093	1.655	1.564	1.648
	2 days, 7:30:12	37	1.524	1.62	1.668	0.092	1.622	1.573	1.574	0.093	1.42	1.376	1.526	0.092	1.65	1.583	1.825	0.092	1.699	1.646	1.581	0.092	1.903	1.954	1.889	0.091	1.579	1.788	1.712	0.094	1.515	1.615	1.54	0.093	1.799	1.947	1.805	0.092	1.714	1.822	1.935	0.095	1.664	1.676	1.643	0.093	1.655	1.564	1.648
	2 days, 7:45:12	37.1	1.523	1.619	1.667	0.092	1.623	1.569	1.574	0.093	1.417	1.372	1.524	0.092	1.649	1.584	1.825	0.092	1.7	1.648	1.58	0.092	1.902	1.951	1.887	0.091	1.579	1.787	1.711	0.094	1.57	1.685	1.545	0.093	1.798	1.945	1.803	0.092	1.713	1.823	1.934	0.095	1.664	1.676	1.642	0.093	1.655	1.564	1.647
	2 days, 8:00:12	37	1.522	1.617	1.666	0.093	1.625	1.566	1.574	0.093	1.414	1.368	1.522	0.092	1.648	1.584	1.824	0.092	1.699	1.649	1.579	0.092	1.902	1.949	1.886	0.091	1.579	1.787	1.71	0.094	1.534	1.623	1.544	0.094	1.796	1.944	1.8	0.092	1.713	1.823	1.933	0.095	1.664	1.676	1.643	0.093	1.654	1.564	1.647
	2 days, 8:15:12	37	1.522	1.617	1.665	0.092	1.627	1.564	1.573	0.093	1.412	1.364	1.519	0.092	1.647	1.584	1.824	0.092	1.7	1.649	1.579	0.092	1.901	1.946	1.882	0.091	1.58	1.786	1.71	0.094	1.579	1.628	1.575	0.094	1.794	1.942	1.798	0.092	1.712	1.823	1.932	0.095	1.664	1.675	1.642	0.093	1.655	1.564	1.646
	2 days, 8:30:12	37	1.521	1.615	1.664	0.092	1.628	1.556	1.574	0.093	1.409	1.361	1.517	0.092	1.646	1.584	1.823	0.092	1.7	1.649	1.58	0.092	1.901	1.944	1.88	0.091	1.58	1.786	1.709	0.094	1.556	1.627	1.545	0.093	1.794	1.941	1.796	0.092	1.712	1.822	1.931	0.095	1.665	1.676	1.642	0.093	1.654	1.565	1.645
	2 days, 8:45:12	37	1.521	1.614	1.664	0.092	1.637	1.554	1.577	0.093	1.406	1.356	1.515	0.091	1.645	1.584	1.823	0.092	1.7	1.648	1.582	0.092	1.901	1.941	1.879	0.091	1.58	1.785	1.708	0.094	1.546	1.661	1.545	0.093	1.793	1.94	1.794	0.092	1.711	1.823	1.931	0.095	1.665	1.676	1.642	0.093	1.654	1.565	1.644
	2 days, 9:00:12	37	1.52	1.613	1.663	0.093	1.649	1.554	1.587	0.093	1.404	1.352	1.513	0.092	1.644	1.585	1.823	0.092	1.7	1.649	1.583	0.092	1.9	1.937	1.877	0.091	1.581	1.784	1.708	0.094	1.558	1.638	1.547	0.094	1.793	1.938	1.792	0.092	1.711	1.823	1.93	0.095	1.665	1.675	1.643	0.093	1.654	1.565	1.644
	2 days, 9:15:12	37	1.52	1.612	1.662	0.093	1.659	1.554	1.593	0.094	1.401	1.349	1.51	0.092	1.643	1.585	1.822	0.092	1.701	1.65	1.583	0.092	1.9	1.935	1.877	0.091	1.582	1.784	1.707	0.094	1.563	1.7	1.569	0.094	1.792	1.937	1.79	0.092	1.71	1.823	1.93	0.095	1.665	1.675	1.642	0.093	1.654	1.565	1.644
	2 days, 9:30:12	37	1.518	1.611	1.661	0.092	1.672	1.554	1.6	0.093	1.398	1.344	1.508	0.092	1.642	1.585	1.822	0.092	1.7	1.649	1.581	0.092	1.899	1.933	1.874	0.091	1.582	1.783	1.706	0.094	1.598	1.657	1.549	0.093	1.791	1.935	1.787	0.092	1.709	1.823	1.929	0.095	1.665	1.675	1.642	0.093	1.654	1.566	1.643
	2 days, 9:45:12	37	1.518	1.61	1.661	0.092	1.681	1.56	1.608	0.093	1.395	1.341	1.506	0.092	1.641	1.586	1.821	0.092	1.701	1.651	1.579	0.092	1.899	1.929	1.871	0.091	1.582	1.783	1.705	0.094	1.579	1.678	1.544	0.093	1.79	1.934	1.785	0.092	1.709	1.823	1.928	0.095	1.665	1.675	1.642	0.093	1.654	1.565	1.643
	2 days, 10:00:12	37	1.517	1.608	1.66	0.092	1.69	1.566	1.633	0.094	1.393	1.336	1.504	0.092	1.64	1.585	1.821	0.092	1.702	1.65	1.578	0.093	1.897	1.927	1.87	0.091	1.583	1.782	1.704	0.094	1.555	1.652	1.543	0.093	1.789	1.933	1.782	0.092	1.708	1.823	1.927	0.095	1.666	1.674	1.642	0.093	1.653	1.567	1.642
	2 days, 10:15:12	37	1.516	1.608	1.659	0.093	1.699	1.569	1.63	0.094	1.39	1.333	1.501	0.092	1.639	1.586	1.821	0.092	1.702	1.653	1.581	0.092	1.897	1.924	1.869	0.091	1.583	1.782	1.704	0.094	1.523	1.661	1.543	0.094	1.788	1.932	1.78	0.092	1.708	1.823	1.926	0.095	1.665	1.674	1.643	0.093	1.653	1.567	1.641
	2 days, 10:30:12	37.1	1.515	1.606	1.658	0.093	1.705	1.582	1.658	0.094	1.388	1.329	1.498	0.092	1.638	1.586	1.82	0.092	1.702	1.654	1.582	0.092	1.896	1.92	1.869	0.091	1.583	1.781	1.703	0.094	1.57	1.663	1.543	0.094	1.787	1.931	1.778	0.092	1.706	1.823	1.926	0.095	1.666	1.675	1.642	0.093	1.653	1.567	1.64
	2 days, 10:45:12	37	1.514	1.605	1.657	0.092	1.711	1.605	1.658	0.094	1.385	1.325	1.496	0.092	1.637	1.586	1.819	0.092	1.703	1.655	1.577	0.092	1.895	1.919	1.868	0.091	1.583	1.78	1.702	0.094	1.528	1.719	1.556	0.093	1.786	1.928	1.775	0.092	1.706	1.823	1.925	0.095	1.666	1.675	1.642	0.093	1.652	1.567	1.64
	2 days, 11:00:12	37	1.513	1.604	1.656	0.092	1.72	1.632	1.697	0.094	1.382	1.322	1.493	0.092	1.635	1.586	1.819	0.092	1.703	1.655	1.577	0.092	1.894	1.916	1.866	0.091	1.583	1.78	1.701	0.094	1.615	1.697	1.547	0.094	1.786	1.926	1.773	0.092	1.706	1.823	1.924	0.095	1.666	1.675	1.642	0.093	1.652	1.567	1.639
	2 days, 11:15:12	37	1.513	1.603	1.655	0.093	1.731	1.62	1.706	0.094	1.38	1.318	1.491	0.092	1.635	1.586	1.818	0.092	1.705	1.655	1.577	0.092	1.893	1.913	1.864	0.091	1.583	1.779	1.701	0.094	1.595	1.716	1.552	0.094	1.784	1.923	1.771	0.092	1.705	1.823	1.923	0.095	1.666	1.675	1.642	0.093	1.652	1.567	1.639
	2 days, 11:30:12	37	1.512	1.602	1.654	0.093	1.728	1.659	1.696	0.093	1.377	1.315	1.488	0.092	1.633	1.586	1.817	0.092	1.704	1.654	1.571	0.092	1.892	1.912	1.862	0.091	1.584	1.778	1.7	0.094	1.613	1.722	1.581	0.093	1.784	1.92	1.768	0.092	1.704	1.823	1.922	0.095	1.667	1.675	1.642	0.093	1.652	1.568	1.638
	2 days, 11:45:12	37	1.511	1.601	1.653	0.092	1.734	1.678	1.723	0.093	1.375	1.312	1.486	0.091	1.632	1.586	1.817	0.092	1.704	1.656	1.575	0.092	1.891	1.908	1.86	0.091	1.584	1.777	1.7	0.094	1.58	1.705	1.56	0.093	1.782	1.917	1.766	0.092	1.703	1.823	1.921	0.095	1.667	1.675	1.641	0.093	1.652	1.568	1.637
	2 days, 12:00:12	36.9	1.51	1.6	1.652	0.092	1.735	1.687	1.707	0.093	1.372	1.308	1.484	0.092	1.631	1.586	1.816	0.092	1.702	1.655	1.571	0.092	1.889	1.907	1.859	0.091	1.584	1.777	1.699	0.094	1.568	1.735	1.547	0.093	1.781	1.914	1.764	0.092	1.703	1.823	1.921	0.095	1.667	1.675	1.642	0.093	1.651	1.569	1.636
	2 days, 12:15:12	37	1.509	1.599	1.651	0.092	1.736	1.696	1.714	0.093	1.37	1.305	1.481	0.091	1.631	1.587	1.815	0.092	1.703	1.655	1.569	0.092	1.889	1.902	1.856	0.091	1.584	1.776	1.698	0.094	1.573	1.748	1.551	0.093	1.78	1.911	1.762	0.092	1.702	1.823	1.92	0.095	1.667	1.674	1.642	0.093	1.651	1.569	1.636
	2 days, 12:30:12	37	1.508	1.597	1.65	0.092	1.734	1.695	1.715	0.093	1.368	1.302	1.479	0.092	1.63	1.587	1.815	0.092	1.704	1.655	1.571	0.092	1.888	1.879	1.854	0.091	1.586	1.775	1.698	0.094	1.574	1.75	1.557	0.093	1.779	1.909	1.759	0.092	1.701	1.823	1.919	0.095	1.667	1.674	1.642	0.093	1.651	1.569	1.635
	2 days, 12:45:12	37	1.508	1.597	1.649	0.093	1.732	1.698	1.694	0.093	1.365	1.298	1.477	0.091	1.628	1.587	1.814	0.092	1.707	1.654	1.571	0.092	1.887	1.863	1.853	0.091	1.586	1.774	1.697	0.094	1.555	1.747	1.553	0.093	1.778	1.906	1.757	0.092	1.7	1.823	1.919	0.095	1.667	1.674	1.642	0.093	1.651	1.57	1.635
	2 days, 13:00:12	37	1.507	1.596	1.648	0.092	1.733	1.698	1.706	0.094	1.363	1.295	1.475	0.092	1.627	1.587	1.813	0.092	1.708	1.655	1.571	0.092	1.887	1.855	1.85	0.091	1.586	1.774	1.696	0.094	1.59	1.754	1.547	0.094	1.777	1.904	1.755	0.092	1.699	1.822	1.918	0.095	1.668	1.674	1.641	0.093	1.65	1.57	1.634
	2 days, 13:15:12	37	1.507	1.595	1.647	0.093	1.74	1.706	1.713	0.093	1.361	1.292	1.472	0.092	1.626	1.587	1.813	0.092	1.708	1.653	1.569	0.093	1.885	1.845	1.852	0.091	1.587	1.773	1.695	0.094	1.577	1.766	1.549	0.093	1.776	1.9	1.753	0.092	1.698	1.822	1.917	0.095	1.668	1.674	1.641	0.093	1.65	1.571	1.633
	2 days, 13:30:12	37	1.505	1.593	1.646	0.092	1.744	1.7	1.707	0.093	1.359	1.289	1.47	0.091	1.625	1.587	1.812	0.092	1.707	1.654	1.57	0.092	1.884	1.838	1.853	0.091	1.587	1.773	1.695	0.094	1.571	1.765	1.55	0.094	1.775	1.898	1.75	0.092	1.697	1.822	1.916	0.095	1.669	1.674	1.642	0.093	1.65	1.571	1.633
	2 days, 13:45:12	37	1.504	1.592	1.645	0.093	1.742	1.707	1.716	0.093	1.357	1.285	1.468	0.091	1.624	1.587	1.811	0.092	1.706	1.653	1.57	0.092	1.883	1.833	1.851	0.091	1.587	1.772	1.694	0.094	1.599	1.728	1.549	0.093	1.774	1.895	1.748	0.092	1.696	1.822	1.915	0.095	1.668	1.674	1.642	0.093	1.65	1.571	1.632
	2 days, 14:00:12	37	1.502	1.591	1.644	0.092	1.743	1.699	1.692	0.093	1.354	1.282	1.465	0.091	1.622	1.587	1.81	0.092	1.705	1.655	1.566	0.092	1.882	1.831	1.849	0.091	1.587	1.771	1.694	0.094	1.553	1.741	1.551	0.093	1.773	1.891	1.746	0.092	1.696	1.822	1.914	0.095	1.669	1.673	1.641	0.093	1.649	1.571	1.631
	2 days, 14:15:12	37	1.502	1.591	1.643	0.093	1.743	1.708	1.714	0.094	1.352	1.279	1.462	0.092	1.622	1.587	1.81	0.092	1.704	1.655	1.566	0.093	1.881	1.826	1.849	0.091	1.588	1.77	1.693	0.094	1.562	1.731	1.545	0.094	1.771	1.887	1.744	0.092	1.695	1.822	1.913	0.095	1.669	1.673	1.641	0.093	1.649	1.571	1.63
	2 days, 14:30:12	36.9	1.5	1.589	1.642	0.092	1.744	1.703	1.7	0.093	1.35	1.276	1.46	0.091	1.62	1.588	1.809	0.092	1.706	1.654	1.564	0.093	1.879	1.819	1.848	0.091	1.589	1.77	1.692	0.094	1.539	1.741	1.546	0.093	1.77	1.884	1.742	0.092	1.694	1.822	1.912	0.095	1.669	1.673	1.641	0.093	1.649	1.572	1.63
	2 days, 14:45:12	37	1.499	1.588	1.641	0.093	1.744	1.706	1.716	0.093	1.348	1.272	1.457	0.091	1.619	1.588	1.809	0.092	1.704	1.654	1.57	0.092	1.878	1.815	1.847	0.091	1.589	1.769	1.691	0.094	1.544	1.734	1.556	0.093	1.769	1.88	1.739	0.092	1.693	1.821	1.911	0.095	1.669	1.673	1.641	0.093	1.649	1.572	1.629
	2 days, 15:00:12	37	1.498	1.587	1.64	0.093	1.744	1.705	1.695	0.093	1.346	1.269	1.455	0.091	1.618	1.587	1.808	0.092	1.703	1.655	1.563	0.092	1.877	1.811	1.845	0.091	1.589	1.769	1.691	0.094	1.557	1.74	1.55	0.093	1.768	1.877	1.738	0.092	1.693	1.821	1.91	0.095	1.669	1.673	1.641	0.093	1.649	1.571	1.628
	2 days, 15:15:12	36.9	1.496	1.586	1.639	0.092	1.743	1.705	1.71	0.093	1.344	1.266	1.452	0.091	1.617	1.588	1.807	0.092	1.702	1.656	1.577	0.092	1.876	1.808	1.843	0.091	1.59	1.768	1.69	0.094	1.576	1.724	1.551	0.093	1.766	1.873	1.735	0.092	1.692	1.821	1.909	0.095	1.669	1.673	1.641	0.093	1.649	1.571	1.627
	2 days, 15:30:12	37	1.495	1.584	1.638	0.092	1.748	1.704	1.694	0.093	1.342	1.263	1.45	0.091	1.615	1.588	1.806	0.092	1.703	1.656	1.569	0.092	1.875	1.803	1.842	0.091	1.59	1.768	1.689	0.094	1.596	1.738	1.552	0.093	1.765	1.869	1.733	0.092	1.691	1.821	1.908	0.095	1.67	1.673	1.64	0.093	1.649	1.572	1.627
	2 days, 15:45:12	37	1.494	1.583	1.637	0.093	1.749	1.701	1.713	0.093	1.34	1.26	1.448	0.091	1.614	1.588	1.806	0.092	1.703	1.656	1.591	0.092	1.873	1.799	1.841	0.091	1.59	1.767	1.689	0.094	1.541	1.706	1.552	0.093	1.764	1.864	1.73	0.092	1.69	1.821	1.907	0.095	1.669	1.673	1.64	0.093	1.648	1.572	1.626
	2 days, 16:00:12	37	1.493	1.582	1.636	0.093	1.749	1.7	1.699	0.094	1.338	1.257	1.446	0.091	1.613	1.588	1.805	0.092	1.703	1.657	1.623	0.093	1.872	1.794	1.841	0.091	1.591	1.767	1.688	0.094	1.546	1.745	1.552	0.094	1.763	1.859	1.728	0.092	1.689	1.821	1.906	0.095	1.67	1.673	1.64	0.093	1.648	1.572	1.625
	2 days, 16:15:12	37	1.492	1.58	1.635	0.092	1.751	1.706	1.71	0.093	1.336	1.253	1.443	0.091	1.612	1.587	1.804	0.092	1.701	1.658	1.671	0.092	1.871	1.791	1.839	0.091	1.591	1.766	1.688	0.094	1.56	1.714	1.552	0.093	1.761	1.856	1.726	0.092	1.689	1.82	1.905	0.095	1.67	1.672	1.639	0.093	1.647	1.573	1.624
	2 days, 16:30:12	37	1.491	1.579	1.634	0.092	1.75	1.701	1.694	0.093	1.334	1.25	1.441	0.091	1.611	1.587	1.803	0.092	1.703	1.656	1.728	0.092	1.87	1.786	1.837	0.091	1.592	1.766	1.687	0.094	1.54	1.731	1.575	0.093	1.76	1.852	1.724	0.092	1.688	1.82	1.905	0.095	1.67	1.672	1.64	0.093	1.647	1.573	1.624
	2 days, 16:45:12	37	1.49	1.577	1.633	0.093	1.748	1.704	1.706	0.093	1.332	1.248	1.439	0.091	1.61	1.587	1.802	0.092	1.701	1.657	1.818	0.092	1.869	1.779	1.836	0.091	1.593	1.765	1.686	0.094	1.556	1.698	1.556	0.094	1.759	1.849	1.721	0.092	1.687	1.82	1.904	0.095	1.67	1.672	1.639	0.093	1.647	1.573	1.623
	2 days, 17:00:12	37	1.489	1.577	1.632	0.093	1.748	1.702	1.694	0.093	1.33	1.244	1.436	0.091	1.608	1.588	1.802	0.092	1.701	1.656	2	0.093	1.868	1.773	1.835	0.091	1.593	1.764	1.686	0.094	1.631	1.754	1.557	0.093	1.758	1.846	1.72	0.092	1.686	1.82	1.903	0.095	1.67	1.672	1.639	0.093	1.646	1.573	1.622
	2 days, 17:15:12	37	1.489	1.575	1.631	0.092	1.748	1.707	1.71	0.093	1.328	1.241	1.434	0.091	1.607	1.587	1.8	0.092	1.702	1.66	2.102	0.092	1.867	1.765	1.833	0.091	1.593	1.764	1.685	0.094	1.544	1.729	1.56	0.093	1.757	1.843	1.717	0.092	1.684	1.819	1.902	0.095	1.67	1.672	1.639	0.093	1.646	1.574	1.621
	2 days, 17:30:12	37	1.488	1.575	1.63	0.092	1.748	1.702	1.69	0.093	1.327	1.238	1.431	0.091	1.606	1.587	1.799	0.092	1.704	1.661	2.251	0.092	1.865	1.76	1.831	0.091	1.593	1.763	1.684	0.094	1.539	1.759	1.557	0.093	1.756	1.839	1.715	0.092	1.684	1.819	1.901	0.095	1.67	1.671	1.639	0.093	1.646	1.574	1.621
	2 days, 17:45:12	37	1.487	1.572	1.629	0.093	1.749	1.706	1.712	0.094	1.325	1.235	1.429	0.091	1.605	1.588	1.798	0.092	1.706	1.668	2.329	0.093	1.864	1.756	1.83	0.091	1.594	1.763	1.683	0.094	1.547	1.741	1.559	0.094	1.755	1.836	1.713	0.092	1.683	1.819	1.9	0.095	1.671	1.671	1.639	0.093	1.646	1.574	1.62
	2 days, 18:00:12	37	1.485	1.572	1.628	0.092	1.746	1.702	1.694	0.093	1.323	1.232	1.427	0.091	1.603	1.588	1.798	0.092	1.704	1.674	2.355	0.092	1.863	1.754	1.829	0.091	1.593	1.762	1.682	0.094	1.592	1.771	1.564	0.093	1.754	1.833	1.711	0.092	1.683	1.819	1.899	0.095	1.67	1.671	1.639	0.093	1.645	1.575	1.62
	2 days, 18:15:12	37	1.484	1.57	1.627	0.092	1.75	1.712	1.71	0.093	1.321	1.23	1.425	0.091	1.602	1.588	1.796	0.092	1.704	1.69	2.425	0.092	1.862	1.751	1.827	0.091	1.594	1.761	1.682	0.094	1.554	1.738	1.547	0.093	1.753	1.83	1.709	0.092	1.681	1.819	1.898	0.095	1.67	1.671	1.638	0.093	1.645	1.575	1.619
	2 days, 18:30:12	37	1.483	1.569	1.626	0.092	1.748	1.703	1.691	0.093	1.319	1.227	1.422	0.091	1.601	1.588	1.795	0.092	1.707	1.715	2.55	0.092	1.861	1.748	1.825	0.091	1.594	1.761	1.681	0.094	1.606	1.764	1.547	0.093	1.752	1.826	1.707	0.092	1.681	1.818	1.897	0.095	1.67	1.671	1.638	0.093	1.644	1.575	1.618
	2 days, 18:45:12	37	1.482	1.568	1.625	0.093	1.748	1.711	1.707	0.093	1.317	1.224	1.42	0.091	1.6	1.588	1.794	0.092	1.705	1.747	2.505	0.092	1.859	1.745	1.823	0.091	1.594	1.76	1.681	0.094	1.568	1.748	1.553	0.093	1.751	1.823	1.704	0.092	1.68	1.818	1.896	0.095	1.67	1.671	1.638	0.093	1.644	1.574	1.617
	2 days, 19:00:12	37	1.481	1.567	1.623	0.092	1.75	1.704	1.688	0.093	1.316	1.221	1.417	0.091	1.599	1.588	1.794	0.092	1.707	1.792	2.533	0.092	1.858	1.74	1.821	0.091	1.595	1.76	1.679	0.094	1.612	1.766	1.567	0.093	1.751	1.819	1.702	0.092	1.679	1.818	1.895	0.095	1.67	1.67	1.638	0.093	1.644	1.575	1.617
	2 days, 19:15:12	37	1.48	1.566	1.622	0.092	1.75	1.714	1.704	0.093	1.314	1.218	1.415	0.091	1.597	1.588	1.792	0.092	1.708	1.847	2.571	0.092	1.856	1.735	1.82	0.091	1.595	1.759	1.679	0.094	1.64	1.754	1.605	0.093	1.75	1.815	1.7	0.092	1.679	1.817	1.894	0.095	1.67	1.671	1.637	0.093	1.643	1.575	1.616
	2 days, 19:30:12	37	1.479	1.564	1.621	0.092	1.748	1.702	1.687	0.093	1.313	1.215	1.413	0.091	1.596	1.589	1.792	0.092	1.709	1.93	2.577	0.092	1.855	1.728	1.817	0.091	1.595	1.758	1.678	0.094	1.57	1.776	1.563	0.093	1.749	1.813	1.698	0.092	1.678	1.817	1.893	0.095	1.67	1.671	1.637	0.093	1.643	1.575	1.615
	2 days, 19:45:12	37	1.478	1.563	1.62	0.093	1.746	1.71	1.706	0.093	1.312	1.212	1.411	0.091	1.595	1.588	1.791	0.092	1.707	1.985	2.534	0.092	1.853	1.723	1.816	0.091	1.596	1.758	1.678	0.094	1.568	1.754	1.55	0.093	1.748	1.81	1.696	0.092	1.677	1.817	1.892	0.095	1.67	1.67	1.637	0.093	1.643	1.575	1.615
	2 days, 20:00:12	37	1.477	1.561	1.619	0.092	1.743	1.706	1.686	0.093	1.31	1.21	1.409	0.091	1.593	1.589	1.79	0.092	1.71	2.093	2.63	0.092	1.851	1.72	1.815	0.091	1.596	1.757	1.677	0.094	1.586	1.776	1.549	0.093	1.746	1.806	1.694	0.092	1.676	1.817	1.891	0.095	1.67	1.67	1.636	0.093	1.642	1.576	1.614
	2 days, 20:15:12	37	1.476	1.56	1.618	0.092	1.738	1.71	1.704	0.093	1.309	1.207	1.406	0.091	1.592	1.588	1.789	0.092	1.708	2.19	2.61	0.092	1.846	1.719	1.812	0.091	1.597	1.756	1.676	0.094	1.589	1.746	1.561	0.093	1.746	1.802	1.692	0.092	1.675	1.816	1.89	0.095	1.67	1.67	1.636	0.093	1.642	1.575	1.613
	2 days, 20:30:12	37	1.475	1.559	1.617	0.093	1.743	1.706	1.685	0.093	1.307	1.204	1.404	0.091	1.591	1.588	1.788	0.092	1.709	2.3	2.595	0.092	1.845	1.719	1.811	0.091	1.597	1.756	1.676	0.094	1.602	1.754	1.554	0.093	1.745	1.799	1.69	0.092	1.674	1.816	1.889	0.095	1.67	1.669	1.636	0.093	1.642	1.577	1.613
	2 days, 20:45:12	37	1.475	1.558	1.616	0.093	1.745	1.705	1.703	0.093	1.306	1.201	1.402	0.091	1.589	1.588	1.787	0.092	1.71	2.401	2.627	0.093	1.843	1.717	1.809	0.091	1.597	1.755	1.675	0.094	1.616	1.762	1.561	0.093	1.744	1.796	1.688	0.092	1.674	1.816	1.887	0.095	1.67	1.669	1.636	0.093	1.641	1.576	1.612
	2 days, 21:00:12	37	1.474	1.557	1.615	0.092	1.741	1.705	1.683	0.093	1.305	1.199	1.4	0.091	1.588	1.588	1.786	0.092	1.712	2.507	2.588	0.092	1.842	1.715	1.808	0.091	1.598	1.754	1.674	0.094	1.617	1.757	1.62	0.094	1.742	1.793	1.686	0.092	1.673	1.816	1.887	0.095	1.67	1.669	1.635	0.093	1.641	1.576	1.611
	2 days, 21:15:12	37	1.473	1.556	1.614	0.093	1.742	1.706	1.699	0.093	1.303	1.196	1.398	0.091	1.587	1.588	1.786	0.092	1.713	2.564	2.52	0.092	1.841	1.712	1.806	0.091	1.598	1.754	1.673	0.094	1.601	1.753	1.557	0.094	1.742	1.791	1.684	0.092	1.671	1.815	1.886	0.095	1.67	1.669	1.635	0.093	1.641	1.577	1.611
	2 days, 21:30:12	37	1.471	1.555	1.613	0.092	1.746	1.706	1.68	0.093	1.301	1.194	1.396	0.091	1.586	1.588	1.784	0.092	1.712	2.661	2.467	0.092	1.841	1.71	1.803	0.091	1.598	1.753	1.673	0.094	1.636	1.759	1.551	0.093	1.74	1.788	1.681	0.092	1.671	1.815	1.885	0.095	1.671	1.669	1.634	0.093	1.64	1.577	1.61
	00:00:00
	00:00:00
	00:00:00
	00:00:00
	00:00:00
	00:00:00
	00:00:00
	00:00:00
	00:00:00
	00:00:00
Results
		1	2	3	4	5	6	7	8	9	10	11	12
	A	3.487	3.483	3.431	-0.01	4.061	3.964	3.097	0.011	3.009	8.045	3.133	-0.005	Max V [600]
		1	1	1	0.907	0.999	0.965	1	0.639	1	0.997	1	0.889	R-Squared [600]
		07:00:12	07:15:12	07:00:12	00:30:12	18:45:12	18:45:12	07:15:12	00:30:12	1 day, 1:45:12	1 day, 4:00:12	22:45:12	1 day, 19:45:12	t at Max V [600]
		04:41:56	04:48:30	04:42:06	?????	14:03:38	14:10:59	04:44:43	?????	19:46:33	1 day, 2:09:33	17:02:34	1 day, 18:41:27	Lagtime [600]
	B	3.529	3.325	3.43	-0.019	-3.304	6.932	8.867	-0.009	4.299	4.121	4.225	-0.007	Max V [600]
		1	1	1	0.694	0.989	1	0.991	0.86	1	1	0.989	0.781	R-Squared [600]
		07:00:12	07:15:12	07:00:12	00:30:12	22:00:12	2 days, 20:30:12	2 days, 17:00:12	00:30:12	21:30:12	21:45:12	21:30:12	00:30:12	t at Max V [600]
		04:29:42	04:34:17	04:25:34	?????	1 day, 5:41:06	2 days, 15:16:58	2 days, 14:12:02	?????	16:22:28	16:31:19	17:59:46	?????	Lagtime [600]
	C	3.411	3.086	3.429	-8.721	3.315	3.253	3.625	-0.01	3.971	3.493	4.216	0.005	Max V [600]
		1	1	1	0.749	1	1	1	0.987	1	1	0.918	0.942	R-Squared [600]
		07:00:12	07:00:12	07:00:12	2 days, 6:45:12	06:45:12	06:45:12	06:30:12	00:30:12	18:45:12	1 day, 0:00:12	18:15:12	2 days, 13:00:12	t at Max V [600]
		04:29:58	04:25:48	04:28:37	2 days, 6:46:43	04:26:13	04:26:35	04:23:07	?????	12:53:15	17:23:05	14:49:46	2 days, 14:55:55	Lagtime [600]
	D	3.546	3.505	3.259	-0.005	3.352	3.151	3.023	-0.006	3.216	3.219	3.269	-0.013	Max V [600]
		1	1	1	0.942	1	1	1	0.675	1	1	1	0.97	R-Squared [600]
		07:15:12	07:15:12	07:00:12	2 days, 0:15:12	07:15:12	07:00:12	07:30:12	1 day, 2:00:12	07:30:12	07:30:12	07:00:12	00:30:12	t at Max V [600]
		04:41:36	04:50:12	04:43:40	1 day, 22:19:29	04:48:16	04:39:17	04:35:09	1 day, 1:10:12	04:44:05	04:41:46	04:40:25	00:01:47	Lagtime [600]
	E	2.927	3.454	3.472	-0.165	-0.007	-0.007	0.005	0.005	-0.006	0.005	-0.005	-0.009	Max V [600]
		1	0.994	1	0.492	0.758	0.926	0.942	0.696	0.88	0.817	0.942	0.845	R-Squared [600]
		1 day, 2:45:12	1 day, 5:00:12	23:15:12	01:15:12	00:30:12	00:30:12	00:30:12	2 days, 1:30:12	00:30:12	1 day, 14:45:12	03:15:12	00:30:12	t at Max V [600]
		19:27:23	21:40:44	16:55:36	01:30:01	?????	?????	?????	2 days, 1:37:42	?????	1 day, 15:28:03	02:23:46	?????	Lagtime [600]
	F	6.345	3.347	3.988	-0.006	-0.006	0.005	-0.01	0.005	-0.005	-0.005	-0.004	-0.005	Max V [600]
		0.979	1	1	0.92	0.88	0.696	0.893	0.696	0.696	0.721	0.9	0.8	R-Squared [600]
		1 day, 2:30:12	1 day, 0:30:12	20:00:12	11:15:12	00:30:12	18:00:12	00:30:12	22:15:12	03:15:12	1 day, 2:00:12	1 day, 19:45:12	03:15:12	t at Max V [600]
		23:36:36	17:35:00	14:47:43	10:05:12	?????	19:07:42	?????	23:00:12	03:03:57	1 day, 1:21:38	1 day, 19:20:12	02:37:42	Lagtime [600]
	G	3.007	3.973	3.196	-0.005	-0.005	-0.005	0.005	0.005	-0.005	-0.005	0.005	0.005	Max V [600]
		1	0.998	0.991	0.8	0.817	0.942	0.889	0.727	0.593	0.941	0.696	0.8	R-Squared [600]
		22:00:12	17:15:12	16:00:12	00:30:12	2 days, 6:00:12	10:00:12	2 days, 7:45:12	1 day, 3:00:12	00:30:12	10:00:12	2 days, 1:00:12	20:30:12	t at Max V [600]
		14:05:26	12:24:12	10:19:34	?????	2 days, 6:43:03	08:21:38	2 days, 8:30:12	1 day, 3:33:57	?????	09:18:57	2 days, 1:45:12	21:07:42	Lagtime [600]
	H	3.487	3.596	3.408	-0.01	-0.006	0.007	-0.007	0.005	-0.005	-0.005	0.006	-0.006	Max V [600]
		1	1	1	0.893	0.723	0.417	0.893	0.696	0.8	0.817	0.92	0.75	R-Squared [600]
		07:00:12	07:15:12	07:15:12	00:30:12	00:30:12	00:30:12	00:30:12	2 days, 1:00:12	1 day, 2:00:12	1 day, 15:15:12	04:15:12	00:30:12	t at Max V [600]
		04:27:53	04:48:58	04:37:27	?????	?????	?????	?????	2 days, 1:30:12	1 day, 2:00:12	1 day, 15:15:12	04:28:32	?????	Lagtime [600]
[truncated: 49 more columns]

## Sheet: Analysis
	Time	A1	A2	A3	A4		A5	A6	A7	A8		A9	A10	A11	A12		B1	B2	B3	B4		B5	B6	B7	B8		B9	B10	B11	B12		C1	C2	C3	C4		C5	C6	C7	C8		C9	C10	C11	C12		D1	D2	D3
	00:00:12	0.134	0.136	0.133	0.094	0.0403333	0.136	0.135	0.132	0.096	0.0383333	0.128	0.13	0.126	0.092	0.036	0.131	0.134	0.14	0.094	0.041	0.131	0.127	0.489	0.093	0.156	0.131	0.128	0.127	0.092	0.0366667	0.133	0.132	0.147	0.255	0.0433333	0.13	0.13	0.207	0.095	0.0606667	0.135	0.147	0.13	0.092	0.0453333	0.135	0.134	0.139
	00:15:12	0.134	0.138	0.134	0.094	0.0413333	0.137	0.136	0.133	0.097	0.0383333	0.128	0.131	0.127	0.092	0.0366667	0.131	0.135	0.14	0.093	0.0423333	0.132	0.127	0.535	0.093	0.171667	0.131	0.127	0.127	0.092	0.0363333	0.132	0.132	0.148	0.218	0.0433333	0.13	0.131	0.185	0.094	0.0546667	0.134	0.148	0.13	0.092	0.0453333	0.132	0.124	0.133
	00:30:12	0.135	0.139	0.135	0.094	0.0423333	0.138	0.138	0.134	0.096	0.0406667	0.129	0.132	0.128	0.092	0.0376667	0.133	0.137	0.141	0.093	0.044	0.133	0.127	0.57	0.093	0.183667	0.132	0.128	0.128	0.092	0.0373333	0.132	0.132	0.149	0.19	0.0436667	0.131	0.132	0.18	0.094	0.0536667	0.137	0.152	0.132	0.092	0.0483333	0.131	0.127	0.13
	00:45:12	0.135	0.141	0.138	0.093	0.045	0.139	0.139	0.135	0.096	0.0416667	0.131	0.133	0.129	0.092	0.039	0.133	0.139	0.142	0.093	0.045	0.135	0.129	0.584	0.093	0.189667	0.134	0.13	0.13	0.092	0.0393333	0.132	0.133	0.152	0.174	0.045	0.132	0.134	0.181	0.094	0.055	0.139	0.153	0.132	0.092	0.0493333	0.13	0.127	0.13
	01:00:12	0.135	0.141	0.138	0.093	0.045	0.14	0.141	0.137	0.097	0.0423333	0.132	0.135	0.13	0.092	0.0403333	0.134	0.14	0.143	0.093	0.046	0.137	0.13	0.591	0.093	0.193	0.135	0.132	0.131	0.092	0.0406667	0.135	0.134	0.154	0.166	0.047	0.134	0.136	0.182	0.094	0.0566667	0.14	0.155	0.132	0.092	0.0503333	0.133	0.126	0.131
	01:15:12	0.137	0.142	0.14	0.093	0.0466667	0.141	0.141	0.138	0.097	0.043	0.134	0.134	0.131	0.092	0.041	0.137	0.141	0.145	0.093	0.048	0.139	0.132	0.142	0.093	0.0446667	0.136	0.133	0.132	0.092	0.0416667	0.137	0.137	0.156	0.162	0.0493333	0.136	0.138	0.181	0.094	0.0576667	0.141	0.157	0.134	0.092	0.052	0.133	0.128	0.132
	01:30:12	0.139	0.144	0.142	0.093	0.0486667	0.142	0.143	0.14	0.097	0.0446667	0.135	0.135	0.131	0.092	0.0416667	0.139	0.143	0.148	0.093	0.0503333	0.141	0.133	0.144	0.093	0.0463333	0.137	0.134	0.133	0.092	0.0426667	0.14	0.139	0.157	0.159	0.0513333	0.138	0.139	0.183	0.094	0.0593333	0.142	0.159	0.136	0.092	0.0536667	0.136	0.131	0.135
	01:45:12	0.141	0.145	0.145	0.093	0.0506667	0.144	0.145	0.141	0.097	0.0463333	0.136	0.135	0.132	0.093	0.0413333	0.141	0.146	0.151	0.093	0.053	0.143	0.136	0.147	0.093	0.049	0.139	0.135	0.134	0.092	0.044	0.143	0.14	0.16	0.158	0.0536667	0.141	0.142	0.187	0.094	0.0626667	0.145	0.161	0.138	0.092	0.056	0.138	0.134	0.137
	02:00:12	0.145	0.148	0.147	0.093	0.0536667	0.146	0.147	0.144	0.097	0.0486667	0.137	0.136	0.134	0.092	0.0436667	0.145	0.149	0.154	0.093	0.0563333	0.146	0.138	0.15	0.093	0.0516667	0.141	0.137	0.136	0.092	0.046	0.146	0.144	0.163	0.156	0.057	0.144	0.145	0.191	0.094	0.066	0.147	0.163	0.14	0.092	0.058	0.141	0.136	0.14
	02:15:12	0.148	0.152	0.151	0.093	0.0573333	0.149	0.151	0.147	0.097	0.052	0.137	0.137	0.135	0.092	0.0443333	0.148	0.152	0.158	0.093	0.0596667	0.149	0.142	0.155	0.093	0.0556667	0.143	0.139	0.138	0.092	0.048	0.15	0.148	0.167	0.157	0.061	0.147	0.149	0.196	0.094	0.07	0.15	0.167	0.143	0.092	0.0613333	0.145	0.14	0.143
	02:30:12	0.152	0.155	0.155	0.093	0.061	0.153	0.154	0.15	0.097	0.0553333	0.138	0.139	0.136	0.092	0.0456667	0.153	0.157	0.164	0.093	0.065	0.154	0.146	0.16	0.093	0.0603333	0.146	0.142	0.141	0.092	0.051	0.155	0.152	0.173	0.156	0.066	0.152	0.153	0.202	0.094	0.075	0.154	0.171	0.147	0.092	0.0653333	0.149	0.144	0.147
	02:45:12	0.158	0.16	0.16	0.093	0.0663333	0.157	0.159	0.155	0.097	0.06	0.141	0.141	0.138	0.093	0.047	0.16	0.164	0.171	0.093	0.072	0.16	0.15	0.166	0.093	0.0656667	0.149	0.145	0.145	0.092	0.0543333	0.161	0.159	0.179	0.157	0.0723333	0.158	0.159	0.21	0.094	0.0816667	0.16	0.177	0.151	0.092	0.0706667	0.155	0.149	0.153
	03:00:12	0.164	0.166	0.166	0.093	0.0723333	0.162	0.165	0.161	0.097	0.0656667	0.143	0.142	0.14	0.092	0.0496667	0.167	0.171	0.179	0.093	0.0793333	0.167	0.157	0.173	0.093	0.0726667	0.153	0.148	0.148	0.092	0.0576667	0.168	0.166	0.188	0.155	0.08	0.165	0.166	0.219	0.094	0.0893333	0.165	0.182	0.157	0.092	0.076	0.162	0.156	0.159
	03:15:12	0.172	0.173	0.174	0.093	0.08	0.168	0.171	0.167	0.097	0.0716667	0.144	0.144	0.142	0.093	0.0503333	0.176	0.18	0.188	0.093	0.0883333	0.176	0.164	0.182	0.093	0.081	0.158	0.153	0.153	0.092	0.0626667	0.177	0.174	0.197	0.156	0.0886667	0.174	0.174	0.231	0.094	0.099	0.173	0.19	0.163	0.092	0.0833333	0.17	0.163	0.167
	03:30:12	0.182	0.182	0.183	0.093	0.0893333	0.176	0.179	0.175	0.097	0.0796667	0.147	0.147	0.144	0.092	0.054	0.188	0.19	0.2	0.093	0.0996667	0.186	0.172	0.193	0.093	0.0906667	0.163	0.158	0.158	0.092	0.0676667	0.188	0.185	0.209	0.155	0.1	0.184	0.185	0.244	0.094	0.110333	0.181	0.199	0.171	0.092	0.0916667	0.18	0.172	0.176
	03:45:12	0.193	0.193	0.194	0.093	0.100333	0.184	0.189	0.184	0.096	0.0896667	0.148	0.149	0.146	0.092	0.0556667	0.201	0.203	0.214	0.093	0.113	0.198	0.182	0.206	0.093	0.102333	0.17	0.164	0.164	0.092	0.074	0.201	0.198	0.223	0.156	0.113333	0.197	0.197	0.261	0.094	0.124333	0.19	0.209	0.179	0.092	0.100667	0.192	0.183	0.187
	04:00:12	0.207	0.205	0.208	0.093	0.113667	0.195	0.2	0.196	0.096	0.101	0.151	0.152	0.149	0.092	0.0586667	0.217	0.217	0.23	0.093	0.128333	0.213	0.193	0.221	0.093	0.116	0.177	0.172	0.171	0.092	0.0813333	0.216	0.212	0.239	0.156	0.128333	0.211	0.211	0.28	0.094	0.14	0.201	0.221	0.189	0.092	0.111667	0.206	0.196	0.2
	04:15:12	0.222	0.22	0.224	0.093	0.129	0.208	0.214	0.209	0.096	0.114333	0.155	0.156	0.153	0.093	0.0616667	0.236	0.233	0.249	0.093	0.146333	0.23	0.207	0.238	0.093	0.132	0.185	0.179	0.18	0.092	0.0893333	0.234	0.229	0.257	0.155	0.146	0.228	0.228	0.302	0.094	0.158667	0.213	0.234	0.201	0.092	0.124	0.223	0.211	0.215
	04:30:12	0.24	0.237	0.242	0.093	0.146667	0.223	0.23	0.225	0.096	0.13	0.159	0.16	0.157	0.093	0.0656667	0.258	0.253	0.271	0.093	0.167667	0.25	0.224	0.259	0.093	0.151333	0.195	0.189	0.189	0.092	0.099	0.254	0.248	0.279	0.156	0.166333	0.248	0.247	0.327	0.094	0.18	0.227	0.249	0.215	0.092	0.138333	0.243	0.229	0.233
	04:45:12	0.262	0.257	0.264	0.093	0.168	0.241	0.248	0.244	0.096	0.148333	0.163	0.164	0.162	0.093	0.07	0.282	0.275	0.296	0.093	0.191333	0.273	0.243	0.283	0.093	0.173333	0.206	0.2	0.2	0.092	0.11	0.278	0.27	0.303	0.156	0.189667	0.272	0.269	0.355	0.094	0.204667	0.243	0.266	0.23	0.092	0.154333	0.265	0.249	0.254
	05:00:12	0.287	0.281	0.287	0.093	0.192	0.261	0.269	0.265	0.096	0.169	0.169	0.17	0.167	0.092	0.0766667	0.311	0.3	0.325	0.093	0.219	0.299	0.265	0.31	0.093	0.198333	0.218	0.211	0.212	0.092	0.121667	0.305	0.297	0.331	0.155	0.217	0.299	0.295	0.388	0.094	0.233333	0.261	0.285	0.247	0.092	0.172333	0.291	0.273	0.277
	05:15:12	0.316	0.308	0.314	0.093	0.219667	0.283	0.292	0.289	0.096	0.192	0.174	0.175	0.172	0.092	0.0816667	0.343	0.328	0.357	0.093	0.249667	0.328	0.29	0.341	0.093	0.226667	0.231	0.225	0.225	0.092	0.135	0.337	0.325	0.363	0.155	0.247667	0.329	0.325	0.425	0.094	0.265667	0.28	0.306	0.266	0.092	0.192	0.32	0.299	0.303
	05:30:12	0.348	0.339	0.345	0.093	0.251	0.31	0.32	0.316	0.096	0.219333	0.18	0.182	0.178	0.092	0.088	0.379	0.359	0.392	0.093	0.283667	0.361	0.32	0.376	0.093	0.259333	0.247	0.239	0.239	0.092	0.149667	0.373	0.357	0.398	0.156	0.282	0.364	0.359	0.466	0.094	0.302333	0.303	0.329	0.287	0.092	0.214333	0.354	0.329	0.333
	05:45:12	0.383	0.372	0.379	0.093	0.285	0.34	0.35	0.348	0.096	0.25	0.188	0.189	0.185	0.092	0.0953333	0.419	0.395	0.431	0.093	0.322	0.398	0.353	0.415	0.093	0.295667	0.264	0.256	0.255	0.092	0.166333	0.411	0.392	0.436	0.156	0.319	0.402	0.396	0.511	0.094	0.342333	0.328	0.354	0.309	0.092	0.238333	0.391	0.364	0.367
	06:00:12	0.423	0.409	0.416	0.093	0.323	0.373	0.386	0.383	0.096	0.284667	0.195	0.197	0.193	0.092	0.103	0.462	0.434	0.475	0.093	0.364	0.439	0.39	0.456	0.093	0.335333	0.282	0.275	0.273	0.092	0.184667	0.452	0.431	0.476	0.157	0.359	0.445	0.438	0.56	0.094	0.387	0.355	0.382	0.334	0.092	0.265	0.432	0.4	0.403
	06:15:12	0.465	0.45	0.459	0.093	0.365	0.409	0.424	0.421	0.096	0.322	0.204	0.205	0.201	0.092	0.111333	0.508	0.476	0.52	0.092	0.409333	0.483	0.43	0.503	0.093	0.379	0.303	0.294	0.292	0.092	0.204333	0.497	0.472	0.519	0.156	0.402	0.491	0.483	0.613	0.094	0.435	0.385	0.412	0.36	0.092	0.293667	0.476	0.442	0.444
	06:30:12	0.513	0.495	0.505	0.093	0.411333	0.45	0.467	0.462	0.096	0.363667	0.213	0.215	0.211	0.092	0.121	0.556	0.52	0.568	0.093	0.455	0.528	0.475	0.55	0.093	0.424667	0.324	0.315	0.313	0.092	0.225333	0.544	0.516	0.566	0.157	0.448	0.54	0.532	0.665	0.094	0.485	0.417	0.445	0.39	0.092	0.325333	0.524	0.487	0.487
	06:45:12	0.563	0.543	0.554	0.093	0.460333	0.494	0.509	0.505	0.096	0.406667	0.222	0.224	0.221	0.092	0.130333	0.609	0.569	0.618	0.093	0.505667	0.574	0.519	0.594	0.093	0.469333	0.347	0.338	0.336	0.092	0.248333	0.594	0.561	0.615	0.157	0.496	0.592	0.582	0.723	0.094	0.538333	0.451	0.477	0.421	0.092	0.357667	0.573	0.537	0.534
	07:00:12	0.616	0.594	0.606	0.093	0.512333	0.539	0.554	0.551	0.096	0.452	0.233	0.234	0.233	0.092	0.141333	0.662	0.619	0.668	0.093	0.556667	0.617	0.567	0.639	0.093	0.514667	0.372	0.363	0.361	0.092	0.273333	0.646	0.608	0.666	0.157	0.546	0.64	0.629	0.777	0.094	0.588	0.486	0.511	0.454	0.092	0.391667	0.627	0.59	0.584
	07:15:12	0.668	0.646	0.657	0.093	0.564	0.587	0.601	0.598	0.096	0.499333	0.244	0.245	0.245	0.092	0.152667	0.715	0.669	0.721	0.093	0.608667	0.661	0.613	0.684	0.093	0.559667	0.398	0.388	0.386	0.092	0.298667	0.698	0.656	0.719	0.157	0.597	0.69	0.679	0.823	0.094	0.636667	0.523	0.546	0.487	0.092	0.426667	0.679	0.643	0.632
	07:30:12	0.722	0.7	0.711	0.093	0.618	0.634	0.646	0.645	0.096	0.545667	0.256	0.256	0.258	0.092	0.164667	0.768	0.718	0.774	0.093	0.660333	0.707	0.659	0.728	0.093	0.605	0.425	0.415	0.413	0.092	0.325667	0.748	0.7	0.771	0.157	0.645667	0.736	0.724	0.87	0.094	0.682667	0.56	0.58	0.522	0.092	0.462	0.734	0.695	0.682
	07:45:12	0.768	0.751	0.596	0.093	0.612	0.681	0.689	0.691	0.096	0.591	0.27	0.269	0.272	0.093	0.177333	0.816	0.768	0.821	0.093	0.708667	0.75	0.703	0.771	0.093	0.648333	0.451	0.444	0.442	0.092	0.353667	0.795	0.744	0.82	0.157	0.692333	0.783	0.772	0.915	0.094	0.729333	0.598	0.617	0.557	0.092	0.498667	0.786	0.747	0.729
	08:00:12	0.812	0.8	0.631	0.093	0.654667	0.726	0.731	0.735	0.096	0.634667	0.283	0.282	0.286	0.092	0.191667	0.864	0.813	0.867	0.093	0.755	0.792	0.745	0.814	0.093	0.690667	0.48	0.473	0.472	0.092	0.383	0.842	0.787	0.869	0.158	0.738667	0.826	0.819	0.959	0.094	0.774	0.635	0.654	0.593	0.092	0.535333	0.834	0.798	0.776
	08:15:12	0.855	0.847	0.669	0.093	0.697333	0.766	0.772	0.776	0.096	0.675333	0.297	0.297	0.301	0.092	0.206333	0.908	0.858	0.911	0.092	0.800333	0.832	0.786	0.854	0.093	0.731	0.508	0.503	0.501	0.092	0.412	0.885	0.828	0.912	0.158	0.781	0.869	0.865	1.002	0.094	0.818	0.671	0.69	0.628	0.092	0.571	0.88	0.844	0.824
	08:30:12	0.894	0.889	0.703	0.093	0.735667	0.804	0.812	0.816	0.096	0.714667	0.312	0.312	0.317	0.092	0.221667	0.951	0.899	0.95	0.092	0.841333	0.87	0.825	0.893	0.093	0.769667	0.534	0.533	0.529	0.092	0.44	0.927	0.869	0.956	0.159	0.823333	0.91	0.907	1.042	0.094	0.859	0.706	0.722	0.601	0.092	0.584333	0.926	0.889	0.87
	08:45:12	0.935	0.932	0.737	0.093	0.775	0.844	0.853	0.856	0.096	0.755	0.327	0.328	0.333	0.092	0.237333	0.991	0.938	0.985	0.093	0.878333	0.908	0.865	0.937	0.093	0.810333	0.563	0.563	0.559	0.092	0.469667	0.97	0.907	0.997	0.158	0.864	0.952	0.949	1.074	0.094	0.897667	0.737	0.754	0.632	0.092	0.615667	0.969	0.931	0.912
	09:00:12	0.973	0.968	0.771	0.092	0.812	0.885	0.889	0.894	0.096	0.793333	0.343	0.343	0.351	0.092	0.253667	1.029	0.974	1.019	0.093	0.914333	0.944	0.902	0.968	0.093	0.845	0.591	0.59	0.587	0.092	0.497333	1.009	0.942	1.035	0.16	0.901333	0.988	0.987	1.111	0.094	0.934667	0.768	0.783	0.66	0.092	0.645	1.011	0.97	0.952
	09:15:12	1.01	1.007	0.758	0.093	0.832	0.92	0.923	0.931	0.096	0.828667	0.36	0.361	0.368	0.092	0.271	1.067	1.009	1.054	0.093	0.950333	0.977	0.939	1	0.093	0.879	0.618	0.619	0.617	0.092	0.526	1.046	0.977	1.071	0.158	0.937333	1.025	1.02	1.146	0.094	0.969667	0.796	0.811	0.685	0.092	0.672	1.05	1.01	0.99
	09:30:12	1.046	1.046	0.797	0.093	0.87	0.954	0.955	0.964	0.096	0.861667	0.376	0.377	0.386	0.092	0.287667	1.102	1.042	1.086	0.092	0.984667	1.007	0.974	1.03	0.093	0.910667	0.645	0.645	0.644	0.092	0.552667	1.083	1.008	1.106	0.158	0.971667	1.058	1.055	1.179	0.094	1.00333	0.822	0.838	0.71	0.092	0.698	1.089	1.048	1.028
	09:45:12	1.081	1.081	0.843	0.092	0.909667	0.986	0.985	0.996	0.096	0.893	0.392	0.392	0.403	0.092	0.303667	1.135	1.074	1.115	0.092	1.016	1.036	1.006	1.06	0.093	0.941	0.669	0.672	0.669	0.092	0.578	1.117	1.039	1.139	0.159	1.00433	1.089	1.085	1.212	0.094	1.03467	0.847	0.86	0.734	0.092	0.721667	1.126	1.081	1.063
	10:00:12	1.113	1.115	0.869	0.093	0.939333	1.014	1.015	1.025	0.096	0.922	0.409	0.41	0.42	0.092	0.321	1.167	1.098	1.143	0.093	1.043	1.063	1.036	1.085	0.093	0.968333	0.693	0.696	0.693	0.092	0.602	1.15	1.07	1.17	0.16	1.036	1.118	1.115	1.241	0.094	1.064	0.869	0.881	0.756	0.092	0.743333	1.161	1.117	1.096
	10:15:12	1.145	1.149	0.901	0.093	0.972	1.041	1.042	1.054	0.096	0.949667	0.426	0.427	0.438	0.092	0.338333	1.194	1.126	1.171	0.093	1.07067	1.087	1.064	1.111	0.093	0.994333	0.716	0.718	0.718	0.092	0.625333	1.181	1.099	1.199	0.16	1.06567	1.146	1.145	1.267	0.094	1.092	0.889	0.901	0.775	0.092	0.763	1.193	1.149	1.129
	10:30:12	1.174	1.18	0.943	0.092	1.007	1.068	1.065	1.078	0.095	0.975333	0.443	0.443	0.456	0.092	0.355333	1.222	1.153	1.196	0.092	1.09833	1.111	1.09	1.134	0.093	1.01867	0.736	0.739	0.739	0.092	0.646	1.211	1.127	1.225	0.16	1.09367	1.172	1.171	1.294	0.094	1.11833	0.907	0.915	0.792	0.092	0.779333	1.223	1.181	1.158
	10:45:12	1.203	1.209	0.982	0.093	1.03833	1.087	1.082	1.096	0.096	0.992333	0.46	0.459	0.474	0.092	0.372333	1.248	1.072	1.221	0.092	1.08833	1.132	1.112	1.155	0.093	1.04	0.756	0.757	0.757	0.092	0.664667	1.241	1.153	1.253	0.159	1.12167	1.196	1.196	1.316	0.094	1.142	0.923	0.929	0.807	0.092	0.794333	1.251	1.21	1.188
	11:00:12	1.231	1.24	1.025	0.092	1.07333	1.097	1.087	1.103	0.095	1.00067	0.477	0.475	0.49	0.092	0.388667	1.272	1.088	1.244	0.092	1.10933	1.15	1.134	1.172	0.093	1.059	0.771	0.773	0.773	0.092	0.680333	1.267	1.179	1.279	0.161	1.14767	1.217	1.217	1.333	0.094	1.16167	0.931	0.934	0.815	0.092	0.801333	1.278	1.239	1.216
	11:15:12	1.259	1.264	1.062	0.093	1.102	1.101	1.087	1.105	0.096	1.00167	0.493	0.49	0.505	0.092	0.404	1.295	1.11	1.266	0.092	1.13167	1.161	1.151	1.182	0.093	1.07167	0.782	0.782	0.787	0.092	0.691667	1.293	1.205	1.304	0.162	1.17333	1.236	1.236	1.342	0.094	1.17733	0.939	0.941	0.823	0.092	0.809	1.303	1.265	1.241
	11:30:12	1.279	1.289	1.103	0.093	1.13067	1.102	1.088	1.105	0.096	1.00233	0.51	0.506	0.52	0.092	0.42	1.316	1.122	1.286	0.092	1.14933	1.169	1.161	1.186	0.093	1.079	0.791	0.791	0.795	0.092	0.700333	1.317	1.228	1.326	0.163	1.19633	1.249	1.248	1.35	0.094	1.18833	0.944	0.947	0.828	0.092	0.814333	1.324	1.288	1.265
	11:45:12	1.303	1.314	1.139	0.093	1.159	1.101	1.086	1.105	0.095	1.00233	0.528	0.519	0.535	0.092	0.435333	1.334	1.139	1.305	0.093	1.16633	1.173	1.168	1.184	0.093	1.082	0.796	0.796	0.802	0.092	0.706	1.336	1.25	1.348	0.164	1.21733	1.257	1.255	1.353	0.094	1.19433	0.949	0.95	0.834	0.092	0.819	1.341	1.309	1.289
	12:00:12	1.322	1.332	1.171	0.092	1.183	1.099	1.084	1.102	0.095	1	0.542	0.532	0.549	0.092	0.449	1.35	1.159	1.32	0.092	1.18433	1.176	1.171	1.184	0.093	1.084	0.802	0.802	0.805	0.091	0.712	1.351	1.269	1.365	0.166	1.23433	1.261	1.259	1.356	0.094	1.198	0.952	0.954	0.838	0.092	0.822667	1.353	1.325	1.309
	12:15:12	1.337	1.349	1.193	0.092	1.201	1.099	1.085	1.102	0.095	1.00033	0.556	0.547	0.561	0.092	0.462667	1.361	1.177	1.333	0.092	1.19833	1.179	1.173	1.183	0.093	1.08533	0.807	0.808	0.81	0.092	0.716333	1.364	1.286	1.38	0.167	1.24933	1.265	1.261	1.358	0.094	1.20067	0.954	0.956	0.842	0.092	0.825333	1.363	1.339	1.323
	12:30:12	1.351	1.363	1.212	0.092	1.21667	1.1	1.087	1.104	0.095	1.002	0.57	0.559	0.574	0.092	0.475667	1.372	1.192	1.409	0.092	1.23233	1.182	1.173	1.182	0.092	1.087	0.81	0.81	0.813	0.092	0.719	1.375	1.298	1.391	0.17	1.26067	1.268	1.263	1.361	0.094	1.20333	0.957	0.958	0.845	0.092	0.828	1.372	1.348	1.335
	12:45:12	1.362	1.376	1.237	0.092	1.233	1.105	1.092	1.108	0.095	1.00667	0.58	0.572	0.585	0.092	0.487	1.382	1.206	1.417	0.092	1.243	1.186	1.175	1.183	0.093	1.08833	0.813	0.814	0.815	0.091	0.723	1.385	1.31	1.403	0.172	1.272	1.271	1.267	1.295	0.094	1.18367	0.96	0.961	0.848	0.092	0.831	1.381	1.359	1.345
	13:00:12	1.373	1.387	1.256	0.092	1.24667	1.111	1.099	1.114	0.095	1.013	0.593	0.582	0.595	0.092	0.498	1.392	1.218	1.427	0.092	1.25367	1.191	1.178	1.186	0.092	1.093	0.819	0.816	0.818	0.092	0.725667	1.394	1.321	1.412	0.174	1.28167	1.277	1.272	1.303	0.094	1.19	0.963	0.963	0.852	0.092	0.834	1.389	1.368	1.355
	13:15:12	1.38	1.397	1.271	0.092	1.25733	1.117	1.104	1.119	0.095	1.01833	0.602	0.591	0.602	0.092	0.506333	1.4	1.229	1.434	0.092	1.26233	1.196	1.183	1.19	0.092	1.09767	0.821	0.819	0.822	0.092	0.728667	1.402	1.33	1.42	0.176	1.29	1.281	1.277	1.309	0.094	1.195	0.965	0.966	0.856	0.092	0.837	1.397	1.377	1.363
	13:30:12	1.386	1.404	1.283	0.092	1.26567	1.123	1.11	1.126	0.095	1.02467	0.61	0.599	0.608	0.092	0.513667	1.406	1.238	1.441	0.092	1.26967	1.203	1.189	1.195	0.092	1.10367	0.824	0.823	0.824	0.092	0.731667	1.407	1.339	1.428	0.177	1.29733	1.287	1.282	1.313	0.094	1.2	0.968	0.97	0.86	0.092	0.840667	1.402	1.385	1.37
	13:45:12	1.39	1.408	1.289	0.093	1.26933	1.128	1.115	1.132	0.095	1.03	0.617	0.605	0.613	0.092	0.519667	1.412	1.246	1.446	0.092	1.276	1.21	1.194	1.2	0.093	1.10833	0.829	0.826	0.826	0.092	0.735	1.412	1.348	1.434	0.18	1.304	1.294	1.287	1.317	0.094	1.20533	0.973	0.973	0.865	0.092	0.845	1.406	1.39	1.377
	14:00:12	1.393	1.411	1.296	0.093	1.27367	1.132	1.12	1.137	0.095	1.03467	0.623	0.609	0.618	0.092	0.524667	1.417	1.251	1.451	0.092	1.281	1.216	1.2	1.205	0.093	1.114	0.832	0.831	0.83	0.092	0.739	1.415	1.355	1.439	0.182	1.309	1.298	1.292	1.321	0.094	1.20967	0.977	0.976	0.868	0.092	0.848333	1.409	1.395	1.382
	14:15:12	1.395	1.413	1.302	0.093	1.277	1.136	1.123	1.142	0.095	1.03867	0.627	0.614	0.621	0.092	0.528667	1.421	1.256	1.454	0.092	1.285	1.222	1.206	1.211	0.093	1.12	0.834	0.834	0.836	0.092	0.742667	1.418	1.36	1.442	0.183	1.31267	1.302	1.296	1.324	0.094	1.21333	0.981	0.98	0.873	0.092	0.852667	1.412	1.399	1.386
	14:30:12	1.396	1.412	1.306	0.093	1.27833	1.139	1.126	1.145	0.095	1.04167	0.631	0.617	0.625	0.092	0.532333	1.424	1.261	1.457	0.092	1.28867	1.227	1.212	1.214	0.093	1.12467	0.838	0.84	0.839	0.092	0.747	1.42	1.364	1.444	0.184	1.31533	1.305	1.3	1.326	0.094	1.21633	0.984	0.983	0.877	0.092	0.856	1.414	1.402	1.389
	14:45:12	1.397	1.404	1.31	0.092	1.27833	1.142	1.128	1.148	0.095	1.04433	0.635	0.621	0.628	0.092	0.536	1.427	1.264	1.461	0.092	1.292	1.232	1.216	1.218	0.093	1.129	0.842	0.843	0.842	0.092	0.750333	1.423	1.367	1.445	0.186	1.31767	1.308	1.302	1.329	0.094	1.219	0.987	0.986	0.881	0.092	0.859333	1.416	1.404	1.392
	15:00:12	1.398	1.398	1.313	0.093	1.27667	1.143	1.13	1.15	0.095	1.046	0.639	0.624	0.632	0.092	0.539667	1.429	1.267	1.465	0.092	1.295	1.237	1.22	1.221	0.093	1.133	0.847	0.847	0.847	0.092	0.755	1.424	1.37	1.446	0.188	1.31933	1.31	1.303	1.33	0.094	1.22033	0.99	0.989	0.884	0.092	0.862333	1.417	1.406	1.395
	15:15:12	1.398	1.422	1.314	0.093	1.285	1.145	1.131	1.151	0.095	1.04733	0.642	0.627	0.635	0.092	0.542667	1.43	1.27	1.468	0.092	1.29733	1.24	1.223	1.223	0.093	1.13567	0.849	0.851	0.85	0.092	0.758	1.425	1.372	1.443	0.19	1.31933	1.312	1.305	1.333	0.094	1.22267	0.994	0.992	0.887	0.092	0.865667	1.418	1.408	1.396
	15:30:12	1.398	1.466	1.311	0.092	1.29967	1.147	1.132	1.152	0.095	1.04867	0.646	0.63	0.638	0.092	0.546	1.431	1.272	1.469	0.092	1.29867	1.244	1.226	1.225	0.093	1.13867	0.853	0.854	0.853	0.092	0.761333	1.426	1.373	1.438	0.19	1.31833	1.314	1.306	1.334	0.094	1.224	0.992	0.994	0.889	0.092	0.866333	1.42	1.409	1.396
	15:45:12	1.398	1.477	1.306	0.093	1.30067	1.147	1.132	1.153	0.095	1.049	0.649	0.633	0.641	0.092	0.549	1.431	1.274	1.47	0.092	1.29967	1.243	1.229	1.226	0.093	1.13967	0.855	0.858	0.857	0.092	0.764667	1.427	1.374	1.441	0.192	1.32	1.315	1.306	1.334	0.094	1.22433	0.979	0.997	0.891	0.092	0.863667	1.42	1.41	1.397
	16:00:12	1.397	1.459	1.314	0.093	1.297	1.149	1.133	1.153	0.095	1.05	0.652	0.636	0.643	0.092	0.551667	1.431	1.276	1.468	0.092	1.29967	1.237	1.231	1.227	0.092	1.13967	0.857	0.859	0.862	0.092	0.767333	1.427	1.375	1.469	0.193	1.32967	1.315	1.302	1.335	0.094	1.22333	1.002	1	0.894	0.092	0.873333	1.421	1.411	1.394
	16:15:12	1.396	1.456	1.348	0.093	1.307	1.116	1.134	1.153	0.095	1.03933	0.655	0.637	0.645	0.092	0.553667	1.43	1.279	1.465	0.092	1.29933	1.265	1.233	1.227	0.093	1.14867	0.861	0.863	0.865	0.092	0.771	1.428	1.376	1.507	0.193	1.343	1.316	1.315	1.337	0.094	1.22867	1.099	1.001	0.895	0.092	0.906333	1.423	1.413	1.385
	16:30:12	1.395	1.455	1.399	0.092	1.32433	1.108	1.134	1.153	0.095	1.03667	0.657	0.64	0.647	0.092	0.556	1.432	1.28	1.459	0.092	1.29833	1.321	1.236	1.228	0.093	1.16867	0.861	0.865	0.866	0.092	0.772	1.429	1.376	1.514	0.195	1.34567	1.312	1.367	1.337	0.094	1.24467	1.172	1.003	0.897	0.092	0.932	1.423	1.413	1.374
	16:45:12	1.394	1.457	1.438	0.092	1.33767	1.117	1.135	1.153	0.095	1.04	0.66	0.643	0.65	0.092	0.559	1.431	1.283	1.46	0.092	1.29933	1.373	1.238	1.227	0.093	1.18633	0.864	0.868	0.869	0.092	0.775	1.43	1.375	1.498	0.196	1.34033	1.301	1.416	1.337	0.094	1.25733	1.177	1.005	0.898	0.092	0.934667	1.424	1.415	1.404
	17:00:12	1.391	1.462	1.44	0.092	1.339	1.129	1.135	1.151	0.095	1.04333	0.662	0.646	0.652	0.092	0.561333	1.42	1.285	1.469	0.092	1.29933	1.391	1.239	1.227	0.092	1.19367	0.867	0.871	0.871	0.092	0.777667	1.431	1.368	1.492	0.197	1.33633	1.29	1.395	1.338	0.094	1.247	1.198	1.006	0.899	0.092	0.942333	1.424	1.415	1.475
	17:15:12	1.385	1.471	1.441	0.093	1.33933	1.13	1.135	1.149	0.095	1.043	0.665	0.648	0.655	0.092	0.564	1.413	1.287	1.485	0.092	1.303	1.406	1.241	1.224	0.093	1.19733	0.867	0.872	0.873	0.092	0.778667	1.431	1.358	1.489	0.197	1.332	1.308	1.396	1.339	0.094	1.25367	1.228	1.007	0.898	0.092	0.952333	1.423	1.415	1.545
	17:30:12	1.377	1.481	1.448	0.092	1.34333	1.123	1.134	1.153	0.094	1.04267	0.668	0.651	0.657	0.092	0.566667	1.438	1.289	1.508	0.092	1.31967	1.429	1.243	1.221	0.092	1.20567	0.863	0.872	0.874	0.091	0.778667	1.431	1.374	1.485	0.201	1.336	1.358	1.406	1.338	0.094	1.27333	1.264	1.01	0.899	0.092	0.965667	1.421	1.415	1.544
	17:45:12	1.381	1.493	1.458	0.093	1.351	1.119	1.132	1.173	0.095	1.04633	0.669	0.654	0.657	0.092	0.568	1.483	1.294	1.536	0.092	1.34567	1.463	1.245	1.21	0.093	1.213	0.858	0.87	0.875	0.092	0.775667	1.432	1.412	1.488	0.201	1.35	1.396	1.421	1.339	0.094	1.29133	1.308	1.012	0.894	0.092	0.979333	1.415	1.415	1.539
	18:00:12	1.409	1.507	1.471	0.092	1.37033	1.129	1.127	1.208	0.095	1.05967	0.672	0.656	0.659	0.092	0.570333	1.498	1.298	1.555	0.092	1.35833	1.503	1.243	1.201	0.093	1.22267	0.865	0.866	0.875	0.092	0.776667	1.433	1.45	1.495	0.204	1.36533	1.413	1.441	1.339	0.094	1.30367	1.358	1.013	0.892	0.092	0.995667	1.404	1.415	1.547
	18:15:12	1.441	1.522	1.484	0.092	1.39033	1.159	1.119	1.242	0.094	1.07933	0.674	0.658	0.656	0.092	0.570667	1.495	1.297	1.561	0.092	1.359	1.545	1.239	1.229	0.093	1.24467	0.928	0.874	0.877	0.092	0.801	1.433	1.458	1.506	0.206	1.37167	1.428	1.464	1.338	0.094	1.316	1.413	1.011	0.99	0.092	1.046	1.418	1.415	1.56
	18:30:12	1.446	1.538	1.498	0.093	1.401	1.214	1.14	1.249	0.095	1.106	0.675	0.66	0.656	0.092	0.571667	1.502	1.292	1.562	0.092	1.36	1.588	1.232	1.3	0.093	1.28033	0.993	0.906	0.877	0.092	0.833333	1.433	1.45	1.517	0.206	1.37267	1.441	1.488	1.338	0.094	1.32833	1.472	1.01	1.093	0.092	1.09967	1.467	1.415	1.574
	18:45:12	1.438	1.555	1.513	0.093	1.409	1.28	1.216	1.253	0.095	1.15467	0.677	0.66	0.683	0.092	0.581333	1.511	1.294	1.566	0.092	1.365	1.624	1.23	1.38	0.093	1.31833	1.013	0.948	0.879	0.092	0.854667	1.434	1.453	1.529	0.206	1.378	1.456	1.514	1.339	0.094	1.34233	1.532	1.011	1.11	0.092	1.12567	1.528	1.415	1.591
	19:00:12	1.436	1.57	1.529	0.092	1.41967	1.345	1.303	1.264	0.094	1.21	0.677	0.662	0.739	0.092	0.600667	1.522	1.312	1.573	0.092	1.377	1.663	1.24	1.433	0.092	1.35333	1.023	0.979	0.88	0.092	0.868667	1.435	1.461	1.543	0.209	1.38567	1.473	1.538	1.338	0.094	1.35567	1.592	1.018	1.133	0.092	1.15567	1.543	1.413	1.611
	19:15:12	1.438	1.586	1.547	0.092	1.43167	1.399	1.334	1.281	0.094	1.244	0.678	0.663	0.787	0.092	0.617333	1.538	1.337	1.585	0.092	1.39467	1.688	1.268	1.464	0.093	1.38033	1.039	1.003	0.879	0.092	0.881667	1.435	1.47	1.558	0.209	1.39367	1.496	1.563	1.339	0.094	1.372	1.651	1.026	1.168	0.092	1.18967	1.53	1.411	1.634
	19:30:12	1.442	1.602	1.563	0.092	1.44367	1.444	1.347	1.303	0.094	1.27067	0.681	0.664	0.803	0.092	0.624	1.554	1.358	1.601	0.092	1.41233	1.71	1.316	1.49	0.092	1.41333	1.06	1.028	0.879	0.092	0.897	1.435	1.481	1.572	0.212	1.402	1.519	1.583	1.338	0.094	1.386	1.703	1.036	1.209	0.092	1.224	1.529	1.407	1.658
	19:45:12	1.447	1.615	1.58	0.093	1.45433	1.483	1.366	1.327	0.094	1.298	0.69	0.666	0.813	0.092	0.631	1.571	1.365	1.618	0.092	1.426	1.73	1.381	1.522	0.093	1.45133	1.089	1.052	0.88	0.092	0.915	1.436	1.496	1.587	0.213	1.41233	1.542	1.605	1.338	0.094	1.401	1.747	1.051	1.256	0.092	1.25933	1.533	1.399	1.683
	20:00:12	1.45	1.628	1.596	0.093	1.465	1.511	1.386	1.354	0.094	1.323	0.704	0.667	0.828	0.092	0.641	1.586	1.361	1.637	0.092	1.436	1.748	1.446	1.558	0.092	1.492	1.124	1.078	0.878	0.092	0.934667	1.436	1.514	1.6	0.213	1.42267	1.565	1.625	1.336	0.094	1.41467	1.783	1.069	1.306	0.092	1.294	1.541	1.389	1.707
	20:15:12	1.455	1.639	1.612	0.093	1.47567	1.533	1.411	1.383	0.094	1.34833	0.725	0.668	0.844	0.092	0.653667	1.6	1.363	1.652	0.092	1.44633	1.762	1.499	1.596	0.093	1.526	1.167	1.108	0.876	0.092	0.958333	1.437	1.534	1.612	0.215	1.43367	1.583	1.639	1.334	0.094	1.42467	1.811	1.093	1.36	0.092	1.32933	1.551	1.377	1.728
	20:30:12	1.459	1.649	1.626	0.093	1.485	1.548	1.441	1.413	0.094	1.37333	0.751	0.67	0.865	0.092	0.67	1.612	1.365	1.671	0.092	1.45733	1.766	1.536	1.632	0.093	1.55167	1.215	1.146	0.873	0.092	0.986	1.437	1.555	1.625	0.215	1.445	1.596	1.641	1.33	0.094	1.42833	1.835	1.122	1.416	0.092	1.36567	1.561	1.373	1.746
	20:45:12	1.463	1.657	1.639	0.092	1.49433	1.552	1.47	1.446	0.094	1.39533	0.78	0.671	0.891	0.092	0.688667	1.622	1.37	1.688	0.092	1.468	1.767	1.572	1.66	0.092	1.57433	1.268	1.192	0.874	0.092	1.01933	1.437	1.577	1.635	0.218	1.45567	1.605	1.634	1.323	0.094	1.42667	1.86	1.152	1.473	0.092	1.403	1.571	1.385	1.763
	21:00:12	1.469	1.665	1.647	0.093	1.50067	1.552	1.495	1.478	0.094	1.41433	0.805	0.671	0.92	0.092	0.706667	1.631	1.376	1.704	0.092	1.47833	1.766	1.613	1.677	0.093	1.59233	1.324	1.245	0.895	0.092	1.06267	1.438	1.598	1.644	0.22	1.466	1.609	1.621	1.313	0.094	1.42033	1.887	1.179	1.53	0.092	1.44	1.582	1.411	1.78
	21:15:12	1.475	1.671	1.656	0.092	1.50867	1.535	1.514	1.504	0.094	1.42367	0.819	0.672	0.951	0.092	0.722	1.639	1.383	1.719	0.092	1.48833	1.764	1.654	1.683	0.093	1.60733	1.388	1.3	0.942	0.092	1.118	1.437	1.617	1.652	0.22	1.47467	1.606	1.608	1.311	0.094	1.41433	1.915	1.192	1.578	0.092	1.46967	1.594	1.44	1.794
	21:30:12	1.481	1.675	1.662	0.092	1.514	1.523	1.525	1.523	0.094	1.42967	0.824	0.672	0.985	0.092	0.735	1.646	1.389	1.733	0.092	1.49733	1.745	1.688	1.678	0.093	1.61067	1.456	1.357	1.012	0.091	1.184	1.438	1.634	1.659	0.221	1.483	1.601	1.593	1.338	0.094	1.41667	1.929	1.202	1.627	0.092	1.494	1.605	1.466	1.806
	21:45:12	1.486	1.68	1.666	0.092	1.51867	1.514	1.53	1.536	0.094	1.43267	0.829	0.672	1.021	0.092	0.748667	1.652	1.395	1.745	0.092	1.50533	1.71	1.715	1.662	0.092	1.60367	1.521	1.422	1.095	0.092	1.254	1.438	1.65	1.666	0.223	1.49067	1.593	1.579	1.391	0.094	1.427	1.949	1.214	1.668	0.092	1.51833	1.617	1.487	1.816
	22:00:12	1.492	1.684	1.671	0.093	1.52267	1.501	1.532	1.543	0.094	1.43133	0.838	0.673	1.062	0.092	0.765667	1.657	1.403	1.755	0.092	1.513	1.661	1.735	1.645	0.092	1.58833	1.58	1.485	1.136	0.092	1.30833	1.438	1.665	1.672	0.224	1.49767	1.587	1.568	1.453	0.094	1.442	1.962	1.231	1.701	0.092	1.53933	1.629	1.506	1.825
	22:15:12	1.496	1.688	1.674	0.093	1.52633	1.492	1.529	1.546	0.094	1.42833	0.85	0.673	1.105	0.092	0.784	1.662	1.411	1.764	0.092	1.52033	1.594	1.749	1.631	0.093	1.565	1.635	1.545	1.15	0.092	1.35133	1.437	1.677	1.677	0.225	1.503	1.58	1.56	1.504	0.094	1.454	1.972	1.248	1.732	0.092	1.55867	1.639	1.523	1.833
	22:30:12	1.5	1.69	1.677	0.092	1.53033	1.483	1.524	1.544	0.094	1.423	0.863	0.674	1.153	0.092	0.804667	1.666	1.419	1.771	0.092	1.52667	1.556	1.754	1.62	0.092	1.55133	1.684	1.604	1.176	0.092	1.396	1.435	1.689	1.681	0.226	1.50767	1.573	1.552	1.528	0.094	1.457	1.98	1.269	1.759	0.092	1.57733	1.649	1.541	1.84
	22:45:12	1.504	1.694	1.68	0.093	1.533	1.474	1.514	1.537	0.094	1.41433	0.879	0.675	1.2	0.092	0.826	1.669	1.428	1.777	0.092	1.53267	1.533	1.753	1.613	0.093	1.54	1.736	1.657	1.208	0.092	1.44167	1.432	1.699	1.685	0.228	1.51133	1.565	1.544	1.538	0.094	1.455	1.989	1.298	1.781	0.092	1.59733	1.658	1.557	1.847
	23:00:12	1.506	1.695	1.683	0.093	1.535	1.464	1.5	1.527	0.094	1.403	0.894	0.675	1.247	0.092	0.846667	1.672	1.436	1.783	0.092	1.53833	1.518	1.749	1.608	0.092	1.533	1.777	1.704	1.245	0.092	1.48333	1.428	1.708	1.688	0.229	1.514	1.556	1.535	1.546	0.094	1.45167	1.999	1.335	1.799	0.092	1.619	1.666	1.572	1.854
	23:15:12	1.51	1.698	1.685	0.093	1.538	1.453	1.486	1.493	0.094	1.38333	0.91	0.676	1.293	0.092	0.867667	1.674	1.444	1.787	0.092	1.543	1.509	1.746	1.603	0.092	1.52733	1.807	1.742	1.289	0.092	1.52067	1.426	1.715	1.69	0.23	1.51633	1.545	1.523	1.554	0.094	1.44667	2.008	1.381	1.819	0.092	1.644	1.673	1.587	1.861
	23:30:12	1.512	1.7	1.688	0.092	1.54133	1.444	1.473	1.489	0.094	1.37467	0.926	0.677	1.336	0.092	0.887667	1.675	1.452	1.79	0.092	1.547	1.503	1.738	1.595	0.092	1.52	1.836	1.778	1.338	0.092	1.55867	1.434	1.722	1.693	0.231	1.52233	1.535	1.509	1.562	0.094	1.44133	2.015	1.43	1.835	0.092	1.668	1.679	1.601	1.867
	23:45:12	1.514	1.701	1.69	0.092	1.543	1.437	1.434	1.476	0.094	1.355	0.943	0.677	1.377	0.092	0.907	1.677	1.459	1.793	0.092	1.551	1.504	1.731	1.586	0.092	1.515	1.854	1.8	1.388	0.092	1.58867	1.452	1.728	1.695	0.233	1.531	1.529	1.492	1.571	0.094	1.43667	2.02	1.482	1.85	0.092	1.692	1.684	1.614	1.873
	1 day, 0:00:12	1.516	1.704	1.692	0.092	1.54533	1.433	1.433	1.462	0.094	1.34867	0.961	0.678	1.416	0.092	0.926333	1.678	1.464	1.796	0.092	1.554	1.504	1.721	1.574	0.092	1.50767	1.871	1.821	1.442	0.092	1.61933	1.479	1.734	1.698	0.234	1.543	1.519	1.475	1.579	0.094	1.43033	2.026	1.533	1.862	0.092	1.715	1.688	1.627	1.88
	1 day, 0:15:12	1.517	1.706	1.694	0.092	1.547	1.429	1.421	1.445	0.094	1.33767	0.982	0.678	1.453	0.092	0.945667	1.679	1.47	1.797	0.092	1.55667	1.505	1.71	1.558	0.093	1.498	1.888	1.84	1.497	0.092	1.64967	1.504	1.738	1.7	0.233	1.55333	1.508	1.463	1.587	0.094	1.42533	2.031	1.587	1.872	0.092	1.738	1.692	1.639	1.885
	1 day, 0:30:12	1.518	1.708	1.696	0.092	1.54867	1.425	1.411	1.432	0.094	1.32867	1.008	0.678	1.484	0.092	0.964667	1.68	1.474	1.8	0.092	1.55933	1.509	1.695	1.543	0.092	1.49033	1.907	1.865	1.551	0.092	1.68233	1.52	1.742	1.702	0.233	1.56067	1.496	1.459	1.594	0.094	1.42233	2.035	1.639	1.878	0.092	1.75867	1.694	1.649	1.891
	1 day, 0:45:12	1.52	1.709	1.698	0.092	1.55033	1.42	1.403	1.421	0.094	1.32067	1.04	0.678	1.514	0.092	0.985333	1.682	1.478	1.802	0.092	1.562	1.514	1.677	1.526	0.092	1.48033	1.928	1.892	1.606	0.092	1.71667	1.52	1.746	1.704	0.235	1.56267	1.481	1.463	1.601	0.094	1.421	2.038	1.688	1.883	0.092	1.77767	1.697	1.659	1.896
	1 day, 1:00:12	1.52	1.711	1.699	0.093	1.55033	1.413	1.398	1.414	0.094	1.31433	1.076	0.678	1.542	0.092	1.00667	1.682	1.48	1.804	0.092	1.56333	1.518	1.657	1.51	0.092	1.46967	1.947	1.938	1.653	0.092	1.754	1.512	1.75	1.706	0.236	1.562	1.463	1.469	1.606	0.094	1.41867	2.044	1.73	1.889	0.092	1.79567	1.701	1.668	1.9
	1 day, 1:15:12	1.521	1.712	1.701	0.093	1.55167	1.406	1.393	1.411	0.094	1.30933	1.117	0.678	1.567	0.092	1.02867	1.684	1.484	1.806	0.092	1.566	1.521	1.637	1.492	0.093	1.457	1.963	1.967	1.697	0.092	1.78367	1.505	1.753	1.709	0.237	1.56167	1.447	1.47	1.61	0.094	1.415	2.05	1.768	1.892	0.092	1.81133	1.703	1.678	1.905
	1 day, 1:30:12	1.522	1.714	1.702	0.093	1.553	1.402	1.39	1.408	0.094	1.306	1.161	0.678	1.589	0.092	1.05067	1.685	1.487	1.808	0.092	1.568	1.524	1.616	1.477	0.092	1.447	1.976	1.989	1.736	0.092	1.80833	1.501	1.756	1.71	0.237	1.56167	1.435	1.473	1.612	0.094	1.41267	2.057	1.803	1.895	0.092	1.82633	1.705	1.685	1.909
	1 day, 1:45:12	1.522	1.715	1.704	0.092	1.555	1.398	1.388	1.407	0.094	1.30367	1.207	0.677	1.608	0.092	1.072	1.686	1.489	1.811	0.092	1.57	1.527	1.596	1.464	0.092	1.437	1.988	2.006	1.771	0.092	1.82967	1.5	1.76	1.712	0.239	1.56333	1.428	1.475	1.611	0.094	1.41067	2.065	1.831	1.899	0.092	1.83967	1.708	1.692	1.913
	1 day, 2:00:12	1.523	1.716	1.705	0.092	1.556	1.396	1.386	1.405	0.094	1.30167	1.252	0.676	1.627	0.092	1.093	1.688	1.491	1.813	0.092	1.572	1.528	1.576	1.454	0.093	1.42633	1.998	2.018	1.803	0.092	1.84767	1.5	1.764	1.714	0.239	1.56533	1.423	1.479	1.61	0.094	1.41	2.072	1.855	1.901	0.092	1.85067	1.71	1.698	1.917
	1 day, 2:15:12	1.524	1.716	1.707	0.092	1.557	1.396	1.383	1.405	0.094	1.30067	1.297	0.674	1.646	0.092	1.11367	1.689	1.493	1.815	0.092	1.57367	1.53	1.557	1.447	0.092	1.41933	2.006	2.028	1.827	0.091	1.86267	1.501	1.767	1.715	0.239	1.567	1.423	1.479	1.608	0.094	1.40933	2.08	1.874	1.903	0.092	1.86033	1.711	1.704	1.919
	1 day, 2:30:12	1.525	1.717	1.708	0.092	1.558	1.396	1.38	1.403	0.094	1.299	1.339	0.67	1.663	0.092	1.132	1.691	1.494	1.818	0.092	1.57567	1.53	1.54	1.442	0.092	1.412	2.015	2.04	1.849	0.091	1.877	1.501	1.77	1.716	0.239	1.56833	1.424	1.482	1.605	0.093	1.41067	2.087	1.889	1.905	0.092	1.86833	1.713	1.708	1.922
	1 day, 2:45:12	1.526	1.718	1.709	0.093	1.558	1.396	1.378	1.403	0.094	1.29833	1.38	0.671	1.682	0.092	1.15233	1.693	1.495	1.82	0.092	1.57733	1.532	1.526	1.44	0.093	1.40633	2.024	2.05	1.874	0.092	1.89067	1.502	1.773	1.719	0.241	1.57067	1.425	1.483	1.6	0.094	1.40867	2.094	1.903	1.907	0.092	1.876	1.716	1.712	1.925
	1 day, 3:00:12	1.528	1.718	1.71	0.092	1.56	1.397	1.375	1.402	0.094	1.29733	1.418	0.686	1.696	0.092	1.17467	1.694	1.498	1.822	0.092	1.57933	1.534	1.517	1.437	0.092	1.404	2.032	2.056	1.891	0.092	1.901	1.503	1.776	1.72	0.242	1.57233	1.427	1.482	1.594	0.094	1.407	2.1	1.917	1.909	0.092	1.88333	1.717	1.717	1.928
	1 day, 3:15:12	1.528	1.719	1.712	0.092	1.561	1.4	1.374	1.405	0.094	1.299	1.454	0.725	1.706	0.092	1.203	1.695	1.5	1.825	0.092	1.58133	1.536	1.51	1.445	0.093	1.404	2.037	2.063	1.911	0.092	1.91167	1.504	1.78	1.722	0.242	1.57467	1.424	1.483	1.588	0.094	1.40433	2.104	1.929	1.907	0.092	1.888	1.72	1.72	1.931
	1 day, 3:30:12	1.53	1.72	1.714	0.093	1.56167	1.401	1.372	1.406	0.094	1.299	1.488	0.791	1.716	0.092	1.23967	1.697	1.501	1.827	0.092	1.583	1.538	1.502	1.446	0.092	1.40333	2.042	2.068	1.931	0.092	1.92167	1.505	1.783	1.723	0.242	1.57633	1.422	1.484	1.581	0.094	1.40167	2.109	1.937	1.907	0.092	1.89233	1.721	1.724	1.934
	1 day, 3:45:12	1.53	1.719	1.714	0.092	1.56233	1.404	1.37	1.407	0.094	1.29967	1.515	0.889	1.723	0.092	1.28367	1.698	1.502	1.829	0.092	1.58433	1.541	1.498	1.448	0.093	1.40267	2.048	2.071	1.946	0.092	1.92967	1.506	1.786	1.725	0.244	1.57833	1.422	1.486	1.575	0.093	1.40133	2.113	1.944	1.905	0.092	1.89533	1.723	1.728	1.938
	1 day, 4:00:12	1.531	1.719	1.716	0.093	1.56233	1.407	1.372	1.408	0.094	1.30167	1.541	1.01	1.728	0.092	1.33433	1.7	1.504	1.831	0.092	1.58633	1.544	1.495	1.452	0.093	1.404	2.053	2.076	1.96	0.092	1.93767	1.508	1.789	1.726	0.245	1.58033	1.422	1.487	1.565	0.094	1.39733	2.115	1.949	1.905	0.092	1.89767	1.725	1.731	1.943
	1 day, 4:15:12	1.532	1.719	1.717	0.093	1.563	1.411	1.374	1.408	0.094	1.30367	1.567	1.143	1.732	0.092	1.38867	1.701	1.506	1.834	0.092	1.58833	1.544	1.494	1.456	0.093	1.405	2.057	2.078	1.972	0.092	1.94367	1.508	1.792	1.728	0.244	1.582	1.422	1.487	1.552	0.094	1.393	2.117	1.948	1.911	0.092	1.9	1.726	1.734	1.948
	1 day, 4:30:12	1.533	1.719	1.717	0.092	1.56433	1.416	1.377	1.41	0.094	1.307	1.59	1.268	1.736	0.092	1.43933	1.702	1.507	1.835	0.092	1.58933	1.547	1.494	1.459	0.093	1.407	2.061	2.079	1.983	0.092	1.949	1.509	1.796	1.729	0.245	1.584	1.422	1.489	1.534	0.094	1.38767	2.116	1.944	1.91	0.092	1.898	1.728	1.737	1.952
	1 day, 4:45:12	1.533	1.719	1.719	0.092	1.565	1.419	1.38	1.412	0.094	1.30967	1.611	1.356	1.734	0.092	1.475	1.704	1.509	1.837	0.092	1.59133	1.549	1.498	1.462	0.092	1.411	2.064	2.08	1.989	0.091	1.95333	1.511	1.799	1.73	0.247	1.586	1.422	1.491	1.516	0.094	1.38233	2.113	1.943	1.91	0.092	1.89667	1.729	1.739	1.961
	1 day, 5:00:12	1.534	1.719	1.72	0.093	1.56467	1.424	1.383	1.416	0.094	1.31367	1.63	1.423	1.735	0.092	1.504	1.704	1.511	1.839	0.092	1.59267	1.553	1.504	1.464	0.092	1.415	2.067	2.08	1.994	0.091	1.956	1.512	1.802	1.732	0.246	1.588	1.423	1.494	1.499	0.094	1.378	2.106	1.944	1.908	0.092	1.894	1.731	1.742	1.966
	1 day, 5:15:12	1.534	1.719	1.721	0.093	1.565	1.427	1.389	1.422	0.094	1.31867	1.648	1.476	1.735	0.092	1.52767	1.705	1.514	1.842	0.092	1.595	1.556	1.506	1.467	0.093	1.41667	2.068	2.079	1.998	0.091	1.95733	1.513	1.805	1.733	0.247	1.58967	1.424	1.496	1.485	0.094	1.37433	2.098	1.948	1.909	0.092	1.893	1.732	1.744	1.968
	1 day, 5:30:12	1.535	1.719	1.722	0.092	1.56667	1.433	1.396	1.425	0.094	1.324	1.662	1.516	1.734	0.092	1.54533	1.707	1.515	1.844	0.092	1.59667	1.559	1.509	1.469	0.092	1.42033	2.07	2.079	2	0.092	1.95767	1.514	1.807	1.734	0.249	1.591	1.424	1.496	1.478	0.094	1.372	2.088	1.952	1.909	0.092	1.891	1.733	1.747	1.97
	1 day, 5:45:12	1.536	1.719	1.723	0.092	1.56733	1.437	1.399	1.431	0.094	1.32833	1.674	1.549	1.729	0.092	1.55867	1.708	1.517	1.846	0.092	1.59833	1.56	1.512	1.47	0.092	1.422	2.071	2.078	2.001	0.091	1.959	1.516	1.809	1.735	0.249	1.59267	1.426	1.5	1.474	0.094	1.37267	2.078	1.955	1.911	0.092	1.88933	1.735	1.75	1.972
	1 day, 6:00:12	1.536	1.718	1.724	0.092	1.56733	1.441	1.404	1.436	0.094	1.333	1.681	1.569	1.727	0.092	1.567	1.709	1.52	1.848	0.092	1.60033	1.565	1.514	1.472	0.092	1.425	2.072	2.078	2.003	0.092	1.959	1.518	1.811	1.736	0.25	1.59433	1.428	1.502	1.468	0.094	1.372	2.063	1.961	1.909	0.092	1.88567	1.736	1.752	1.972
	1 day, 6:15:12	1.537	1.718	1.725	0.092	1.568	1.446	1.41	1.44	0.094	1.338	1.688	1.583	1.726	0.092	1.57367	1.71	1.522	1.849	0.092	1.60167	1.566	1.516	1.473	0.093	1.42533	2.072	2.077	2.005	0.092	1.95933	1.519	1.814	1.736	0.251	1.59567	1.431	1.504	1.464	0.094	1.37233	2.051	1.964	1.907	0.092	1.882	1.737	1.754	1.975
	1 day, 6:30:12	1.538	1.718	1.725	0.092	1.56833	1.45	1.415	1.444	0.094	1.34233	1.695	1.599	1.722	0.092	1.58	1.711	1.524	1.851	0.092	1.60333	1.569	1.52	1.475	0.092	1.42933	2.072	2.076	2.005	0.091	1.96	1.519	1.815	1.737	0.253	1.59633	1.433	1.505	1.474	0.094	1.37667	2.039	1.967	1.903	0.092	1.87767	1.737	1.756	1.976
	1 day, 6:45:12	1.538	1.718	1.726	0.093	1.56767	1.454	1.421	1.45	0.094	1.34767	1.698	1.605	1.719	0.092	1.582	1.712	1.526	1.853	0.092	1.605	1.571	1.523	1.478	0.092	1.432	2.072	2.075	2.006	0.092	1.959	1.52	1.818	1.738	0.255	1.598	1.436	1.507	1.479	0.094	1.38	2.037	1.97	1.903	0.092	1.878	1.738	1.759	1.978
	1 day, 7:00:12	1.539	1.718	1.727	0.093	1.56833	1.459	1.427	1.453	0.094	1.35233	1.7	1.612	1.714	0.092	1.58333	1.713	1.528	1.854	0.092	1.60633	1.576	1.525	1.484	0.092	1.43633	2.073	2.074	2.007	0.091	1.96033	1.522	1.82	1.739	0.254	1.59967	1.438	1.512	1.478	0.094	1.382	2.036	1.976	1.898	0.092	1.878	1.739	1.761	1.978
	1 day, 7:15:12	1.539	1.717	1.727	0.092	1.569	1.464	1.435	1.458	0.094	1.35833	1.701	1.617	1.712	0.092	1.58467	1.713	1.53	1.856	0.092	1.60767	1.58	1.528	1.486	0.092	1.43933	2.072	2.073	2.007	0.091	1.95967	1.523	1.822	1.74	0.257	1.601	1.441	1.516	1.482	0.093	1.38667	2.038	1.979	1.897	0.092	1.87933	1.74	1.763	1.979
	1 day, 7:30:12	1.54	1.717	1.728	0.093	1.56867	1.47	1.44	1.463	0.094	1.36367	1.7	1.619	1.709	0.092	1.584	1.713	1.532	1.858	0.092	1.609	1.583	1.53	1.488	0.092	1.44167	2.072	2.072	2.008	0.092	1.95867	1.524	1.823	1.741	0.257	1.602	1.442	1.519	1.486	0.094	1.38833	2.038	1.983	1.895	0.092	1.88	1.741	1.765	1.979
	1 day, 7:45:12	1.54	1.717	1.728	0.093	1.56867	1.476	1.447	1.47	0.094	1.37033	1.697	1.62	1.704	0.092	1.58167	1.714	1.534	1.859	0.092	1.61033	1.585	1.534	1.491	0.092	1.44467	2.071	2.071	2.009	0.092	1.95833	1.525	1.825	1.742	0.26	1.60333	1.443	1.524	1.483	0.094	1.38933	2.04	1.986	1.896	0.092	1.882	1.741	1.767	1.981
	1 day, 8:00:12	1.54	1.716	1.728	0.092	1.56933	1.483	1.454	1.474	0.094	1.37633	1.696	1.618	1.7	0.092	1.57933	1.714	1.535	1.86	0.092	1.611	1.589	1.536	1.494	0.092	1.44767	2.071	2.069	2.008	0.092	1.95733	1.526	1.827	1.742	0.26	1.60433	1.445	1.527	1.488	0.094	1.39267	2.039	1.988	1.886	0.092	1.879	1.741	1.768	1.98
	1 day, 8:15:12	1.541	1.716	1.728	0.092	1.56967	1.489	1.459	1.48	0.094	1.382	1.691	1.617	1.698	0.092	1.57667	1.715	1.537	1.862	0.092	1.61267	1.592	1.538	1.498	0.092	1.45067	2.069	2.068	2.009	0.092	1.95667	1.527	1.829	1.742	0.263	1.60533	1.448	1.532	1.493	0.094	1.397	2.036	1.989	1.89	0.092	1.87967	1.742	1.77	1.982
	1 day, 8:30:12	1.541	1.715	1.729	0.093	1.56867	1.495	1.467	1.486	0.094	1.38867	1.688	1.615	1.695	0.092	1.574	1.715	1.538	1.863	0.092	1.61333	1.594	1.541	1.501	0.092	1.45333	2.069	2.067	2.008	0.092	1.956	1.528	1.83	1.742	0.264	1.606	1.452	1.536	1.495	0.094	1.40033	2.033	1.99	1.89	0.092	1.879	1.742	1.771	1.979
	1 day, 8:45:12	1.542	1.715	1.73	0.092	1.57033	1.499	1.472	1.494	0.094	1.39433	1.682	1.612	1.693	0.092	1.57033	1.716	1.539	1.864	0.092	1.61433	1.599	1.542	1.506	0.092	1.457	2.068	2.065	2.007	0.091	1.95567	1.528	1.832	1.743	0.267	1.607	1.453	1.536	1.496	0.094	1.401	2.029	1.989	1.887	0.092	1.87633	1.743	1.773	1.978
	1 day, 9:00:12	1.542	1.714	1.73	0.092	1.57	1.506	1.484	1.498	0.094	1.402	1.676	1.608	1.684	0.092	1.564	1.716	1.54	1.866	0.092	1.61533	1.603	1.545	1.508	0.093	1.459	2.067	2.063	2.007	0.092	1.95367	1.53	1.833	1.744	0.269	1.60833	1.455	1.538	1.5	0.094	1.40367	2.026	1.988	1.885	0.092	1.87433	1.743	1.775	1.98
	1 day, 9:15:12	1.543	1.713	1.73	0.093	1.569	1.51	1.49	1.503	0.094	1.407	1.674	1.604	1.682	0.092	1.56133	1.716	1.542	1.866	0.092	1.616	1.606	1.55	1.51	0.092	1.46333	2.066	2.062	2.006	0.092	1.95267	1.53	1.835	1.744	0.271	1.609	1.457	1.54	1.502	0.094	1.40567	2.024	1.99	1.886	0.092	1.87467	1.743	1.776	1.983
	1 day, 9:30:12	1.543	1.713	1.73	0.092	1.57	1.513	1.495	1.511	0.094	1.41233	1.663	1.602	1.681	0.092	1.55667	1.717	1.544	1.867	0.092	1.61733	1.609	1.554	1.509	0.092	1.46533	2.066	2.061	2.005	0.092	1.952	1.531	1.836	1.744	0.274	1.60967	1.46	1.543	1.503	0.094	1.408	2.021	1.989	1.884	0.092	1.87267	1.744	1.778	1.985
	1 day, 9:45:12	1.543	1.712	1.729	0.092	1.56933	1.519	1.503	1.517	0.094	1.419	1.662	1.597	1.69	0.092	1.55767	1.717	1.545	1.869	0.092	1.61833	1.61	1.556	1.511	0.092	1.467	2.064	2.06	2.005	0.092	1.951	1.532	1.837	1.744	0.273	1.61033	1.461	1.543	1.507	0.093	1.41067	2.02	1.988	1.889	0.092	1.87367	1.744	1.779	1.987
	1 day, 10:00:12	1.544	1.712	1.73	0.092	1.57	1.523	1.508	1.526	0.094	1.425	1.657	1.594	1.697	0.092	1.55733	1.717	1.546	1.869	0.092	1.61867	1.612	1.558	1.515	0.092	1.46967	2.062	2.059	2.005	0.091	1.951	1.533	1.837	1.744	0.279	1.61067	1.462	1.547	1.511	0.093	1.41367	2.018	1.99	1.889	0.092	1.87367	1.744	1.78	1.988
	1 day, 10:15:12	1.544	1.711	1.729	0.092	1.56933	1.53	1.515	1.531	0.094	1.43133	1.654	1.591	1.697	0.092	1.55533	1.716	1.548	1.87	0.092	1.61933	1.613	1.558	1.521	0.092	1.472	2.061	2.058	2.004	0.091	1.95	1.533	1.838	1.745	0.28	1.61133	1.468	1.55	1.512	0.094	1.416	2.016	1.989	1.891	0.092	1.87333	1.744	1.782	1.991
	1 day, 10:30:12	1.545	1.71	1.729	0.093	1.56833	1.53	1.516	1.537	0.094	1.43367	1.65	1.587	1.701	0.092	1.554	1.717	1.549	1.871	0.092	1.62033	1.615	1.561	1.525	0.092	1.475	2.059	2.06	2.004	0.092	1.949	1.535	1.839	1.745	0.283	1.61233	1.467	1.554	1.518	0.094	1.419	2.014	1.989	1.889	0.092	1.872	1.744	1.783	1.992
	1 day, 10:45:12	1.545	1.71	1.729	0.093	1.56833	1.541	1.524	1.542	0.094	1.44167	1.642	1.584	1.701	0.092	1.55033	1.717	1.55	1.873	0.092	1.62133	1.616	1.564	1.527	0.093	1.476	2.058	2.06	2.003	0.092	1.94833	1.536	1.84	1.745	0.284	1.613	1.476	1.555	1.526	0.094	1.425	2.012	1.988	1.893	0.092	1.87233	1.745	1.784	1.993
	1 day, 11:00:12	1.545	1.708	1.729	0.092	1.56867	1.543	1.531	1.55	0.094	1.44733	1.639	1.581	1.702	0.092	1.54867	1.717	1.551	1.873	0.092	1.62167	1.62	1.573	1.528	0.092	1.48167	2.057	2.059	2.002	0.092	1.94733	1.536	1.84	1.745	0.287	1.613	1.482	1.558	1.535	0.093	1.432	2.011	1.986	1.895	0.092	1.872	1.745	1.786	1.993
	1 day, 11:15:12	1.546	1.708	1.729	0.092	1.569	1.547	1.536	1.554	0.094	1.45167	1.635	1.578	1.704	0.092	1.547	1.717	1.552	1.875	0.092	1.62267	1.62	1.575	1.528	0.092	1.48233	2.055	2.058	2.001	0.092	1.946	1.537	1.841	1.745	0.289	1.61367	1.484	1.559	1.546	0.094	1.43567	2.005	1.984	1.891	0.092	1.868	1.745	1.786	1.994
	1 day, 11:30:12	1.545	1.707	1.729	0.092	1.56833	1.551	1.542	1.561	0.094	1.45733	1.629	1.575	1.704	0.092	1.544	1.716	1.553	1.875	0.092	1.62267	1.625	1.575	1.529	0.092	1.48433	2.051	2.057	2	0.092	1.944	1.538	1.841	1.745	0.29	1.614	1.494	1.562	1.557	0.094	1.44367	1.997	1.984	1.897	0.092	1.86733	1.745	1.787	1.994
	1 day, 11:45:12	1.545	1.706	1.729	0.093	1.567	1.555	1.546	1.562	0.094	1.46033	1.627	1.571	1.702	0.092	1.54133	1.716	1.554	1.877	0.092	1.62367	1.626	1.577	1.53	0.092	1.48567	2.05	2.056	1.999	0.092	1.943	1.538	1.841	1.745	0.292	1.614	1.492	1.563	1.564	0.094	1.44567	1.991	1.982	1.897	0.092	1.86467	1.745	1.789	1.995
	1 day, 12:00:12	1.546	1.706	1.729	0.092	1.56833	1.559	1.55	1.568	0.094	1.465	1.623	1.568	1.7	0.092	1.53833	1.716	1.555	1.877	0.092	1.624	1.632	1.578	1.53	0.092	1.488	2.049	2.055	1.998	0.091	1.943	1.539	1.84	1.745	0.294	1.614	1.5	1.567	1.557	0.094	1.44733	1.984	1.981	1.897	0.092	1.862	1.745	1.789	1.996
	1 day, 12:15:12	1.545	1.704	1.728	0.092	1.567	1.564	1.556	1.572	0.094	1.47	1.619	1.565	1.699	0.092	1.53567	1.715	1.556	1.877	0.092	1.624	1.633	1.579	1.533	0.092	1.48967	2.045	2.055	1.997	0.091	1.94133	1.54	1.842	1.744	0.295	1.61467	1.497	1.566	1.556	0.093	1.44667	1.974	1.98	1.897	0.092	1.85833	1.745	1.79	1.996
	1 day, 12:30:12	1.545	1.703	1.728	0.092	1.56667	1.568	1.561	1.575	0.094	1.474	1.615	1.563	1.698	0.092	1.53333	1.716	1.557	1.878	0.092	1.625	1.639	1.58	1.534	0.092	1.49233	2.043	2.055	1.997	0.091	1.94067	1.54	1.843	1.745	0.299	1.61533	1.513	1.573	1.548	0.094	1.45067	1.973	1.98	1.897	0.092	1.858	1.744	1.792	1.995
	1 day, 12:45:12	1.545	1.703	1.727	0.093	1.56533	1.573	1.57	1.58	0.094	1.48033	1.612	1.56	1.686	0.092	1.52733	1.716	1.557	1.879	0.092	1.62533	1.639	1.583	1.534	0.092	1.49333	2.04	2.054	1.996	0.092	1.938	1.541	1.843	1.745	0.301	1.61567	1.507	1.573	1.557	0.094	1.45167	1.971	1.979	1.897	0.092	1.857	1.745	1.793	1.994
	1 day, 13:00:12	1.546	1.702	1.727	0.093	1.56533	1.577	1.573	1.582	0.094	1.48333	1.608	1.557	1.684	0.092	1.52433	1.715	1.558	1.88	0.092	1.62567	1.645	1.584	1.537	0.092	1.49667	2.04	2.052	1.996	0.092	1.93733	1.542	1.842	1.745	0.304	1.61567	1.512	1.576	1.567	0.094	1.45767	1.97	1.978	1.897	0.092	1.85633	1.745	1.794	1.993
	1 day, 13:15:12	1.546	1.7	1.726	0.093	1.56433	1.581	1.577	1.589	0.094	1.48833	1.605	1.555	1.685	0.092	1.523	1.715	1.559	1.88	0.092	1.626	1.644	1.587	1.54	0.092	1.49833	2.035	2.049	1.995	0.092	1.93433	1.543	1.842	1.745	0.306	1.616	1.512	1.578	1.581	0.093	1.464	1.97	1.978	1.897	0.092	1.85633	1.745	1.794	1.992
	1 day, 13:30:12	1.546	1.7	1.726	0.092	1.56533	1.585	1.581	1.591	0.094	1.49167	1.602	1.553	1.686	0.092	1.52167	1.714	1.559	1.881	0.092	1.626	1.65	1.588	1.541	0.092	1.501	2.033	2.048	1.993	0.091	1.93367	1.544	1.844	1.745	0.309	1.617	1.512	1.581	1.585	0.093	1.46633	1.968	1.977	1.897	0.092	1.85533	1.745	1.795	1.992
	1 day, 13:45:12	1.546	1.699	1.725	0.092	1.56467	1.587	1.588	1.597	0.094	1.49667	1.6	1.55	1.686	0.092	1.52	1.714	1.56	1.881	0.092	1.62633	1.649	1.589	1.542	0.092	1.50133	2.027	2.048	1.992	0.092	1.93033	1.544	1.843	1.745	0.309	1.61667	1.526	1.581	1.578	0.094	1.46767	1.968	1.976	1.897	0.092	1.855	1.744	1.796	1.991
	1 day, 14:00:12	1.546	1.697	1.725	0.092	1.564	1.59	1.594	1.599	0.094	1.50033	1.595	1.548	1.686	0.092	1.51767	1.713	1.561	1.881	0.092	1.62633	1.654	1.591	1.542	0.092	1.50367	2.024	2.046	1.991	0.091	1.92933	1.545	1.839	1.745	0.311	1.61567	1.524	1.584	1.587	0.093	1.472	1.967	1.975	1.897	0.092	1.85433	1.744	1.797	1.989
	1 day, 14:15:12	1.546	1.696	1.724	0.092	1.56333	1.595	1.597	1.606	0.094	1.50533	1.592	1.547	1.685	0.092	1.516	1.713	1.561	1.882	0.092	1.62667	1.653	1.595	1.544	0.092	1.50533	2.02	2.044	1.99	0.092	1.926	1.546	1.836	1.745	0.314	1.615	1.542	1.584	1.592	0.094	1.47867	1.966	1.974	1.892	0.092	1.852	1.744	1.798	1.989
	1 day, 14:30:12	1.546	1.695	1.724	0.093	1.562	1.599	1.603	1.605	0.094	1.50833	1.589	1.545	1.688	0.092	1.51533	1.713	1.562	1.882	0.092	1.627	1.657	1.596	1.546	0.092	1.50767	2.018	2.042	1.988	0.092	1.924	1.546	1.833	1.745	0.317	1.614	1.532	1.588	1.602	0.094	1.48	1.964	1.969	1.89	0.092	1.849	1.744	1.798	1.988
	1 day, 14:45:12	1.546	1.694	1.724	0.093	1.56167	1.603	1.603	1.613	0.094	1.51233	1.586	1.543	1.689	0.092	1.514	1.712	1.563	1.883	0.092	1.62733	1.656	1.598	1.548	0.092	1.50867	2.012	2.041	1.987	0.092	1.92133	1.547	1.835	1.744	0.319	1.61467	1.545	1.592	1.619	0.094	1.49133	1.961	1.966	1.887	0.092	1.846	1.744	1.8	1.988
	1 day, 15:00:12	1.546	1.693	1.723	0.092	1.562	1.606	1.608	1.611	0.094	1.51433	1.583	1.541	1.688	0.092	1.512	1.712	1.562	1.884	0.092	1.62733	1.66	1.599	1.55	0.092	1.511	2.007	2.039	1.986	0.091	1.91967	1.547	1.833	1.745	0.32	1.61433	1.54	1.603	1.603	0.093	1.489	1.961	1.964	1.892	0.092	1.847	1.744	1.8	1.987
	1 day, 15:15:12	1.546	1.692	1.722	0.093	1.56033	1.609	1.611	1.617	0.094	1.51833	1.58	1.539	1.687	0.092	1.51	1.712	1.563	1.885	0.092	1.628	1.659	1.6	1.55	0.092	1.511	2	2.037	1.985	0.091	1.91633	1.548	1.832	1.744	0.323	1.614	1.552	1.601	1.622	0.093	1.49867	1.959	1.959	1.891	0.092	1.84433	1.744	1.801	1.986
	1 day, 15:30:12	1.546	1.691	1.722	0.092	1.561	1.61	1.614	1.616	0.094	1.51933	1.578	1.537	1.685	0.092	1.508	1.711	1.563	1.887	0.092	1.62833	1.664	1.601	1.55	0.092	1.513	1.994	2.035	1.983	0.091	1.913	1.548	1.83	1.744	0.326	1.61333	1.553	1.614	1.626	0.094	1.50367	1.956	1.956	1.889	0.092	1.84167	1.744	1.802	1.986
	1 day, 15:45:12	1.546	1.69	1.721	0.092	1.56033	1.615	1.616	1.623	0.094	1.524	1.575	1.535	1.683	0.092	1.50567	1.71	1.564	1.889	0.092	1.629	1.661	1.603	1.552	0.092	1.51333	1.989	2.035	1.982	0.091	1.911	1.549	1.828	1.744	0.327	1.613	1.552	1.607	1.622	0.094	1.49967	1.953	1.954	1.889	0.092	1.84	1.743	1.802	1.985
	1 day, 16:00:12	1.546	1.688	1.721	0.092	1.55967	1.615	1.622	1.624	0.094	1.52633	1.573	1.533	1.683	0.092	1.50433	1.71	1.564	1.894	0.092	1.63067	1.667	1.603	1.554	0.092	1.516	1.988	2.032	1.981	0.091	1.90933	1.549	1.827	1.744	0.33	1.61267	1.579	1.617	1.631	0.093	1.516	1.948	1.953	1.888	0.092	1.83767	1.743	1.803	1.985
	1 day, 16:15:12	1.547	1.687	1.72	0.093	1.55833	1.621	1.621	1.627	0.094	1.529	1.571	1.531	1.681	0.092	1.50233	1.709	1.565	1.883	0.092	1.627	1.666	1.607	1.555	0.092	1.51733	1.986	2.032	1.978	0.092	1.90667	1.55	1.826	1.744	0.331	1.61267	1.571	1.617	1.614	0.094	1.50667	1.952	1.954	1.887	0.092	1.839	1.743	1.804	1.985
	1 day, 16:30:12	1.546	1.686	1.719	0.092	1.55833	1.621	1.625	1.626	0.094	1.53	1.568	1.529	1.68	0.092	1.50033	1.709	1.565	1.884	0.092	1.62733	1.669	1.607	1.555	0.092	1.51833	1.983	2.032	1.975	0.091	1.90567	1.552	1.823	1.743	0.333	1.612	1.589	1.619	1.6	0.094	1.50867	1.95	1.965	1.887	0.092	1.842	1.742	1.804	1.984
	1 day, 16:45:12	1.546	1.685	1.719	0.092	1.558	1.625	1.626	1.627	0.094	1.532	1.565	1.527	1.678	0.092	1.498	1.708	1.566	1.883	0.092	1.627	1.669	1.609	1.558	0.092	1.52	1.982	2.03	1.975	0.091	1.90467	1.552	1.822	1.743	0.335	1.61167	1.586	1.618	1.591	0.093	1.50533	1.949	1.969	1.883	0.092	1.84167	1.742	1.805	1.983
	1 day, 17:00:12	1.546	1.684	1.718	0.093	1.55633	1.622	1.63	1.629	0.094	1.533	1.563	1.525	1.675	0.092	1.49567	1.707	1.566	1.887	0.092	1.628	1.674	1.609	1.559	0.092	1.522	1.978	2.029	1.974	0.092	1.90167	1.552	1.82	1.743	0.337	1.611	1.594	1.619	1.568	0.094	1.49967	1.947	1.972	1.881	0.092	1.84133	1.742	1.806	1.982
	1 day, 17:15:12	1.546	1.683	1.718	0.093	1.556	1.627	1.631	1.63	0.094	1.53533	1.56	1.524	1.67	0.092	1.49267	1.706	1.567	1.883	0.092	1.62667	1.67	1.612	1.559	0.092	1.52167	1.975	2.028	1.973	0.091	1.901	1.553	1.818	1.743	0.34	1.61067	1.589	1.621	1.577	0.093	1.50267	1.944	1.972	1.879	0.092	1.83967	1.741	1.806	1.982
	1 day, 17:30:12	1.546	1.681	1.717	0.093	1.555	1.626	1.635	1.632	0.094	1.537	1.558	1.522	1.664	0.092	1.48933	1.706	1.567	1.883	0.092	1.62667	1.676	1.612	1.56	0.092	1.524	1.972	2.026	1.972	0.091	1.899	1.553	1.817	1.742	0.341	1.61	1.6	1.627	1.558	0.094	1.501	1.941	1.973	1.878	0.092	1.83867	1.741	1.807	1.981
	1 day, 17:45:12	1.546	1.681	1.716	0.093	1.55467	1.629	1.635	1.63	0.094	1.53733	1.555	1.52	1.652	0.092	1.48367	1.705	1.568	1.883	0.092	1.62667	1.673	1.613	1.562	0.092	1.524	1.97	2.025	1.97	0.091	1.89733	1.554	1.816	1.742	0.344	1.61	1.585	1.63	1.622	0.094	1.51833	1.939	1.974	1.876	0.092	1.83767	1.741	1.807	1.981
	1 day, 18:00:12	1.546	1.679	1.716	0.092	1.555	1.629	1.635	1.634	0.094	1.53867	1.553	1.518	1.645	0.092	1.48	1.704	1.568	1.883	0.092	1.62633	1.677	1.615	1.563	0.092	1.52633	1.968	2.023	1.967	0.092	1.894	1.554	1.815	1.742	0.344	1.60967	1.603	1.632	1.556	0.094	1.503	1.935	1.983	1.876	0.092	1.83933	1.74	1.807	1.98
	1 day, 18:15:12	1.546	1.678	1.715	0.093	1.55333	1.631	1.638	1.637	0.094	1.54133	1.55	1.517	1.64	0.092	1.477	1.704	1.569	1.881	0.092	1.626	1.676	1.616	1.561	0.092	1.52567	1.968	2.022	1.965	0.091	1.894	1.554	1.814	1.742	0.346	1.60933	1.599	1.632	1.584	0.094	1.511	1.931	1.982	1.875	0.092	1.83733	1.74	1.808	1.98
	1 day, 18:30:12	1.545	1.677	1.714	0.092	1.55333	1.63	1.638	1.641	0.094	1.54233	1.548	1.515	1.636	0.092	1.47433	1.703	1.57	1.878	0.092	1.625	1.68	1.617	1.563	0.092	1.528	1.966	2.02	1.964	0.091	1.89233	1.555	1.813	1.741	0.349	1.609	1.61	1.639	1.572	0.093	1.514	1.928	1.981	1.873	0.092	1.83533	1.74	1.808	1.978
	1 day, 18:45:12	1.545	1.676	1.713	0.092	1.55267	1.632	1.642	1.642	0.094	1.54467	1.546	1.512	1.633	0.092	1.47167	1.702	1.57	1.876	0.092	1.624	1.677	1.617	1.565	0.092	1.52767	1.964	2.019	1.963	0.091	1.891	1.555	1.813	1.741	0.352	1.609	1.607	1.639	1.609	0.094	1.52433	1.922	1.981	1.872	0.092	1.833	1.739	1.809	1.977
	1 day, 19:00:12	1.546	1.675	1.712	0.093	1.55133	1.633	1.641	1.647	0.094	1.54633	1.544	1.511	1.631	0.092	1.47	1.702	1.57	1.873	0.092	1.623	1.682	1.619	1.565	0.093	1.529	1.964	2.019	1.962	0.092	1.88967	1.556	1.812	1.74	0.355	1.60867	1.613	1.643	1.545	0.093	1.50733	1.919	1.981	1.871	0.092	1.83167	1.739	1.809	1.976
	1 day, 19:15:12	1.545	1.674	1.712	0.093	1.55067	1.634	1.647	1.647	0.094	1.54867	1.542	1.509	1.629	0.092	1.468	1.701	1.571	1.871	0.092	1.62233	1.68	1.62	1.563	0.093	1.528	1.96	2.018	1.961	0.092	1.88767	1.557	1.812	1.741	0.354	1.60933	1.618	1.648	1.551	0.094	1.51167	1.916	1.981	1.871	0.092	1.83067	1.739	1.81	1.974
	1 day, 19:30:12	1.545	1.672	1.711	0.092	1.55067	1.635	1.64	1.647	0.094	1.54667	1.54	1.508	1.628	0.092	1.46667	1.7	1.571	1.87	0.092	1.62167	1.686	1.621	1.566	0.092	1.53233	1.957	2.015	1.959	0.092	1.885	1.557	1.811	1.74	0.358	1.60867	1.619	1.651	1.57	0.093	1.52033	1.911	1.98	1.87	0.092	1.82833	1.738	1.81	1.972
	1 day, 19:45:12	1.545	1.671	1.71	0.093	1.549	1.635	1.647	1.654	0.094	1.55133	1.538	1.506	1.626	0.092	1.46467	1.699	1.571	1.869	0.092	1.621	1.682	1.623	1.566	0.092	1.53167	1.954	2.015	1.958	0.091	1.88467	1.558	1.811	1.74	0.36	1.609	1.619	1.652	1.546	0.093	1.51267	1.908	1.979	1.869	0.092	1.82667	1.738	1.811	1.97
	1 day, 20:00:12	1.545	1.67	1.709	0.093	1.54833	1.638	1.639	1.654	0.094	1.54967	1.536	1.504	1.624	0.092	1.46267	1.698	1.572	1.867	0.092	1.62033	1.686	1.623	1.564	0.092	1.53233	1.952	2.015	1.957	0.091	1.88367	1.557	1.81	1.74	0.359	1.60833	1.625	1.658	1.559	0.093	1.521	1.905	1.978	1.867	0.092	1.82467	1.738	1.811	1.97
	1 day, 20:15:12	1.545	1.669	1.708	0.092	1.54867	1.636	1.641	1.651	0.094	1.54867	1.533	1.502	1.622	0.092	1.46033	1.697	1.572	1.865	0.092	1.61933	1.685	1.624	1.565	0.092	1.53267	1.951	2.013	1.955	0.091	1.882	1.558	1.81	1.739	0.361	1.60833	1.624	1.659	1.538	0.093	1.514	1.9	1.976	1.866	0.092	1.822	1.737	1.811	1.969
	1 day, 20:30:12	1.545	1.668	1.708	0.093	1.54733	1.637	1.637	1.654	0.094	1.54867	1.531	1.5	1.62	0.092	1.45833	1.697	1.572	1.865	0.092	1.61933	1.688	1.625	1.567	0.093	1.53367	1.948	2.011	1.953	0.092	1.87867	1.558	1.81	1.739	0.365	1.60833	1.631	1.676	1.534	0.094	1.51967	1.897	1.976	1.866	0.092	1.821	1.737	1.812	1.969
	1 day, 20:45:12	1.544	1.666	1.706	0.092	1.54667	1.632	1.638	1.649	0.094	1.54567	1.528	1.498	1.619	0.092	1.45633	1.696	1.572	1.864	0.092	1.61867	1.685	1.626	1.567	0.092	1.534	1.945	2.01	1.951	0.091	1.87767	1.558	1.81	1.738	0.368	1.608	1.638	1.677	1.534	0.093	1.52333	1.893	1.978	1.864	0.092	1.81967	1.737	1.812	1.968
	1 day, 21:00:12	1.544	1.666	1.706	0.093	1.54567	1.635	1.631	1.665	0.094	1.54967	1.527	1.496	1.62	0.092	1.45567	1.695	1.573	1.863	0.092	1.61833	1.689	1.627	1.565	0.093	1.534	1.943	2.009	1.949	0.091	1.876	1.559	1.81	1.737	0.37	1.608	1.629	1.695	1.539	0.094	1.527	1.89	1.978	1.864	0.092	1.81867	1.736	1.813	1.967
	1 day, 21:15:12	1.544	1.664	1.705	0.092	1.54567	1.632	1.633	1.656	0.094	1.54633	1.524	1.494	1.618	0.092	1.45333	1.694	1.573	1.862	0.092	1.61767	1.686	1.628	1.567	0.092	1.535	1.94	2.007	1.947	0.091	1.87367	1.559	1.81	1.737	0.372	1.608	1.619	1.687	1.56	0.093	1.529	1.887	1.981	1.863	0.092	1.81833	1.736	1.813	1.967
	1 day, 21:30:12	1.544	1.663	1.704	0.093	1.544	1.632	1.633	1.662	0.094	1.54833	1.522	1.492	1.616	0.092	1.45133	1.692	1.573	1.861	0.092	1.61667	1.691	1.629	1.57	0.093	1.537	1.937	2.007	1.946	0.091	1.87233	1.56	1.81	1.737	0.374	1.60833	1.621	1.691	1.554	0.094	1.528	1.884	1.98	1.862	0.092	1.81667	1.736	1.813	1.966
	1 day, 21:45:12	1.543	1.662	1.703	0.092	1.544	1.629	1.635	1.673	0.094	1.55167	1.52	1.49	1.614	0.092	1.44933	1.692	1.574	1.86	0.092	1.61667	1.687	1.629	1.568	0.092	1.536	1.935	2.006	1.943	0.091	1.87033	1.56	1.809	1.736	0.377	1.60767	1.619	1.707	1.546	0.093	1.531	1.882	1.98	1.86	0.092	1.81533	1.735	1.813	1.965
	1 day, 22:00:12	1.543	1.661	1.702	0.093	1.54233	1.63	1.628	1.676	0.094	1.55067	1.517	1.488	1.612	0.092	1.447	1.69	1.574	1.859	0.092	1.61567	1.692	1.63	1.568	0.092	1.538	1.931	2.005	1.94	0.092	1.86667	1.561	1.81	1.735	0.38	1.608	1.626	1.716	1.54	0.094	1.53333	1.881	1.975	1.859	0.092	1.813	1.735	1.814	1.965
	1 day, 22:15:12	1.543	1.66	1.701	0.092	1.54267	1.627	1.63	1.624	0.094	1.533	1.515	1.486	1.611	0.092	1.44533	1.69	1.574	1.858	0.092	1.61533	1.689	1.63	1.569	0.092	1.53733	1.929	2.004	1.936	0.091	1.86533	1.562	1.809	1.735	0.384	1.608	1.629	1.706	1.547	0.093	1.53433	1.878	1.972	1.857	0.092	1.81033	1.734	1.814	1.964
	1 day, 22:30:12	1.542	1.659	1.7	0.092	1.54167	1.625	1.627	1.624	0.094	1.53133	1.512	1.484	1.609	0.092	1.443	1.688	1.574	1.856	0.092	1.614	1.693	1.63	1.571	0.092	1.53933	1.925	2.004	1.935	0.091	1.86367	1.562	1.808	1.735	0.388	1.60767	1.616	1.72	1.54	0.093	1.53233	1.875	1.971	1.856	0.092	1.80867	1.733	1.814	1.963
	1 day, 22:45:12	1.542	1.657	1.699	0.093	1.53967	1.625	1.623	1.647	0.094	1.53767	1.51	1.481	1.606	0.092	1.44033	1.688	1.575	1.855	0.092	1.614	1.688	1.631	1.571	0.093	1.537	1.922	2.005	1.931	0.091	1.86167	1.563	1.808	1.734	0.387	1.60767	1.632	1.71	1.543	0.093	1.53533	1.873	1.972	1.855	0.092	1.808	1.734	1.815	1.962
	1 day, 23:00:12	1.542	1.656	1.698	0.093	1.539	1.623	1.622	1.625	0.094	1.52933	1.508	1.479	1.605	0.092	1.43867	1.687	1.575	1.854	0.092	1.61333	1.693	1.633	1.57	0.092	1.54	1.916	2.005	1.93	0.091	1.85933	1.563	1.808	1.734	0.393	1.60767	1.633	1.699	1.545	0.093	1.53267	1.87	1.971	1.854	0.092	1.80633	1.733	1.815	1.962
	1 day, 23:15:12	1.542	1.655	1.697	0.092	1.53933	1.623	1.619	1.635	0.093	1.53267	1.506	1.476	1.602	0.092	1.436	1.686	1.575	1.853	0.092	1.61267	1.69	1.634	1.57	0.092	1.53933	1.912	2.007	1.928	0.091	1.858	1.563	1.807	1.733	0.398	1.607	1.637	1.674	1.554	0.093	1.52867	1.869	1.969	1.853	0.092	1.805	1.732	1.815	1.961
	1 day, 23:30:12	1.542	1.654	1.696	0.092	1.53867	1.624	1.618	1.65	0.094	1.53667	1.503	1.474	1.6	0.092	1.43367	1.685	1.576	1.852	0.092	1.61233	1.694	1.633	1.572	0.092	1.541	1.905	2.012	1.926	0.091	1.85667	1.564	1.807	1.733	0.4	1.60733	1.635	1.687	1.539	0.093	1.52733	1.865	1.968	1.853	0.092	1.80333	1.732	1.816	1.96
	1 day, 23:45:12	1.541	1.653	1.696	0.093	1.537	1.624	1.614	1.626	0.094	1.52733	1.501	1.472	1.598	0.092	1.43167	1.684	1.576	1.851	0.092	1.61167	1.69	1.634	1.573	0.093	1.53933	1.901	2.01	1.925	0.092	1.85333	1.564	1.806	1.732	0.402	1.60667	1.628	1.651	1.546	0.094	1.51433	1.863	1.968	1.851	0.092	1.802	1.731	1.816	1.959
	2 days, 0:00:12	1.541	1.652	1.695	0.093	1.53633	1.623	1.613	1.623	0.094	1.52567	1.498	1.469	1.592	0.092	1.42767	1.683	1.577	1.85	0.092	1.61133	1.694	1.634	1.573	0.092	1.54167	1.897	2.009	1.923	0.092	1.851	1.565	1.806	1.731	0.41	1.60667	1.616	1.649	1.539	0.094	1.50733	1.86	1.972	1.85	0.092	1.802	1.731	1.816	1.958
	2 days, 0:15:12	1.54	1.651	1.694	0.092	1.53633	1.624	1.608	1.619	0.094	1.523	1.496	1.466	1.589	0.092	1.425	1.682	1.577	1.849	0.092	1.61067	1.692	1.635	1.571	0.092	1.54067	1.892	2.008	1.922	0.092	1.84867	1.565	1.805	1.73	0.414	1.606	1.612	1.66	1.544	0.093	1.51233	1.857	1.972	1.849	0.092	1.80067	1.73	1.817	1.957
	2 days, 0:30:12	1.54	1.65	1.693	0.092	1.53567	1.623	1.606	1.618	0.093	1.52267	1.494	1.463	1.587	0.092	1.42267	1.681	1.577	1.848	0.092	1.61	1.695	1.635	1.572	0.092	1.542	1.888	2.007	1.92	0.091	1.84733	1.565	1.805	1.73	0.416	1.606	1.592	1.659	1.543	0.093	1.505	1.856	1.972	1.848	0.092	1.8	1.729	1.817	1.956
	2 days, 0:45:12	1.539	1.649	1.692	0.092	1.53467	1.623	1.606	1.613	0.094	1.52	1.491	1.461	1.585	0.092	1.42033	1.679	1.577	1.847	0.092	1.609	1.691	1.635	1.573	0.092	1.541	1.894	2.008	1.919	0.091	1.84933	1.566	1.804	1.729	0.419	1.60567	1.559	1.646	1.537	0.093	1.48767	1.855	1.972	1.847	0.092	1.79933	1.729	1.817	1.955
	2 days, 1:00:12	1.539	1.648	1.691	0.092	1.534	1.623	1.604	1.609	0.094	1.518	1.489	1.458	1.583	0.092	1.418	1.679	1.577	1.846	0.092	1.60867	1.695	1.636	1.574	0.092	1.543	1.895	2.003	1.916	0.091	1.847	1.566	1.804	1.728	0.423	1.60533	1.578	1.662	1.541	0.093	1.50067	1.853	1.973	1.846	0.092	1.79867	1.728	1.818	1.954
	2 days, 1:15:12	1.538	1.647	1.69	0.092	1.533	1.624	1.601	1.612	0.094	1.51833	1.487	1.455	1.581	0.092	1.41567	1.677	1.578	1.846	0.092	1.60833	1.692	1.636	1.575	0.092	1.54233	1.899	2.003	1.914	0.091	1.84767	1.568	1.803	1.728	0.427	1.60567	1.601	1.66	1.541	0.093	1.50767	1.85	1.971	1.845	0.092	1.79667	1.728	1.818	1.954
	2 days, 1:30:12	1.538	1.646	1.689	0.093	1.53133	1.627	1.596	1.598	0.094	1.513	1.485	1.453	1.58	0.092	1.414	1.676	1.579	1.845	0.092	1.608	1.696	1.636	1.575	0.092	1.54367	1.904	1.999	1.912	0.092	1.84633	1.568	1.803	1.728	0.431	1.60567	1.605	1.652	1.549	0.094	1.508	1.849	1.971	1.843	0.092	1.79567	1.728	1.819	1.953
	2 days, 1:45:12	1.537	1.645	1.688	0.092	1.53133	1.628	1.592	1.588	0.094	1.50867	1.482	1.45	1.578	0.092	1.41133	1.675	1.578	1.844	0.092	1.607	1.694	1.637	1.574	0.092	1.543	1.906	1.997	1.91	0.091	1.84667	1.569	1.802	1.727	0.44	1.60533	1.602	1.649	1.542	0.093	1.50467	1.846	1.971	1.842	0.092	1.79433	1.726	1.819	1.952
	2 days, 2:00:12	1.537	1.644	1.688	0.093	1.53	1.631	1.588	1.59	0.094	1.509	1.48	1.447	1.576	0.092	1.409	1.674	1.579	1.843	0.092	1.60667	1.696	1.638	1.573	0.092	1.54367	1.906	1.997	1.908	0.091	1.846	1.57	1.802	1.726	0.442	1.60533	1.626	1.626	1.541	0.094	1.50367	1.844	1.972	1.841	0.092	1.79367	1.726	1.819	1.952
	2 days, 2:15:12	1.537	1.643	1.687	0.093	1.52933	1.632	1.588	1.591	0.094	1.50967	1.477	1.445	1.574	0.092	1.40667	1.673	1.579	1.842	0.092	1.606	1.694	1.638	1.574	0.092	1.54333	1.907	1.996	1.907	0.091	1.84567	1.57	1.801	1.725	0.449	1.60467	1.603	1.634	1.544	0.093	1.50067	1.842	1.972	1.84	0.092	1.79267	1.726	1.819	1.951
	2 days, 2:30:12	1.536	1.642	1.685	0.092	1.529	1.632	1.583	1.591	0.094	1.508	1.475	1.442	1.572	0.092	1.40433	1.672	1.579	1.841	0.092	1.60533	1.697	1.639	1.577	0.092	1.54567	1.908	1.994	1.906	0.091	1.845	1.57	1.801	1.725	0.453	1.60467	1.625	1.636	1.541	0.093	1.50767	1.84	1.971	1.838	0.092	1.791	1.725	1.82	1.95
	2 days, 2:45:12	1.536	1.64	1.685	0.093	1.52733	1.635	1.573	1.593	0.094	1.50633	1.472	1.439	1.569	0.092	1.40133	1.671	1.579	1.84	0.092	1.60467	1.693	1.638	1.577	0.092	1.544	1.908	1.993	1.904	0.091	1.844	1.571	1.8	1.724	0.461	1.60433	1.561	1.644	1.541	0.093	1.489	1.837	1.966	1.837	0.092	1.788	1.724	1.819	1.95
	2 days, 3:00:12	1.536	1.639	1.684	0.092	1.52767	1.635	1.579	1.592	0.094	1.508	1.47	1.436	1.568	0.092	1.39933	1.67	1.58	1.839	0.092	1.60433	1.697	1.639	1.577	0.092	1.54567	1.909	1.991	1.917	0.091	1.848	1.571	1.799	1.724	0.46	1.604	1.54	1.636	1.543	0.093	1.48	1.836	1.963	1.836	0.092	1.78633	1.724	1.82	1.949
	2 days, 3:15:12	1.535	1.638	1.683	0.093	1.52567	1.637	1.579	1.595	0.094	1.50967	1.466	1.433	1.566	0.092	1.39633	1.669	1.58	1.839	0.092	1.604	1.694	1.639	1.577	0.092	1.54467	1.91	1.99	1.917	0.091	1.848	1.571	1.799	1.723	0.467	1.60367	1.552	1.638	1.541	0.093	1.484	1.832	1.962	1.834	0.092	1.784	1.723	1.82	1.948
	2 days, 3:30:12	1.534	1.637	1.682	0.093	1.52467	1.64	1.573	1.596	0.093	1.51	1.464	1.429	1.564	0.092	1.39367	1.668	1.58	1.838	0.092	1.60333	1.696	1.642	1.576	0.092	1.546	1.91	1.987	1.916	0.091	1.84667	1.571	1.798	1.723	0.476	1.60333	1.577	1.647	1.546	0.093	1.497	1.831	1.962	1.833	0.092	1.78333	1.723	1.82	1.948
	2 days, 3:45:12	1.534	1.636	1.681	0.092	1.525	1.641	1.577	1.596	0.093	1.51167	1.461	1.426	1.562	0.092	1.391	1.667	1.581	1.837	0.092	1.603	1.694	1.64	1.575	0.092	1.54433	1.911	1.986	1.915	0.091	1.84633	1.572	1.798	1.722	0.482	1.60333	1.533	1.613	1.543	0.093	1.47	1.829	1.961	1.831	0.092	1.78167	1.722	1.82	1.947
	2 days, 4:00:12	1.533	1.635	1.68	0.093	1.523	1.642	1.577	1.594	0.094	1.51033	1.459	1.423	1.56	0.092	1.38867	1.666	1.581	1.836	0.092	1.60233	1.696	1.641	1.577	0.092	1.546	1.911	1.983	1.915	0.091	1.84533	1.572	1.797	1.721	0.485	1.60267	1.602	1.644	1.544	0.093	1.50367	1.828	1.959	1.83	0.092	1.78033	1.722	1.821	1.946
	2 days, 4:15:12	1.533	1.634	1.679	0.092	1.52333	1.642	1.581	1.599	0.093	1.51433	1.456	1.42	1.558	0.092	1.386	1.665	1.581	1.835	0.092	1.60167	1.695	1.642	1.578	0.092	1.54633	1.909	1.981	1.914	0.091	1.84367	1.573	1.796	1.72	0.491	1.60233	1.549	1.637	1.539	0.093	1.482	1.825	1.958	1.828	0.092	1.77833	1.721	1.821	1.946
	2 days, 4:30:12	1.532	1.633	1.678	0.093	1.52133	1.643	1.582	1.596	0.094	1.513	1.454	1.417	1.556	0.092	1.38367	1.664	1.581	1.835	0.092	1.60133	1.696	1.642	1.579	0.092	1.547	1.91	1.98	1.914	0.091	1.84367	1.574	1.796	1.72	0.491	1.60267	1.522	1.621	1.542	0.094	1.46767	1.822	1.956	1.827	0.092	1.77633	1.721	1.821	1.945
	2 days, 4:45:12	1.531	1.632	1.677	0.092	1.52133	1.643	1.579	1.597	0.093	1.51333	1.451	1.413	1.554	0.092	1.38067	1.663	1.581	1.833	0.092	1.60033	1.696	1.641	1.58	0.092	1.547	1.908	1.976	1.913	0.091	1.84133	1.574	1.795	1.719	0.5	1.602	1.567	1.691	1.548	0.093	1.509	1.819	1.955	1.825	0.092	1.77433	1.72	1.821	1.945
	2 days, 5:00:12	1.531	1.631	1.677	0.092	1.521	1.643	1.584	1.598	0.094	1.51433	1.448	1.411	1.552	0.092	1.37833	1.661	1.582	1.833	0.092	1.6	1.697	1.643	1.58	0.092	1.548	1.908	1.974	1.909	0.091	1.83933	1.575	1.794	1.719	0.502	1.602	1.563	1.67	1.537	0.094	1.496	1.817	1.955	1.824	0.092	1.77333	1.719	1.821	1.944
	2 days, 5:15:12	1.53	1.629	1.676	0.092	1.51967	1.642	1.582	1.592	0.093	1.51233	1.446	1.407	1.549	0.092	1.37533	1.66	1.582	1.832	0.092	1.59933	1.696	1.643	1.579	0.092	1.54733	1.907	1.972	1.907	0.091	1.83767	1.575	1.794	1.718	0.511	1.60167	1.515	1.645	1.541	0.093	1.474	1.815	1.953	1.822	0.092	1.77133	1.719	1.821	1.944
	2 days, 5:30:12	1.53	1.629	1.675	0.093	1.51833	1.641	1.584	1.597	0.093	1.51433	1.443	1.403	1.547	0.092	1.37233	1.66	1.582	1.832	0.092	1.59933	1.698	1.644	1.578	0.092	1.548	1.907	1.971	1.904	0.091	1.83633	1.575	1.793	1.717	0.515	1.601	1.537	1.634	1.55	0.094	1.47967	1.813	1.953	1.82	0.092	1.77	1.719	1.821	1.942
	2 days, 5:45:12	1.529	1.628	1.674	0.093	1.51733	1.637	1.584	1.591	0.094	1.51	1.44	1.4	1.545	0.092	1.36967	1.658	1.582	1.831	0.092	1.59833	1.698	1.643	1.578	0.092	1.54767	1.907	1.968	1.903	0.091	1.835	1.576	1.793	1.716	0.516	1.601	1.557	1.645	1.548	0.093	1.49033	1.811	1.952	1.819	0.092	1.76867	1.718	1.822	1.942
	2 days, 6:00:12	1.528	1.626	1.673	0.092	1.517	1.632	1.582	1.594	0.093	1.50967	1.437	1.396	1.542	0.092	1.36633	1.657	1.581	1.83	0.092	1.59733	1.699	1.644	1.578	0.092	1.54833	1.907	1.966	1.902	0.091	1.834	1.576	1.792	1.716	0.524	1.60067	1.585	1.592	1.545	0.093	1.481	1.808	1.952	1.816	0.092	1.76667	1.718	1.822	1.94
	2 days, 6:15:12	1.527	1.625	1.672	0.093	1.515	1.628	1.584	1.588	0.094	1.506	1.435	1.393	1.54	0.092	1.364	1.656	1.582	1.829	0.092	1.597	1.697	1.645	1.579	0.092	1.54833	1.907	1.964	1.898	0.091	1.832	1.577	1.792	1.715	0.529	1.60067	1.562	1.71	1.542	0.094	1.51067	1.807	1.951	1.815	0.092	1.76567	1.717	1.822	1.939
	2 days, 6:30:12	1.527	1.624	1.671	0.093	1.51433	1.627	1.581	1.59	0.093	1.50633	1.431	1.39	1.536	0.092	1.36033	1.655	1.582	1.829	0.092	1.59667	1.697	1.645	1.581	0.092	1.549	1.906	1.964	1.897	0.091	1.83133	1.577	1.791	1.714	0.532	1.6	1.517	1.577	1.54	0.093	1.45167	1.806	1.95	1.813	0.092	1.76433	1.716	1.822	1.938
	2 days, 6:45:12	1.526	1.623	1.67	0.093	1.51333	1.625	1.582	1.583	0.093	1.50367	1.429	1.386	1.534	0.092	1.35767	1.653	1.583	1.827	0.092	1.59567	1.697	1.645	1.582	0.092	1.54933	1.906	1.96	1.895	0.091	1.82933	1.578	1.791	1.714	0.094	1.60033	1.566	1.675	1.544	0.094	1.501	1.805	1.949	1.811	0.092	1.763	1.716	1.823	1.937
	2 days, 7:00:12	1.525	1.622	1.669	0.093	1.51233	1.623	1.577	1.583	0.094	1.50033	1.425	1.383	1.531	0.092	1.35433	1.653	1.583	1.827	0.092	1.59567	1.697	1.646	1.582	0.092	1.54967	1.905	1.958	1.893	0.091	1.82767	1.577	1.79	1.713	0.094	1.59933	1.56	1.609	1.544	0.093	1.478	1.803	1.948	1.809	0.092	1.76133	1.716	1.822	1.936
	2 days, 7:15:12	1.524	1.621	1.669	0.092	1.51267	1.622	1.575	1.579	0.093	1.499	1.422	1.379	1.529	0.092	1.35133	1.651	1.583	1.826	0.092	1.59467	1.698	1.646	1.583	0.092	1.55033	1.904	1.956	1.891	0.091	1.826	1.579	1.789	1.712	0.094	1.59933	1.543	1.648	1.543	0.093	1.485	1.801	1.948	1.807	0.092	1.76	1.714	1.822	1.935
	2 days, 7:30:12	1.524	1.62	1.668	0.092	1.512	1.622	1.573	1.574	0.093	1.49667	1.42	1.376	1.526	0.092	1.34867	1.65	1.583	1.825	0.092	1.594	1.699	1.646	1.581	0.092	1.55	1.903	1.954	1.889	0.091	1.82433	1.579	1.788	1.712	0.094	1.599	1.515	1.615	1.54	0.093	1.46367	1.799	1.947	1.805	0.092	1.75833	1.714	1.822	1.935
	2 days, 7:45:12	1.523	1.619	1.667	0.092	1.511	1.623	1.569	1.574	0.093	1.49567	1.417	1.372	1.524	0.092	1.34567	1.649	1.584	1.825	0.092	1.594	1.7	1.648	1.58	0.092	1.55067	1.902	1.951	1.887	0.091	1.82233	1.579	1.787	1.711	0.094	1.59833	1.57	1.685	1.545	0.093	1.507	1.798	1.945	1.803	0.092	1.75667	1.713	1.823	1.934
	2 days, 8:00:12	1.522	1.617	1.666	0.093	1.50867	1.625	1.566	1.574	0.093	1.49533	1.414	1.368	1.522	0.092	1.34267	1.648	1.584	1.824	0.092	1.59333	1.699	1.649	1.579	0.092	1.55033	1.902	1.949	1.886	0.091	1.82133	1.579	1.787	1.71	0.094	1.598	1.534	1.623	1.544	0.094	1.473	1.796	1.944	1.8	0.092	1.75467	1.713	1.823	1.933
	2 days, 8:15:12	1.522	1.617	1.665	0.092	1.50933	1.627	1.564	1.573	0.093	1.495	1.412	1.364	1.519	0.092	1.33967	1.647	1.584	1.824	0.092	1.593	1.7	1.649	1.579	0.092	1.55067	1.901	1.946	1.882	0.091	1.81867	1.58	1.786	1.71	0.094	1.598	1.579	1.628	1.575	0.094	1.5	1.794	1.942	1.798	0.092	1.75267	1.712	1.823	1.932
	2 days, 8:30:12	1.521	1.615	1.664	0.092	1.508	1.628	1.556	1.574	0.093	1.493	1.409	1.361	1.517	0.092	1.337	1.646	1.584	1.823	0.092	1.59233	1.7	1.649	1.58	0.092	1.551	1.901	1.944	1.88	0.091	1.81733	1.58	1.786	1.709	0.094	1.59767	1.556	1.627	1.545	0.093	1.483	1.794	1.941	1.796	0.092	1.75167	1.712	1.822	1.931
	2 days, 8:45:12	1.521	1.614	1.664	0.092	1.50767	1.637	1.554	1.577	0.093	1.49633	1.406	1.356	1.515	0.091	1.33467	1.645	1.584	1.823	0.092	1.592	1.7	1.648	1.582	0.092	1.55133	1.901	1.941	1.879	0.091	1.816	1.58	1.785	1.708	0.094	1.597	1.546	1.661	1.545	0.093	1.491	1.793	1.94	1.794	0.092	1.75033	1.711	1.823	1.931
	2 days, 9:00:12	1.52	1.613	1.663	0.093	1.50567	1.649	1.554	1.587	0.093	1.50367	1.404	1.352	1.513	0.092	1.331	1.644	1.585	1.823	0.092	1.592	1.7	1.649	1.583	0.092	1.552	1.9	1.937	1.877	0.091	1.81367	1.581	1.784	1.708	0.094	1.597	1.558	1.638	1.547	0.094	1.487	1.793	1.938	1.792	0.092	1.749	1.711	1.823	1.93
	2 days, 9:15:12	1.52	1.612	1.662	0.093	1.505	1.659	1.554	1.593	0.094	1.508	1.401	1.349	1.51	0.092	1.328	1.643	1.585	1.822	0.092	1.59133	1.701	1.65	1.583	0.092	1.55267	1.9	1.935	1.877	0.091	1.813	1.582	1.784	1.707	0.094	1.597	1.563	1.7	1.569	0.094	1.51667	1.792	1.937	1.79	0.092	1.74767	1.71	1.823	1.93
	2 days, 9:30:12	1.518	1.611	1.661	0.092	1.50467	1.672	1.554	1.6	0.093	1.51567	1.398	1.344	1.508	0.092	1.32467	1.642	1.585	1.822	0.092	1.591	1.7	1.649	1.581	0.092	1.55133	1.899	1.933	1.874	0.091	1.811	1.582	1.783	1.706	0.094	1.59633	1.598	1.657	1.549	0.093	1.50833	1.791	1.935	1.787	0.092	1.74567	1.709	1.823	1.929
	2 days, 9:45:12	1.518	1.61	1.661	0.092	1.50433	1.681	1.56	1.608	0.093	1.52333	1.395	1.341	1.506	0.092	1.322	1.641	1.586	1.821	0.092	1.59067	1.701	1.651	1.579	0.092	1.55167	1.899	1.929	1.871	0.091	1.80867	1.582	1.783	1.705	0.094	1.596	1.579	1.678	1.544	0.093	1.50733	1.79	1.934	1.785	0.092	1.74433	1.709	1.823	1.928
	2 days, 10:00:12	1.517	1.608	1.66	0.092	1.503	1.69	1.566	1.633	0.094	1.53567	1.393	1.336	1.504	0.092	1.319	1.64	1.585	1.821	0.092	1.59	1.702	1.65	1.578	0.093	1.55033	1.897	1.927	1.87	0.091	1.807	1.583	1.782	1.704	0.094	1.59567	1.555	1.652	1.543	0.093	1.49033	1.789	1.933	1.782	0.092	1.74267	1.708	1.823	1.927
	2 days, 10:15:12	1.516	1.608	1.659	0.093	1.50133	1.699	1.569	1.63	0.094	1.53867	1.39	1.333	1.501	0.092	1.316	1.639	1.586	1.821	0.092	1.59	1.702	1.653	1.581	0.092	1.55333	1.897	1.924	1.869	0.091	1.80567	1.583	1.782	1.704	0.094	1.59567	1.523	1.661	1.543	0.094	1.48167	1.788	1.932	1.78	0.092	1.74133	1.708	1.823	1.926
	2 days, 10:30:12	1.515	1.606	1.658	0.093	1.5	1.705	1.582	1.658	0.094	1.55433	1.388	1.329	1.498	0.092	1.313	1.638	1.586	1.82	0.092	1.58933	1.702	1.654	1.582	0.092	1.554	1.896	1.92	1.869	0.091	1.804	1.583	1.781	1.703	0.094	1.595	1.57	1.663	1.543	0.094	1.498	1.787	1.931	1.778	0.092	1.74	1.706	1.823	1.926
	2 days, 10:45:12	1.514	1.605	1.657	0.092	1.5	1.711	1.605	1.658	0.094	1.564	1.385	1.325	1.496	0.092	1.31	1.637	1.586	1.819	0.092	1.58867	1.703	1.655	1.577	0.092	1.553	1.895	1.919	1.868	0.091	1.803	1.583	1.78	1.702	0.094	1.59433	1.528	1.719	1.556	0.093	1.508	1.786	1.928	1.775	0.092	1.73767	1.706	1.823	1.925
	2 days, 11:00:12	1.513	1.604	1.656	0.092	1.499	1.72	1.632	1.697	0.094	1.589	1.382	1.322	1.493	0.092	1.307	1.635	1.586	1.819	0.092	1.588	1.703	1.655	1.577	0.092	1.553	1.894	1.916	1.866	0.091	1.801	1.583	1.78	1.701	0.094	1.594	1.615	1.697	1.547	0.094	1.52567	1.786	1.926	1.773	0.092	1.73633	1.706	1.823	1.924
	2 days, 11:15:12	1.513	1.603	1.655	0.093	1.49733	1.731	1.62	1.706	0.094	1.59167	1.38	1.318	1.491	0.092	1.30433	1.635	1.586	1.818	0.092	1.58767	1.705	1.655	1.577	0.092	1.55367	1.893	1.913	1.864	0.091	1.799	1.583	1.779	1.701	0.094	1.59367	1.595	1.716	1.552	0.094	1.527	1.784	1.923	1.771	0.092	1.734	1.705	1.823	1.923
	2 days, 11:30:12	1.512	1.602	1.654	0.093	1.49633	1.728	1.659	1.696	0.093	1.60133	1.377	1.315	1.488	0.092	1.30133	1.633	1.586	1.817	0.092	1.58667	1.704	1.654	1.571	0.092	1.551	1.892	1.912	1.862	0.091	1.79767	1.584	1.778	1.7	0.094	1.59333	1.613	1.722	1.581	0.093	1.54567	1.784	1.92	1.768	0.092	1.732	1.704	1.823	1.922
	2 days, 11:45:12	1.511	1.601	1.653	0.092	1.49633	1.734	1.678	1.723	0.093	1.61867	1.375	1.312	1.486	0.091	1.3	1.632	1.586	1.817	0.092	1.58633	1.704	1.656	1.575	0.092	1.553	1.891	1.908	1.86	0.091	1.79533	1.584	1.777	1.7	0.094	1.593	1.58	1.705	1.56	0.093	1.522	1.782	1.917	1.766	0.092	1.72967	1.703	1.823	1.921
	2 days, 12:00:12	1.51	1.6	1.652	0.092	1.49533	1.735	1.687	1.707	0.093	1.61667	1.372	1.308	1.484	0.092	1.296	1.631	1.586	1.816	0.092	1.58567	1.702	1.655	1.571	0.092	1.55067	1.889	1.907	1.859	0.091	1.794	1.584	1.777	1.699	0.094	1.59267	1.568	1.735	1.547	0.093	1.52367	1.781	1.914	1.764	0.092	1.72767	1.703	1.823	1.921
	2 days, 12:15:12	1.509	1.599	1.651	0.092	1.49433	1.736	1.696	1.714	0.093	1.62233	1.37	1.305	1.481	0.091	1.29433	1.631	1.587	1.815	0.092	1.58567	1.703	1.655	1.569	0.092	1.55033	1.889	1.902	1.856	0.091	1.79133	1.584	1.776	1.698	0.094	1.592	1.573	1.748	1.551	0.093	1.531	1.78	1.911	1.762	0.092	1.72567	1.702	1.823	1.92
	2 days, 12:30:12	1.508	1.597	1.65	0.092	1.493	1.734	1.695	1.715	0.093	1.62167	1.368	1.302	1.479	0.092	1.291	1.63	1.587	1.815	0.092	1.58533	1.704	1.655	1.571	0.092	1.55133	1.888	1.879	1.854	0.091	1.78267	1.586	1.775	1.698	0.094	1.59233	1.574	1.75	1.557	0.093	1.534	1.779	1.909	1.759	0.092	1.72367	1.701	1.823	1.919
	2 days, 12:45:12	1.508	1.597	1.649	0.093	1.49167	1.732	1.698	1.694	0.093	1.615	1.365	1.298	1.477	0.091	1.289	1.628	1.587	1.814	0.092	1.58433	1.707	1.654	1.571	0.092	1.552	1.887	1.863	1.853	0.091	1.77667	1.586	1.774	1.697	0.094	1.59167	1.555	1.747	1.553	0.093	1.52533	1.778	1.906	1.757	0.092	1.72167	1.7	1.823	1.919
	2 days, 13:00:12	1.507	1.596	1.648	0.092	1.49167	1.733	1.698	1.706	0.094	1.61833	1.363	1.295	1.475	0.092	1.28567	1.627	1.587	1.813	0.092	1.58367	1.708	1.655	1.571	0.092	1.55267	1.887	1.855	1.85	0.091	1.773	1.586	1.774	1.696	0.094	1.59133	1.59	1.754	1.547	0.094	1.53633	1.777	1.904	1.755	0.092	1.72	1.699	1.822	1.918
	2 days, 13:15:12	1.507	1.595	1.647	0.093	1.49	1.74	1.706	1.713	0.093	1.62667	1.361	1.292	1.472	0.092	1.283	1.626	1.587	1.813	0.092	1.58333	1.708	1.653	1.569	0.093	1.55033	1.885	1.845	1.852	0.091	1.76967	1.587	1.773	1.695	0.094	1.591	1.577	1.766	1.549	0.093	1.53767	1.776	1.9	1.753	0.092	1.71767	1.698	1.822	1.917
	2 days, 13:30:12	1.505	1.593	1.646	0.092	1.48933	1.744	1.7	1.707	0.093	1.624	1.359	1.289	1.47	0.091	1.28167	1.625	1.587	1.812	0.092	1.58267	1.707	1.654	1.57	0.092	1.55167	1.884	1.838	1.853	0.091	1.76733	1.587	1.773	1.695	0.094	1.591	1.571	1.765	1.55	0.094	1.53467	1.775	1.898	1.75	0.092	1.71567	1.697	1.822	1.916
	2 days, 13:45:12	1.504	1.592	1.645	0.093	1.48733	1.742	1.707	1.716	0.093	1.62867	1.357	1.285	1.468	0.091	1.279	1.624	1.587	1.811	0.092	1.582	1.706	1.653	1.57	0.092	1.551	1.883	1.833	1.851	0.091	1.76467	1.587	1.772	1.694	0.094	1.59033	1.599	1.728	1.549	0.093	1.53233	1.774	1.895	1.748	0.092	1.71367	1.696	1.822	1.915
	2 days, 14:00:12	1.502	1.591	1.644	0.092	1.487	1.743	1.699	1.692	0.093	1.61833	1.354	1.282	1.465	0.091	1.276	1.622	1.587	1.81	0.092	1.581	1.705	1.655	1.566	0.092	1.55	1.882	1.831	1.849	0.091	1.763	1.587	1.771	1.694	0.094	1.59	1.553	1.741	1.551	0.093	1.522	1.773	1.891	1.746	0.092	1.71133	1.696	1.822	1.914
	2 days, 14:15:12	1.502	1.591	1.643	0.093	1.48567	1.743	1.708	1.714	0.094	1.62767	1.352	1.279	1.462	0.092	1.27233	1.622	1.587	1.81	0.092	1.581	1.704	1.655	1.566	0.093	1.54867	1.881	1.826	1.849	0.091	1.761	1.588	1.77	1.693	0.094	1.58967	1.562	1.731	1.545	0.094	1.51867	1.771	1.887	1.744	0.092	1.70867	1.695	1.822	1.913
	2 days, 14:30:12	1.5	1.589	1.642	0.092	1.485	1.744	1.703	1.7	0.093	1.62267	1.35	1.276	1.46	0.091	1.271	1.62	1.588	1.809	0.092	1.58033	1.706	1.654	1.564	0.093	1.54833	1.879	1.819	1.848	0.091	1.75767	1.589	1.77	1.692	0.094	1.58967	1.539	1.741	1.546	0.093	1.51567	1.77	1.884	1.742	0.092	1.70667	1.694	1.822	1.912
	2 days, 14:45:12	1.499	1.588	1.641	0.093	1.483	1.744	1.706	1.716	0.093	1.629	1.348	1.272	1.457	0.091	1.268	1.619	1.588	1.809	0.092	1.58	1.704	1.654	1.57	0.092	1.55067	1.878	1.815	1.847	0.091	1.75567	1.589	1.769	1.691	0.094	1.589	1.544	1.734	1.556	0.093	1.51833	1.769	1.88	1.739	0.092	1.704	1.693	1.821	1.911
	2 days, 15:00:12	1.498	1.587	1.64	0.093	1.482	1.744	1.705	1.695	0.093	1.62167	1.346	1.269	1.455	0.091	1.26567	1.618	1.587	1.808	0.092	1.579	1.703	1.655	1.563	0.092	1.54833	1.877	1.811	1.845	0.091	1.75333	1.589	1.769	1.691	0.094	1.589	1.557	1.74	1.55	0.093	1.52267	1.768	1.877	1.738	0.092	1.70233	1.693	1.821	1.91
	2 days, 15:15:12	1.496	1.586	1.639	0.092	1.48167	1.743	1.705	1.71	0.093	1.62633	1.344	1.266	1.452	0.091	1.263	1.617	1.588	1.807	0.092	1.57867	1.702	1.656	1.577	0.092	1.553	1.876	1.808	1.843	0.091	1.75133	1.59	1.768	1.69	0.094	1.58867	1.576	1.724	1.551	0.093	1.524	1.766	1.873	1.735	0.092	1.69933	1.692	1.821	1.909
	2 days, 15:30:12	1.495	1.584	1.638	0.092	1.48033	1.748	1.704	1.694	0.093	1.62233	1.342	1.263	1.45	0.091	1.26067	1.615	1.588	1.806	0.092	1.57767	1.703	1.656	1.569	0.092	1.55067	1.875	1.803	1.842	0.091	1.749	1.59	1.768	1.689	0.094	1.58833	1.596	1.738	1.552	0.093	1.53567	1.765	1.869	1.733	0.092	1.697	1.691	1.821	1.908
	2 days, 15:45:12	1.494	1.583	1.637	0.093	1.47833	1.749	1.701	1.713	0.093	1.628	1.34	1.26	1.448	0.091	1.25833	1.614	1.588	1.806	0.092	1.57733	1.703	1.656	1.591	0.092	1.558	1.873	1.799	1.841	0.091	1.74667	1.59	1.767	1.689	0.094	1.588	1.541	1.706	1.552	0.093	1.50667	1.764	1.864	1.73	0.092	1.694	1.69	1.821	1.907
	2 days, 16:00:12	1.493	1.582	1.636	0.093	1.47733	1.749	1.7	1.699	0.094	1.622	1.338	1.257	1.446	0.091	1.256	1.613	1.588	1.805	0.092	1.57667	1.703	1.657	1.623	0.093	1.568	1.872	1.794	1.841	0.091	1.74467	1.591	1.767	1.688	0.094	1.588	1.546	1.745	1.552	0.094	1.52033	1.763	1.859	1.728	0.092	1.69133	1.689	1.821	1.906
	2 days, 16:15:12	1.492	1.58	1.635	0.092	1.477	1.751	1.706	1.71	0.093	1.62933	1.336	1.253	1.443	0.091	1.253	1.612	1.587	1.804	0.092	1.57567	1.701	1.658	1.671	0.092	1.58467	1.871	1.791	1.839	0.091	1.74267	1.591	1.766	1.688	0.094	1.58767	1.56	1.714	1.552	0.093	1.51567	1.761	1.856	1.726	0.092	1.689	1.689	1.82	1.905
	2 days, 16:30:12	1.491	1.579	1.634	0.092	1.476	1.75	1.701	1.694	0.093	1.622	1.334	1.25	1.441	0.091	1.25067	1.611	1.587	1.803	0.092	1.575	1.703	1.656	1.728	0.092	1.60367	1.87	1.786	1.837	0.091	1.74	1.592	1.766	1.687	0.094	1.58767	1.54	1.731	1.575	0.093	1.52233	1.76	1.852	1.724	0.092	1.68667	1.688	1.82	1.905
	2 days, 16:45:12	1.49	1.577	1.633	0.093	1.47367	1.748	1.704	1.706	0.093	1.62633	1.332	1.248	1.439	0.091	1.24867	1.61	1.587	1.802	0.092	1.57433	1.701	1.657	1.818	0.092	1.63333	1.869	1.779	1.836	0.091	1.737	1.593	1.765	1.686	0.094	1.58733	1.556	1.698	1.556	0.094	1.50933	1.759	1.849	1.721	0.092	1.68433	1.687	1.82	1.904
	2 days, 17:00:12	1.489	1.577	1.632	0.093	1.473	1.748	1.702	1.694	0.093	1.62167	1.33	1.244	1.436	0.091	1.24567	1.608	1.588	1.802	0.092	1.574	1.701	1.656	2	0.093	1.69267	1.868	1.773	1.835	0.091	1.73433	1.593	1.764	1.686	0.094	1.587	1.631	1.754	1.557	0.093	1.55433	1.758	1.846	1.72	0.092	1.68267	1.686	1.82	1.903
	2 days, 17:15:12	1.489	1.575	1.631	0.092	1.473	1.748	1.707	1.71	0.093	1.62867	1.328	1.241	1.434	0.091	1.24333	1.607	1.587	1.8	0.092	1.57267	1.702	1.66	2.102	0.092	1.72933	1.867	1.765	1.833	0.091	1.73067	1.593	1.764	1.685	0.094	1.58667	1.544	1.729	1.56	0.093	1.518	1.757	1.843	1.717	0.092	1.68033	1.684	1.819	1.902
	2 days, 17:30:12	1.488	1.575	1.63	0.092	1.47233	1.748	1.702	1.69	0.093	1.62033	1.327	1.238	1.431	0.091	1.241	1.606	1.587	1.799	0.092	1.572	1.704	1.661	2.251	0.092	1.78	1.865	1.76	1.831	0.091	1.72767	1.593	1.763	1.684	0.094	1.586	1.539	1.759	1.557	0.093	1.52533	1.756	1.839	1.715	0.092	1.678	1.684	1.819	1.901
	2 days, 17:45:12	1.487	1.572	1.629	0.093	1.46967	1.749	1.706	1.712	0.094	1.62833	1.325	1.235	1.429	0.091	1.23867	1.605	1.588	1.798	0.092	1.57167	1.706	1.668	2.329	0.093	1.808	1.864	1.756	1.83	0.091	1.72567	1.594	1.763	1.683	0.094	1.586	1.547	1.741	1.559	0.094	1.52167	1.755	1.836	1.713	0.092	1.676	1.683	1.819	1.9
	2 days, 18:00:12	1.485	1.572	1.628	0.092	1.46967	1.746	1.702	1.694	0.093	1.621	1.323	1.232	1.427	0.091	1.23633	1.603	1.588	1.798	0.092	1.571	1.704	1.674	2.355	0.092	1.819	1.863	1.754	1.829	0.091	1.72433	1.593	1.762	1.682	0.094	1.585	1.592	1.771	1.564	0.093	1.54933	1.754	1.833	1.711	0.092	1.674	1.683	1.819	1.899
	2 days, 18:15:12	1.484	1.57	1.627	0.092	1.46833	1.75	1.712	1.71	0.093	1.631	1.321	1.23	1.425	0.091	1.23433	1.602	1.588	1.796	0.092	1.57	1.704	1.69	2.425	0.092	1.84767	1.862	1.751	1.827	0.091	1.72233	1.594	1.761	1.682	0.094	1.585	1.554	1.738	1.547	0.093	1.52	1.753	1.83	1.709	0.092	1.672	1.681	1.819	1.898
	2 days, 18:30:12	1.483	1.569	1.626	0.092	1.46733	1.748	1.703	1.691	0.093	1.621	1.319	1.227	1.422	0.091	1.23167	1.601	1.588	1.795	0.092	1.56933	1.707	1.715	2.55	0.092	1.89867	1.861	1.748	1.825	0.091	1.72033	1.594	1.761	1.681	0.094	1.58467	1.606	1.764	1.547	0.093	1.546	1.752	1.826	1.707	0.092	1.66967	1.681	1.818	1.897
	2 days, 18:45:12	1.482	1.568	1.625	0.093	1.46533	1.748	1.711	1.707	0.093	1.629	1.317	1.224	1.42	0.091	1.22933	1.6	1.588	1.794	0.092	1.56867	1.705	1.747	2.505	0.092	1.89367	1.859	1.745	1.823	0.091	1.718	1.594	1.76	1.681	0.094	1.58433	1.568	1.748	1.553	0.093	1.53	1.751	1.823	1.704	0.092	1.66733	1.68	1.818	1.896
	2 days, 19:00:12	1.481	1.567	1.623	0.092	1.465	1.75	1.704	1.688	0.093	1.621	1.316	1.221	1.417	0.091	1.227	1.599	1.588	1.794	0.092	1.56833	1.707	1.792	2.533	0.092	1.91867	1.858	1.74	1.821	0.091	1.71533	1.595	1.76	1.679	0.094	1.584	1.612	1.766	1.567	0.093	1.55533	1.751	1.819	1.702	0.092	1.66533	1.679	1.818	1.895
	2 days, 19:15:12	1.48	1.566	1.622	0.092	1.464	1.75	1.714	1.704	0.093	1.62967	1.314	1.218	1.415	0.091	1.22467	1.597	1.588	1.792	0.092	1.567	1.708	1.847	2.571	0.092	1.95	1.856	1.735	1.82	0.091	1.71267	1.595	1.759	1.679	0.094	1.58367	1.64	1.754	1.605	0.093	1.57333	1.75	1.815	1.7	0.092	1.663	1.679	1.817	1.894
	2 days, 19:30:12	1.479	1.564	1.621	0.092	1.46267	1.748	1.702	1.687	0.093	1.61933	1.313	1.215	1.413	0.091	1.22267	1.596	1.589	1.792	0.092	1.567	1.709	1.93	2.577	0.092	1.98	1.855	1.728	1.817	0.091	1.709	1.595	1.758	1.678	0.094	1.583	1.57	1.776	1.563	0.093	1.54333	1.749	1.813	1.698	0.092	1.66133	1.678	1.817	1.893
	2 days, 19:45:12	1.478	1.563	1.62	0.093	1.46067	1.746	1.71	1.706	0.093	1.62767	1.312	1.212	1.411	0.091	1.22067	1.595	1.588	1.791	0.092	1.566	1.707	1.985	2.534	0.092	1.98333	1.853	1.723	1.816	0.091	1.70633	1.596	1.758	1.678	0.094	1.58333	1.568	1.754	1.55	0.093	1.531	1.748	1.81	1.696	0.092	1.65933	1.677	1.817	1.892
	2 days, 20:00:12	1.477	1.561	1.619	0.092	1.46033	1.743	1.706	1.686	0.093	1.61867	1.31	1.21	1.409	0.091	1.21867	1.593	1.589	1.79	0.092	1.56533	1.71	2.093	2.63	0.092	2.05233	1.851	1.72	1.815	0.091	1.70433	1.596	1.757	1.677	0.094	1.58267	1.586	1.776	1.549	0.093	1.544	1.746	1.806	1.694	0.092	1.65667	1.676	1.817	1.891
	2 days, 20:15:12	1.476	1.56	1.618	0.092	1.45933	1.738	1.71	1.704	0.093	1.62433	1.309	1.207	1.406	0.091	1.21633	1.592	1.588	1.789	0.092	1.56433	1.708	2.19	2.61	0.092	2.07733	1.846	1.719	1.812	0.091	1.70133	1.597	1.756	1.676	0.094	1.58233	1.589	1.746	1.561	0.093	1.539	1.746	1.802	1.692	0.092	1.65467	1.675	1.816	1.89
	2 days, 20:30:12	1.475	1.559	1.617	0.093	1.45733	1.743	1.706	1.685	0.093	1.61833	1.307	1.204	1.404	0.091	1.214	1.591	1.588	1.788	0.092	1.56367	1.709	2.3	2.595	0.092	2.10933	1.845	1.719	1.811	0.091	1.70067	1.597	1.756	1.676	0.094	1.58233	1.602	1.754	1.554	0.093	1.54367	1.745	1.799	1.69	0.092	1.65267	1.674	1.816	1.889
	2 days, 20:45:12	1.475	1.558	1.616	0.093	1.45667	1.745	1.705	1.703	0.093	1.62467	1.306	1.201	1.402	0.091	1.212	1.589	1.588	1.787	0.092	1.56267	1.71	2.401	2.627	0.093	2.153	1.843	1.717	1.809	0.091	1.69867	1.597	1.755	1.675	0.094	1.58167	1.616	1.762	1.561	0.093	1.55333	1.744	1.796	1.688	0.092	1.65067	1.674	1.816	1.887
	2 days, 21:00:12	1.474	1.557	1.615	0.092	1.45667	1.741	1.705	1.683	0.093	1.61667	1.305	1.199	1.4	0.091	1.21033	1.588	1.588	1.786	0.092	1.562	1.712	2.507	2.588	0.092	2.177	1.842	1.715	1.808	0.091	1.69733	1.598	1.754	1.674	0.094	1.58133	1.617	1.757	1.62	0.094	1.57067	1.742	1.793	1.686	0.092	1.64833	1.673	1.816	1.887
	2 days, 21:15:12	1.473	1.556	1.614	0.093	1.45467	1.742	1.706	1.699	0.093	1.62267	1.303	1.196	1.398	0.091	1.208	1.587	1.588	1.786	0.092	1.56167	1.713	2.564	2.52	0.092	2.17367	1.841	1.712	1.806	0.091	1.69533	1.598	1.754	1.673	0.094	1.581	1.601	1.753	1.557	0.094	1.543	1.742	1.791	1.684	0.092	1.647	1.671	1.815	1.886
	2 days, 21:30:12	1.471	1.555	1.613	0.092	1.45433	1.746	1.706	1.68	0.093	1.61767	1.301	1.194	1.396	0.091	1.206	1.586	1.588	1.784	0.092	1.56067	1.712	2.661	2.467	0.092	2.188	1.841	1.71	1.803	0.091	1.69367	1.598	1.753	1.673	0.094	1.58067	1.636	1.759	1.551	0.093	1.55567	1.74	1.788	1.681	0.092	1.64433	1.671	1.815	1.885
	00:00:00
	00:00:00
	00:00:00
	00:00:00
	00:00:00
	00:00:00
	00:00:00
	00:00:00
	00:00:00
	00:00:00
Results
		2	3	4	5		6	7	8	9		10	11	12
	A	3.483	3.431	-0.01	4.061		3.964	3.097	0.011	3.009		8.045	3.133	-0.005	Max V [600]
		1	1	0.907	0.999		0.965	1	0.639	1		0.997	1	0.889	R-Squared [600]
		07:15:12	07:00:12	00:30:12	18:45:12		18:45:12	07:15:12	00:30:12	1 day, 1:45:12		1 day, 4:00:12	22:45:12	1 day, 19:45:12	t at Max V [600]
		04:48:30	04:42:06	?????	14:03:38		14:10:59	04:44:43	?????	19:46:33		1 day, 2:09:33	17:02:34	1 day, 18:41:27	Lagtime [600]
	B	3.325	3.43	-0.019	-3.304		6.932	8.867	-0.009	4.299		4.121	4.225	-0.007	Max V [600]
		1	1	0.694	0.989		1	0.991	0.86	1		1	0.989	0.781	R-Squared [600]
		07:15:12	07:00:12	00:30:12	22:00:12		2 days, 20:30:12	2 days, 17:00:12	00:30:12	21:30:12		21:45:12	21:30:12	00:30:12	t at Max V [600]
		04:34:17	04:25:34	?????	1 day, 5:41:06		2 days, 15:16:58	2 days, 14:12:02	?????	16:22:28		16:31:19	17:59:46	?????	Lagtime [600]
	C	3.086	3.429	-8.721	3.315		3.253	3.625	-0.01	3.971		3.493	4.216	0.005	Max V [600]
		1	1	0.749	1		1	1	0.987	1		1	0.918	0.942	R-Squared [600]
		07:00:12	07:00:12	2 days, 6:45:12	06:45:12		06:45:12	06:30:12	00:30:12	18:45:12		1 day, 0:00:12	18:15:12	2 days, 13:00:12	t at Max V [600]
		04:25:48	04:28:37	2 days, 6:46:43	04:26:13		04:26:35	04:23:07	?????	12:53:15		17:23:05	14:49:46	2 days, 14:55:55	Lagtime [600]
	D	3.505	3.259	-0.005	3.352		3.151	3.023	-0.006	3.216		3.219	3.269	-0.013	Max V [600]
		1	1	0.942	1		1	1	0.675	1		1	1	0.97	R-Squared [600]
		07:15:12	07:00:12	2 days, 0:15:12	07:15:12		07:00:12	07:30:12	1 day, 2:00:12	07:30:12		07:30:12	07:00:12	00:30:12	t at Max V [600]
		04:50:12	04:43:40	1 day, 22:19:29	04:48:16		04:39:17	04:35:09	1 day, 1:10:12	04:44:05		04:41:46	04:40:25	00:01:47	Lagtime [600]
	E	3.454	3.472	-0.165	-0.007		-0.007	0.005	0.005	-0.006		0.005	-0.005	-0.009	Max V [600]
		0.994	1	0.492	0.758		0.926	0.942	0.696	0.88		0.817	0.942	0.845	R-Squared [600]
		1 day, 5:00:12	23:15:12	01:15:12	00:30:12		00:30:12	00:30:12	2 days, 1:30:12	00:30:12		1 day, 14:45:12	03:15:12	00:30:12	t at Max V [600]
		21:40:44	16:55:36	01:30:01	?????		?????	?????	2 days, 1:37:42	?????		1 day, 15:28:03	02:23:46	?????	Lagtime [600]
	F	3.347	3.988	-0.006	-0.006		0.005	-0.01	0.005	-0.005		-0.005	-0.004	-0.005	Max V [600]
		1	1	0.92	0.88		0.696	0.893	0.696	0.696		0.721	0.9	0.8	R-Squared [600]
		1 day, 0:30:12	20:00:12	11:15:12	00:30:12		18:00:12	00:30:12	22:15:12	03:15:12		1 day, 2:00:12	1 day, 19:45:12	03:15:12	t at Max V [600]
		17:35:00	14:47:43	10:05:12	?????		19:07:42	?????	23:00:12	03:03:57		1 day, 1:21:38	1 day, 19:20:12	02:37:42	Lagtime [600]
	G	3.973	3.196	-0.005	-0.005		-0.005	0.005	0.005	-0.005		-0.005	0.005	0.005	Max V [600]
		0.998	0.991	0.8	0.817		0.942	0.889	0.727	0.593		0.941	0.696	0.8	R-Squared [600]
		17:15:12	16:00:12	00:30:12	2 days, 6:00:12		10:00:12	2 days, 7:45:12	1 day, 3:00:12	00:30:12		10:00:12	2 days, 1:00:12	20:30:12	t at Max V [600]
		12:24:12	10:19:34	?????	2 days, 6:43:03		08:21:38	2 days, 8:30:12	1 day, 3:33:57	?????		09:18:57	2 days, 1:45:12	21:07:42	Lagtime [600]
	H	3.596	3.408	-0.01	-0.006		0.007	-0.007	0.005	-0.005		-0.005	0.006	-0.006	Max V [600]
		1	1	0.893	0.723		0.417	0.893	0.696	0.8		0.817	0.92	0.75	R-Squared [600]
		07:15:12	07:15:12	00:30:12	00:30:12		00:30:12	00:30:12	2 days, 1:00:12	1 day, 2:00:12		1 day, 15:15:12	04:15:12	00:30:12	t at Max V [600]
		04:48:58	04:37:27	?????	?????		?????	?????	2 days, 1:30:12	1 day, 2:00:12		1 day, 15:15:12	04:28:32	?????	Lagtime [600]
[truncated: 32 more columns]
