# Supplementary material for: Bacterial–fungal interactions in the neonatal gut influence asthma outcomes later in life
Source: eLife. 2021 Apr 20;10:e67740. doi: 10.7554/eLife.67740 (PMC8075585; doi:10.7554/eLife.67740)
Supplement: Figure 4—source data 5. [file elife-67740-fig4-data5.xlsx]

## Sheet: Plate 1 - Sheet1
Software Version	3.05.11
Experiment File Path:	C:\Users\Plate Reader\Documents\Roz\Pichia_scfa_equalconc_062919.xlsx
Protocol File Path:	C:\Users\Plate Reader\Documents\Roz\Pichia_GC.prt
Plate Number	Plate 1
Date	2019-06-28
Time	08:01:22
Reader Type:	Synergy H1
Reader Serial Number:	1905217
Reading Type	Reader
Procedure Details
Plate Type	96 WELL PLATE (Use plate lid)
Eject plate on completion
Set Temperature	Setpoint 37°C
	Preheat before moving to next step
Start Kinetic	Runtime 72:00:00 (HH:MM:SS), Interval 0:15:00, 289 Reads
Shake	Orbital: 0:10 (MM:SS)
	Frequency: 282 cpm (3 mm)
Read	Absorbance Endpoint
	Full Plate
	Wavelengths: 600
	Read Speed: Normal, Delay: 100 msec, Measurements/Data Point: 8
End Kinetic
600
	Time	T° 600	A1	A2	A3	A4	A5	A6	A7	A8	A9	A10	A11	A12	B1	B2	B3	B4	B5	B6	B7	B8	B9	B10	B11	B12	C1	C2	C3	C4	C5	C6	C7	C8	C9	C10	C11	C12	D1	D2	D3	D4	D5	D6	D7	D8	D9	D10	D11
	00:00:12	37	0.125	0.128	0.129	0.093	0.129	0.129	0.127	0.095	0.129	0.128	0.126	0.093	0.127	0.13	0.218	0.092	0.13	0.128	0.13	0.093	0.127	0.129	0.126	0.092	0.13	0.137	0.145	0.096	0.13	0.127	0.129	0.096	0.13	0.131	0.132	0.094	0.127	0.133	0.132	0.096	0.145	0.131	0.129	0.096	0.132	0.129	0.132
	00:15:12	37	0.129	0.131	0.133	0.092	0.13	0.13	0.13	0.095	0.132	0.13	0.13	0.093	0.13	0.133	0.21	0.092	0.133	0.131	0.133	0.093	0.13	0.132	0.129	0.091	0.135	0.141	0.147	0.096	0.134	0.131	0.134	0.096	0.134	0.135	0.132	0.093	0.125	0.129	0.136	0.096	0.147	0.126	0.126	0.096	0.131	0.129	0.13
	00:30:12	37	0.128	0.13	0.13	0.092	0.128	0.131	0.129	0.094	0.13	0.129	0.129	0.093	0.128	0.134	0.216	0.091	0.132	0.129	0.132	0.093	0.13	0.13	0.13	0.091	0.133	0.134	0.15	0.095	0.135	0.131	0.134	0.096	0.133	0.137	0.136	0.093	0.129	0.135	0.133	0.095	0.154	0.131	0.129	0.095	0.131	0.13	0.126
	00:45:12	37	0.129	0.129	0.13	0.092	0.129	0.131	0.13	0.094	0.131	0.129	0.129	0.093	0.126	0.135	0.219	0.091	0.132	0.129	0.133	0.092	0.13	0.131	0.13	0.091	0.126	0.134	0.152	0.095	0.135	0.133	0.134	0.096	0.134	0.138	0.136	0.093	0.138	0.136	0.132	0.095	0.161	0.133	0.134	0.095	0.134	0.133	0.132
	01:00:12	37	0.129	0.13	0.132	0.092	0.13	0.132	0.13	0.094	0.132	0.13	0.131	0.093	0.127	0.136	0.222	0.091	0.133	0.13	0.134	0.092	0.13	0.131	0.131	0.091	0.126	0.134	0.153	0.095	0.136	0.134	0.134	0.096	0.135	0.14	0.138	0.093	0.137	0.128	0.128	0.095	0.163	0.131	0.128	0.095	0.133	0.131	0.133
	01:15:12	37	0.131	0.132	0.134	0.092	0.13	0.132	0.131	0.095	0.132	0.131	0.131	0.093	0.128	0.138	0.223	0.091	0.135	0.131	0.135	0.092	0.131	0.133	0.132	0.091	0.127	0.135	0.154	0.095	0.137	0.134	0.135	0.096	0.136	0.141	0.139	0.093	0.137	0.128	0.128	0.095	0.167	0.13	0.129	0.095	0.132	0.131	0.133
	01:30:12	37	0.132	0.134	0.134	0.092	0.132	0.134	0.133	0.094	0.134	0.132	0.132	0.093	0.132	0.138	0.223	0.091	0.136	0.132	0.135	0.092	0.131	0.133	0.132	0.091	0.127	0.135	0.155	0.095	0.138	0.135	0.136	0.096	0.137	0.141	0.14	0.093	0.138	0.129	0.13	0.095	0.166	0.131	0.131	0.095	0.132	0.133	0.134
	01:45:12	37	0.134	0.135	0.136	0.092	0.133	0.136	0.134	0.094	0.134	0.133	0.132	0.093	0.134	0.14	0.223	0.091	0.137	0.133	0.137	0.092	0.133	0.134	0.133	0.091	0.129	0.137	0.156	0.095	0.138	0.137	0.137	0.096	0.138	0.143	0.141	0.093	0.138	0.132	0.132	0.095	0.167	0.132	0.132	0.095	0.133	0.134	0.136
	02:00:12	37	0.135	0.137	0.138	0.092	0.136	0.138	0.137	0.094	0.135	0.134	0.133	0.093	0.135	0.141	0.224	0.091	0.139	0.136	0.14	0.092	0.135	0.135	0.134	0.091	0.13	0.138	0.158	0.095	0.141	0.139	0.139	0.096	0.14	0.144	0.142	0.093	0.141	0.134	0.133	0.095	0.168	0.134	0.134	0.095	0.136	0.136	0.137
	02:15:12	37.1	0.138	0.14	0.14	0.092	0.138	0.141	0.139	0.094	0.136	0.135	0.135	0.093	0.138	0.143	0.225	0.091	0.142	0.138	0.143	0.092	0.136	0.137	0.136	0.091	0.133	0.141	0.16	0.095	0.143	0.142	0.142	0.096	0.143	0.147	0.145	0.093	0.143	0.136	0.135	0.095	0.171	0.136	0.136	0.095	0.138	0.139	0.139
	02:30:12	37	0.142	0.143	0.143	0.092	0.141	0.144	0.142	0.094	0.138	0.136	0.136	0.093	0.141	0.147	0.229	0.091	0.145	0.142	0.146	0.092	0.139	0.139	0.139	0.091	0.135	0.144	0.164	0.096	0.147	0.146	0.145	0.096	0.146	0.15	0.148	0.093	0.147	0.14	0.138	0.095	0.175	0.139	0.139	0.095	0.142	0.141	0.142
	02:45:12	37.1	0.146	0.147	0.147	0.092	0.145	0.148	0.146	0.094	0.139	0.138	0.137	0.093	0.145	0.15	0.231	0.091	0.149	0.145	0.15	0.092	0.141	0.141	0.141	0.091	0.139	0.148	0.168	0.095	0.151	0.15	0.15	0.096	0.149	0.153	0.151	0.093	0.15	0.143	0.142	0.095	0.179	0.143	0.143	0.095	0.146	0.146	0.146
	03:00:12	37	0.151	0.152	0.152	0.092	0.149	0.153	0.151	0.094	0.141	0.139	0.139	0.093	0.15	0.155	0.235	0.091	0.154	0.151	0.156	0.092	0.145	0.144	0.145	0.091	0.143	0.154	0.173	0.095	0.157	0.156	0.155	0.096	0.153	0.158	0.155	0.093	0.155	0.147	0.146	0.095	0.187	0.148	0.148	0.095	0.15	0.151	0.15
	03:15:12	37	0.157	0.157	0.158	0.092	0.155	0.159	0.157	0.094	0.142	0.141	0.141	0.093	0.157	0.161	0.242	0.091	0.161	0.157	0.162	0.092	0.148	0.148	0.149	0.091	0.149	0.16	0.18	0.095	0.163	0.162	0.161	0.096	0.159	0.163	0.159	0.093	0.161	0.153	0.152	0.095	0.194	0.153	0.153	0.095	0.156	0.156	0.156
	03:30:12	37	0.165	0.164	0.165	0.092	0.162	0.166	0.164	0.094	0.144	0.144	0.143	0.093	0.164	0.168	0.249	0.091	0.169	0.164	0.17	0.092	0.153	0.151	0.154	0.091	0.155	0.167	0.188	0.095	0.171	0.17	0.169	0.096	0.165	0.17	0.165	0.093	0.168	0.16	0.158	0.095	0.204	0.16	0.16	0.095	0.162	0.163	0.162
	03:45:12	37	0.174	0.173	0.173	0.092	0.17	0.175	0.173	0.094	0.147	0.146	0.145	0.093	0.173	0.176	0.258	0.091	0.178	0.173	0.179	0.092	0.159	0.156	0.16	0.091	0.163	0.176	0.197	0.095	0.181	0.18	0.178	0.096	0.172	0.177	0.172	0.093	0.177	0.168	0.166	0.095	0.216	0.169	0.169	0.095	0.171	0.172	0.17
	04:00:12	37.1	0.185	0.183	0.184	0.092	0.18	0.185	0.183	0.094	0.15	0.149	0.148	0.093	0.184	0.186	0.271	0.091	0.189	0.183	0.19	0.092	0.165	0.162	0.167	0.091	0.173	0.188	0.209	0.095	0.193	0.192	0.189	0.096	0.181	0.185	0.18	0.093	0.188	0.178	0.176	0.095	0.23	0.179	0.179	0.095	0.181	0.182	0.179
	04:15:12	37	0.198	0.195	0.196	0.092	0.191	0.197	0.194	0.094	0.153	0.152	0.151	0.093	0.197	0.199	0.284	0.091	0.202	0.196	0.203	0.092	0.172	0.169	0.174	0.091	0.185	0.2	0.222	0.095	0.206	0.205	0.203	0.096	0.19	0.195	0.19	0.093	0.2	0.189	0.187	0.095	0.246	0.191	0.192	0.095	0.192	0.194	0.19
	04:30:12	37	0.213	0.21	0.211	0.092	0.205	0.211	0.208	0.094	0.157	0.156	0.155	0.093	0.212	0.214	0.298	0.091	0.217	0.21	0.218	0.092	0.18	0.177	0.183	0.091	0.199	0.215	0.238	0.095	0.222	0.222	0.219	0.096	0.201	0.208	0.201	0.093	0.214	0.203	0.199	0.095	0.265	0.204	0.206	0.095	0.206	0.208	0.203
	04:45:12	37	0.232	0.226	0.227	0.092	0.221	0.228	0.224	0.094	0.161	0.16	0.16	0.093	0.23	0.23	0.318	0.091	0.235	0.227	0.236	0.092	0.189	0.186	0.193	0.091	0.214	0.232	0.256	0.095	0.241	0.241	0.237	0.096	0.215	0.22	0.215	0.093	0.23	0.219	0.215	0.095	0.287	0.221	0.223	0.095	0.223	0.226	0.219
	05:00:12	37	0.253	0.246	0.246	0.092	0.239	0.247	0.242	0.094	0.167	0.165	0.164	0.093	0.251	0.25	0.339	0.091	0.256	0.247	0.257	0.092	0.201	0.196	0.205	0.091	0.233	0.252	0.276	0.096	0.263	0.263	0.258	0.096	0.229	0.236	0.23	0.093	0.249	0.237	0.232	0.095	0.313	0.239	0.241	0.095	0.242	0.245	0.237
	05:15:12	37	0.278	0.269	0.269	0.092	0.26	0.269	0.264	0.094	0.172	0.17	0.17	0.093	0.275	0.273	0.365	0.091	0.28	0.271	0.282	0.092	0.212	0.207	0.217	0.091	0.254	0.275	0.299	0.095	0.288	0.288	0.282	0.096	0.245	0.252	0.246	0.093	0.272	0.258	0.252	0.095	0.341	0.261	0.263	0.095	0.264	0.268	0.258
	05:30:12	37	0.306	0.294	0.295	0.092	0.284	0.295	0.289	0.094	0.178	0.177	0.176	0.093	0.302	0.299	0.392	0.091	0.307	0.297	0.31	0.092	0.225	0.219	0.231	0.091	0.279	0.301	0.327	0.095	0.317	0.316	0.309	0.096	0.265	0.27	0.264	0.093	0.298	0.283	0.274	0.095	0.373	0.286	0.288	0.095	0.288	0.293	0.283
	05:45:12	37	0.339	0.324	0.324	0.092	0.312	0.324	0.317	0.094	0.185	0.184	0.183	0.093	0.333	0.33	0.424	0.091	0.338	0.328	0.341	0.092	0.24	0.233	0.247	0.091	0.308	0.331	0.357	0.095	0.349	0.349	0.341	0.096	0.285	0.291	0.285	0.093	0.326	0.309	0.3	0.095	0.409	0.314	0.318	0.095	0.318	0.322	0.311
	06:00:12	37	0.376	0.358	0.356	0.092	0.342	0.357	0.349	0.094	0.193	0.192	0.19	0.093	0.369	0.362	0.459	0.091	0.373	0.362	0.376	0.092	0.255	0.249	0.263	0.091	0.34	0.363	0.39	0.095	0.385	0.386	0.377	0.096	0.307	0.315	0.309	0.093	0.359	0.339	0.329	0.095	0.447	0.346	0.35	0.095	0.351	0.355	0.343
	06:15:12	37	0.417	0.396	0.394	0.092	0.377	0.394	0.385	0.094	0.202	0.2	0.199	0.093	0.409	0.398	0.496	0.091	0.411	0.399	0.415	0.092	0.273	0.266	0.28	0.091	0.376	0.398	0.425	0.095	0.425	0.427	0.416	0.096	0.332	0.34	0.335	0.093	0.395	0.373	0.361	0.095	0.488	0.381	0.385	0.095	0.386	0.391	0.379
	06:30:12	37	0.461	0.434	0.434	0.092	0.414	0.433	0.423	0.094	0.212	0.21	0.208	0.093	0.453	0.44	0.536	0.091	0.453	0.44	0.457	0.092	0.292	0.285	0.3	0.091	0.418	0.439	0.465	0.095	0.47	0.471	0.458	0.096	0.359	0.367	0.362	0.093	0.433	0.41	0.395	0.095	0.532	0.419	0.424	0.095	0.424	0.43	0.418
	06:45:12	37	0.507	0.478	0.478	0.092	0.457	0.477	0.465	0.094	0.222	0.22	0.218	0.093	0.498	0.485	0.578	0.091	0.498	0.483	0.504	0.092	0.312	0.306	0.321	0.091	0.461	0.48	0.504	0.095	0.517	0.518	0.505	0.096	0.389	0.396	0.393	0.093	0.477	0.453	0.433	0.095	0.577	0.46	0.467	0.095	0.468	0.473	0.46
	07:00:12	37	0.558	0.525	0.526	0.092	0.501	0.524	0.509	0.094	0.232	0.231	0.23	0.093	0.548	0.535	0.619	0.091	0.544	0.528	0.551	0.092	0.333	0.328	0.345	0.091	0.508	0.524	0.545	0.095	0.566	0.567	0.551	0.096	0.417	0.427	0.424	0.093	0.523	0.499	0.474	0.095	0.626	0.505	0.513	0.095	0.513	0.517	0.506
	07:15:12	37	0.609	0.574	0.575	0.092	0.546	0.57	0.558	0.094	0.244	0.243	0.241	0.093	0.598	0.586	0.665	0.091	0.59	0.572	0.593	0.092	0.356	0.351	0.369	0.091	0.56	0.572	0.59	0.095	0.616	0.617	0.599	0.096	0.451	0.461	0.459	0.093	0.575	0.549	0.52	0.095	0.677	0.553	0.561	0.095	0.562	0.567	0.559
	07:30:12	37	0.663	0.628	0.625	0.092	0.59	0.617	0.606	0.094	0.257	0.255	0.254	0.093	0.652	0.638	0.711	0.091	0.637	0.617	0.634	0.092	0.38	0.377	0.393	0.091	0.612	0.622	0.636	0.095	0.653	0.664	0.644	0.096	0.482	0.495	0.494	0.093	0.636	0.598	0.569	0.095	0.727	0.604	0.613	0.095	0.613	0.618	0.614
	07:45:12	37	0.715	0.677	0.677	0.092	0.632	0.66	0.651	0.094	0.271	0.269	0.268	0.093	0.706	0.692	0.758	0.091	0.68	0.664	0.677	0.092	0.406	0.401	0.419	0.091	0.669	0.673	0.682	0.095	0.697	0.71	0.689	0.096	0.516	0.529	0.529	0.093	0.632	0.651	0.617	0.095	0.774	0.655	0.665	0.095	0.667	0.669	0.67
	08:00:12	37	0.759	0.726	0.727	0.092	0.673	0.699	0.698	0.094	0.284	0.282	0.282	0.093	0.759	0.734	0.802	0.091	0.721	0.703	0.721	0.092	0.433	0.427	0.446	0.091	0.725	0.721	0.727	0.095	0.739	0.756	0.733	0.096	0.551	0.564	0.566	0.093	0.678	0.705	0.664	0.095	0.821	0.708	0.714	0.095	0.719	0.719	0.73
	08:15:12	37	0.803	0.772	0.774	0.092	0.71	0.741	0.741	0.094	0.298	0.297	0.296	0.093	0.807	0.776	0.837	0.091	0.762	0.744	0.758	0.092	0.461	0.455	0.473	0.091	0.778	0.769	0.771	0.095	0.778	0.801	0.776	0.096	0.584	0.6	0.601	0.093	0.726	0.755	0.71	0.095	0.866	0.757	0.765	0.095	0.77	0.763	0.781
	08:30:12	37	0.844	0.812	0.815	0.092	0.75	0.781	0.782	0.094	0.315	0.313	0.313	0.093	0.854	0.82	0.873	0.091	0.804	0.782	0.794	0.092	0.488	0.484	0.502	0.091	0.825	0.813	0.813	0.095	0.819	0.841	0.812	0.096	0.618	0.634	0.639	0.093	0.77	0.805	0.755	0.095	0.912	0.806	0.812	0.095	0.818	0.811	0.835
	08:45:12	37	0.884	0.857	0.835	0.092	0.79	0.819	0.824	0.094	0.331	0.329	0.329	0.093	0.895	0.864	0.904	0.091	0.844	0.818	0.831	0.092	0.517	0.514	0.528	0.091	0.871	0.857	0.854	0.095	0.859	0.877	0.848	0.096	0.651	0.667	0.673	0.093	0.814	0.845	0.798	0.095	0.966	0.853	0.855	0.095	0.865	0.858	0.887
	09:00:12	37.1	0.921	0.898	0.881	0.092	0.827	0.856	0.861	0.094	0.349	0.346	0.347	0.093	0.937	0.906	0.937	0.091	0.883	0.857	0.866	0.092	0.543	0.542	0.556	0.091	0.916	0.852	0.891	0.095	0.894	0.911	0.885	0.096	0.684	0.698	0.706	0.093	0.857	0.887	0.843	0.095	0.934	0.897	0.9	0.095	0.91	0.902	0.931
	09:15:12	37	0.96	0.939	0.923	0.092	0.864	0.894	0.9	0.094	0.366	0.363	0.364	0.093	0.977	0.949	0.97	0.091	0.918	0.864	0.903	0.092	0.57	0.571	0.564	0.091	0.963	0.894	0.927	0.095	0.928	0.943	0.923	0.096	0.714	0.729	0.738	0.093	0.898	0.933	0.882	0.095	0.973	0.94	0.94	0.095	0.953	0.942	0.975
	09:30:12	37.1	0.996	0.978	0.957	0.092	0.896	0.933	0.935	0.094	0.384	0.381	0.383	0.093	1.016	1.004	1.002	0.091	0.952	0.9	0.936	0.092	0.595	0.596	0.591	0.091	1.005	0.931	0.962	0.095	0.965	0.978	0.956	0.096	0.743	0.757	0.766	0.093	0.94	0.977	0.924	0.095	1.008	0.982	0.985	0.095	0.994	0.982	1.017
	09:45:12	37	1.029	1.015	0.998	0.092	0.927	0.962	0.969	0.094	0.401	0.399	0.402	0.093	1.054	1.027	1.032	0.091	0.984	0.933	0.967	0.092	0.617	0.624	0.616	0.091	1.047	0.966	0.994	0.095	0.955	1.012	0.987	0.096	0.767	0.785	0.794	0.093	0.982	1.018	0.962	0.095	1.043	1.021	1.026	0.095	1.029	1.022	1.057
	10:00:12	37	1.065	1.049	1.039	0.092	0.959	0.992	1.001	0.094	0.418	0.418	0.42	0.093	1.092	1.067	1.061	0.091	1.013	0.966	0.997	0.092	0.638	0.648	0.637	0.091	1.085	1.004	1.029	0.095	0.996	1.04	1.016	0.096	0.791	0.809	0.818	0.093	1.019	1.055	0.999	0.095	1.067	1.059	1.063	0.095	1.065	1.058	1.099
	10:15:12	37.1	1.098	1.077	1.075	0.092	0.989	1.021	1.027	0.094	0.435	0.436	0.438	0.093	1.128	1.104	1.089	0.091	1.041	0.996	1.026	0.092	0.658	0.673	0.656	0.091	1.121	1.039	1.046	0.095	1.018	1.069	1.043	0.096	0.814	0.832	0.84	0.093	1.06	1.09	1.034	0.095	1.106	1.098	1.101	0.095	1.099	1.094	1.136
	10:30:12	36.9	1.132	1.106	1.111	0.092	0.92	1.047	1.055	0.094	0.455	0.453	0.457	0.093	1.161	1.139	1.1	0.091	1.066	1.026	1.051	0.092	0.68	0.694	0.677	0.091	1.155	1.072	1.069	0.095	1.045	1.095	1.069	0.095	0.833	0.854	0.861	0.093	1.097	1.123	1.069	0.095	1.138	1.131	1.134	0.095	1.13	1.126	1.17
	10:45:12	37	1.158	1.139	1.144	0.092	0.945	1.072	1.081	0.094	0.466	0.47	0.475	0.093	1.19	1.171	1.18	0.091	1.093	1.052	1.076	0.092	0.698	0.717	0.695	0.091	1.187	1.102	1.102	0.095	1.071	1.121	1.093	0.096	0.853	0.873	0.878	0.093	1.134	1.153	1.104	0.095	1.167	1.164	1.164	0.095	1.16	1.156	1.201
	11:00:12	37	1.198	1.173	1.175	0.092	0.97	1.095	1.102	0.094	0.483	0.488	0.494	0.093	1.217	1.202	1.254	0.091	1.117	1.078	1.098	0.092	0.713	0.735	0.711	0.091	1.217	1.132	1.155	0.095	1.094	1.139	1.118	0.095	0.868	0.891	0.893	0.093	1.17	1.181	1.133	0.095	1.197	1.194	1.198	0.095	1.183	1.185	1.234
	11:15:12	37.1	1.225	1.203	1.201	0.092	0.991	1.111	1.114	0.094	0.498	0.505	0.509	0.093	1.243	1.23	1.284	0.091	1.139	1.099	1.121	0.092	0.73	0.75	0.726	0.091	1.247	1.16	1.191	0.095	1.115	1.156	1.138	0.095	0.88	0.906	0.901	0.093	1.203	1.209	1.163	0.095	1.225	1.222	1.226	0.095	1.194	1.213	1.263
	11:30:12	37	1.251	1.232	1.229	0.092	0.998	1.121	1.117	0.094	0.514	0.52	0.525	0.093	1.263	1.262	1.314	0.091	1.157	1.12	1.139	0.092	0.738	0.763	0.734	0.091	1.275	1.186	0.97	0.095	1.138	1.172	1.157	0.095	0.887	0.906	0.738	0.093	1.232	1.235	1.19	0.095	1.251	1.248	1.252	0.095	1.26	1.239	1.286
	11:45:12	37	1.277	1.259	1.256	0.092	1.002	1.124	1.12	0.094	0.528	0.537	0.54	0.093	1.276	1.287	1.339	0.091	1.171	1.131	1.149	0.092	0.746	0.771	0.74	0.091	1.3	1.211	1.001	0.095	1.153	1.176	1.171	0.095	0.892	0.911	0.745	0.093	1.258	1.255	1.215	0.095	1.275	1.274	1.278	0.095	1.397	1.262	1.311
	12:00:12	37	1.297	1.285	1.282	0.092	1.002	1.125	1.119	0.094	0.543	0.551	0.556	0.093	1.314	1.312	1.356	0.091	1.178	1.136	1.153	0.092	0.75	0.778	0.745	0.091	1.321	1.236	1.029	0.095	1.164	1.194	1.18	0.096	0.897	0.916	0.752	0.093	1.28	1.278	1.242	0.095	1.299	1.296	1.298	0.095	1.438	1.285	1.329
	12:15:12	37	1.313	1.305	1.303	0.092	1.001	1.125	1.115	0.094	0.556	0.566	0.571	0.093	1.397	1.334	1.378	0.091	1.182	1.139	1.154	0.092	0.755	0.781	0.747	0.091	1.336	1.257	1.053	0.095	1.171	1.252	1.183	0.096	0.902	0.919	0.756	0.093	1.282	1.295	1.264	0.095	1.318	1.316	1.307	0.095	1.451	1.3	1.342
	12:30:12	37	1.328	1.322	1.32	0.092	1.005	1.127	1.116	0.094	0.569	0.579	0.585	0.094	1.466	1.354	1.394	0.091	1.182	1.141	1.156	0.092	0.757	0.785	0.754	0.092	1.349	1.276	1.077	0.095	1.176	1.335	1.187	0.096	0.904	0.922	0.76	0.093	1.296	1.304	1.282	0.095	1.332	1.328	1.306	0.095	1.476	1.314	1.351
	12:45:12	37.1	1.339	1.336	1.335	0.092	1.007	1.126	1.117	0.094	0.582	0.592	0.597	0.093	1.452	1.366	1.407	0.091	1.184	1.141	1.155	0.092	0.761	0.788	0.756	0.091	1.359	1.289	1.1	0.095	1.18	1.369	1.186	0.096	0.906	0.925	0.765	0.093	1.399	1.301	1.295	0.095	1.343	1.336	1.339	0.095	1.499	1.324	1.361
	13:00:12	37	1.351	1.348	1.348	0.092	1.012	1.13	1.121	0.094	0.591	0.604	0.608	0.093	1.449	1.376	1.419	0.091	1.186	1.143	1.156	0.092	0.763	0.794	0.761	0.091	1.37	1.302	1.113	0.095	1.183	1.355	1.189	0.096	0.907	0.926	0.769	0.093	1.486	1.321	1.304	0.095	1.352	1.338	1.429	0.095	1.526	1.333	1.365
	13:15:12	37	1.359	1.361	1.361	0.092	1.021	1.134	1.127	0.094	0.601	0.614	0.617	0.093	1.458	1.387	1.429	0.091	1.188	1.146	1.159	0.092	0.768	0.796	0.764	0.092	1.379	1.313	1.129	0.095	1.185	1.356	1.192	0.096	0.91	0.928	0.772	0.093	1.482	1.402	1.31	0.095	1.353	1.333	1.5	0.095	1.561	1.34	1.362
	13:30:12	37	1.365	1.369	1.372	0.092	1.029	1.141	1.134	0.094	0.609	0.623	0.624	0.093	1.481	1.396	1.437	0.091	1.192	1.15	1.161	0.092	0.769	0.802	0.764	0.092	1.383	1.324	1.13	0.095	1.183	1.371	1.196	0.095	0.913	0.932	0.776	0.093	1.498	1.487	1.304	0.095	1.348	1.379	1.488	0.095	1.603	1.348	1.355
	13:45:12	37	1.367	1.377	1.379	0.092	1.034	1.147	1.14	0.094	0.614	0.63	0.629	0.093	1.479	1.402	1.445	0.091	1.197	1.155	1.165	0.092	0.771	0.809	0.767	0.091	1.381	1.334	1.193	0.095	1.184	1.395	1.202	0.095	0.916	0.934	0.779	0.093	1.526	1.484	1.311	0.095	1.394	1.476	1.492	0.095	1.646	1.349	1.395
	14:00:12	37	1.363	1.381	1.385	0.092	1.041	1.153	1.144	0.094	0.62	0.636	0.634	0.093	1.493	1.407	1.451	0.091	1.202	1.16	1.171	0.092	0.774	0.819	0.77	0.091	1.371	1.341	1.328	0.095	1.218	1.432	1.252	0.095	0.92	0.938	0.783	0.093	1.556	1.492	1.386	0.095	1.49	1.513	1.506	0.095	1.696	1.34	1.482
	14:15:12	37	1.354	1.383	1.388	0.092	1.046	1.159	1.146	0.094	0.624	0.643	0.64	0.093	1.513	1.408	1.455	0.091	1.206	1.165	1.176	0.092	0.776	0.833	0.774	0.091	1.391	1.346	1.339	0.095	1.282	1.477	1.207	0.095	0.923	0.943	0.788	0.093	1.591	1.508	1.482	0.095	1.535	1.494	1.528	0.095	1.741	1.354	1.543
	14:30:12	37	1.369	1.379	1.39	0.092	1.051	1.166	1.141	0.094	0.628	0.649	0.642	0.093	1.54	1.403	1.459	0.091	1.208	1.169	1.181	0.092	0.781	0.852	0.779	0.091	1.458	1.35	1.34	0.095	1.349	1.524	1.212	0.095	0.928	0.947	0.791	0.093	1.629	1.54	1.488	0.095	1.52	1.496	1.553	0.095	1.78	1.436	1.54
	14:45:12	37	1.427	1.371	1.391	0.092	1.054	1.172	1.14	0.094	0.632	0.658	0.647	0.093	1.572	1.397	1.462	0.091	1.207	1.173	1.183	0.092	0.784	0.877	0.783	0.091	1.512	1.352	1.353	0.095	1.353	1.57	1.213	0.095	0.932	0.952	0.797	0.093	1.667	1.701	1.486	0.095	1.524	1.512	1.582	0.095	1.813	1.501	1.545
	15:00:12	37	1.48	1.389	1.391	0.092	1.058	1.175	1.197	0.094	0.636	0.666	0.65	0.093	1.604	1.417	1.462	0.091	1.203	1.175	1.187	0.092	0.784	0.907	0.786	0.091	1.496	1.353	1.373	0.095	1.359	1.613	1.212	0.095	0.936	0.957	0.798	0.093	1.704	1.693	1.494	0.095	1.538	1.537	1.613	0.095	1.841	1.481	1.559
	15:15:12	36.9	1.475	1.435	1.392	0.092	1.059	1.177	1.303	0.094	0.638	0.675	0.654	0.093	1.631	1.462	1.458	0.091	1.215	1.175	1.185	0.092	0.779	0.946	0.79	0.091	1.492	1.351	1.401	0.095	1.378	1.649	1.207	0.095	0.939	0.961	0.803	0.093	1.737	1.698	1.508	0.095	1.559	1.566	1.647	0.095	1.863	1.488	1.58
	15:30:12	37	1.458	1.48	1.392	0.092	1.06	1.176	1.333	0.094	0.642	0.687	0.657	0.093	1.654	1.512	1.453	0.091	1.265	1.166	1.178	0.093	0.805	0.987	0.793	0.091	1.495	1.348	1.436	0.095	1.402	1.68	1.206	0.096	0.943	0.965	0.805	0.093	1.769	1.684	1.528	0.095	1.587	1.598	1.683	0.095	1.881	1.506	1.607
	15:45:12	37	1.454	1.487	1.392	0.092	1.054	1.165	1.318	0.094	0.645	0.7	0.66	0.093	1.672	1.524	1.461	0.091	1.353	1.157	1.183	0.092	0.903	1.02	0.795	0.092	1.498	1.354	1.472	0.095	1.429	1.703	1.228	0.095	0.944	0.968	0.808	0.093	1.8	1.689	1.555	0.095	1.618	1.634	1.716	0.095	1.898	1.525	1.638
	16:00:12	37	1.458	1.472	1.39	0.092	1.042	1.174	1.326	0.094	0.648	0.716	0.665	0.093	1.685	1.511	1.49	0.091	1.428	1.173	1.233	0.092	1.009	1.027	0.791	0.091	1.504	1.382	1.507	0.095	1.463	1.716	1.279	0.095	0.94	0.971	0.811	0.093	1.831	1.724	1.586	0.095	1.653	1.671	1.748	0.095	1.914	1.548	1.671
	16:15:12	37	1.466	1.464	1.389	0.092	1.047	1.234	1.345	0.094	0.65	0.732	0.667	0.093	1.696	1.508	1.523	0.091	1.447	1.229	1.336	0.093	1.043	1.017	0.79	0.091	1.518	1.429	1.539	0.095	1.504	1.723	1.346	0.095	0.929	0.972	0.81	0.093	1.859	1.765	1.621	0.095	1.687	1.709	1.778	0.095	1.928	1.576	1.702
	16:30:12	37	1.476	1.464	1.385	0.092	1.093	1.304	1.369	0.094	0.652	0.749	0.67	0.093	1.708	1.51	1.544	0.091	1.454	1.309	1.447	0.092	1.058	1.012	0.855	0.092	1.536	1.484	1.569	0.095	1.548	1.73	1.405	0.095	0.917	0.974	0.81	0.093	1.885	1.796	1.658	0.095	1.72	1.747	1.806	0.095	1.94	1.607	1.733
	16:45:12	37	1.49	1.467	1.378	0.092	1.159	1.333	1.399	0.094	0.653	0.763	0.673	0.093	1.719	1.52	1.553	0.091	1.47	1.399	1.473	0.093	1.079	1.012	0.96	0.092	1.558	1.505	1.597	0.095	1.592	1.736	1.438	0.095	0.927	0.976	0.804	0.093	1.906	1.828	1.696	0.095	1.75	1.782	1.83	0.095	1.952	1.64	1.761
	17:00:12	37	1.508	1.473	1.376	0.092	1.222	1.337	1.435	0.094	0.654	0.77	0.675	0.093	1.73	1.533	1.557	0.091	1.498	1.464	1.471	0.092	1.104	1.011	1.016	0.092	1.584	1.494	1.621	0.095	1.634	1.749	1.469	0.095	0.991	0.977	0.823	0.093	1.925	1.897	1.732	0.095	1.777	1.816	1.852	0.095	1.964	1.671	1.787
	17:15:12	37	1.528	1.48	1.389	0.092	1.274	1.348	1.472	0.094	0.657	0.769	0.679	0.093	1.741	1.549	1.565	0.091	1.534	1.503	1.483	0.093	1.134	1.014	1.032	0.091	1.609	1.486	1.641	0.095	1.673	1.75	1.498	0.095	1.103	0.979	0.938	0.093	1.943	1.947	1.768	0.095	1.801	1.846	1.87	0.095	1.974	1.699	1.812
	17:30:12	37	1.547	1.49	1.408	0.092	1.305	1.368	1.509	0.094	0.673	0.767	0.681	0.093	1.753	1.568	1.579	0.091	1.574	1.544	1.508	0.092	1.172	1.022	1.053	0.092	1.631	1.49	1.659	0.095	1.706	1.719	1.519	0.095	1.204	0.981	1.097	0.093	1.958	1.974	1.8	0.095	1.823	1.873	1.887	0.095	1.983	1.724	1.833
	17:45:12	37	1.563	1.502	1.428	0.092	1.335	1.395	1.535	0.094	0.714	0.767	0.684	0.093	1.762	1.588	1.592	0.091	1.611	1.584	1.536	0.092	1.222	1.031	1.079	0.091	1.652	1.501	1.678	0.095	1.733	1.697	1.535	0.095	1.286	0.981	1.125	0.093	1.971	2.002	1.829	0.095	1.84	1.894	1.902	0.095	1.991	1.746	1.853
	18:00:12	37	1.574	1.517	1.451	0.092	1.366	1.429	1.551	0.094	0.78	0.765	0.686	0.093	1.771	1.606	1.61	0.091	1.64	1.619	1.568	0.092	1.277	1.041	1.116	0.092	1.671	1.515	1.694	0.095	1.757	1.693	1.555	0.095	1.359	0.978	1.157	0.093	1.983	2.022	1.852	0.095	1.853	1.913	1.916	0.095	1.998	1.763	1.87
	18:15:12	37	1.585	1.532	1.474	0.092	1.399	1.466	1.556	0.094	0.845	0.772	0.688	0.093	1.78	1.623	1.627	0.091	1.661	1.649	1.607	0.093	1.337	1.053	1.159	0.092	1.687	1.532	1.708	0.095	1.774	1.692	1.578	0.095	1.425	0.972	1.201	0.093	1.994	2.063	1.871	0.095	1.865	1.929	1.928	0.095	2.003	1.78	1.885
	18:30:12	37	1.594	1.544	1.492	0.092	1.437	1.501	1.558	0.094	0.869	0.764	0.69	0.093	1.789	1.638	1.642	0.091	1.677	1.673	1.643	0.093	1.4	1.069	1.208	0.092	1.702	1.554	1.722	0.095	1.788	1.695	1.607	0.095	1.489	0.961	1.252	0.093	2.003	2.097	1.888	0.095	1.877	1.942	1.938	0.095	2.009	1.796	1.897
	18:45:12	37	1.6	1.556	1.511	0.092	1.464	1.527	1.56	0.094	0.877	0.756	0.692	0.093	1.797	1.652	1.658	0.091	1.691	1.693	1.671	0.092	1.463	1.09	1.262	0.092	1.713	1.575	1.734	0.095	1.801	1.696	1.638	0.095	1.559	0.988	1.31	0.093	2.01	2.113	1.904	0.095	1.887	1.953	1.947	0.095	2.014	1.812	1.907
	19:00:12	37	1.605	1.566	1.536	0.092	1.48	1.542	1.556	0.094	0.892	0.743	0.694	0.093	1.804	1.663	1.674	0.091	1.706	1.705	1.689	0.092	1.524	1.119	1.318	0.092	1.723	1.597	1.745	0.094	1.813	1.698	1.671	0.095	1.631	1.075	1.37	0.093	2.017	2.127	1.919	0.095	1.895	1.958	1.953	0.095	2.017	1.826	1.917
	19:15:12	37	1.61	1.575	1.558	0.092	1.482	1.554	1.55	0.094	0.91	0.736	0.695	0.093	1.81	1.673	1.688	0.091	1.719	1.712	1.697	0.092	1.581	1.157	1.374	0.092	1.734	1.617	1.756	0.095	1.818	1.697	1.702	0.095	1.691	1.194	1.43	0.093	2.023	2.133	1.932	0.095	1.904	1.96	1.959	0.095	2.019	1.84	1.925
	19:30:12	37	1.615	1.582	1.575	0.092	1.487	1.559	1.544	0.094	0.934	0.739	0.697	0.093	1.816	1.681	1.703	0.091	1.731	1.709	1.695	0.092	1.633	1.204	1.434	0.092	1.745	1.636	1.766	0.095	1.823	1.696	1.732	0.095	1.741	1.237	1.49	0.093	2.028	2.143	1.943	0.095	1.911	1.97	1.964	0.095	2.022	1.852	1.932
	19:45:12	37	1.619	1.588	1.585	0.092	1.489	1.563	1.534	0.094	0.963	0.75	0.698	0.093	1.821	1.688	1.717	0.091	1.743	1.703	1.689	0.092	1.685	1.256	1.493	0.092	1.754	1.653	1.774	0.095	1.82	1.696	1.755	0.095	1.786	1.249	1.548	0.093	2.032	2.145	1.953	0.095	1.917	1.975	1.969	0.095	2.024	1.863	1.938
	20:00:12	37	1.624	1.594	1.591	0.092	1.487	1.561	1.527	0.094	1	0.769	0.699	0.093	1.825	1.693	1.728	0.091	1.741	1.692	1.678	0.093	1.732	1.31	1.549	0.092	1.764	1.669	1.782	0.095	1.813	1.692	1.771	0.095	1.821	1.285	1.602	0.093	2.035	2.152	1.961	0.095	1.922	1.977	1.973	0.095	2.025	1.872	1.943
	20:15:12	37	1.627	1.599	1.594	0.092	1.487	1.554	1.524	0.094	1.042	0.794	0.7	0.093	1.83	1.698	1.738	0.091	1.731	1.685	1.67	0.092	1.78	1.369	1.604	0.092	1.772	1.684	1.788	0.094	1.779	1.689	1.774	0.095	1.847	1.33	1.65	0.093	2.037	2.156	1.97	0.095	1.927	1.979	1.977	0.095	2.026	1.88	1.947
	20:30:12	37	1.63	1.604	1.597	0.092	1.468	1.546	1.513	0.094	1.086	0.825	0.701	0.093	1.834	1.702	1.746	0.091	1.708	1.67	1.661	0.092	1.816	1.431	1.651	0.092	1.779	1.697	1.796	0.094	1.755	1.685	1.761	0.095	1.866	1.379	1.692	0.093	2.035	2.159	1.978	0.095	1.931	1.981	1.981	0.095	2.027	1.887	1.95
	20:45:12	37	1.633	1.607	1.598	0.092	1.455	1.536	1.503	0.094	1.131	0.855	0.703	0.093	1.836	1.705	1.754	0.091	1.692	1.658	1.652	0.092	1.841	1.494	1.696	0.092	1.785	1.708	1.802	0.095	1.739	1.681	1.758	0.095	1.883	1.435	1.727	0.093	2.035	2.162	1.985	0.095	1.935	1.982	1.985	0.095	2.027	1.893	1.954
	21:00:12	37	1.634	1.611	1.601	0.092	1.443	1.527	1.491	0.094	1.177	0.884	0.704	0.093	1.839	1.708	1.76	0.091	1.684	1.646	1.643	0.092	1.865	1.554	1.735	0.092	1.79	1.719	1.808	0.094	1.728	1.675	1.752	0.095	1.903	1.492	1.757	0.093	2.036	2.163	1.992	0.095	1.938	1.984	1.988	0.095	2.028	1.899	1.956
	21:15:12	37	1.636	1.613	1.603	0.092	1.437	1.518	1.482	0.094	1.226	0.911	0.705	0.093	1.842	1.711	1.766	0.091	1.674	1.629	1.633	0.092	1.882	1.608	1.768	0.092	1.795	1.728	1.812	0.094	1.718	1.671	1.747	0.095	1.912	1.549	1.785	0.093	2.037	2.167	1.999	0.095	1.941	1.987	1.992	0.095	2.028	1.905	1.958
	21:30:12	37	1.638	1.616	1.604	0.092	1.431	1.509	1.47	0.094	1.277	0.939	0.707	0.093	1.843	1.713	1.77	0.091	1.673	1.613	1.623	0.092	1.9	1.655	1.797	0.092	1.8	1.734	1.817	0.094	1.707	1.666	1.74	0.095	1.92	1.606	1.808	0.093	2.038	2.17	2.006	0.095	1.944	1.989	1.995	0.095	2.028	1.909	1.96
	21:45:12	37	1.639	1.618	1.605	0.092	1.424	1.5	1.448	0.094	1.327	0.966	0.707	0.093	1.843	1.715	1.775	0.091	1.662	1.6	1.611	0.092	1.916	1.7	1.823	0.092	1.804	1.741	1.821	0.094	1.69	1.663	1.732	0.095	1.926	1.658	1.827	0.093	2.039	2.171	2.012	0.095	1.946	1.991	1.998	0.095	2.027	1.913	1.962
	22:00:12	37	1.641	1.619	1.607	0.092	1.408	1.49	1.434	0.094	1.376	0.998	0.709	0.093	1.844	1.718	1.78	0.091	1.647	1.588	1.596	0.092	1.933	1.744	1.844	0.092	1.808	1.746	1.829	0.095	1.667	1.661	1.721	0.095	1.932	1.703	1.843	0.093	2.039	2.171	2.017	0.095	1.948	1.993	2	0.095	2.027	1.918	1.963
	22:15:12	37	1.641	1.621	1.607	0.092	1.383	1.479	1.431	0.094	1.421	1.036	0.711	0.093	1.845	1.719	1.783	0.091	1.631	1.579	1.581	0.092	1.946	1.784	1.861	0.092	1.811	1.752	1.833	0.094	1.649	1.659	1.704	0.095	1.938	1.742	1.857	0.093	2.04	2.17	2.021	0.095	1.951	1.994	2.003	0.095	2.026	1.922	1.964
	22:30:12	37	1.642	1.622	1.609	0.092	1.367	1.47	1.429	0.094	1.464	1.08	0.712	0.093	1.846	1.722	1.786	0.091	1.615	1.568	1.564	0.092	1.96	1.817	1.879	0.092	1.815	1.756	1.838	0.094	1.634	1.657	1.679	0.095	1.945	1.78	1.867	0.093	2.041	2.174	2.026	0.095	1.953	1.997	2.006	0.095	2.026	1.925	1.965
	22:45:12	37	1.643	1.623	1.609	0.092	1.358	1.461	1.427	0.094	1.504	1.126	0.712	0.093	1.846	1.723	1.789	0.091	1.601	1.557	1.545	0.092	1.97	1.845	1.898	0.092	1.818	1.761	1.842	0.094	1.62	1.656	1.654	0.095	1.951	1.814	1.874	0.093	2.041	2.173	2.03	0.095	1.955	1.999	2.009	0.095	2.025	1.928	1.966
	23:00:12	37	1.643	1.624	1.61	0.092	1.354	1.449	1.428	0.094	1.541	1.175	0.713	0.093	1.846	1.725	1.792	0.091	1.588	1.546	1.524	0.092	1.981	1.864	1.912	0.092	1.821	1.764	1.846	0.094	1.609	1.656	1.638	0.095	1.959	1.846	1.881	0.093	2.041	2.182	2.034	0.095	1.957	2.001	2.011	0.095	2.024	1.931	1.966
	23:15:12	37	1.644	1.625	1.61	0.092	1.353	1.441	1.426	0.094	1.575	1.224	0.714	0.093	1.846	1.727	1.794	0.091	1.576	1.536	1.505	0.092	1.99	1.88	1.927	0.092	1.823	1.768	1.85	0.094	1.598	1.655	1.621	0.095	1.969	1.882	1.885	0.093	2.041	2.18	2.038	0.095	1.958	2.002	2.013	0.095	2.022	1.933	1.966
	23:30:12	37	1.645	1.626	1.61	0.092	1.355	1.439	1.424	0.094	1.606	1.275	0.714	0.093	1.846	1.729	1.796	0.091	1.567	1.531	1.49	0.092	1.999	1.898	1.938	0.092	1.825	1.772	1.853	0.094	1.592	1.654	1.609	0.095	1.979	1.907	1.889	0.093	2.041	2.177	2.042	0.095	1.96	2.004	2.014	0.095	2.022	1.935	1.966
	23:45:12	37	1.645	1.626	1.611	0.092	1.356	1.439	1.424	0.094	1.634	1.326	0.715	0.093	1.846	1.73	1.799	0.091	1.562	1.528	1.478	0.092	2.01	1.918	1.953	0.092	1.828	1.774	1.856	0.094	1.584	1.652	1.596	0.095	1.987	1.926	1.893	0.093	2.041	2.177	2.047	0.095	1.961	2.007	2.016	0.095	2.022	1.937	1.966
	1 day, 0:00:12	37.1	1.646	1.627	1.611	0.092	1.357	1.441	1.424	0.094	1.659	1.374	0.716	0.093	1.846	1.732	1.8	0.091	1.56	1.526	1.472	0.092	2.02	1.936	1.966	0.092	1.83	1.778	1.859	0.094	1.579	1.65	1.584	0.095	1.994	1.943	1.9	0.093	2.041	2.179	2.05	0.095	1.962	2.009	2.017	0.095	2.021	1.939	1.966
	1 day, 0:15:12	37	1.646	1.628	1.61	0.092	1.356	1.444	1.425	0.094	1.68	1.422	0.716	0.093	1.846	1.734	1.803	0.091	1.559	1.525	1.469	0.092	2.03	1.952	1.984	0.092	1.832	1.781	1.861	0.094	1.574	1.649	1.577	0.095	2.002	1.96	1.906	0.093	2.04	2.181	2.053	0.095	1.963	2.009	2.019	0.095	2.02	1.94	1.965
	1 day, 0:30:12	37	1.646	1.628	1.61	0.092	1.355	1.446	1.426	0.094	1.7	1.466	0.717	0.093	1.845	1.736	1.805	0.091	1.558	1.526	1.468	0.092	2.042	1.967	2.003	0.092	1.834	1.784	1.864	0.094	1.571	1.648	1.57	0.095	2.008	1.977	1.91	0.093	2.041	2.179	2.056	0.095	1.964	2.011	2.02	0.095	2.019	1.941	1.964
	1 day, 0:45:12	37	1.647	1.629	1.61	0.092	1.356	1.447	1.429	0.094	1.72	1.506	0.718	0.093	1.844	1.737	1.806	0.091	1.56	1.529	1.468	0.092	2.051	1.983	2.016	0.092	1.836	1.787	1.867	0.094	1.567	1.648	1.563	0.095	2.015	1.992	1.915	0.093	2.039	2.181	2.061	0.095	1.965	2.011	2.022	0.095	2.018	1.943	1.964
	1 day, 1:00:12	37	1.647	1.629	1.611	0.092	1.357	1.448	1.432	0.094	1.738	1.543	0.719	0.093	1.843	1.739	1.809	0.091	1.562	1.531	1.47	0.092	2.059	1.998	2.025	0.092	1.837	1.79	1.87	0.094	1.565	1.648	1.558	0.095	2.02	2.007	1.918	0.093	2.039	2.185	2.063	0.095	1.965	2.013	2.022	0.095	2.016	1.944	1.963
	1 day, 1:15:12	37	1.647	1.63	1.611	0.092	1.36	1.449	1.435	0.094	1.751	1.577	0.719	0.093	1.843	1.74	1.811	0.091	1.564	1.534	1.473	0.092	2.065	2.009	2.031	0.092	1.839	1.794	1.873	0.094	1.564	1.649	1.554	0.095	2.026	2.02	1.921	0.093	2.038	2.183	2.062	0.095	1.966	2.014	2.023	0.095	2.014	1.944	1.962
	1 day, 1:30:12	37	1.647	1.63	1.611	0.092	1.364	1.451	1.437	0.094	1.763	1.609	0.72	0.093	1.842	1.741	1.813	0.091	1.566	1.538	1.479	0.092	2.068	2.018	2.035	0.092	1.84	1.796	1.874	0.094	1.564	1.648	1.553	0.095	2.031	2.031	1.924	0.093	2.038	2.185	2.063	0.095	1.966	2.014	2.024	0.095	2.012	1.945	1.961
	1 day, 1:45:12	37	1.647	1.63	1.611	0.092	1.367	1.453	1.439	0.094	1.77	1.641	0.721	0.093	1.841	1.743	1.814	0.091	1.568	1.541	1.483	0.092	2.07	2.019	2.041	0.092	1.842	1.799	1.876	0.094	1.564	1.648	1.552	0.095	2.035	2.041	1.927	0.093	2.038	2.188	2.063	0.095	1.967	2.014	2.026	0.095	2.01	1.946	1.96
	1 day, 2:00:12	37	1.647	1.63	1.611	0.092	1.371	1.454	1.443	0.094	1.779	1.669	0.721	0.093	1.839	1.744	1.817	0.091	1.571	1.545	1.49	0.092	2.067	2.024	2.046	0.092	1.843	1.803	1.878	0.094	1.563	1.649	1.552	0.095	2.038	2.048	1.927	0.093	2.037	2.184	2.064	0.095	1.967	2.012	2.026	0.095	2.008	1.946	1.958
	1 day, 2:15:12	37	1.647	1.631	1.611	0.092	1.376	1.457	1.446	0.094	1.786	1.706	0.722	0.093	1.839	1.745	1.818	0.091	1.574	1.549	1.495	0.092	2.065	2.028	2.05	0.092	1.844	1.805	1.879	0.094	1.563	1.649	1.555	0.095	2.039	2.054	1.927	0.093	2.036	2.183	2.064	0.095	1.968	2.012	2.027	0.095	2.005	1.946	1.958
	1 day, 2:30:12	37	1.647	1.631	1.611	0.092	1.382	1.459	1.45	0.094	1.791	1.742	0.723	0.093	1.838	1.747	1.821	0.091	1.577	1.552	1.499	0.092	2.068	2.032	2.055	0.092	1.845	1.807	1.882	0.094	1.564	1.649	1.558	0.095	2.038	2.056	1.93	0.093	2.035	2.182	2.064	0.095	1.968	2.012	2.027	0.095	2.003	1.947	1.957
	1 day, 2:45:12	37	1.647	1.631	1.611	0.092	1.387	1.463	1.452	0.094	1.797	1.768	0.723	0.093	1.837	1.747	1.822	0.091	1.579	1.556	1.503	0.092	2.072	2.033	2.058	0.092	1.846	1.81	1.884	0.094	1.565	1.649	1.56	0.095	2.037	2.054	1.93	0.093	2.033	2.186	2.063	0.095	1.968	2.012	2.028	0.095	2	1.947	1.955
	1 day, 3:00:12	37	1.647	1.632	1.611	0.092	1.392	1.465	1.455	0.094	1.801	1.783	0.724	0.093	1.836	1.749	1.824	0.091	1.582	1.559	1.508	0.092	2.076	2.035	2.06	0.092	1.847	1.813	1.884	0.094	1.566	1.65	1.561	0.095	2.033	2.05	1.931	0.093	2.032	2.186	2.056	0.095	1.968	2.012	2.025	0.095	1.998	1.947	1.954
	1 day, 3:15:12	37	1.646	1.632	1.611	0.092	1.397	1.47	1.461	0.094	1.805	1.796	0.724	0.093	1.835	1.75	1.826	0.091	1.586	1.561	1.512	0.092	2.08	2.036	2.062	0.091	1.847	1.815	1.886	0.094	1.567	1.65	1.562	0.095	2.027	2.041	1.933	0.093	2.031	2.187	2.049	0.095	1.968	2.012	2.026	0.095	1.996	1.948	1.952
	1 day, 3:30:12	37	1.646	1.632	1.612	0.092	1.405	1.474	1.464	0.094	1.807	1.808	0.726	0.093	1.833	1.751	1.828	0.091	1.589	1.565	1.515	0.092	2.084	2.038	2.063	0.092	1.849	1.818	1.888	0.094	1.568	1.651	1.565	0.095	2.022	2.029	1.932	0.093	2.03	2.186	2.041	0.095	1.968	2.011	2.026	0.095	1.993	1.948	1.951
	1 day, 3:45:12	37	1.646	1.633	1.612	0.092	1.41	1.478	1.469	0.094	1.81	1.818	0.727	0.093	1.832	1.752	1.829	0.091	1.594	1.567	1.518	0.092	2.086	2.039	2.065	0.092	1.848	1.82	1.89	0.094	1.57	1.651	1.567	0.095	2.013	2.02	1.934	0.093	2.03	2.185	2.04	0.095	1.967	2.012	2.025	0.095	1.991	1.948	1.949
	1 day, 4:00:12	37	1.645	1.633	1.612	0.092	1.417	1.484	1.472	0.094	1.811	1.828	0.727	0.093	1.831	1.753	1.831	0.091	1.596	1.569	1.522	0.092	2.088	2.041	2.066	0.092	1.849	1.822	1.891	0.094	1.571	1.651	1.567	0.095	2.004	2.02	1.933	0.093	2.028	2.19	2.037	0.095	1.967	2.013	2.026	0.095	1.989	1.948	1.947
	1 day, 4:15:12	37	1.645	1.633	1.612	0.092	1.425	1.487	1.476	0.094	1.813	1.834	0.728	0.093	1.829	1.754	1.833	0.091	1.599	1.571	1.526	0.092	2.092	2.042	2.067	0.092	1.85	1.825	1.893	0.094	1.572	1.651	1.568	0.095	1.994	2.02	1.933	0.093	2.027	2.189	2.036	0.095	1.967	2.013	2.025	0.095	1.986	1.948	1.946
	1 day, 4:30:12	37	1.644	1.633	1.612	0.092	1.431	1.493	1.481	0.094	1.812	1.844	0.728	0.093	1.828	1.755	1.835	0.091	1.603	1.574	1.53	0.092	2.094	2.043	2.068	0.092	1.849	1.827	1.893	0.094	1.573	1.652	1.569	0.095	1.988	2.02	1.937	0.093	2.026	2.189	2.034	0.095	1.966	2.013	2.024	0.095	1.984	1.948	1.944
	1 day, 4:45:12	37	1.643	1.633	1.612	0.092	1.44	1.498	1.487	0.094	1.814	1.848	0.729	0.093	1.827	1.756	1.836	0.091	1.605	1.576	1.532	0.092	2.094	2.043	2.069	0.092	1.85	1.829	1.894	0.094	1.574	1.653	1.57	0.095	1.988	2.022	1.937	0.093	2.024	2.188	2.033	0.095	1.967	2.013	2.025	0.094	1.981	1.948	1.943
	1 day, 5:00:12	37	1.643	1.633	1.612	0.092	1.445	1.502	1.488	0.094	1.813	1.851	0.729	0.093	1.825	1.756	1.838	0.091	1.609	1.579	1.536	0.092	2.095	2.044	2.069	0.091	1.85	1.831	1.895	0.094	1.575	1.653	1.57	0.095	1.987	2.022	1.932	0.093	2.023	2.19	2.032	0.095	1.967	2.013	2.024	0.095	1.977	1.947	1.941
	1 day, 5:15:12	37	1.642	1.633	1.612	0.092	1.449	1.508	1.493	0.094	1.813	1.853	0.73	0.093	1.824	1.757	1.839	0.091	1.614	1.582	1.539	0.092	2.096	2.045	2.07	0.092	1.85	1.833	1.897	0.094	1.576	1.653	1.573	0.095	1.986	2.024	1.929	0.093	2.022	2.185	2.03	0.095	1.966	2.013	2.023	0.095	1.974	1.947	1.939
	1 day, 5:30:12	37.1	1.641	1.633	1.612	0.092	1.455	1.512	1.498	0.094	1.814	1.855	0.731	0.093	1.823	1.758	1.84	0.091	1.617	1.585	1.546	0.092	2.096	2.046	2.071	0.092	1.85	1.835	1.898	0.094	1.578	1.654	1.573	0.095	1.984	2.022	1.927	0.093	2.021	2.189	2.028	0.095	1.964	2.013	2.023	0.094	1.969	1.947	1.937
	1 day, 5:45:12	37	1.64	1.633	1.612	0.092	1.462	1.518	1.502	0.094	1.812	1.855	0.731	0.093	1.821	1.758	1.841	0.091	1.619	1.587	1.55	0.092	2.097	2.045	2.07	0.091	1.85	1.837	1.899	0.094	1.579	1.654	1.574	0.095	1.984	2.021	1.924	0.093	2.019	2.188	2.027	0.095	1.966	2.013	2.023	0.094	1.964	1.946	1.935
	1 day, 6:00:12	37	1.639	1.633	1.613	0.092	1.467	1.523	1.505	0.094	1.811	1.855	0.731	0.093	1.82	1.759	1.843	0.091	1.621	1.589	1.554	0.092	2.098	2.046	2.07	0.091	1.85	1.839	1.899	0.094	1.58	1.655	1.574	0.095	1.984	2.021	1.924	0.093	2.018	2.19	2.027	0.095	1.966	2.012	2.023	0.094	1.96	1.946	1.934
	1 day, 6:15:12	36.9	1.638	1.633	1.613	0.092	1.471	1.529	1.508	0.094	1.811	1.854	0.732	0.093	1.819	1.76	1.844	0.091	1.623	1.592	1.556	0.092	2.098	2.046	2.07	0.092	1.85	1.841	1.901	0.094	1.58	1.656	1.576	0.095	1.983	2.018	1.924	0.093	2.017	2.188	2.026	0.095	1.966	2.012	2.023	0.095	1.956	1.946	1.933
	1 day, 6:30:12	37	1.637	1.633	1.613	0.092	1.478	1.534	1.514	0.094	1.807	1.853	0.732	0.093	1.818	1.76	1.846	0.091	1.624	1.594	1.56	0.092	2.098	2.046	2.069	0.091	1.849	1.843	1.901	0.094	1.581	1.656	1.577	0.095	1.981	2.019	1.923	0.093	2.015	2.188	2.025	0.095	1.968	2.012	2.022	0.094	1.95	1.945	1.93
	1 day, 6:45:12	37	1.637	1.633	1.613	0.092	1.482	1.539	1.519	0.094	1.805	1.851	0.732	0.093	1.817	1.76	1.847	0.091	1.627	1.596	1.565	0.092	2.098	2.046	2.069	0.092	1.849	1.844	1.902	0.094	1.583	1.657	1.578	0.095	1.979	2.02	1.924	0.093	2.014	2.188	2.024	0.095	1.967	2.011	2.022	0.095	1.946	1.945	1.928
	1 day, 7:00:12	37	1.636	1.632	1.613	0.092	1.489	1.544	1.522	0.093	1.804	1.851	0.733	0.093	1.815	1.76	1.847	0.091	1.628	1.598	1.571	0.092	2.098	2.046	2.068	0.091	1.849	1.846	1.902	0.094	1.583	1.657	1.579	0.095	1.976	2.019	1.931	0.093	2.013	2.187	2.022	0.094	1.965	2.011	2.021	0.094	1.941	1.944	1.927
	1 day, 7:15:12	37	1.635	1.632	1.613	0.092	1.496	1.55	1.526	0.094	1.8	1.849	0.733	0.093	1.814	1.761	1.848	0.091	1.632	1.6	1.574	0.092	2.098	2.045	2.067	0.092	1.848	1.848	1.903	0.094	1.583	1.658	1.579	0.095	1.975	2.018	1.934	0.093	2.011	2.186	2.022	0.095	1.963	2.01	2.021	0.095	1.936	1.943	1.924
	1 day, 7:30:12	37	1.634	1.632	1.613	0.092	1.501	1.556	1.53	0.094	1.799	1.848	0.733	0.093	1.813	1.761	1.849	0.091	1.635	1.601	1.576	0.092	2.098	2.045	2.066	0.092	1.848	1.849	1.904	0.094	1.584	1.658	1.58	0.095	1.973	2.019	1.938	0.093	2.01	2.184	2.021	0.095	1.96	2.009	2.02	0.095	1.93	1.943	1.923
	1 day, 7:45:12	37	1.632	1.632	1.612	0.092	1.504	1.56	1.534	0.094	1.798	1.846	0.733	0.093	1.811	1.762	1.85	0.091	1.636	1.603	1.579	0.092	2.098	2.045	2.058	0.092	1.847	1.851	1.904	0.094	1.585	1.659	1.581	0.095	1.97	2.02	1.942	0.093	2.009	2.183	2.02	0.094	1.958	2.009	2.019	0.095	1.924	1.943	1.921
	1 day, 8:00:12	37	1.631	1.632	1.612	0.092	1.508	1.564	1.538	0.094	1.797	1.844	0.733	0.093	1.81	1.762	1.85	0.091	1.638	1.603	1.581	0.092	2.098	2.044	2.054	0.092	1.847	1.852	1.904	0.094	1.586	1.659	1.581	0.095	1.968	2.021	1.945	0.093	2.007	2.187	2.019	0.095	1.955	2.009	2.018	0.094	1.921	1.942	1.919
	1 day, 8:15:12	37	1.63	1.631	1.612	0.092	1.514	1.57	1.542	0.094	1.795	1.841	0.733	0.093	1.808	1.762	1.851	0.091	1.64	1.606	1.583	0.092	2.098	2.043	2.045	0.092	1.846	1.853	1.905	0.094	1.587	1.66	1.58	0.095	1.965	2.021	1.949	0.093	2.006	2.184	2.018	0.095	1.953	2.007	2.018	0.094	1.915	1.941	1.917
	1 day, 8:30:12	37	1.629	1.631	1.612	0.092	1.52	1.574	1.546	0.094	1.793	1.836	0.733	0.093	1.807	1.763	1.852	0.091	1.643	1.608	1.585	0.092	2.097	2.043	2.04	0.092	1.846	1.854	1.904	0.094	1.588	1.661	1.58	0.095	1.964	2.019	1.953	0.093	2.004	2.186	2.018	0.095	1.951	2.007	2.019	0.094	1.91	1.941	1.915
	1 day, 8:45:12	37	1.628	1.631	1.611	0.092	1.524	1.576	1.55	0.094	1.788	1.833	0.733	0.093	1.806	1.763	1.853	0.091	1.644	1.609	1.588	0.092	2.097	2.043	2.037	0.092	1.845	1.856	1.904	0.094	1.588	1.662	1.582	0.095	1.962	2.019	1.956	0.093	2.003	2.183	2.017	0.095	1.95	2.008	2.018	0.094	1.906	1.94	1.913
	1 day, 9:00:12	37	1.627	1.63	1.611	0.092	1.528	1.582	1.553	0.094	1.784	1.83	0.734	0.093	1.805	1.763	1.854	0.091	1.646	1.611	1.591	0.092	2.097	2.042	2.034	0.092	1.845	1.857	1.903	0.094	1.589	1.662	1.583	0.095	1.961	2.02	1.96	0.093	2.002	2.187	2.017	0.095	1.947	2.008	2.018	0.095	1.904	1.94	1.911
	1 day, 9:15:12	37	1.626	1.63	1.611	0.092	1.534	1.588	1.557	0.094	1.78	1.827	0.734	0.093	1.803	1.763	1.854	0.091	1.647	1.612	1.592	0.092	2.097	2.041	2.031	0.092	1.844	1.858	1.904	0.094	1.589	1.663	1.583	0.095	1.959	2.02	1.96	0.093	2	2.186	2.016	0.095	1.944	2.008	2.018	0.094	1.899	1.939	1.909
	1 day, 9:30:12	37.1	1.624	1.63	1.611	0.092	1.539	1.591	1.56	0.094	1.775	1.824	0.735	0.093	1.802	1.763	1.855	0.091	1.649	1.614	1.595	0.092	2.097	2.041	2.031	0.092	1.843	1.859	1.903	0.094	1.591	1.663	1.584	0.095	1.956	2.018	1.963	0.093	1.998	2.182	2.015	0.095	1.941	2.008	2.017	0.094	1.893	1.938	1.907
	1 day, 9:45:12	36.9	1.623	1.63	1.61	0.092	1.542	1.598	1.562	0.094	1.771	1.822	0.734	0.093	1.8	1.763	1.855	0.091	1.65	1.615	1.597	0.092	2.097	2.04	2.03	0.092	1.843	1.86	1.903	0.094	1.591	1.664	1.584	0.095	1.954	2.017	1.963	0.093	1.998	2.184	2.015	0.095	1.939	2.011	2.017	0.094	1.888	1.938	1.905
	1 day, 10:00:12	36.9	1.622	1.63	1.61	0.092	1.549	1.6	1.565	0.094	1.767	1.819	0.734	0.093	1.799	1.763	1.856	0.091	1.651	1.617	1.599	0.092	2.096	2.039	2.029	0.092	1.842	1.861	1.903	0.094	1.591	1.665	1.584	0.095	1.952	2.013	1.965	0.093	1.996	2.184	2.014	0.095	1.937	2.009	2.017	0.094	1.884	1.937	1.903
	1 day, 10:15:12	37	1.621	1.629	1.61	0.092	1.551	1.603	1.568	0.094	1.764	1.813	0.734	0.093	1.797	1.762	1.856	0.091	1.653	1.619	1.601	0.092	2.096	2.038	2.028	0.092	1.841	1.862	1.902	0.094	1.592	1.665	1.585	0.095	1.95	2.022	1.966	0.093	1.994	2.184	2.014	0.095	1.935	2.009	2.017	0.094	1.879	1.936	1.901
	1 day, 10:30:12	37	1.619	1.629	1.61	0.092	1.555	1.609	1.569	0.094	1.761	1.808	0.735	0.093	1.796	1.762	1.857	0.091	1.655	1.619	1.603	0.092	2.096	2.037	2.026	0.092	1.841	1.862	1.902	0.094	1.593	1.666	1.586	0.095	1.948	2.022	1.97	0.093	1.992	2.181	2.014	0.094	1.933	2.008	2.017	0.094	1.875	1.935	1.899
	1 day, 10:45:12	37	1.618	1.629	1.609	0.092	1.559	1.61	1.573	0.094	1.758	1.802	0.738	0.093	1.794	1.762	1.857	0.091	1.656	1.621	1.605	0.092	2.096	2.036	2.025	0.092	1.84	1.863	1.901	0.094	1.593	1.667	1.586	0.095	1.946	2.022	1.973	0.093	1.991	2.18	2.013	0.095	1.932	2.007	2.016	0.094	1.871	1.934	1.897
	1 day, 11:00:12	37	1.617	1.628	1.609	0.092	1.564	1.615	1.574	0.094	1.754	1.798	0.746	0.093	1.793	1.762	1.858	0.091	1.658	1.622	1.606	0.092	2.095	2.035	2.023	0.092	1.84	1.863	1.9	0.094	1.593	1.667	1.586	0.095	1.944	2.026	1.976	0.093	1.99	2.179	2.012	0.095	1.931	2.005	2.015	0.094	1.867	1.933	1.895
	1 day, 11:15:12	37	1.616	1.627	1.609	0.092	1.565	1.617	1.579	0.094	1.759	1.794	0.757	0.093	1.792	1.762	1.858	0.091	1.659	1.623	1.607	0.092	2.095	2.033	2.024	0.092	1.839	1.864	1.9	0.094	1.594	1.668	1.588	0.095	1.943	2.027	1.98	0.093	1.988	2.183	2.012	0.095	1.929	2.003	2.014	0.094	1.863	1.933	1.893
	1 day, 11:30:12	37	1.614	1.627	1.609	0.092	1.571	1.622	1.581	0.094	1.759	1.789	0.77	0.093	1.79	1.762	1.858	0.091	1.659	1.625	1.609	0.092	2.094	2.032	2.023	0.091	1.838	1.864	1.901	0.094	1.595	1.669	1.587	0.095	1.94	2.026	1.984	0.093	1.986	2.18	2.011	0.094	1.927	2.005	2.014	0.094	1.859	1.931	1.891
	1 day, 11:45:12	37	1.613	1.627	1.608	0.092	1.573	1.623	1.583	0.094	1.758	1.786	0.782	0.093	1.789	1.761	1.859	0.091	1.66	1.628	1.609	0.092	2.094	2.031	2.021	0.092	1.838	1.865	1.9	0.094	1.595	1.669	1.588	0.095	1.938	2.023	1.988	0.093	1.985	2.181	2.011	0.095	1.925	2.006	2.013	0.094	1.855	1.93	1.888
	1 day, 12:00:12	37	1.612	1.627	1.608	0.092	1.578	1.628	1.585	0.094	1.756	1.783	0.795	0.093	1.788	1.762	1.859	0.091	1.662	1.63	1.611	0.092	2.093	2.031	2.022	0.092	1.837	1.865	1.9	0.094	1.596	1.67	1.588	0.095	1.936	2.028	1.991	0.093	1.983	2.178	2.01	0.094	1.924	2.008	2.012	0.095	1.851	1.93	1.886
	1 day, 12:15:12	37	1.611	1.626	1.608	0.092	1.579	1.63	1.588	0.094	1.753	1.779	0.808	0.093	1.786	1.761	1.859	0.091	1.663	1.631	1.611	0.092	2.092	2.03	2.022	0.091	1.836	1.866	1.901	0.094	1.596	1.671	1.587	0.095	1.935	2.026	1.997	0.093	1.982	2.18	2.009	0.094	1.922	2.008	2.011	0.094	1.847	1.928	1.884
	1 day, 12:30:12	37	1.61	1.626	1.607	0.092	1.583	1.633	1.591	0.093	1.751	1.774	0.811	0.093	1.784	1.761	1.859	0.091	1.665	1.632	1.612	0.092	2.092	2.029	2.021	0.092	1.835	1.866	1.901	0.094	1.597	1.672	1.589	0.095	1.933	2.023	2.001	0.093	1.981	2.179	2.009	0.094	1.921	2.007	2.011	0.094	1.843	1.927	1.881
	1 day, 12:45:12	36.9	1.609	1.625	1.607	0.092	1.583	1.634	1.593	0.094	1.749	1.772	0.821	0.093	1.782	1.761	1.859	0.091	1.667	1.633	1.613	0.092	2.091	2.028	2.02	0.092	1.835	1.865	1.9	0.094	1.598	1.673	1.589	0.095	1.933	2.031	2.003	0.093	1.979	2.18	2.009	0.094	1.919	2.006	2.01	0.094	1.84	1.927	1.879
	1 day, 13:00:12	37	1.607	1.625	1.607	0.092	1.588	1.639	1.596	0.094	1.745	1.769	0.825	0.093	1.781	1.76	1.86	0.091	1.669	1.634	1.615	0.092	2.091	2.028	2.019	0.092	1.833	1.865	1.9	0.094	1.598	1.674	1.59	0.095	1.931	2.035	2.005	0.093	1.977	2.181	2.008	0.095	1.919	2.005	2.01	0.094	1.837	1.926	1.877
	1 day, 13:15:12	37	1.606	1.625	1.607	0.092	1.589	1.639	1.601	0.093	1.742	1.766	0.826	0.093	1.779	1.76	1.861	0.091	1.668	1.635	1.615	0.092	2.089	2.026	2.018	0.092	1.833	1.863	1.9	0.094	1.598	1.674	1.59	0.095	1.93	2.036	1.933	0.093	1.975	2.18	2.008	0.094	1.917	2.003	2.009	0.094	1.834	1.924	1.875
	1 day, 13:30:12	37	1.605	1.625	1.606	0.092	1.593	1.644	1.6	0.094	1.734	1.763	0.837	0.093	1.778	1.76	1.861	0.091	1.67	1.636	1.617	0.092	2.088	2.026	2.018	0.092	1.832	1.864	1.9	0.094	1.6	1.675	1.591	0.095	1.929	2.041	1.929	0.093	1.974	2.179	2.007	0.095	1.916	2.004	2.008	0.094	1.831	1.923	1.872
	1 day, 13:45:12	37	1.604	1.625	1.606	0.092	1.596	1.645	1.605	0.094	1.728	1.761	0.842	0.093	1.777	1.76	1.861	0.091	1.671	1.637	1.619	0.092	2.088	2.024	2.016	0.092	1.831	1.863	1.9	0.094	1.6	1.676	1.591	0.095	1.927	2.048	1.926	0.093	1.972	2.176	2.007	0.094	1.914	2.005	2.007	0.094	1.827	1.922	1.871
	1 day, 14:00:12	36.9	1.602	1.624	1.605	0.092	1.6	1.651	1.605	0.093	1.73	1.758	0.848	0.093	1.775	1.759	1.861	0.091	1.672	1.639	1.619	0.092	2.087	2.023	2.016	0.092	1.83	1.863	1.9	0.094	1.601	1.677	1.59	0.095	1.925	2.06	1.919	0.093	1.97	2.178	2.006	0.094	1.913	2.006	2.007	0.094	1.824	1.921	1.868
	1 day, 14:15:12	37	1.601	1.623	1.605	0.092	1.6	1.654	1.607	0.093	1.73	1.756	0.852	0.093	1.773	1.759	1.861	0.091	1.673	1.64	1.622	0.092	2.087	2.023	2.017	0.091	1.829	1.861	1.9	0.094	1.601	1.677	1.591	0.095	1.922	2.061	1.909	0.093	1.968	2.175	2.006	0.094	1.911	2.006	2.005	0.094	1.819	1.92	1.865
	1 day, 14:30:12	37	1.6	1.623	1.605	0.092	1.601	1.657	1.607	0.094	1.734	1.754	0.859	0.093	1.772	1.758	1.861	0.091	1.676	1.64	1.623	0.092	2.086	2.022	2.016	0.092	1.829	1.861	1.9	0.094	1.601	1.678	1.591	0.095	1.919	2.066	1.904	0.093	1.967	2.175	2.006	0.095	1.909	2.007	2.005	0.094	1.816	1.919	1.864
	1 day, 14:45:12	37	1.599	1.623	1.605	0.092	1.603	1.662	1.609	0.093	1.732	1.751	0.86	0.093	1.77	1.758	1.861	0.091	1.677	1.642	1.623	0.092	2.085	2.022	2.015	0.091	1.827	1.861	1.9	0.094	1.602	1.679	1.591	0.095	1.918	2.067	1.898	0.093	1.965	2.178	2.005	0.094	1.907	2.009	2.005	0.094	1.812	1.918	1.862
	1 day, 15:00:12	37	1.598	1.623	1.605	0.092	1.603	1.663	1.611	0.094	1.73	1.749	0.881	0.093	1.768	1.758	1.861	0.091	1.678	1.643	1.623	0.092	2.085	2.021	2.014	0.092	1.827	1.86	1.899	0.094	1.602	1.68	1.592	0.095	1.914	2.069	1.899	0.093	1.964	2.177	2.005	0.095	1.905	2.009	2.004	0.094	1.808	1.917	1.859
	1 day, 15:15:12	37	1.596	1.622	1.604	0.092	1.607	1.668	1.613	0.094	1.727	1.747	0.904	0.093	1.767	1.757	1.861	0.091	1.679	1.644	1.624	0.092	2.084	2.02	2.014	0.092	1.826	1.859	1.899	0.094	1.604	1.68	1.593	0.095	1.911	2.072	1.896	0.093	1.962	2.176	2.004	0.094	1.903	2.006	2.003	0.094	1.805	1.916	1.857
	1 day, 15:30:12	37	1.595	1.623	1.603	0.092	1.605	1.669	1.613	0.093	1.718	1.745	0.92	0.093	1.765	1.757	1.861	0.091	1.68	1.645	1.625	0.092	2.083	2.02	2.012	0.091	1.824	1.858	1.898	0.094	1.604	1.681	1.593	0.095	1.912	2.051	1.894	0.093	1.96	2.172	2.003	0.094	1.901	2.004	2.001	0.094	1.802	1.915	1.855
	1 day, 15:45:12	37	1.593	1.622	1.603	0.092	1.609	1.671	1.615	0.094	1.714	1.742	0.936	0.093	1.764	1.756	1.862	0.091	1.68	1.645	1.626	0.092	2.083	2.018	2.011	0.091	1.824	1.858	1.898	0.094	1.605	1.682	1.593	0.095	1.912	2.03	1.893	0.093	1.959	2.176	2.003	0.094	1.899	2.01	2.001	0.094	1.799	1.914	1.853
	1 day, 16:00:12	37	1.593	1.621	1.603	0.092	1.61	1.672	1.616	0.093	1.712	1.74	0.956	0.093	1.762	1.756	1.862	0.091	1.682	1.646	1.627	0.092	2.083	2.017	2.009	0.091	1.823	1.858	1.899	0.094	1.605	1.683	1.594	0.095	1.909	2.026	1.893	0.093	1.957	2.171	2.002	0.094	1.897	2.013	1.999	0.094	1.796	1.913	1.849
	1 day, 16:15:12	37	1.591	1.621	1.603	0.092	1.615	1.671	1.619	0.094	1.71	1.738	0.979	0.093	1.761	1.756	1.862	0.091	1.682	1.647	1.628	0.092	2.083	2.017	2.006	0.092	1.822	1.857	1.899	0.094	1.605	1.684	1.595	0.095	1.908	2.025	1.894	0.093	1.955	2.173	2.001	0.094	1.896	2.013	1.998	0.094	1.792	1.911	1.848
	1 day, 16:30:12	37	1.59	1.62	1.602	0.092	1.615	1.676	1.617	0.094	1.708	1.735	1.004	0.093	1.759	1.755	1.862	0.091	1.683	1.648	1.628	0.092	2.082	2.016	2.005	0.092	1.821	1.856	1.898	0.095	1.606	1.684	1.595	0.095	1.903	2.029	1.895	0.093	1.954	2.173	2.001	0.095	1.893	2.014	1.998	0.094	1.789	1.91	1.845
	1 day, 16:45:12	37	1.589	1.62	1.602	0.092	1.617	1.677	1.624	0.093	1.705	1.733	1.03	0.093	1.758	1.754	1.862	0.091	1.684	1.649	1.629	0.092	2.081	2.015	2.004	0.092	1.82	1.855	1.897	0.094	1.607	1.685	1.595	0.095	1.901	2.029	1.894	0.093	1.952	2.169	2	0.094	1.892	2.015	1.997	0.094	1.786	1.909	1.843
	1 day, 17:00:12	37	1.588	1.619	1.601	0.092	1.619	1.683	1.62	0.093	1.703	1.732	1.055	0.093	1.756	1.754	1.862	0.091	1.684	1.649	1.629	0.092	2.081	2.014	2.004	0.091	1.819	1.854	1.897	0.094	1.608	1.686	1.595	0.095	1.9	2.028	1.893	0.093	1.95	2.171	2	0.094	1.89	2.016	1.996	0.094	1.783	1.908	1.841
	1 day, 17:15:12	37	1.586	1.619	1.601	0.092	1.621	1.687	1.628	0.093	1.7	1.73	1.078	0.093	1.754	1.753	1.862	0.091	1.685	1.65	1.631	0.092	2.08	2.014	2.003	0.091	1.818	1.853	1.897	0.094	1.609	1.687	1.594	0.095	1.899	2.027	1.893	0.093	1.948	2.171	1.999	0.094	1.888	2.017	1.994	0.094	1.781	1.907	1.838
	1 day, 17:30:12	37	1.585	1.619	1.601	0.092	1.625	1.688	1.624	0.093	1.698	1.728	1.1	0.093	1.753	1.752	1.862	0.091	1.685	1.651	1.632	0.092	2.08	2.013	2.002	0.091	1.817	1.853	1.896	0.095	1.609	1.688	1.597	0.095	1.898	2.027	1.894	0.093	1.947	2.169	1.998	0.094	1.886	2.017	1.993	0.094	1.777	1.905	1.836
	1 day, 17:45:12	37	1.584	1.618	1.6	0.092	1.623	1.688	1.633	0.094	1.697	1.727	1.121	0.093	1.752	1.752	1.862	0.091	1.685	1.651	1.632	0.092	2.079	2.012	2.002	0.092	1.816	1.852	1.896	0.094	1.609	1.688	1.596	0.095	1.898	2.026	1.895	0.093	1.945	2.168	1.998	0.094	1.884	2.016	1.992	0.094	1.775	1.904	1.834
	1 day, 18:00:12	37	1.583	1.618	1.6	0.092	1.626	1.695	1.625	0.094	1.695	1.725	1.141	0.093	1.75	1.751	1.862	0.091	1.686	1.652	1.632	0.092	2.079	2.01	2.001	0.092	1.815	1.851	1.895	0.095	1.611	1.689	1.598	0.095	1.897	2.025	1.894	0.093	1.944	2.168	1.998	0.095	1.882	2.015	1.991	0.094	1.772	1.903	1.831
	1 day, 18:15:12	37	1.581	1.617	1.599	0.092	1.626	1.698	1.633	0.093	1.693	1.724	1.161	0.093	1.748	1.751	1.862	0.091	1.686	1.653	1.633	0.092	2.078	2.009	2	0.092	1.814	1.85	1.895	0.094	1.611	1.689	1.596	0.095	1.895	2.021	1.893	0.093	1.942	2.165	1.997	0.094	1.88	2.016	1.99	0.094	1.769	1.901	1.829
	1 day, 18:30:12	37	1.58	1.616	1.599	0.092	1.631	1.697	1.624	0.094	1.691	1.723	1.179	0.093	1.747	1.75	1.862	0.091	1.686	1.653	1.633	0.092	2.077	2.008	2	0.092	1.813	1.849	1.895	0.094	1.611	1.69	1.598	0.095	1.893	2.018	1.893	0.093	1.94	2.163	1.996	0.094	1.878	2.016	1.989	0.094	1.768	1.9	1.827
	1 day, 18:45:12	37	1.579	1.616	1.598	0.092	1.629	1.703	1.633	0.093	1.689	1.722	1.197	0.093	1.745	1.749	1.862	0.091	1.686	1.654	1.634	0.092	2.077	2.007	1.998	0.091	1.812	1.847	1.894	0.094	1.611	1.691	1.598	0.095	1.892	2.015	1.892	0.093	1.938	2.165	1.996	0.095	1.876	2.014	1.989	0.094	1.765	1.898	1.825
	1 day, 19:00:12	37	1.578	1.615	1.598	0.092	1.629	1.699	1.624	0.094	1.686	1.721	1.212	0.093	1.744	1.749	1.862	0.091	1.687	1.655	1.635	0.092	2.075	2.006	1.996	0.092	1.811	1.847	1.893	0.094	1.612	1.692	1.599	0.095	1.889	2.018	1.892	0.093	1.936	2.159	1.995	0.094	1.874	2.014	1.987	0.094	1.763	1.897	1.823
	1 day, 19:15:12	37	1.576	1.614	1.597	0.092	1.629	1.703	1.631	0.094	1.684	1.72	1.226	0.093	1.742	1.748	1.862	0.091	1.687	1.656	1.634	0.092	2.074	2.005	1.996	0.092	1.81	1.845	1.893	0.094	1.613	1.693	1.6	0.095	1.884	2.018	1.891	0.093	1.934	2.163	1.994	0.095	1.872	2.012	1.986	0.094	1.762	1.896	1.821
	1 day, 19:30:12	37	1.575	1.613	1.597	0.092	1.627	1.698	1.623	0.094	1.681	1.72	1.237	0.093	1.741	1.748	1.861	0.091	1.688	1.656	1.635	0.092	2.073	2.004	1.995	0.092	1.809	1.844	1.892	0.094	1.613	1.693	1.599	0.095	1.88	2.019	1.89	0.093	1.933	2.159	1.994	0.094	1.87	2.011	1.985	0.094	1.759	1.894	1.819
	1 day, 19:45:12	37	1.574	1.613	1.596	0.092	1.629	1.701	1.628	0.094	1.679	1.72	1.248	0.093	1.74	1.747	1.862	0.091	1.688	1.657	1.635	0.092	2.072	2.003	1.994	0.092	1.808	1.844	1.892	0.094	1.614	1.694	1.601	0.095	1.879	2.019	1.889	0.093	1.931	2.16	1.993	0.094	1.868	2.01	1.984	0.094	1.757	1.893	1.817
	1 day, 20:00:12	37	1.572	1.612	1.596	0.092	1.628	1.696	1.622	0.093	1.677	1.718	1.256	0.093	1.738	1.746	1.861	0.091	1.688	1.657	1.636	0.092	2.069	2.002	1.993	0.092	1.807	1.843	1.891	0.094	1.614	1.695	1.599	0.095	1.87	2.019	1.888	0.093	1.929	2.157	1.993	0.095	1.866	2.008	1.983	0.094	1.756	1.891	1.814
	1 day, 20:15:12	37	1.57	1.612	1.595	0.092	1.628	1.702	1.621	0.093	1.674	1.716	1.263	0.093	1.736	1.746	1.861	0.091	1.688	1.658	1.636	0.092	2.068	2	1.992	0.092	1.806	1.842	1.891	0.094	1.615	1.695	1.601	0.095	1.864	2.017	1.887	0.093	1.927	2.156	1.992	0.094	1.864	2.007	1.982	0.094	1.753	1.89	1.813
	1 day, 20:30:12	37	1.569	1.611	1.595	0.092	1.628	1.696	1.617	0.093	1.672	1.715	1.269	0.093	1.735	1.745	1.861	0.091	1.689	1.658	1.637	0.092	2.065	2	1.991	0.092	1.805	1.841	1.89	0.094	1.616	1.696	1.601	0.095	1.869	2.017	1.885	0.093	1.926	2.155	1.992	0.095	1.862	2.006	1.982	0.094	1.752	1.889	1.811
	1 day, 20:45:12	36.9	1.568	1.61	1.594	0.092	1.629	1.699	1.617	0.093	1.67	1.714	1.272	0.093	1.733	1.744	1.861	0.091	1.689	1.658	1.637	0.092	2.063	1.997	1.989	0.091	1.804	1.841	1.889	0.094	1.616	1.696	1.602	0.095	1.857	2.015	1.884	0.093	1.923	2.155	1.991	0.094	1.861	2.005	1.98	0.094	1.75	1.887	1.808
	1 day, 21:00:12	37	1.566	1.609	1.594	0.092	1.632	1.694	1.615	0.094	1.667	1.713	1.276	0.093	1.732	1.743	1.861	0.091	1.69	1.66	1.638	0.092	2.062	1.996	1.987	0.092	1.803	1.84	1.889	0.094	1.617	1.697	1.603	0.095	1.854	2.013	1.883	0.093	1.922	2.153	1.99	0.094	1.859	2.003	1.979	0.094	1.747	1.886	1.807
	1 day, 21:15:12	37	1.565	1.609	1.593	0.092	1.628	1.692	1.612	0.093	1.665	1.713	1.276	0.093	1.73	1.742	1.861	0.091	1.691	1.66	1.638	0.092	2.059	1.994	1.984	0.092	1.802	1.839	1.888	0.095	1.618	1.698	1.602	0.095	1.851	2.013	1.881	0.093	1.92	2.154	1.99	0.094	1.856	2.002	1.978	0.094	1.746	1.884	1.805
	1 day, 21:30:12	37	1.563	1.608	1.593	0.092	1.637	1.69	1.61	0.093	1.663	1.712	1.277	0.093	1.729	1.742	1.86	0.091	1.691	1.661	1.639	0.092	2.058	1.993	1.983	0.092	1.8	1.838	1.888	0.094	1.619	1.698	1.603	0.095	1.846	2.012	1.88	0.093	1.919	2.152	1.99	0.094	1.854	2.001	1.977	0.094	1.744	1.883	1.803
	1 day, 21:45:12	37	1.561	1.607	1.592	0.092	1.624	1.685	1.607	0.093	1.662	1.712	1.277	0.093	1.727	1.741	1.86	0.091	1.691	1.661	1.639	0.092	2.057	1.992	1.982	0.092	1.8	1.838	1.888	0.094	1.619	1.699	1.602	0.095	1.839	2.011	1.879	0.093	1.917	2.15	1.989	0.094	1.853	1.998	1.976	0.094	1.742	1.881	1.801
	1 day, 22:00:12	37	1.56	1.606	1.591	0.092	1.63	1.686	1.602	0.094	1.661	1.711	1.276	0.093	1.726	1.74	1.86	0.091	1.691	1.663	1.639	0.092	2.056	1.99	1.98	0.092	1.798	1.837	1.887	0.094	1.62	1.7	1.605	0.095	1.836	2.009	1.879	0.093	1.915	2.152	1.988	0.095	1.851	1.997	1.975	0.094	1.74	1.88	1.799
	1 day, 22:15:12	37	1.558	1.605	1.59	0.092	1.62	1.683	1.603	0.093	1.659	1.71	1.274	0.093	1.724	1.739	1.86	0.091	1.691	1.663	1.64	0.092	2.055	1.987	1.978	0.092	1.797	1.837	1.886	0.094	1.621	1.7	1.604	0.095	1.837	2.008	1.877	0.093	1.913	2.148	1.987	0.094	1.849	1.995	1.974	0.094	1.738	1.878	1.797
	1 day, 22:30:12	37	1.556	1.605	1.59	0.092	1.625	1.68	1.596	0.093	1.657	1.709	1.272	0.093	1.723	1.739	1.859	0.091	1.691	1.664	1.64	0.092	2.054	1.985	1.974	0.092	1.796	1.835	1.885	0.094	1.622	1.701	1.605	0.095	1.839	2.007	1.876	0.093	1.911	2.15	1.986	0.094	1.847	1.994	1.973	0.094	1.737	1.877	1.795
	1 day, 22:45:12	36.9	1.554	1.604	1.589	0.092	1.618	1.676	1.597	0.093	1.655	1.707	1.269	0.093	1.721	1.738	1.859	0.091	1.692	1.664	1.64	0.092	2.054	1.984	1.973	0.092	1.795	1.835	1.885	0.094	1.622	1.701	1.607	0.095	1.835	2.007	1.875	0.093	1.909	2.148	1.986	0.094	1.845	1.991	1.972	0.094	1.735	1.875	1.793
	1 day, 23:00:12	37	1.553	1.603	1.588	0.092	1.619	1.671	1.596	0.093	1.652	1.706	1.266	0.093	1.72	1.737	1.859	0.091	1.692	1.665	1.64	0.092	2.053	1.982	1.971	0.092	1.794	1.834	1.884	0.094	1.623	1.701	1.605	0.095	1.833	2.007	1.874	0.093	1.908	2.143	1.986	0.094	1.843	1.991	1.971	0.094	1.733	1.874	1.791
	1 day, 23:15:12	37	1.551	1.603	1.588	0.092	1.613	1.675	1.593	0.093	1.651	1.705	1.263	0.093	1.718	1.736	1.858	0.091	1.693	1.665	1.641	0.092	2.053	1.981	1.97	0.092	1.793	1.833	1.883	0.094	1.623	1.702	1.607	0.095	1.828	2.007	1.873	0.093	1.906	2.147	1.985	0.094	1.842	1.989	1.97	0.094	1.732	1.872	1.789
	1 day, 23:30:12	37	1.55	1.602	1.587	0.092	1.613	1.669	1.592	0.093	1.649	1.704	1.259	0.093	1.717	1.735	1.858	0.091	1.693	1.666	1.641	0.092	2.055	1.979	1.968	0.092	1.791	1.832	1.882	0.094	1.623	1.702	1.606	0.095	1.823	2.006	1.873	0.092	1.904	2.146	1.984	0.094	1.839	1.988	1.969	0.094	1.73	1.871	1.787
	1 day, 23:45:12	37	1.548	1.601	1.587	0.092	1.614	1.668	1.59	0.093	1.647	1.704	1.256	0.093	1.715	1.734	1.858	0.091	1.693	1.666	1.641	0.092	2.054	1.976	1.966	0.092	1.79	1.831	1.883	0.094	1.624	1.703	1.606	0.095	1.82	2.003	1.871	0.093	1.902	2.143	1.983	0.094	1.838	1.986	1.968	0.094	1.729	1.869	1.784
	2 days, 0:00:12	37	1.546	1.601	1.586	0.092	1.61	1.672	1.591	0.093	1.645	1.704	1.252	0.093	1.714	1.733	1.857	0.091	1.694	1.667	1.641	0.092	2.053	1.972	1.965	0.092	1.789	1.83	1.882	0.094	1.625	1.704	1.609	0.095	1.814	2.002	1.87	0.093	1.9	2.144	1.983	0.094	1.836	1.985	1.967	0.094	1.728	1.868	1.783
	2 days, 0:15:12	36.9	1.545	1.6	1.585	0.092	1.609	1.671	1.587	0.093	1.643	1.703	1.249	0.093	1.712	1.733	1.857	0.091	1.694	1.668	1.642	0.092	2.053	1.97	1.965	0.092	1.788	1.829	1.882	0.094	1.625	1.704	1.608	0.095	1.812	2	1.869	0.093	1.898	2.141	1.982	0.094	1.834	1.983	1.966	0.094	1.726	1.867	1.781
	2 days, 0:30:12	37	1.543	1.599	1.585	0.092	1.607	1.672	1.587	0.093	1.641	1.701	1.246	0.093	1.711	1.731	1.856	0.091	1.694	1.668	1.642	0.092	2.053	1.966	1.963	0.092	1.787	1.828	1.881	0.094	1.625	1.704	1.609	0.095	1.806	2	1.868	0.093	1.896	2.138	1.982	0.094	1.833	1.982	1.964	0.094	1.724	1.865	1.779
	2 days, 0:45:12	37	1.542	1.599	1.584	0.092	1.607	1.672	1.585	0.094	1.639	1.7	1.243	0.093	1.71	1.73	1.856	0.091	1.695	1.668	1.643	0.092	2.052	1.967	1.962	0.092	1.786	1.828	1.88	0.094	1.626	1.705	1.61	0.095	1.799	1.996	1.867	0.093	1.894	2.14	1.981	0.094	1.831	1.98	1.964	0.094	1.723	1.864	1.777
	2 days, 1:00:12	37.1	1.54	1.598	1.583	0.092	1.603	1.67	1.581	0.093	1.637	1.701	1.239	0.093	1.708	1.73	1.855	0.091	1.695	1.67	1.642	0.092	2.052	1.965	1.961	0.092	1.784	1.827	1.88	0.094	1.626	1.705	1.609	0.095	1.789	1.992	1.866	0.093	1.893	2.138	1.98	0.094	1.828	1.978	1.963	0.094	1.722	1.862	1.776
	2 days, 1:15:12	37	1.538	1.597	1.582	0.092	1.601	1.671	1.578	0.093	1.635	1.7	1.236	0.093	1.706	1.729	1.855	0.091	1.695	1.669	1.643	0.092	2.051	1.963	1.96	0.092	1.783	1.827	1.879	0.094	1.627	1.706	1.61	0.095	1.784	1.988	1.865	0.093	1.891	2.139	1.98	0.094	1.825	1.977	1.961	0.094	1.721	1.861	1.774
	2 days, 1:30:12	37	1.537	1.597	1.581	0.092	1.602	1.67	1.579	0.093	1.634	1.698	1.232	0.093	1.705	1.728	1.854	0.091	1.696	1.67	1.642	0.092	2.051	1.96	1.96	0.092	1.782	1.826	1.878	0.094	1.627	1.706	1.612	0.095	1.78	1.982	1.864	0.093	1.889	2.137	1.979	0.094	1.823	1.975	1.96	0.094	1.719	1.859	1.772
	2 days, 1:45:12	37	1.535	1.596	1.581	0.092	1.601	1.667	1.574	0.094	1.632	1.697	1.229	0.093	1.703	1.727	1.854	0.091	1.696	1.67	1.642	0.092	2.05	1.958	1.958	0.092	1.781	1.825	1.878	0.094	1.628	1.706	1.611	0.095	1.776	1.978	1.863	0.093	1.887	2.137	1.978	0.094	1.821	1.973	1.959	0.094	1.718	1.858	1.77
	2 days, 2:00:12	37	1.534	1.595	1.58	0.092	1.602	1.663	1.572	0.093	1.63	1.696	1.226	0.093	1.702	1.726	1.853	0.091	1.697	1.671	1.643	0.092	2.05	1.955	1.958	0.092	1.78	1.824	1.877	0.094	1.628	1.707	1.612	0.095	1.77	1.974	1.861	0.093	1.885	2.132	1.977	0.094	1.819	1.971	1.958	0.094	1.716	1.856	1.768
	2 days, 2:15:12	36.9	1.533	1.594	1.579	0.092	1.602	1.662	1.572	0.093	1.629	1.694	1.222	0.093	1.7	1.725	1.853	0.091	1.697	1.67	1.641	0.092	2.048	1.951	1.957	0.092	1.778	1.824	1.876	0.094	1.628	1.707	1.612	0.095	1.766	1.967	1.86	0.093	1.883	2.132	1.977	0.094	1.817	1.97	1.957	0.094	1.716	1.855	1.766
	2 days, 2:30:12	37	1.531	1.594	1.578	0.092	1.603	1.661	1.573	0.093	1.627	1.693	1.22	0.093	1.699	1.724	1.852	0.091	1.698	1.671	1.641	0.092	2.047	1.948	1.956	0.092	1.777	1.823	1.875	0.094	1.629	1.707	1.612	0.095	1.761	1.964	1.859	0.093	1.881	2.131	1.976	0.094	1.815	1.967	1.956	0.094	1.714	1.853	1.764
	2 days, 2:45:12	37	1.53	1.593	1.577	0.092	1.604	1.66	1.574	0.093	1.625	1.692	1.216	0.093	1.697	1.722	1.851	0.091	1.698	1.671	1.64	0.092	2.047	1.946	1.955	0.092	1.776	1.822	1.874	0.094	1.629	1.708	1.613	0.095	1.76	1.96	1.857	0.093	1.879	2.133	1.975	0.094	1.812	1.967	1.954	0.094	1.713	1.852	1.762
	2 days, 3:00:12	37	1.529	1.592	1.577	0.092	1.605	1.659	1.571	0.093	1.623	1.691	1.213	0.093	1.696	1.722	1.851	0.091	1.698	1.671	1.637	0.092	2.046	1.944	1.956	0.091	1.774	1.822	1.873	0.094	1.629	1.708	1.613	0.095	1.759	1.959	1.856	0.092	1.877	2.128	1.974	0.094	1.81	1.964	1.954	0.094	1.712	1.851	1.76
	2 days, 3:15:12	37	1.528	1.592	1.576	0.092	1.605	1.659	1.571	0.093	1.622	1.692	1.21	0.093	1.694	1.721	1.85	0.091	1.698	1.67	1.635	0.092	2.046	1.939	1.954	0.092	1.773	1.821	1.872	0.094	1.629	1.708	1.614	0.095	1.758	1.957	1.855	0.093	1.876	2.13	1.974	0.094	1.808	1.963	1.952	0.094	1.71	1.849	1.759
	2 days, 3:30:12	37	1.526	1.591	1.575	0.092	1.604	1.656	1.568	0.093	1.62	1.691	1.207	0.093	1.693	1.72	1.85	0.091	1.698	1.671	1.634	0.092	2.045	1.938	1.952	0.092	1.772	1.821	1.872	0.094	1.63	1.708	1.614	0.095	1.757	1.955	1.853	0.093	1.874	2.131	1.973	0.094	1.806	1.962	1.952	0.094	1.71	1.848	1.757
	2 days, 3:45:12	37	1.525	1.59	1.574	0.092	1.604	1.654	1.567	0.093	1.618	1.689	1.204	0.093	1.691	1.719	1.849	0.091	1.699	1.671	1.631	0.092	2.046	1.937	1.95	0.092	1.771	1.82	1.871	0.094	1.63	1.707	1.614	0.095	1.754	1.953	1.852	0.093	1.872	2.129	1.972	0.094	1.804	1.96	1.95	0.094	1.708	1.846	1.755
	2 days, 4:00:12	37	1.523	1.589	1.574	0.092	1.603	1.652	1.573	0.093	1.616	1.688	1.202	0.093	1.69	1.718	1.848	0.091	1.699	1.671	1.628	0.092	2.045	1.936	1.949	0.092	1.77	1.819	1.87	0.094	1.63	1.707	1.615	0.095	1.752	1.953	1.85	0.093	1.87	2.128	1.972	0.094	1.802	1.958	1.949	0.094	1.707	1.845	1.753
	2 days, 4:15:12	37	1.522	1.589	1.573	0.092	1.6	1.653	1.576	0.093	1.614	1.687	1.198	0.093	1.688	1.717	1.848	0.091	1.699	1.671	1.627	0.092	2.044	1.937	1.948	0.092	1.768	1.818	1.87	0.094	1.63	1.706	1.615	0.095	1.752	1.951	1.849	0.093	1.868	2.128	1.97	0.094	1.8	1.957	1.948	0.094	1.706	1.843	1.751
	2 days, 4:30:12	37	1.52	1.588	1.572	0.092	1.598	1.657	1.581	0.093	1.612	1.686	1.194	0.093	1.687	1.716	1.847	0.091	1.699	1.669	1.626	0.092	2.044	1.937	1.946	0.092	1.767	1.818	1.869	0.094	1.63	1.705	1.616	0.095	1.75	1.95	1.847	0.093	1.866	2.127	1.97	0.094	1.798	1.955	1.947	0.094	1.705	1.842	1.749
	2 days, 4:45:12	37	1.519	1.587	1.571	0.092	1.598	1.66	1.6	0.093	1.61	1.685	1.191	0.093	1.685	1.715	1.846	0.091	1.7	1.668	1.626	0.092	2.044	1.936	1.945	0.092	1.766	1.817	1.868	0.094	1.631	1.703	1.617	0.095	1.747	1.947	1.846	0.093	1.864	2.126	1.969	0.094	1.796	1.954	1.946	0.094	1.704	1.841	1.747
	2 days, 5:00:12	37	1.517	1.586	1.571	0.092	1.595	1.662	1.62	0.093	1.609	1.685	1.188	0.093	1.685	1.714	1.846	0.091	1.7	1.665	1.626	0.092	2.044	1.938	1.94	0.092	1.765	1.817	1.868	0.094	1.63	1.702	1.617	0.095	1.747	1.944	1.845	0.093	1.862	2.124	1.968	0.094	1.794	1.953	1.945	0.094	1.703	1.839	1.745
	2 days, 5:15:12	37	1.516	1.586	1.57	0.092	1.595	1.667	1.66	0.093	1.607	1.683	1.185	0.093	1.683	1.713	1.845	0.091	1.701	1.663	1.622	0.092	2.044	1.937	1.934	0.092	1.763	1.816	1.866	0.094	1.63	1.7	1.617	0.095	1.745	1.941	1.843	0.093	1.861	2.123	1.968	0.094	1.793	1.95	1.943	0.094	1.702	1.838	1.744
	2 days, 5:30:12	37	1.514	1.585	1.569	0.092	1.593	1.673	1.795	0.093	1.605	1.681	1.181	0.093	1.681	1.712	1.844	0.091	1.701	1.66	1.624	0.092	2.044	1.937	1.93	0.092	1.762	1.815	1.865	0.094	1.631	1.698	1.617	0.095	1.745	1.937	1.841	0.092	1.858	2.122	1.967	0.094	1.791	1.95	1.943	0.094	1.701	1.836	1.741
	2 days, 5:45:12	37	1.513	1.584	1.568	0.092	1.594	1.687	2.118	0.093	1.603	1.679	1.177	0.092	1.68	1.711	1.843	0.091	1.701	1.657	1.626	0.092	2.045	1.932	1.93	0.091	1.761	1.815	1.865	0.094	1.63	1.696	1.618	0.095	1.745	1.933	1.84	0.092	1.857	2.121	1.966	0.094	1.789	1.948	1.942	0.094	1.7	1.835	1.739
	2 days, 6:00:12	37	1.512	1.583	1.567	0.092	1.594	1.69	2.178	0.093	1.601	1.677	1.173	0.093	1.679	1.71	1.843	0.091	1.701	1.655	1.624	0.092	2.044	1.93	1.93	0.092	1.76	1.814	1.864	0.094	1.63	1.695	1.617	0.095	1.743	1.929	1.838	0.093	1.855	2.122	1.965	0.094	1.787	1.946	1.94	0.094	1.699	1.833	1.737
	2 days, 6:15:12	37	1.51	1.582	1.567	0.092	1.596	1.752	2.05	0.093	1.599	1.677	1.17	0.092	1.677	1.709	1.842	0.091	1.701	1.652	1.618	0.092	2.044	1.929	1.931	0.091	1.758	1.813	1.863	0.094	1.63	1.692	1.617	0.095	1.742	1.924	1.836	0.092	1.853	2.118	1.964	0.094	1.785	1.945	1.939	0.094	1.698	1.832	1.735
	2 days, 6:30:12	37	1.509	1.581	1.566	0.092	1.604	1.866	2.064	0.093	1.597	1.675	1.167	0.093	1.675	1.708	1.841	0.091	1.701	1.65	1.629	0.092	2.044	1.927	1.932	0.092	1.757	1.813	1.862	0.094	1.63	1.69	1.618	0.095	1.742	1.92	1.834	0.093	1.851	2.12	1.964	0.094	1.783	1.943	1.938	0.094	1.697	1.831	1.734
	2 days, 6:45:12	36.9	1.508	1.581	1.565	0.092	1.603	1.977	2.05	0.093	1.595	1.672	1.164	0.093	1.674	1.707	1.841	0.091	1.701	1.649	1.666	0.092	2.042	1.925	1.93	0.092	1.755	1.812	1.861	0.094	1.63	1.688	1.618	0.095	1.74	1.916	1.832	0.093	1.849	2.116	1.962	0.094	1.782	1.943	1.937	0.094	1.696	1.829	1.732
	2 days, 7:00:12	37	1.506	1.58	1.564	0.092	1.607	2.044	2.017	0.093	1.593	1.669	1.161	0.093	1.673	1.706	1.84	0.091	1.702	1.647	1.708	0.092	2.042	1.922	1.927	0.091	1.754	1.812	1.86	0.094	1.629	1.685	1.618	0.095	1.738	1.912	1.83	0.093	1.847	2.116	1.962	0.094	1.779	1.941	1.936	0.094	1.695	1.828	1.73
	2 days, 7:15:12	37	1.504	1.579	1.563	0.092	1.615	2.064	2.007	0.093	1.591	1.667	1.158	0.092	1.671	1.705	1.839	0.091	1.702	1.639	1.743	0.092	2.041	1.918	1.924	0.091	1.752	1.811	1.859	0.094	1.629	1.683	1.618	0.095	1.736	1.908	1.829	0.092	1.846	2.116	1.961	0.094	1.778	1.94	1.935	0.094	1.694	1.827	1.728
	2 days, 7:30:12	37	1.503	1.579	1.562	0.092	1.626	1.989	2.001	0.093	1.589	1.665	1.154	0.093	1.67	1.705	1.839	0.091	1.702	1.647	1.808	0.092	2.04	1.914	1.923	0.092	1.751	1.811	1.859	0.094	1.629	1.681	1.617	0.095	1.734	1.904	1.826	0.093	1.844	2.114	1.96	0.094	1.776	1.938	1.933	0.094	1.693	1.825	1.726
	2 days, 7:45:12	37	1.501	1.578	1.561	0.092	1.636	1.966	2.009	0.093	1.587	1.662	1.151	0.093	1.668	1.704	1.838	0.091	1.701	1.642	1.907	0.092	2.039	1.912	1.921	0.091	1.75	1.81	1.858	0.094	1.628	1.678	1.617	0.095	1.716	1.899	1.823	0.093	1.842	2.115	1.959	0.094	1.774	1.937	1.932	0.094	1.692	1.824	1.724
	2 days, 8:00:12	37	1.5	1.577	1.561	0.092	1.651	1.97	1.995	0.093	1.585	1.66	1.148	0.093	1.666	1.703	1.837	0.091	1.701	1.655	1.99	0.092	2.038	1.911	1.918	0.092	1.748	1.81	1.857	0.094	1.628	1.675	1.618	0.095	1.714	1.894	1.821	0.093	1.841	2.111	1.959	0.094	1.773	1.935	1.931	0.094	1.691	1.823	1.722
	2 days, 8:15:12	37	1.498	1.576	1.56	0.092	1.671	1.899	1.986	0.093	1.583	1.657	1.144	0.093	1.665	1.702	1.836	0.091	1.7	1.666	2.047	0.092	2.033	1.907	1.915	0.092	1.747	1.809	1.856	0.094	1.627	1.672	1.617	0.095	1.712	1.889	1.819	0.093	1.839	2.113	1.958	0.094	1.771	1.934	1.929	0.094	1.69	1.821	1.72
	2 days, 8:30:12	37	1.497	1.575	1.559	0.092	1.625	1.95	1.966	0.093	1.581	1.655	1.142	0.093	1.664	1.701	1.836	0.091	1.7	1.692	2.096	0.092	2.03	1.905	1.914	0.091	1.746	1.809	1.855	0.094	1.627	1.67	1.617	0.095	1.715	1.886	1.817	0.093	1.837	2.112	1.957	0.094	1.77	1.931	1.928	0.094	1.689	1.82	1.718
	2 days, 8:45:12	37.1	1.496	1.574	1.558	0.092	1.668	1.986	1.99	0.093	1.58	1.653	1.14	0.093	1.662	1.7	1.835	0.091	1.699	1.73	2.128	0.092	2.028	1.902	1.911	0.091	1.744	1.808	1.853	0.094	1.626	1.667	1.619	0.095	1.717	1.882	1.814	0.093	1.835	2.113	1.956	0.094	1.768	1.93	1.927	0.094	1.688	1.819	1.716
	2 days, 9:00:12	37	1.494	1.573	1.557	0.092	1.714	1.941	1.985	0.093	1.577	1.651	1.138	0.093	1.66	1.7	1.834	0.091	1.697	1.793	2.159	0.093	2.027	1.9	1.91	0.091	1.743	1.807	1.852	0.094	1.625	1.664	1.617	0.095	1.718	1.879	1.813	0.093	1.833	2.111	1.955	0.094	1.767	1.928	1.925	0.094	1.687	1.817	1.714
	2 days, 9:15:12	37	1.493	1.573	1.556	0.092	1.75	1.952	1.977	0.093	1.576	1.649	1.135	0.093	1.659	1.699	1.833	0.091	1.695	1.884	2.188	0.092	2.026	1.898	1.907	0.091	1.741	1.806	1.851	0.094	1.625	1.661	1.616	0.095	1.718	1.876	1.81	0.093	1.831	2.111	1.954	0.094	1.765	1.927	1.924	0.094	1.686	1.816	1.712
	2 days, 9:30:12	37	1.492	1.572	1.556	0.092	1.695	1.941	1.99	0.093	1.574	1.647	1.133	0.093	1.658	1.698	1.833	0.091	1.693	1.982	2.208	0.093	2.024	1.896	1.906	0.092	1.74	1.806	1.85	0.094	1.624	1.659	1.617	0.095	1.718	1.873	1.808	0.093	1.829	2.109	1.953	0.094	1.764	1.925	1.923	0.094	1.685	1.815	1.71
	2 days, 9:45:12	37	1.491	1.571	1.555	0.092	1.756	1.946	1.979	0.093	1.572	1.645	1.13	0.093	1.657	1.697	1.832	0.091	1.691	2.066	2.291	0.092	2.023	1.898	1.903	0.091	1.738	1.805	1.849	0.094	1.624	1.657	1.616	0.095	1.718	1.869	1.806	0.093	1.827	2.106	1.952	0.094	1.762	1.924	1.922	0.094	1.684	1.813	1.708
	2 days, 10:00:12	37	1.489	1.57	1.554	0.092	1.687	1.943	1.988	0.093	1.57	1.643	1.127	0.093	1.655	1.696	1.831	0.091	1.69	2.115	2.311	0.092	2.024	1.903	1.901	0.092	1.737	1.804	1.848	0.094	1.624	1.653	1.615	0.095	1.718	1.866	1.804	0.093	1.825	2.108	1.951	0.094	1.76	1.922	1.92	0.094	1.683	1.812	1.706
	2 days, 10:15:12	37	1.488	1.569	1.554	0.092	1.727	1.927	1.965	0.093	1.568	1.641	1.124	0.092	1.654	1.695	1.831	0.091	1.688	2.142	2.329	0.092	2.022	1.907	1.899	0.092	1.736	1.804	1.847	0.094	1.623	1.648	1.615	0.095	1.717	1.862	1.801	0.093	1.823	2.104	1.95	0.094	1.758	1.921	1.918	0.094	1.682	1.811	1.704
	2 days, 10:30:12	37	1.487	1.568	1.553	0.092	1.677	1.96	1.971	0.093	1.566	1.638	1.122	0.093	1.652	1.694	1.83	0.091	1.686	2.176	2.348	0.092	2.022	1.908	1.897	0.091	1.734	1.803	1.846	0.094	1.622	1.645	1.614	0.095	1.717	1.859	1.799	0.093	1.821	2.102	1.949	0.094	1.757	1.919	1.917	0.094	1.681	1.809	1.701
	2 days, 10:45:12	37	1.486	1.568	1.552	0.092	1.676	1.938	1.964	0.093	1.564	1.636	1.12	0.092	1.651	1.693	1.829	0.091	1.685	2.191	2.372	0.092	2.021	1.907	1.894	0.092	1.733	1.803	1.844	0.094	1.622	1.641	1.614	0.095	1.717	1.856	1.796	0.093	1.819	2.104	1.948	0.094	1.756	1.917	1.915	0.094	1.681	1.808	1.7
	2 days, 11:00:12	37	1.485	1.566	1.551	0.092	1.688	1.927	1.942	0.093	1.562	1.634	1.118	0.093	1.65	1.692	1.828	0.091	1.684	2.209	2.394	0.092	2.02	1.906	1.892	0.092	1.732	1.802	1.843	0.094	1.622	1.637	1.613	0.095	1.716	1.853	1.794	0.093	1.817	2.102	1.947	0.094	1.754	1.915	1.914	0.094	1.679	1.806	1.697
	2 days, 11:15:12	37	1.484	1.565	1.551	0.092	1.729	1.935	1.97	0.093	1.56	1.632	1.115	0.092	1.649	1.692	1.827	0.091	1.684	2.241	2.433	0.092	2.018	1.905	1.89	0.092	1.73	1.801	1.842	0.094	1.621	1.634	1.611	0.095	1.716	1.85	1.792	0.092	1.815	2.103	1.947	0.094	1.752	1.914	1.913	0.094	1.678	1.805	1.695
	2 days, 11:30:12	37	1.482	1.564	1.55	0.092	1.64	1.927	1.982	0.093	1.558	1.63	1.114	0.092	1.647	1.691	1.826	0.091	1.685	2.259	2.427	0.092	2.016	1.907	1.889	0.091	1.729	1.801	1.84	0.094	1.621	1.631	1.612	0.095	1.715	1.846	1.789	0.092	1.814	2.101	1.945	0.094	1.751	1.912	1.911	0.094	1.677	1.804	1.692
	2 days, 11:45:12	37	1.481	1.564	1.549	0.092	1.721	1.893	1.974	0.093	1.556	1.628	1.112	0.093	1.647	1.69	1.826	0.091	1.683	2.284	2.476	0.092	2.014	1.907	1.887	0.092	1.727	1.8	1.84	0.094	1.62	1.629	1.611	0.095	1.715	1.844	1.786	0.093	1.812	2.097	1.945	0.094	1.75	1.909	1.91	0.094	1.676	1.802	1.69
	2 days, 12:00:12	37	1.479	1.563	1.547	0.092	1.716	1.92	1.94	0.093	1.554	1.627	1.109	0.092	1.645	1.689	1.825	0.091	1.682	2.338	2.571	0.092	2.012	1.91	1.884	0.092	1.726	1.799	1.838	0.094	1.619	1.627	1.611	0.095	1.715	1.84	1.783	0.092	1.81	2.098	1.944	0.094	1.748	1.909	1.908	0.094	1.675	1.801	1.688
	2 days, 12:15:12	37	1.479	1.562	1.547	0.092	1.722	1.923	1.964	0.093	1.552	1.625	1.107	0.092	1.644	1.688	1.824	0.091	1.684	2.487	2.6	0.092	2.009	1.911	1.882	0.091	1.724	1.799	1.837	0.094	1.618	1.627	1.61	0.095	1.714	1.838	1.781	0.092	1.808	2.098	1.942	0.094	1.747	1.908	1.907	0.094	1.674	1.8	1.686
	2 days, 12:30:12	37	1.478	1.561	1.546	0.092	1.733	1.91	1.97	0.093	1.551	1.624	1.106	0.092	1.644	1.687	1.824	0.091	1.685	2.493	2.68	0.092	2.006	1.908	1.88	0.092	1.722	1.798	1.836	0.094	1.617	1.627	1.61	0.095	1.713	1.836	1.779	0.092	1.806	2.096	1.942	0.094	1.746	1.907	1.905	0.094	1.674	1.799	1.683
	2 days, 12:45:12	37	1.478	1.56	1.545	0.092	1.683	1.901	1.957	0.093	1.549	1.623	1.104	0.092	1.643	1.686	1.823	0.091	1.686	2.516	2.713	0.092	2.005	1.905	1.878	0.092	1.721	1.797	1.835	0.094	1.615	1.625	1.61	0.095	1.712	1.833	1.776	0.093	1.805	2.094	1.941	0.094	1.744	1.904	1.905	0.094	1.673	1.798	1.681
	2 days, 13:00:12	37	1.477	1.559	1.544	0.092	1.722	1.931	1.946	0.093	1.548	1.62	1.103	0.092	1.641	1.686	1.822	0.091	1.687	2.532	2.751	0.092	2.002	1.903	1.876	0.091	1.719	1.796	1.834	0.094	1.614	1.625	1.609	0.095	1.712	1.829	1.774	0.093	1.803	2.095	1.94	0.094	1.743	1.903	1.902	0.094	1.672	1.797	1.679
	2 days, 13:15:12	37	1.476	1.558	1.543	0.092	1.709	1.943	1.967	0.093	1.546	1.618	1.101	0.093	1.641	1.685	1.821	0.091	1.689	2.55	2.771	0.092	1.999	1.901	1.874	0.091	1.718	1.795	1.832	0.094	1.613	1.626	1.61	0.095	1.711	1.827	1.772	0.093	1.801	2.095	1.939	0.094	1.742	1.902	1.901	0.094	1.672	1.795	1.677
	2 days, 13:30:12	37	1.476	1.557	1.542	0.092	1.727	1.919	1.965	0.093	1.544	1.616	1.1	0.092	1.64	1.684	1.82	0.091	1.695	2.558	2.755	0.092	1.995	1.898	1.872	0.091	1.716	1.795	1.832	0.094	1.612	1.626	1.61	0.095	1.71	1.823	1.768	0.092	1.799	2.091	1.937	0.094	1.74	1.901	1.899	0.094	1.671	1.794	1.675
	2 days, 13:45:12	37	1.475	1.556	1.542	0.092	1.723	1.902	1.972	0.093	1.542	1.614	1.098	0.092	1.639	1.683	1.819	0.091	1.713	2.619	2.832	0.092	1.992	1.896	1.87	0.091	1.715	1.794	1.831	0.094	1.611	1.627	1.61	0.095	1.709	1.821	1.766	0.092	1.797	2.094	1.937	0.094	1.739	1.9	1.898	0.094	1.67	1.793	1.672
	2 days, 14:00:12	37	1.474	1.555	1.541	0.092	1.723	1.896	1.942	0.093	1.541	1.612	1.097	0.092	1.638	1.682	1.818	0.091	1.762	2.632	2.786	0.092	1.983	1.894	1.868	0.091	1.713	1.793	1.829	0.094	1.61	1.628	1.609	0.095	1.708	1.818	1.763	0.092	1.795	2.09	1.935	0.094	1.737	1.899	1.896	0.094	1.669	1.792	1.67
	2 days, 14:15:12	37	1.473	1.555	1.54	0.092	1.719	1.922	1.953	0.093	1.539	1.609	1.095	0.092	1.637	1.681	1.817	0.091	1.829	2.655	2.596	0.092	1.98	1.893	1.867	0.091	1.712	1.792	1.828	0.094	1.609	1.629	1.608	0.095	1.707	1.815	1.761	0.092	1.793	2.092	1.935	0.094	1.736	1.898	1.895	0.094	1.668	1.79	1.668
	2 days, 14:30:12	37	1.472	1.554	1.54	0.092	1.728	1.896	1.947	0.093	1.537	1.607	1.094	0.092	1.636	1.681	1.816	0.091	1.888	2.689	2.467	0.092	1.977	1.89	1.865	0.091	1.71	1.791	1.826	0.094	1.608	1.631	1.607	0.095	1.706	1.812	1.758	0.092	1.791	2.089	1.933	0.094	1.735	1.895	1.893	0.094	1.666	1.789	1.666
	2 days, 14:45:12	37	1.471	1.553	1.539	0.092	1.72	1.93	1.936	0.093	1.536	1.605	1.093	0.092	1.635	1.679	1.815	0.091	1.937	2.719	2.461	0.092	1.976	1.889	1.863	0.091	1.709	1.79	1.825	0.094	1.608	1.635	1.606	0.095	1.705	1.81	1.756	0.092	1.789	2.089	1.933	0.094	1.734	1.894	1.891	0.094	1.665	1.788	1.664
	2 days, 15:00:12	37	1.47	1.552	1.538	0.092	1.724	1.938	1.943	0.093	1.534	1.604	1.092	0.092	1.634	1.679	1.815	0.091	1.972	2.707	2.452	0.092	1.974	1.887	1.861	0.092	1.707	1.79	1.824	0.094	1.606	1.636	1.605	0.095	1.704	1.808	1.753	0.093	1.787	2.088	1.932	0.094	1.733	1.893	1.889	0.094	1.665	1.787	1.661
	2 days, 15:15:12	37	1.469	1.551	1.537	0.092	1.723	1.917	1.937	0.093	1.532	1.603	1.091	0.092	1.633	1.678	1.813	0.091	2.006	2.77	2.414	0.092	1.973	1.886	1.859	0.091	1.706	1.789	1.823	0.094	1.605	1.639	1.606	0.095	1.703	1.806	1.75	0.093	1.785	2.084	1.93	0.094	1.731	1.89	1.887	0.094	1.664	1.785	1.66
	2 days, 15:30:12	37	1.468	1.55	1.536	0.092	1.725	1.919	1.92	0.093	1.53	1.602	1.09	0.092	1.633	1.677	1.812	0.091	2.03	2.803	2.383	0.092	1.973	1.884	1.858	0.091	1.704	1.788	1.822	0.094	1.603	1.642	1.606	0.095	1.702	1.803	1.747	0.092	1.783	2.082	1.929	0.094	1.73	1.889	1.886	0.094	1.662	1.784	1.658
	2 days, 15:45:12	37	1.468	1.55	1.536	0.092	1.721	1.908	1.952	0.093	1.528	1.599	1.088	0.092	1.631	1.676	1.811	0.091	2.062	2.769	2.412	0.092	1.972	1.883	1.856	0.091	1.703	1.787	1.82	0.094	1.602	1.642	1.606	0.095	1.701	1.8	1.745	0.092	1.781	2.085	1.928	0.094	1.729	1.888	1.884	0.094	1.661	1.782	1.656
	2 days, 16:00:12	37	1.466	1.549	1.535	0.092	1.725	1.891	1.945	0.093	1.527	1.597	1.088	0.092	1.63	1.675	1.81	0.091	2.104	2.796	2.391	0.092	1.971	1.881	1.855	0.091	1.702	1.787	1.819	0.094	1.6	1.649	1.608	0.095	1.7	1.798	1.742	0.093	1.779	2.083	1.927	0.094	1.728	1.887	1.882	0.094	1.661	1.781	1.655
	2 days, 16:15:12	37	1.466	1.548	1.534	0.092	1.721	1.926	1.931	0.093	1.525	1.595	1.087	0.092	1.629	1.674	1.809	0.091	2.141	2.771	2.376	0.092	1.97	1.88	1.853	0.091	1.7	1.786	1.817	0.094	1.597	1.652	1.609	0.095	1.7	1.795	1.74	0.092	1.777	2.082	1.926	0.094	1.726	1.885	1.881	0.094	1.659	1.78	1.653
	2 days, 16:30:12	37	1.465	1.548	1.534	0.092	1.722	1.903	1.928	0.093	1.524	1.592	1.085	0.092	1.628	1.673	1.808	0.091	2.174	2.743	2.387	0.092	1.969	1.877	1.852	0.091	1.698	1.785	1.816	0.094	1.595	1.658	1.61	0.095	1.698	1.792	1.737	0.092	1.775	2.08	1.925	0.094	1.725	1.883	1.879	0.094	1.659	1.778	1.651
	2 days, 16:45:12	37	1.464	1.547	1.533	0.092	1.714	1.904	1.944	0.093	1.522	1.59	1.083	0.092	1.627	1.673	1.806	0.091	2.207	2.746	2.384	0.092	1.968	1.875	1.85	0.091	1.697	1.784	1.813	0.094	1.593	1.658	1.614	0.095	1.697	1.79	1.734	0.092	1.774	2.08	1.924	0.094	1.724	1.882	1.877	0.094	1.657	1.777	1.649
	2 days, 17:00:12	37	1.464	1.546	1.533	0.092	1.726	1.909	1.937	0.093	1.52	1.587	1.082	0.092	1.626	1.672	1.806	0.091	2.238	2.725	2.368	0.092	1.967	1.874	1.848	0.092	1.695	1.783	1.813	0.094	1.59	1.657	1.619	0.095	1.696	1.788	1.732	0.092	1.772	2.077	1.923	0.094	1.723	1.881	1.875	0.094	1.657	1.776	1.647
	2 days, 17:15:12	37	1.463	1.545	1.532	0.092	1.716	1.915	1.941	0.093	1.518	1.584	1.08	0.092	1.625	1.671	1.804	0.091	2.248	2.562	2.329	0.092	1.966	1.871	1.846	0.092	1.694	1.782	1.811	0.094	1.591	1.658	1.631	0.095	1.695	1.785	1.729	0.092	1.77	2.079	1.922	0.094	1.721	1.879	1.873	0.094	1.655	1.774	1.646
	2 days, 17:30:12	37	1.463	1.545	1.531	0.092	1.723	1.892	1.942	0.093	1.516	1.581	1.079	0.092	1.624	1.67	1.803	0.091	2.264	2.503	2.345	0.092	1.966	1.87	1.845	0.091	1.692	1.781	1.809	0.093	1.59	1.661	1.643	0.094	1.694	1.783	1.726	0.092	1.768	2.074	1.921	0.094	1.72	1.879	1.872	0.094	1.655	1.773	1.644
	2 days, 17:45:12	37	1.462	1.544	1.53	0.092	1.709	1.895	1.941	0.093	1.514	1.577	1.078	0.092	1.623	1.669	1.802	0.091	2.286	2.557	2.349	0.092	1.964	1.869	1.843	0.091	1.69	1.78	1.808	0.094	1.589	1.668	1.661	0.095	1.693	1.781	1.724	0.092	1.766	2.075	1.92	0.094	1.719	1.876	1.869	0.094	1.653	1.771	1.642
	2 days, 18:00:12	37	1.462	1.543	1.529	0.092	1.723	1.91	1.908	0.093	1.512	1.574	1.077	0.092	1.622	1.668	1.801	0.091	2.3	2.538	2.329	0.092	1.962	1.868	1.841	0.091	1.689	1.78	1.807	0.094	1.589	1.66	1.681	0.095	1.692	1.78	1.721	0.092	1.765	2.072	1.919	0.094	1.718	1.874	1.868	0.094	1.653	1.77	1.641
	2 days, 18:15:12	37	1.461	1.543	1.528	0.092	1.705	1.887	1.914	0.093	1.511	1.571	1.076	0.092	1.621	1.668	1.8	0.091	2.33	2.538	2.323	0.092	1.96	1.867	1.839	0.091	1.688	1.779	1.805	0.094	1.59	1.66	1.704	0.095	1.69	1.777	1.718	0.092	1.763	2.071	1.918	0.094	1.717	1.873	1.866	0.094	1.652	1.769	1.639
	2 days, 18:30:12	37	1.46	1.541	1.528	0.092	1.718	1.898	1.914	0.093	1.508	1.567	1.075	0.092	1.62	1.667	1.799	0.091	2.355	2.499	2.341	0.092	1.958	1.865	1.838	0.091	1.686	1.778	1.804	0.094	1.589	1.664	1.74	0.095	1.689	1.775	1.716	0.092	1.761	2.068	1.917	0.094	1.716	1.873	1.863	0.094	1.65	1.767	1.638
	2 days, 18:45:12	37	1.459	1.54	1.526	0.092	1.703	1.891	1.925	0.093	1.506	1.564	1.074	0.092	1.619	1.666	1.798	0.091	2.387	2.491	2.332	0.092	1.958	1.866	1.836	0.091	1.685	1.777	1.801	0.093	1.59	1.667	1.763	0.094	1.687	1.773	1.712	0.092	1.758	2.07	1.916	0.094	1.715	1.871	1.862	0.094	1.649	1.766	1.636
	2 days, 19:00:12	36.9	1.459	1.539	1.526	0.092	1.714	1.876	1.908	0.093	1.505	1.56	1.074	0.092	1.618	1.666	1.797	0.091	2.419	2.481	2.328	0.092	1.955	1.865	1.834	0.091	1.683	1.776	1.801	0.094	1.589	1.668	1.81	0.095	1.686	1.771	1.709	0.092	1.757	2.065	1.915	0.094	1.714	1.869	1.86	0.094	1.648	1.765	1.635
	2 days, 19:15:12	37	1.458	1.538	1.525	0.092	1.7	1.913	1.922	0.093	1.503	1.556	1.072	0.092	1.617	1.665	1.796	0.091	2.642	2.517	2.328	0.092	1.952	1.864	1.832	0.091	1.681	1.775	1.799	0.093	1.591	1.669	1.827	0.095	1.685	1.77	1.706	0.092	1.755	2.067	1.914	0.094	1.713	1.867	1.858	0.094	1.647	1.763	1.633
	2 days, 19:30:12	37	1.458	1.538	1.525	0.092	1.715	1.916	1.921	0.093	1.501	1.553	1.071	0.092	1.616	1.664	1.795	0.091	2.662	2.505	2.349	0.092	1.951	1.862	1.83	0.092	1.68	1.775	1.798	0.094	1.592	1.67	1.879	0.095	1.684	1.768	1.703	0.092	1.753	2.065	1.914	0.094	1.712	1.867	1.856	0.094	1.646	1.762	1.632
	2 days, 19:45:12	37	1.458	1.536	1.524	0.092	1.701	1.927	1.902	0.093	1.499	1.55	1.07	0.092	1.615	1.663	1.794	0.091	2.689	2.469	2.349	0.092	1.95	1.861	1.829	0.091	1.679	1.774	1.796	0.094	1.593	1.673	1.912	0.095	1.683	1.766	1.701	0.092	1.751	2.065	1.913	0.094	1.711	1.865	1.855	0.094	1.645	1.761	1.631
	2 days, 20:00:12	37	1.457	1.536	1.523	0.092	1.711	1.873	1.899	0.093	1.497	1.546	1.069	0.092	1.614	1.662	1.793	0.091	2.719	2.433	2.337	0.092	1.947	1.859	1.827	0.091	1.677	1.773	1.794	0.094	1.593	1.677	1.981	0.095	1.682	1.764	1.698	0.092	1.749	2.062	1.912	0.094	1.709	1.863	1.852	0.094	1.644	1.759	1.629
	2 days, 20:15:12	37	1.456	1.536	1.523	0.092	1.697	1.905	1.924	0.093	1.495	1.542	1.068	0.092	1.613	1.661	1.792	0.091	2.736	2.465	2.328	0.092	1.945	1.857	1.825	0.091	1.677	1.772	1.792	0.094	1.592	1.674	2.066	0.095	1.681	1.762	1.694	0.092	1.748	2.06	1.911	0.094	1.708	1.862	1.851	0.094	1.643	1.758	1.628
	2 days, 20:30:12	37	1.456	1.534	1.522	0.092	1.708	1.852	1.91	0.093	1.493	1.539	1.067	0.092	1.612	1.661	1.791	0.091	2.82	2.465	2.331	0.092	1.943	1.856	1.823	0.091	1.675	1.771	1.791	0.094	1.595	1.673	2.185	0.095	1.68	1.76	1.692	0.092	1.746	2.064	1.909	0.094	1.707	1.861	1.849	0.094	1.643	1.757	1.627
	2 days, 20:45:12	37	1.455	1.534	1.521	0.092	1.697	1.886	1.917	0.093	1.492	1.535	1.067	0.092	1.611	1.66	1.79	0.091	2.72	2.437	2.331	0.093	1.941	1.855	1.822	0.091	1.674	1.771	1.79	0.094	1.597	1.672	2.092	0.095	1.679	1.758	1.689	0.093	1.744	2.063	1.909	0.094	1.706	1.859	1.847	0.094	1.642	1.756	1.626
	2 days, 21:00:12	37	1.454	1.533	1.521	0.092	1.708	1.849	1.911	0.093	1.49	1.531	1.065	0.092	1.61	1.659	1.789	0.091	2.583	2.448	2.318	0.092	1.938	1.853	1.82	0.092	1.673	1.77	1.788	0.094	1.599	1.676	2.364	0.095	1.678	1.756	1.687	0.092	1.742	2.061	1.908	0.094	1.705	1.858	1.845	0.094	1.641	1.754	1.625
	2 days, 21:15:12	36.9	1.453	1.533	1.52	0.092	1.693	1.891	1.893	0.093	1.488	1.528	1.065	0.092	1.609	1.658	1.788	0.091	2.536	2.449	2.312	0.092	1.935	1.851	1.818	0.091	1.672	1.769	1.787	0.094	1.601	1.675	2.299	0.095	1.677	1.753	1.683	0.092	1.74	2.061	1.907	0.094	1.704	1.857	1.843	0.094	1.64	1.752	1.623
	2 days, 21:30:12	37	1.452	1.532	1.519	0.092	1.705	1.902	1.879	0.093	1.486	1.524	1.063	0.092	1.609	1.658	1.787	0.091	2.579	2.425	2.325	0.092	1.936	1.85	1.816	0.091	1.67	1.768	1.785	0.094	1.604	1.68	2.444	0.095	1.676	1.751	1.678	0.092	1.738	2.059	1.906	0.094	1.703	1.855	1.841	0.094	1.64	1.751	1.622
	2 days, 21:45:12	37	1.452	1.53	1.519	0.092	1.694	1.857	1.895	0.093	1.483	1.52	1.063	0.092	1.607	1.657	1.786	0.091	2.56	2.415	2.314	0.092	1.935	1.848	1.814	0.091	1.669	1.767	1.783	0.093	1.605	1.681	2.481	0.095	1.675	1.749	1.674	0.092	1.736	2.057	1.905	0.094	1.702	1.853	1.839	0.094	1.639	1.75	1.621
	2 days, 22:00:12	37	1.451	1.53	1.518	0.092	1.7	1.883	1.9	0.093	1.481	1.516	1.062	0.092	1.607	1.656	1.786	0.091	2.437	2.425	2.321	0.092	1.933	1.846	1.812	0.091	1.668	1.767	1.782	0.094	1.607	1.681	2.397	0.095	1.674	1.746	1.671	0.092	1.735	2.056	1.904	0.094	1.701	1.853	1.837	0.094	1.638	1.748	1.62
	2 days, 22:15:12	37	1.451	1.529	1.518	0.092	1.69	1.899	1.879	0.093	1.479	1.512	1.061	0.092	1.606	1.655	1.784	0.091	2.471	2.433	2.304	0.092	1.931	1.844	1.81	0.091	1.666	1.766	1.781	0.093	1.609	1.681	2.424	0.095	1.672	1.744	1.666	0.092	1.733	2.057	1.903	0.094	1.7	1.851	1.835	0.094	1.637	1.747	1.619
	2 days, 22:30:12	37	1.451	1.529	1.517	0.092	1.7	1.898	1.896	0.093	1.477	1.508	1.062	0.092	1.605	1.654	1.784	0.091	2.475	2.412	2.311	0.092	1.929	1.843	1.808	0.091	1.665	1.766	1.779	0.094	1.613	1.679	2.343	0.095	1.671	1.742	1.662	0.092	1.732	2.054	1.902	0.094	1.699	1.85	1.833	0.094	1.636	1.745	1.618
	2 days, 22:45:12	37	1.45	1.528	1.517	0.092	1.688	1.875	1.884	0.093	1.475	1.505	1.061	0.092	1.604	1.653	1.783	0.091	2.425	2.405	2.302	0.092	1.926	1.841	1.807	0.092	1.664	1.765	1.777	0.094	1.626	1.679	2.341	0.095	1.67	1.739	1.658	0.092	1.73	2.053	1.901	0.094	1.698	1.849	1.832	0.094	1.636	1.744	1.617
	2 days, 23:00:12	37	1.449	1.527	1.516	0.092	1.698	1.891	1.877	0.093	1.473	1.501	1.059	0.092	1.603	1.653	1.781	0.091	2.429	2.398	2.3	0.092	1.922	1.839	1.805	0.091	1.662	1.764	1.776	0.094	1.629	1.68	2.298	0.094	1.669	1.737	1.654	0.092	1.729	2.052	1.9	0.094	1.697	1.847	1.83	0.094	1.635	1.742	1.617
	2 days, 23:15:12	37	1.448	1.526	1.515	0.092	1.685	1.903	1.867	0.093	1.471	1.497	1.058	0.092	1.602	1.652	1.78	0.091	2.404	2.412	2.296	0.092	1.916	1.837	1.804	0.091	1.661	1.764	1.774	0.094	1.637	1.683	2.26	0.095	1.668	1.735	1.65	0.092	1.727	2.051	1.899	0.094	1.696	1.845	1.828	0.094	1.633	1.741	1.616
	2 days, 23:30:12	37	1.448	1.525	1.514	0.092	1.7	1.874	1.873	0.093	1.469	1.494	1.058	0.092	1.601	1.651	1.779	0.091	2.401	2.426	2.302	0.092	1.915	1.836	1.801	0.091	1.66	1.763	1.772	0.094	1.646	1.683	2.279	0.095	1.666	1.732	1.646	0.092	1.725	2.05	1.898	0.094	1.695	1.844	1.826	0.094	1.633	1.74	1.615
	2 days, 23:45:12	37	1.448	1.524	1.514	0.092	1.684	1.887	1.879	0.093	1.467	1.489	1.058	0.092	1.6	1.65	1.778	0.091	2.395	2.417	2.292	0.092	1.911	1.834	1.799	0.091	1.659	1.762	1.771	0.094	1.67	1.679	2.277	0.095	1.665	1.73	1.642	0.092	1.724	2.046	1.897	0.094	1.694	1.841	1.824	0.094	1.632	1.738	1.614
	3 days, 0:00:12	37	1.447	1.524	1.513	0.092	1.697	1.87	1.886	0.093	1.465	1.486	1.057	0.092	1.599	1.649	1.777	0.091	2.381	2.412	2.304	0.092	1.907	1.833	1.798	0.091	1.657	1.762	1.769	0.093	1.678	1.679	2.276	0.095	1.664	1.728	1.638	0.092	1.722	2.047	1.896	0.094	1.693	1.841	1.822	0.094	1.632	1.737	1.613
Results
		1	2	3	4	5	6	7	8	9	10	11	12
	A	3.467	3.372	3.357	-0.009	3.887	6.215	10.483	-0.015	3.497	3.343	1.657	0.004	Max V [600]
		1	1	1	0.681	0.997	0.99	0.923	0.771	0.981	1	1	0.529	R-Squared [600]
		07:15:12	07:30:12	07:30:12	00:30:12	16:45:12	2 days, 6:30:12	2 days, 5:30:12	00:30:12	18:00:12	23:30:12	1 day, 16:45:12	12:00:12	t at Max V [600]
		04:55:19	05:02:24	05:02:13	?????	12:20:13	2 days, 1:50:47	2 days, 2:43:34	?????	14:55:15	17:47:14	1 day, 7:40:13	10:25:12	Lagtime [600]
	B	3.539	3.447	3.619	-0.013	5.789	5.733	-7.072	-0.015	4.881	4.085	4.293	-0.008	Max V [600]
		1	1	0.955	0.758	0.873	0.995	0.927	0.747	0.962	1	0.947	0.632	R-Squared [600]
		07:30:12	07:15:12	10:45:12	00:30:12	2 days, 19:00:12	2 days, 9:15:12	2 days, 14:15:12	00:30:12	15:45:12	20:30:12	16:45:12	00:30:12	t at Max V [600]
		05:01:38	05:02:30	06:19:03	?????	2 days, 12:11:59	2 days, 4:07:35	2 days, 20:08:33	?????	13:05:19	15:11:20	13:37:46	?????	Lagtime [600]
	C	3.662	3.291	4.123	-0.013	3.187	3.507	5.721	-0.011	6.203	5.048	6.108	-0.016	Max V [600]
		1	1	0.892	0.843	0.999	0.961	0.782	0.701	0.994	0.963	0.937	0.929	R-Squared [600]
		07:45:12	07:30:12	13:45:12	00:30:12	06:45:12	12:15:12	2 days, 21:15:12	00:30:12	17:15:12	19:00:12	17:15:12	00:30:12	t at Max V [600]
		05:17:57	05:02:41	09:23:35	?????	04:43:10	06:50:38	2 days, 14:49:28	?????	14:38:32	15:49:59	15:00:01	?????	Lagtime [600]
	D	3.936	3.967	3.595	-0.017	3.375	3.415	3.515	-0.015	4.743	3.369	3.742	-0.01	Max V [600]
		0.908	0.848	0.917	0.878	0.904	1	0.908	0.91	0.927	1	1	0.731	R-Squared [600]
		12:45:12	14:30:12	14:00:12	00:30:12	13:45:12	07:45:12	13:00:12	00:30:12	11:30:12	07:30:12	07:45:12	00:30:12	t at Max V [600]
		07:24:41	08:23:46	08:09:15	?????	07:26:06	05:11:34	06:55:03	?????	07:25:02	05:05:11	05:21:15	?????	Lagtime [600]
	E	4.01	3.271	4.048	-0.013	-0.007	-0.007	0.004	-0.007	0.007	-0.007	-0.011	0.007	Max V [600]
		0.997	1	0.983	0.799	0.756	0.781	0.5	0.488	0.714	0.644	0.701	0.893	R-Squared [600]
		1 day, 3:00:12	22:45:12	16:30:12	00:30:12	00:30:12	00:30:12	2 days, 7:30:12	00:30:12	2 days, 7:45:12	00:30:12	00:30:12	1 day, 17:30:12	t at Max V [600]
		23:05:04	16:14:57	13:23:07	?????	?????	?????	2 days, 5:10:12	?????	2 days, 8:30:12	?????	?????	1 day, 17:24:12	Lagtime [600]
	F	3.268	4.267	4.44	-0.011	-0.005	-0.009	-0.009	-0.006	-0.007	-0.005	-0.007	-0.006	Max V [600]
		1	0.999	0.987	0.83	0.593	0.812	0.797	0.675	0.581	0.942	0.581	0.389	R-Squared [600]
		20:00:12	16:00:12	16:00:12	00:30:12	00:30:12	00:30:12	00:30:12	00:30:12	00:30:12	2 days, 21:15:12	00:30:12	00:30:12	t at Max V [600]
		12:40:56	12:06:46	12:05:07	?????	?????	?????	?????	?????	?????	2 days, 20:02:21	?????	?????	Lagtime [600]
	G	6.938	3.8	-13.287	-0.027	-0.016	-0.007	0.005	-0.019	-0.007	-0.006	-0.007	-0.009	Max V [600]
		0.987	0.937	0.644	0.852	0.709	0.658	0.696	0.76	0.581	0.75	0.5	0.636	R-Squared [600]
		19:15:12	14:15:12	00:30:12	23:30:12	00:30:12	00:30:12	2 days, 7:30:12	00:30:12	00:30:12	00:30:12	00:30:12	00:30:12	t at Max V [600]
		16:25:01	09:18:29	?????	22:00:56	?????	?????	2 days, 8:52:42	?????	?????	?????	?????	?????	Lagtime [600]
	H	3.655	3.732	4.247	-0.013	-0.008	0.005	-0.007	-0.008	-0.007	0.005	-0.005	-0.01	Max V [600]
		1	1	0.936	0.885	0.692	0.942	0.55	0.5	0.581	0.8	0.457	0.662	R-Squared [600]
		07:45:12	07:45:12	12:45:12	00:30:12	00:30:12	22:45:12	00:30:12	00:30:12	00:30:12	1 day, 20:45:12	00:30:12	00:30:12	t at Max V [600]
		05:07:18	05:12:56	07:37:23	?????	?????	23:15:12	?????	?????	?????	1 day, 21:22:42	?????	?????	Lagtime [600]
[truncated: 49 more columns]

## Sheet: Analysis
	Time	A1	A2	A3	A4		A5	A6	A7	A8		A9	A10	A11	A12		B1	B2	B3	B4		B5	B6	B7	B8		B9	B10	B11	B12		C1	C2	C3	C4		C5	C6	C7	C8		C9	C10	C11	C12		D1	D2	D3
	00:00:12	0.125	0.128	0.129	0.093	0.0343333	0.129	0.129	0.127	0.095	0.0333333	0.129	0.128	0.126	0.093	0.0346667	0.127	0.13	0.218	0.092	0.0663333	0.13	0.128	0.13	0.093	0.0363333	0.127	0.129	0.126	0.092	0.0353333	0.13	0.137	0.145	0.096	0.0413333	0.13	0.127	0.129	0.096	0.0326667	0.13	0.131	0.132	0.094	0.037	0.127	0.133	0.132
	00:15:12	0.129	0.131	0.133	0.092	0.039	0.13	0.13	0.13	0.095	0.035	0.132	0.13	0.13	0.093	0.0376667	0.13	0.133	0.21	0.092	0.0656667	0.133	0.131	0.133	0.093	0.0393333	0.13	0.132	0.129	0.091	0.0393333	0.135	0.141	0.147	0.096	0.045	0.134	0.131	0.134	0.096	0.037	0.134	0.135	0.132	0.093	0.0406667	0.125	0.129	0.136
	00:30:12	0.128	0.13	0.13	0.092	0.0373333	0.128	0.131	0.129	0.094	0.0353333	0.13	0.129	0.129	0.093	0.0363333	0.128	0.134	0.216	0.091	0.0683333	0.132	0.129	0.132	0.093	0.038	0.13	0.13	0.13	0.091	0.039	0.133	0.134	0.15	0.095	0.044	0.135	0.131	0.134	0.096	0.0373333	0.133	0.137	0.136	0.093	0.0423333	0.129	0.135	0.133
	00:45:12	0.129	0.129	0.13	0.092	0.0373333	0.129	0.131	0.13	0.094	0.036	0.131	0.129	0.129	0.093	0.0366667	0.126	0.135	0.219	0.091	0.069	0.132	0.129	0.133	0.092	0.0393333	0.13	0.131	0.13	0.091	0.0393333	0.126	0.134	0.152	0.095	0.0423333	0.135	0.133	0.134	0.096	0.038	0.134	0.138	0.136	0.093	0.043	0.138	0.136	0.132
	01:00:12	0.129	0.13	0.132	0.092	0.0383333	0.13	0.132	0.13	0.094	0.0366667	0.132	0.13	0.131	0.093	0.038	0.127	0.136	0.222	0.091	0.0706667	0.133	0.13	0.134	0.092	0.0403333	0.13	0.131	0.131	0.091	0.0396667	0.126	0.134	0.153	0.095	0.0426667	0.136	0.134	0.134	0.096	0.0386667	0.135	0.14	0.138	0.093	0.0446667	0.137	0.128	0.128
	01:15:12	0.131	0.132	0.134	0.092	0.0403333	0.13	0.132	0.131	0.095	0.036	0.132	0.131	0.131	0.093	0.0383333	0.128	0.138	0.223	0.091	0.072	0.135	0.131	0.135	0.092	0.0416667	0.131	0.133	0.132	0.091	0.041	0.127	0.135	0.154	0.095	0.0436667	0.137	0.134	0.135	0.096	0.0393333	0.136	0.141	0.139	0.093	0.0456667	0.137	0.128	0.128
	01:30:12	0.132	0.134	0.134	0.092	0.0413333	0.132	0.134	0.133	0.094	0.039	0.134	0.132	0.132	0.093	0.0396667	0.132	0.138	0.223	0.091	0.0733333	0.136	0.132	0.135	0.092	0.0423333	0.131	0.133	0.132	0.091	0.041	0.127	0.135	0.155	0.095	0.044	0.138	0.135	0.136	0.096	0.0403333	0.137	0.141	0.14	0.093	0.0463333	0.138	0.129	0.13
	01:45:12	0.134	0.135	0.136	0.092	0.043	0.133	0.136	0.134	0.094	0.0403333	0.134	0.133	0.132	0.093	0.04	0.134	0.14	0.223	0.091	0.0746667	0.137	0.133	0.137	0.092	0.0436667	0.133	0.134	0.133	0.091	0.0423333	0.129	0.137	0.156	0.095	0.0456667	0.138	0.137	0.137	0.096	0.0413333	0.138	0.143	0.141	0.093	0.0476667	0.138	0.132	0.132
	02:00:12	0.135	0.137	0.138	0.092	0.0446667	0.136	0.138	0.137	0.094	0.043	0.135	0.134	0.133	0.093	0.041	0.135	0.141	0.224	0.091	0.0756667	0.139	0.136	0.14	0.092	0.0463333	0.135	0.135	0.134	0.091	0.0436667	0.13	0.138	0.158	0.095	0.047	0.141	0.139	0.139	0.096	0.0436667	0.14	0.144	0.142	0.093	0.049	0.141	0.134	0.133
	02:15:12	0.138	0.14	0.14	0.092	0.0473333	0.138	0.141	0.139	0.094	0.0453333	0.136	0.135	0.135	0.093	0.0423333	0.138	0.143	0.225	0.091	0.0776667	0.142	0.138	0.143	0.092	0.049	0.136	0.137	0.136	0.091	0.0453333	0.133	0.141	0.16	0.095	0.0496667	0.143	0.142	0.142	0.096	0.0463333	0.143	0.147	0.145	0.093	0.052	0.143	0.136	0.135
	02:30:12	0.142	0.143	0.143	0.092	0.0506667	0.141	0.144	0.142	0.094	0.0483333	0.138	0.136	0.136	0.093	0.0436667	0.141	0.147	0.229	0.091	0.0813333	0.145	0.142	0.146	0.092	0.0523333	0.139	0.139	0.139	0.091	0.048	0.135	0.144	0.164	0.096	0.0516667	0.147	0.146	0.145	0.096	0.05	0.146	0.15	0.148	0.093	0.055	0.147	0.14	0.138
	02:45:12	0.146	0.147	0.147	0.092	0.0546667	0.145	0.148	0.146	0.094	0.0523333	0.139	0.138	0.137	0.093	0.045	0.145	0.15	0.231	0.091	0.0843333	0.149	0.145	0.15	0.092	0.056	0.141	0.141	0.141	0.091	0.05	0.139	0.148	0.168	0.095	0.0566667	0.151	0.15	0.15	0.096	0.0543333	0.149	0.153	0.151	0.093	0.058	0.15	0.143	0.142
	03:00:12	0.151	0.152	0.152	0.092	0.0596667	0.149	0.153	0.151	0.094	0.057	0.141	0.139	0.139	0.093	0.0466667	0.15	0.155	0.235	0.091	0.089	0.154	0.151	0.156	0.092	0.0616667	0.145	0.144	0.145	0.091	0.0536667	0.143	0.154	0.173	0.095	0.0616667	0.157	0.156	0.155	0.096	0.06	0.153	0.158	0.155	0.093	0.0623333	0.155	0.147	0.146
	03:15:12	0.157	0.157	0.158	0.092	0.0653333	0.155	0.159	0.157	0.094	0.063	0.142	0.141	0.141	0.093	0.0483333	0.157	0.161	0.242	0.091	0.0956667	0.161	0.157	0.162	0.092	0.068	0.148	0.148	0.149	0.091	0.0573333	0.149	0.16	0.18	0.095	0.068	0.163	0.162	0.161	0.096	0.066	0.159	0.163	0.159	0.093	0.0673333	0.161	0.153	0.152
	03:30:12	0.165	0.164	0.165	0.092	0.0726667	0.162	0.166	0.164	0.094	0.07	0.144	0.144	0.143	0.093	0.0506667	0.164	0.168	0.249	0.091	0.102667	0.169	0.164	0.17	0.092	0.0756667	0.153	0.151	0.154	0.091	0.0616667	0.155	0.167	0.188	0.095	0.075	0.171	0.17	0.169	0.096	0.074	0.165	0.17	0.165	0.093	0.0736667	0.168	0.16	0.158
	03:45:12	0.174	0.173	0.173	0.092	0.0813333	0.17	0.175	0.173	0.094	0.0786667	0.147	0.146	0.145	0.093	0.053	0.173	0.176	0.258	0.091	0.111333	0.178	0.173	0.179	0.092	0.0846667	0.159	0.156	0.16	0.091	0.0673333	0.163	0.176	0.197	0.095	0.0836667	0.181	0.18	0.178	0.096	0.0836667	0.172	0.177	0.172	0.093	0.0806667	0.177	0.168	0.166
	04:00:12	0.185	0.183	0.184	0.092	0.092	0.18	0.185	0.183	0.094	0.0886667	0.15	0.149	0.148	0.093	0.056	0.184	0.186	0.271	0.091	0.122667	0.189	0.183	0.19	0.092	0.0953333	0.165	0.162	0.167	0.091	0.0736667	0.173	0.188	0.209	0.095	0.095	0.193	0.192	0.189	0.096	0.0953333	0.181	0.185	0.18	0.093	0.089	0.188	0.178	0.176
	04:15:12	0.198	0.195	0.196	0.092	0.104333	0.191	0.197	0.194	0.094	0.1	0.153	0.152	0.151	0.093	0.059	0.197	0.199	0.284	0.091	0.135667	0.202	0.196	0.203	0.092	0.108333	0.172	0.169	0.174	0.091	0.0806667	0.185	0.2	0.222	0.095	0.107333	0.206	0.205	0.203	0.096	0.108667	0.19	0.195	0.19	0.093	0.0986667	0.2	0.189	0.187
	04:30:12	0.213	0.21	0.211	0.092	0.119333	0.205	0.211	0.208	0.094	0.114	0.157	0.156	0.155	0.093	0.063	0.212	0.214	0.298	0.091	0.150333	0.217	0.21	0.218	0.092	0.123	0.18	0.177	0.183	0.091	0.089	0.199	0.215	0.238	0.095	0.122333	0.222	0.222	0.219	0.096	0.125	0.201	0.208	0.201	0.093	0.110333	0.214	0.203	0.199
	04:45:12	0.232	0.226	0.227	0.092	0.136333	0.221	0.228	0.224	0.094	0.130333	0.161	0.16	0.16	0.093	0.0673333	0.23	0.23	0.318	0.091	0.168333	0.235	0.227	0.236	0.092	0.140667	0.189	0.186	0.193	0.091	0.0983333	0.214	0.232	0.256	0.095	0.139	0.241	0.241	0.237	0.096	0.143667	0.215	0.22	0.215	0.093	0.123667	0.23	0.219	0.215
	05:00:12	0.253	0.246	0.246	0.092	0.156333	0.239	0.247	0.242	0.094	0.148667	0.167	0.165	0.164	0.093	0.0723333	0.251	0.25	0.339	0.091	0.189	0.256	0.247	0.257	0.092	0.161333	0.201	0.196	0.205	0.091	0.109667	0.233	0.252	0.276	0.096	0.157667	0.263	0.263	0.258	0.096	0.165333	0.229	0.236	0.23	0.093	0.138667	0.249	0.237	0.232
	05:15:12	0.278	0.269	0.269	0.092	0.18	0.26	0.269	0.264	0.094	0.170333	0.172	0.17	0.17	0.093	0.0776667	0.275	0.273	0.365	0.091	0.213333	0.28	0.271	0.282	0.092	0.185667	0.212	0.207	0.217	0.091	0.121	0.254	0.275	0.299	0.095	0.181	0.288	0.288	0.282	0.096	0.19	0.245	0.252	0.246	0.093	0.154667	0.272	0.258	0.252
	05:30:12	0.306	0.294	0.295	0.092	0.206333	0.284	0.295	0.289	0.094	0.195333	0.178	0.177	0.176	0.093	0.084	0.302	0.299	0.392	0.091	0.24	0.307	0.297	0.31	0.092	0.212667	0.225	0.219	0.231	0.091	0.134	0.279	0.301	0.327	0.095	0.207333	0.317	0.316	0.309	0.096	0.218	0.265	0.27	0.264	0.093	0.173333	0.298	0.283	0.274
	05:45:12	0.339	0.324	0.324	0.092	0.237	0.312	0.324	0.317	0.094	0.223667	0.185	0.184	0.183	0.093	0.091	0.333	0.33	0.424	0.091	0.271333	0.338	0.328	0.341	0.092	0.243667	0.24	0.233	0.247	0.091	0.149	0.308	0.331	0.357	0.095	0.237	0.349	0.349	0.341	0.096	0.250333	0.285	0.291	0.285	0.093	0.194	0.326	0.309	0.3
	06:00:12	0.376	0.358	0.356	0.092	0.271333	0.342	0.357	0.349	0.094	0.255333	0.193	0.192	0.19	0.093	0.0986667	0.369	0.362	0.459	0.091	0.305667	0.373	0.362	0.376	0.092	0.278333	0.255	0.249	0.263	0.091	0.164667	0.34	0.363	0.39	0.095	0.269333	0.385	0.386	0.377	0.096	0.286667	0.307	0.315	0.309	0.093	0.217333	0.359	0.339	0.329
	06:15:12	0.417	0.396	0.394	0.092	0.310333	0.377	0.394	0.385	0.094	0.291333	0.202	0.2	0.199	0.093	0.107333	0.409	0.398	0.496	0.091	0.343333	0.411	0.399	0.415	0.092	0.316333	0.273	0.266	0.28	0.091	0.182	0.376	0.398	0.425	0.095	0.304667	0.425	0.427	0.416	0.096	0.326667	0.332	0.34	0.335	0.093	0.242667	0.395	0.373	0.361
	06:30:12	0.461	0.434	0.434	0.092	0.351	0.414	0.433	0.423	0.094	0.329333	0.212	0.21	0.208	0.093	0.117	0.453	0.44	0.536	0.091	0.385333	0.453	0.44	0.457	0.092	0.358	0.292	0.285	0.3	0.091	0.201333	0.418	0.439	0.465	0.095	0.345667	0.47	0.471	0.458	0.096	0.370333	0.359	0.367	0.362	0.093	0.269667	0.433	0.41	0.395
	06:45:12	0.507	0.478	0.478	0.092	0.395667	0.457	0.477	0.465	0.094	0.372333	0.222	0.22	0.218	0.093	0.127	0.498	0.485	0.578	0.091	0.429333	0.498	0.483	0.504	0.092	0.403	0.312	0.306	0.321	0.091	0.222	0.461	0.48	0.504	0.095	0.386667	0.517	0.518	0.505	0.096	0.417333	0.389	0.396	0.393	0.093	0.299667	0.477	0.453	0.433
	07:00:12	0.558	0.525	0.526	0.092	0.444333	0.501	0.524	0.509	0.094	0.417333	0.232	0.231	0.23	0.093	0.138	0.548	0.535	0.619	0.091	0.476333	0.544	0.528	0.551	0.092	0.449	0.333	0.328	0.345	0.091	0.244333	0.508	0.524	0.545	0.095	0.430667	0.566	0.567	0.551	0.096	0.465333	0.417	0.427	0.424	0.093	0.329667	0.523	0.499	0.474
	07:15:12	0.609	0.574	0.575	0.092	0.494	0.546	0.57	0.558	0.094	0.464	0.244	0.243	0.241	0.093	0.149667	0.598	0.586	0.665	0.091	0.525333	0.59	0.572	0.593	0.092	0.493	0.356	0.351	0.369	0.091	0.267667	0.56	0.572	0.59	0.095	0.479	0.616	0.617	0.599	0.096	0.514667	0.451	0.461	0.459	0.093	0.364	0.575	0.549	0.52
	07:30:12	0.663	0.628	0.625	0.092	0.546667	0.59	0.617	0.606	0.094	0.510333	0.257	0.255	0.254	0.093	0.162333	0.652	0.638	0.711	0.091	0.576	0.637	0.617	0.634	0.092	0.537333	0.38	0.377	0.393	0.091	0.292333	0.612	0.622	0.636	0.095	0.528333	0.653	0.664	0.644	0.096	0.557667	0.482	0.495	0.494	0.093	0.397333	0.636	0.598	0.569
	07:45:12	0.715	0.677	0.677	0.092	0.597667	0.632	0.66	0.651	0.094	0.553667	0.271	0.269	0.268	0.093	0.176333	0.706	0.692	0.758	0.091	0.627667	0.68	0.664	0.677	0.092	0.581667	0.406	0.401	0.419	0.091	0.317667	0.669	0.673	0.682	0.095	0.579667	0.697	0.71	0.689	0.096	0.602667	0.516	0.529	0.529	0.093	0.431667	0.632	0.651	0.617
	08:00:12	0.759	0.726	0.727	0.092	0.645333	0.673	0.699	0.698	0.094	0.596	0.284	0.282	0.282	0.093	0.189667	0.759	0.734	0.802	0.091	0.674	0.721	0.703	0.721	0.092	0.623	0.433	0.427	0.446	0.091	0.344333	0.725	0.721	0.727	0.095	0.629333	0.739	0.756	0.733	0.096	0.646667	0.551	0.564	0.566	0.093	0.467333	0.678	0.705	0.664
	08:15:12	0.803	0.772	0.774	0.092	0.691	0.71	0.741	0.741	0.094	0.636667	0.298	0.297	0.296	0.093	0.204	0.807	0.776	0.837	0.091	0.715667	0.762	0.744	0.758	0.092	0.662667	0.461	0.455	0.473	0.091	0.372	0.778	0.769	0.771	0.095	0.677667	0.778	0.801	0.776	0.096	0.689	0.584	0.6	0.601	0.093	0.502	0.726	0.755	0.71
	08:30:12	0.844	0.812	0.815	0.092	0.731667	0.75	0.781	0.782	0.094	0.677	0.315	0.313	0.313	0.093	0.220667	0.854	0.82	0.873	0.091	0.758	0.804	0.782	0.794	0.092	0.701333	0.488	0.484	0.502	0.091	0.400333	0.825	0.813	0.813	0.095	0.722	0.819	0.841	0.812	0.096	0.728	0.618	0.634	0.639	0.093	0.537333	0.77	0.805	0.755
	08:45:12	0.884	0.857	0.835	0.092	0.766667	0.79	0.819	0.824	0.094	0.717	0.331	0.329	0.329	0.093	0.236667	0.895	0.864	0.904	0.091	0.796667	0.844	0.818	0.831	0.092	0.739	0.517	0.514	0.528	0.091	0.428667	0.871	0.857	0.854	0.095	0.765667	0.859	0.877	0.848	0.096	0.765333	0.651	0.667	0.673	0.093	0.570667	0.814	0.845	0.798
	09:00:12	0.921	0.898	0.881	0.092	0.808	0.827	0.856	0.861	0.094	0.754	0.349	0.346	0.347	0.093	0.254333	0.937	0.906	0.937	0.091	0.835667	0.883	0.857	0.866	0.092	0.776667	0.543	0.542	0.556	0.091	0.456	0.916	0.852	0.891	0.095	0.791333	0.894	0.911	0.885	0.096	0.800667	0.684	0.698	0.706	0.093	0.603	0.857	0.887	0.843
	09:15:12	0.96	0.939	0.923	0.092	0.848667	0.864	0.894	0.9	0.094	0.792	0.366	0.363	0.364	0.093	0.271333	0.977	0.949	0.97	0.091	0.874333	0.918	0.864	0.903	0.092	0.803	0.57	0.571	0.564	0.091	0.477333	0.963	0.894	0.927	0.095	0.833	0.928	0.943	0.923	0.096	0.835333	0.714	0.729	0.738	0.093	0.634	0.898	0.933	0.882
	09:30:12	0.996	0.978	0.957	0.092	0.885	0.896	0.933	0.935	0.094	0.827333	0.384	0.381	0.383	0.093	0.289667	1.016	1.004	1.002	0.091	0.916333	0.952	0.9	0.936	0.092	0.837333	0.595	0.596	0.591	0.091	0.503	1.005	0.931	0.962	0.095	0.871	0.965	0.978	0.956	0.096	0.870333	0.743	0.757	0.766	0.093	0.662333	0.94	0.977	0.924
	09:45:12	1.029	1.015	0.998	0.092	0.922	0.927	0.962	0.969	0.094	0.858667	0.401	0.399	0.402	0.093	0.307667	1.054	1.027	1.032	0.091	0.946667	0.984	0.933	0.967	0.092	0.869333	0.617	0.624	0.616	0.091	0.528	1.047	0.966	0.994	0.095	0.907333	0.955	1.012	0.987	0.096	0.888667	0.767	0.785	0.794	0.093	0.689	0.982	1.018	0.962
	10:00:12	1.065	1.049	1.039	0.092	0.959	0.959	0.992	1.001	0.094	0.89	0.418	0.418	0.42	0.093	0.325667	1.092	1.067	1.061	0.091	0.982333	1.013	0.966	0.997	0.092	0.9	0.638	0.648	0.637	0.091	0.55	1.085	1.004	1.029	0.095	0.944333	0.996	1.04	1.016	0.096	0.921333	0.791	0.809	0.818	0.093	0.713	1.019	1.055	0.999
	10:15:12	1.098	1.077	1.075	0.092	0.991333	0.989	1.021	1.027	0.094	0.918333	0.435	0.436	0.438	0.093	0.343333	1.128	1.104	1.089	0.091	1.016	1.041	0.996	1.026	0.092	0.929	0.658	0.673	0.656	0.091	0.571333	1.121	1.039	1.046	0.095	0.973667	1.018	1.069	1.043	0.096	0.947333	0.814	0.832	0.84	0.093	0.735667	1.06	1.09	1.034
	10:30:12	1.132	1.106	1.111	0.092	1.02433	0.92	1.047	1.055	0.094	0.913333	0.455	0.453	0.457	0.093	0.362	1.161	1.139	1.1	0.091	1.04233	1.066	1.026	1.051	0.092	0.955667	0.68	0.694	0.677	0.091	0.592667	1.155	1.072	1.069	0.095	1.00367	1.045	1.095	1.069	0.095	0.974667	0.833	0.854	0.861	0.093	0.756333	1.097	1.123	1.069
	10:45:12	1.158	1.139	1.144	0.092	1.055	0.945	1.072	1.081	0.094	0.938667	0.466	0.47	0.475	0.093	0.377333	1.19	1.171	1.18	0.091	1.08933	1.093	1.052	1.076	0.092	0.981667	0.698	0.717	0.695	0.091	0.612333	1.187	1.102	1.102	0.095	1.03533	1.071	1.121	1.093	0.096	0.999	0.853	0.873	0.878	0.093	0.775	1.134	1.153	1.104
	11:00:12	1.198	1.173	1.175	0.092	1.09	0.97	1.095	1.102	0.094	0.961667	0.483	0.488	0.494	0.093	0.395333	1.217	1.202	1.254	0.091	1.13333	1.117	1.078	1.098	0.092	1.00567	0.713	0.735	0.711	0.091	0.628667	1.217	1.132	1.155	0.095	1.073	1.094	1.139	1.118	0.095	1.022	0.868	0.891	0.893	0.093	0.791	1.17	1.181	1.133
	11:15:12	1.225	1.203	1.201	0.092	1.11767	0.991	1.111	1.114	0.094	0.978	0.498	0.505	0.509	0.093	0.411	1.243	1.23	1.284	0.091	1.16133	1.139	1.099	1.121	0.092	1.02767	0.73	0.75	0.726	0.091	0.644333	1.247	1.16	1.191	0.095	1.10433	1.115	1.156	1.138	0.095	1.04133	0.88	0.906	0.901	0.093	0.802667	1.203	1.209	1.163
	11:30:12	1.251	1.232	1.229	0.092	1.14533	0.998	1.121	1.117	0.094	0.984667	0.514	0.52	0.525	0.093	0.426667	1.263	1.262	1.314	0.091	1.18867	1.157	1.12	1.139	0.092	1.04667	0.738	0.763	0.734	0.091	0.654	1.275	1.186	0.97	0.095	1.04867	1.138	1.172	1.157	0.095	1.06067	0.887	0.906	0.738	0.093	0.750667	1.232	1.235	1.19
	11:45:12	1.277	1.259	1.256	0.092	1.172	1.002	1.124	1.12	0.094	0.988	0.528	0.537	0.54	0.093	0.442	1.276	1.287	1.339	0.091	1.20967	1.171	1.131	1.149	0.092	1.05833	0.746	0.771	0.74	0.091	0.661333	1.3	1.211	1.001	0.095	1.07567	1.153	1.176	1.171	0.095	1.07167	0.892	0.911	0.745	0.093	0.756333	1.258	1.255	1.215
	12:00:12	1.297	1.285	1.282	0.092	1.196	1.002	1.125	1.119	0.094	0.988	0.543	0.551	0.556	0.093	0.457	1.314	1.312	1.356	0.091	1.23633	1.178	1.136	1.153	0.092	1.06367	0.75	0.778	0.745	0.091	0.666667	1.321	1.236	1.029	0.095	1.10033	1.164	1.194	1.18	0.096	1.08333	0.897	0.916	0.752	0.093	0.762	1.28	1.278	1.242
	12:15:12	1.313	1.305	1.303	0.092	1.215	1.001	1.125	1.115	0.094	0.986333	0.556	0.566	0.571	0.093	0.471333	1.397	1.334	1.378	0.091	1.27867	1.182	1.139	1.154	0.092	1.06633	0.755	0.781	0.747	0.091	0.67	1.336	1.257	1.053	0.095	1.12033	1.171	1.252	1.183	0.096	1.106	0.902	0.919	0.756	0.093	0.766	1.282	1.295	1.264
	12:30:12	1.328	1.322	1.32	0.092	1.23133	1.005	1.127	1.116	0.094	0.988667	0.569	0.579	0.585	0.094	0.483667	1.466	1.354	1.394	0.091	1.31367	1.182	1.141	1.156	0.092	1.06767	0.757	0.785	0.754	0.092	0.673333	1.349	1.276	1.077	0.095	1.139	1.176	1.335	1.187	0.096	1.13667	0.904	0.922	0.76	0.093	0.769	1.296	1.304	1.282
	12:45:12	1.339	1.336	1.335	0.092	1.24467	1.007	1.126	1.117	0.094	0.989333	0.582	0.592	0.597	0.093	0.497333	1.452	1.366	1.407	0.091	1.31733	1.184	1.141	1.155	0.092	1.068	0.761	0.788	0.756	0.091	0.677333	1.359	1.289	1.1	0.095	1.15433	1.18	1.369	1.186	0.096	1.149	0.906	0.925	0.765	0.093	0.772333	1.399	1.301	1.295
	13:00:12	1.351	1.348	1.348	0.092	1.257	1.012	1.13	1.121	0.094	0.993667	0.591	0.604	0.608	0.093	0.508	1.449	1.376	1.419	0.091	1.32367	1.186	1.143	1.156	0.092	1.06967	0.763	0.794	0.761	0.091	0.681667	1.37	1.302	1.113	0.095	1.16667	1.183	1.355	1.189	0.096	1.14633	0.907	0.926	0.769	0.093	0.774333	1.486	1.321	1.304
	13:15:12	1.359	1.361	1.361	0.092	1.26833	1.021	1.134	1.127	0.094	1	0.601	0.614	0.617	0.093	0.517667	1.458	1.387	1.429	0.091	1.33367	1.188	1.146	1.159	0.092	1.07233	0.768	0.796	0.764	0.092	0.684	1.379	1.313	1.129	0.095	1.17867	1.185	1.356	1.192	0.096	1.14833	0.91	0.928	0.772	0.093	0.777	1.482	1.402	1.31
	13:30:12	1.365	1.369	1.372	0.092	1.27667	1.029	1.141	1.134	0.094	1.00733	0.609	0.623	0.624	0.093	0.525667	1.481	1.396	1.437	0.091	1.347	1.192	1.15	1.161	0.092	1.07567	0.769	0.802	0.764	0.092	0.686333	1.383	1.324	1.13	0.095	1.184	1.183	1.371	1.196	0.095	1.155	0.913	0.932	0.776	0.093	0.780667	1.498	1.487	1.304
	13:45:12	1.367	1.377	1.379	0.092	1.28233	1.034	1.147	1.14	0.094	1.013	0.614	0.63	0.629	0.093	0.531333	1.479	1.402	1.445	0.091	1.351	1.197	1.155	1.165	0.092	1.08033	0.771	0.809	0.767	0.091	0.691333	1.381	1.334	1.193	0.095	1.20767	1.184	1.395	1.202	0.095	1.16533	0.916	0.934	0.779	0.093	0.783333	1.526	1.484	1.311
	14:00:12	1.363	1.381	1.385	0.092	1.28433	1.041	1.153	1.144	0.094	1.01867	0.62	0.636	0.634	0.093	0.537	1.493	1.407	1.451	0.091	1.35933	1.202	1.16	1.171	0.092	1.08567	0.774	0.819	0.77	0.091	0.696667	1.371	1.341	1.328	0.095	1.25167	1.218	1.432	1.252	0.095	1.20567	0.92	0.938	0.783	0.093	0.787333	1.556	1.492	1.386
	14:15:12	1.354	1.383	1.388	0.092	1.283	1.046	1.159	1.146	0.094	1.023	0.624	0.643	0.64	0.093	0.542667	1.513	1.408	1.455	0.091	1.36767	1.206	1.165	1.176	0.092	1.09033	0.776	0.833	0.774	0.091	0.703333	1.391	1.346	1.339	0.095	1.26367	1.282	1.477	1.207	0.095	1.227	0.923	0.943	0.788	0.093	0.791667	1.591	1.508	1.482
	14:30:12	1.369	1.379	1.39	0.092	1.28733	1.051	1.166	1.141	0.094	1.02533	0.628	0.649	0.642	0.093	0.546667	1.54	1.403	1.459	0.091	1.37633	1.208	1.169	1.181	0.092	1.094	0.781	0.852	0.779	0.091	0.713	1.458	1.35	1.34	0.095	1.28767	1.349	1.524	1.212	0.095	1.26667	0.928	0.947	0.791	0.093	0.795667	1.629	1.54	1.488
	14:45:12	1.427	1.371	1.391	0.092	1.30433	1.054	1.172	1.14	0.094	1.028	0.632	0.658	0.647	0.093	0.552667	1.572	1.397	1.462	0.091	1.386	1.207	1.173	1.183	0.092	1.09567	0.784	0.877	0.783	0.091	0.723667	1.512	1.352	1.353	0.095	1.31067	1.353	1.57	1.213	0.095	1.28367	0.932	0.952	0.797	0.093	0.800667	1.667	1.701	1.486
	15:00:12	1.48	1.389	1.391	0.092	1.328	1.058	1.175	1.197	0.094	1.04933	0.636	0.666	0.65	0.093	0.557667	1.604	1.417	1.462	0.091	1.40333	1.203	1.175	1.187	0.092	1.09633	0.784	0.907	0.786	0.091	0.734667	1.496	1.353	1.373	0.095	1.31233	1.359	1.613	1.212	0.095	1.29967	0.936	0.957	0.798	0.093	0.804	1.704	1.693	1.494
	15:15:12	1.475	1.435	1.392	0.092	1.342	1.059	1.177	1.303	0.094	1.08567	0.638	0.675	0.654	0.093	0.562667	1.631	1.462	1.458	0.091	1.426	1.215	1.175	1.185	0.092	1.09967	0.779	0.946	0.79	0.091	0.747333	1.492	1.351	1.401	0.095	1.31967	1.378	1.649	1.207	0.095	1.31633	0.939	0.961	0.803	0.093	0.808	1.737	1.698	1.508
	15:30:12	1.458	1.48	1.392	0.092	1.35133	1.06	1.176	1.333	0.094	1.09567	0.642	0.687	0.657	0.093	0.569	1.654	1.512	1.453	0.091	1.44867	1.265	1.166	1.178	0.093	1.11	0.805	0.987	0.793	0.091	0.770667	1.495	1.348	1.436	0.095	1.33133	1.402	1.68	1.206	0.096	1.33333	0.943	0.965	0.805	0.093	0.811333	1.769	1.684	1.528
	15:45:12	1.454	1.487	1.392	0.092	1.35233	1.054	1.165	1.318	0.094	1.085	0.645	0.7	0.66	0.093	0.575333	1.672	1.524	1.461	0.091	1.46133	1.353	1.157	1.183	0.092	1.139	0.903	1.02	0.795	0.092	0.814	1.498	1.354	1.472	0.095	1.34633	1.429	1.703	1.228	0.095	1.35833	0.944	0.968	0.808	0.093	0.813667	1.8	1.689	1.555
	16:00:12	1.458	1.472	1.39	0.092	1.348	1.042	1.174	1.326	0.094	1.08667	0.648	0.716	0.665	0.093	0.583333	1.685	1.511	1.49	0.091	1.471	1.428	1.173	1.233	0.092	1.186	1.009	1.027	0.791	0.091	0.851333	1.504	1.382	1.507	0.095	1.36933	1.463	1.716	1.279	0.095	1.391	0.94	0.971	0.811	0.093	0.814333	1.831	1.724	1.586
	16:15:12	1.466	1.464	1.389	0.092	1.34767	1.047	1.234	1.345	0.094	1.11467	0.65	0.732	0.667	0.093	0.59	1.696	1.508	1.523	0.091	1.48467	1.447	1.229	1.336	0.093	1.24433	1.043	1.017	0.79	0.091	0.859	1.518	1.429	1.539	0.095	1.40033	1.504	1.723	1.346	0.095	1.42933	0.929	0.972	0.81	0.093	0.810667	1.859	1.765	1.621
	16:30:12	1.476	1.464	1.385	0.092	1.34967	1.093	1.304	1.369	0.094	1.16133	0.652	0.749	0.67	0.093	0.597333	1.708	1.51	1.544	0.091	1.49633	1.454	1.309	1.447	0.092	1.31133	1.058	1.012	0.855	0.092	0.883	1.536	1.484	1.569	0.095	1.43467	1.548	1.73	1.405	0.095	1.466	0.917	0.974	0.81	0.093	0.807333	1.885	1.796	1.658
	16:45:12	1.49	1.467	1.378	0.092	1.353	1.159	1.333	1.399	0.094	1.203	0.653	0.763	0.673	0.093	0.603333	1.719	1.52	1.553	0.091	1.50633	1.47	1.399	1.473	0.093	1.35433	1.079	1.012	0.96	0.092	0.925	1.558	1.505	1.597	0.095	1.45833	1.592	1.736	1.438	0.095	1.49367	0.927	0.976	0.804	0.093	0.809333	1.906	1.828	1.696
	17:00:12	1.508	1.473	1.376	0.092	1.36033	1.222	1.337	1.435	0.094	1.23733	0.654	0.77	0.675	0.093	0.606667	1.73	1.533	1.557	0.091	1.51567	1.498	1.464	1.471	0.092	1.38567	1.104	1.011	1.016	0.092	0.951667	1.584	1.494	1.621	0.095	1.47133	1.634	1.749	1.469	0.095	1.52233	0.991	0.977	0.823	0.093	0.837333	1.925	1.897	1.732
	17:15:12	1.528	1.48	1.389	0.092	1.37367	1.274	1.348	1.472	0.094	1.27067	0.657	0.769	0.679	0.093	0.608667	1.741	1.549	1.565	0.091	1.52733	1.534	1.503	1.483	0.093	1.41367	1.134	1.014	1.032	0.091	0.969	1.609	1.486	1.641	0.095	1.48367	1.673	1.75	1.498	0.095	1.54533	1.103	0.979	0.938	0.093	0.913667	1.943	1.947	1.768
	17:30:12	1.547	1.49	1.408	0.092	1.38967	1.305	1.368	1.509	0.094	1.3	0.673	0.767	0.681	0.093	0.614	1.753	1.568	1.579	0.091	1.54233	1.574	1.544	1.508	0.092	1.45	1.172	1.022	1.053	0.092	0.990333	1.631	1.49	1.659	0.095	1.49833	1.706	1.719	1.519	0.095	1.553	1.204	0.981	1.097	0.093	1.001	1.958	1.974	1.8
	17:45:12	1.563	1.502	1.428	0.092	1.40567	1.335	1.395	1.535	0.094	1.32767	0.714	0.767	0.684	0.093	0.628667	1.762	1.588	1.592	0.091	1.55633	1.611	1.584	1.536	0.092	1.485	1.222	1.031	1.079	0.091	1.01967	1.652	1.501	1.678	0.095	1.51533	1.733	1.697	1.535	0.095	1.56	1.286	0.981	1.125	0.093	1.03767	1.971	2.002	1.829
	18:00:12	1.574	1.517	1.451	0.092	1.422	1.366	1.429	1.551	0.094	1.35467	0.78	0.765	0.686	0.093	0.650667	1.771	1.606	1.61	0.091	1.57133	1.64	1.619	1.568	0.092	1.517	1.277	1.041	1.116	0.092	1.05267	1.671	1.515	1.694	0.095	1.53167	1.757	1.693	1.555	0.095	1.57333	1.359	0.978	1.157	0.093	1.07167	1.983	2.022	1.852
	18:15:12	1.585	1.532	1.474	0.092	1.43833	1.399	1.466	1.556	0.094	1.37967	0.845	0.772	0.688	0.093	0.675333	1.78	1.623	1.627	0.091	1.58567	1.661	1.649	1.607	0.093	1.546	1.337	1.053	1.159	0.092	1.091	1.687	1.532	1.708	0.095	1.54733	1.774	1.692	1.578	0.095	1.58633	1.425	0.972	1.201	0.093	1.10633	1.994	2.063	1.871
	18:30:12	1.594	1.544	1.492	0.092	1.45133	1.437	1.501	1.558	0.094	1.40467	0.869	0.764	0.69	0.093	0.681333	1.789	1.638	1.642	0.091	1.59867	1.677	1.673	1.643	0.093	1.57133	1.4	1.069	1.208	0.092	1.13367	1.702	1.554	1.722	0.095	1.56433	1.788	1.695	1.607	0.095	1.60167	1.489	0.961	1.252	0.093	1.141	2.003	2.097	1.888
	18:45:12	1.6	1.556	1.511	0.092	1.46367	1.464	1.527	1.56	0.094	1.423	0.877	0.756	0.692	0.093	0.682	1.797	1.652	1.658	0.091	1.61133	1.691	1.693	1.671	0.092	1.593	1.463	1.09	1.262	0.092	1.17967	1.713	1.575	1.734	0.095	1.579	1.801	1.696	1.638	0.095	1.61667	1.559	0.988	1.31	0.093	1.19267	2.01	2.113	1.904
	19:00:12	1.605	1.566	1.536	0.092	1.477	1.48	1.542	1.556	0.094	1.432	0.892	0.743	0.694	0.093	0.683333	1.804	1.663	1.674	0.091	1.62267	1.706	1.705	1.689	0.092	1.608	1.524	1.119	1.318	0.092	1.22833	1.723	1.597	1.745	0.094	1.59433	1.813	1.698	1.671	0.095	1.63233	1.631	1.075	1.37	0.093	1.26567	2.017	2.127	1.919
	19:15:12	1.61	1.575	1.558	0.092	1.489	1.482	1.554	1.55	0.094	1.43467	0.91	0.736	0.695	0.093	0.687333	1.81	1.673	1.688	0.091	1.63267	1.719	1.712	1.697	0.092	1.61733	1.581	1.157	1.374	0.092	1.27867	1.734	1.617	1.756	0.095	1.60733	1.818	1.697	1.702	0.095	1.644	1.691	1.194	1.43	0.093	1.34533	2.023	2.133	1.932
	19:30:12	1.615	1.582	1.575	0.092	1.49867	1.487	1.559	1.544	0.094	1.436	0.934	0.739	0.697	0.093	0.697	1.816	1.681	1.703	0.091	1.64233	1.731	1.709	1.695	0.092	1.61967	1.633	1.204	1.434	0.092	1.33167	1.745	1.636	1.766	0.095	1.62067	1.823	1.696	1.732	0.095	1.65533	1.741	1.237	1.49	0.093	1.39633	2.028	2.143	1.943
	19:45:12	1.619	1.588	1.585	0.092	1.50533	1.489	1.563	1.534	0.094	1.43467	0.963	0.75	0.698	0.093	0.710667	1.821	1.688	1.717	0.091	1.651	1.743	1.703	1.689	0.092	1.61967	1.685	1.256	1.493	0.092	1.386	1.754	1.653	1.774	0.095	1.632	1.82	1.696	1.755	0.095	1.662	1.786	1.249	1.548	0.093	1.43467	2.032	2.145	1.953
	20:00:12	1.624	1.594	1.591	0.092	1.511	1.487	1.561	1.527	0.094	1.431	1	0.769	0.699	0.093	0.729667	1.825	1.693	1.728	0.091	1.65767	1.741	1.692	1.678	0.093	1.61067	1.732	1.31	1.549	0.092	1.43833	1.764	1.669	1.782	0.095	1.64333	1.813	1.692	1.771	0.095	1.66367	1.821	1.285	1.602	0.093	1.47633	2.035	2.152	1.961
	20:15:12	1.627	1.599	1.594	0.092	1.51467	1.487	1.554	1.524	0.094	1.42767	1.042	0.794	0.7	0.093	0.752333	1.83	1.698	1.738	0.091	1.66433	1.731	1.685	1.67	0.092	1.60333	1.78	1.369	1.604	0.092	1.49233	1.772	1.684	1.788	0.094	1.654	1.779	1.689	1.774	0.095	1.65233	1.847	1.33	1.65	0.093	1.516	2.037	2.156	1.97
	20:30:12	1.63	1.604	1.597	0.092	1.51833	1.468	1.546	1.513	0.094	1.415	1.086	0.825	0.701	0.093	0.777667	1.834	1.702	1.746	0.091	1.66967	1.708	1.67	1.661	0.092	1.58767	1.816	1.431	1.651	0.092	1.54067	1.779	1.697	1.796	0.094	1.66333	1.755	1.685	1.761	0.095	1.63867	1.866	1.379	1.692	0.093	1.55267	2.035	2.159	1.978
	20:45:12	1.633	1.607	1.598	0.092	1.52067	1.455	1.536	1.503	0.094	1.404	1.131	0.855	0.703	0.093	0.803333	1.836	1.705	1.754	0.091	1.674	1.692	1.658	1.652	0.092	1.57533	1.841	1.494	1.696	0.092	1.585	1.785	1.708	1.802	0.095	1.67	1.739	1.681	1.758	0.095	1.631	1.883	1.435	1.727	0.093	1.58867	2.035	2.162	1.985
	21:00:12	1.634	1.611	1.601	0.092	1.52333	1.443	1.527	1.491	0.094	1.393	1.177	0.884	0.704	0.093	0.828667	1.839	1.708	1.76	0.091	1.678	1.684	1.646	1.643	0.092	1.56567	1.865	1.554	1.735	0.092	1.626	1.79	1.719	1.808	0.094	1.67833	1.728	1.675	1.752	0.095	1.62333	1.903	1.492	1.757	0.093	1.62433	2.036	2.163	1.992
	21:15:12	1.636	1.613	1.603	0.092	1.52533	1.437	1.518	1.482	0.094	1.385	1.226	0.911	0.705	0.093	0.854333	1.842	1.711	1.766	0.091	1.682	1.674	1.629	1.633	0.092	1.55333	1.882	1.608	1.768	0.092	1.66067	1.795	1.728	1.812	0.094	1.68433	1.718	1.671	1.747	0.095	1.617	1.912	1.549	1.785	0.093	1.65567	2.037	2.167	1.999
	21:30:12	1.638	1.616	1.604	0.092	1.52733	1.431	1.509	1.47	0.094	1.376	1.277	0.939	0.707	0.093	0.881333	1.843	1.713	1.77	0.091	1.68433	1.673	1.613	1.623	0.092	1.54433	1.9	1.655	1.797	0.092	1.692	1.8	1.734	1.817	0.094	1.68967	1.707	1.666	1.74	0.095	1.60933	1.92	1.606	1.808	0.093	1.685	2.038	2.17	2.006
	21:45:12	1.639	1.618	1.605	0.092	1.52867	1.424	1.5	1.448	0.094	1.36333	1.327	0.966	0.707	0.093	0.907	1.843	1.715	1.775	0.091	1.68667	1.662	1.6	1.611	0.092	1.53233	1.916	1.7	1.823	0.092	1.721	1.804	1.741	1.821	0.094	1.69467	1.69	1.663	1.732	0.095	1.6	1.926	1.658	1.827	0.093	1.71067	2.039	2.171	2.012
	22:00:12	1.641	1.619	1.607	0.092	1.53033	1.408	1.49	1.434	0.094	1.35	1.376	0.998	0.709	0.093	0.934667	1.844	1.718	1.78	0.091	1.68967	1.647	1.588	1.596	0.092	1.51833	1.933	1.744	1.844	0.092	1.74833	1.808	1.746	1.829	0.095	1.69933	1.667	1.661	1.721	0.095	1.588	1.932	1.703	1.843	0.093	1.733	2.039	2.171	2.017
	22:15:12	1.641	1.621	1.607	0.092	1.531	1.383	1.479	1.431	0.094	1.337	1.421	1.036	0.711	0.093	0.963	1.845	1.719	1.783	0.091	1.69133	1.631	1.579	1.581	0.092	1.505	1.946	1.784	1.861	0.092	1.77167	1.811	1.752	1.833	0.094	1.70467	1.649	1.659	1.704	0.095	1.57567	1.938	1.742	1.857	0.093	1.75267	2.04	2.17	2.021
	22:30:12	1.642	1.622	1.609	0.092	1.53233	1.367	1.47	1.429	0.094	1.328	1.464	1.08	0.712	0.093	0.992333	1.846	1.722	1.786	0.091	1.69367	1.615	1.568	1.564	0.092	1.49033	1.96	1.817	1.879	0.092	1.79333	1.815	1.756	1.838	0.094	1.709	1.634	1.657	1.679	0.095	1.56167	1.945	1.78	1.867	0.093	1.771	2.041	2.174	2.026
	22:45:12	1.643	1.623	1.609	0.092	1.533	1.358	1.461	1.427	0.094	1.32133	1.504	1.126	0.712	0.093	1.021	1.846	1.723	1.789	0.091	1.695	1.601	1.557	1.545	0.092	1.47567	1.97	1.845	1.898	0.092	1.81233	1.818	1.761	1.842	0.094	1.713	1.62	1.656	1.654	0.095	1.54833	1.951	1.814	1.874	0.093	1.78667	2.041	2.173	2.03
	23:00:12	1.643	1.624	1.61	0.092	1.53367	1.354	1.449	1.428	0.094	1.31633	1.541	1.175	0.713	0.093	1.05	1.846	1.725	1.792	0.091	1.69667	1.588	1.546	1.524	0.092	1.46067	1.981	1.864	1.912	0.092	1.827	1.821	1.764	1.846	0.094	1.71633	1.609	1.656	1.638	0.095	1.53933	1.959	1.846	1.881	0.093	1.80233	2.041	2.182	2.034
	23:15:12	1.644	1.625	1.61	0.092	1.53433	1.353	1.441	1.426	0.094	1.31267	1.575	1.224	0.714	0.093	1.078	1.846	1.727	1.794	0.091	1.698	1.576	1.536	1.505	0.092	1.447	1.99	1.88	1.927	0.092	1.84033	1.823	1.768	1.85	0.094	1.71967	1.598	1.655	1.621	0.095	1.52967	1.969	1.882	1.885	0.093	1.819	2.041	2.18	2.038
	23:30:12	1.645	1.626	1.61	0.092	1.535	1.355	1.439	1.424	0.094	1.312	1.606	1.275	0.714	0.093	1.10533	1.846	1.729	1.796	0.091	1.69933	1.567	1.531	1.49	0.092	1.43733	1.999	1.898	1.938	0.092	1.853	1.825	1.772	1.853	0.094	1.72267	1.592	1.654	1.609	0.095	1.52333	1.979	1.907	1.889	0.093	1.832	2.041	2.177	2.042
	23:45:12	1.645	1.626	1.611	0.092	1.53533	1.356	1.439	1.424	0.094	1.31233	1.634	1.326	0.715	0.093	1.132	1.846	1.73	1.799	0.091	1.70067	1.562	1.528	1.478	0.092	1.43067	2.01	1.918	1.953	0.092	1.86833	1.828	1.774	1.856	0.094	1.72533	1.584	1.652	1.596	0.095	1.51567	1.987	1.926	1.893	0.093	1.84233	2.041	2.177	2.047
	1 day, 0:00:12	1.646	1.627	1.611	0.092	1.536	1.357	1.441	1.424	0.094	1.31333	1.659	1.374	0.716	0.093	1.15667	1.846	1.732	1.8	0.091	1.70167	1.56	1.526	1.472	0.092	1.42733	2.02	1.936	1.966	0.092	1.882	1.83	1.778	1.859	0.094	1.72833	1.579	1.65	1.584	0.095	1.50933	1.994	1.943	1.9	0.093	1.85267	2.041	2.179	2.05
	1 day, 0:15:12	1.646	1.628	1.61	0.092	1.536	1.356	1.444	1.425	0.094	1.31433	1.68	1.422	0.716	0.093	1.17967	1.846	1.734	1.803	0.091	1.70333	1.559	1.525	1.469	0.092	1.42567	2.03	1.952	1.984	0.092	1.89667	1.832	1.781	1.861	0.094	1.73067	1.574	1.649	1.577	0.095	1.505	2.002	1.96	1.906	0.093	1.863	2.04	2.181	2.053
	1 day, 0:30:12	1.646	1.628	1.61	0.092	1.536	1.355	1.446	1.426	0.094	1.315	1.7	1.466	0.717	0.093	1.20133	1.845	1.736	1.805	0.091	1.70433	1.558	1.526	1.468	0.092	1.42533	2.042	1.967	2.003	0.092	1.912	1.834	1.784	1.864	0.094	1.73333	1.571	1.648	1.57	0.095	1.50133	2.008	1.977	1.91	0.093	1.872	2.041	2.179	2.056
	1 day, 0:45:12	1.647	1.629	1.61	0.092	1.53667	1.356	1.447	1.429	0.094	1.31667	1.72	1.506	0.718	0.093	1.22167	1.844	1.737	1.806	0.091	1.70467	1.56	1.529	1.468	0.092	1.427	2.051	1.983	2.016	0.092	1.92467	1.836	1.787	1.867	0.094	1.736	1.567	1.648	1.563	0.095	1.49767	2.015	1.992	1.915	0.093	1.881	2.039	2.181	2.061
	1 day, 1:00:12	1.647	1.629	1.611	0.092	1.537	1.357	1.448	1.432	0.094	1.31833	1.738	1.543	0.719	0.093	1.24033	1.843	1.739	1.809	0.091	1.706	1.562	1.531	1.47	0.092	1.429	2.059	1.998	2.025	0.092	1.93533	1.837	1.79	1.87	0.094	1.73833	1.565	1.648	1.558	0.095	1.49533	2.02	2.007	1.918	0.093	1.88867	2.039	2.185	2.063
	1 day, 1:15:12	1.647	1.63	1.611	0.092	1.53733	1.36	1.449	1.435	0.094	1.32067	1.751	1.577	0.719	0.093	1.256	1.843	1.74	1.811	0.091	1.707	1.564	1.534	1.473	0.092	1.43167	2.065	2.009	2.031	0.092	1.943	1.839	1.794	1.873	0.094	1.74133	1.564	1.649	1.554	0.095	1.494	2.026	2.02	1.921	0.093	1.896	2.038	2.183	2.062
	1 day, 1:30:12	1.647	1.63	1.611	0.092	1.53733	1.364	1.451	1.437	0.094	1.32333	1.763	1.609	0.72	0.093	1.271	1.842	1.741	1.813	0.091	1.70767	1.566	1.538	1.479	0.092	1.43567	2.068	2.018	2.035	0.092	1.94833	1.84	1.796	1.874	0.094	1.74267	1.564	1.648	1.553	0.095	1.49333	2.031	2.031	1.924	0.093	1.90233	2.038	2.185	2.063
	1 day, 1:45:12	1.647	1.63	1.611	0.092	1.53733	1.367	1.453	1.439	0.094	1.32567	1.77	1.641	0.721	0.093	1.28433	1.841	1.743	1.814	0.091	1.70833	1.568	1.541	1.483	0.092	1.43867	2.07	2.019	2.041	0.092	1.95133	1.842	1.799	1.876	0.094	1.745	1.564	1.648	1.552	0.095	1.493	2.035	2.041	1.927	0.093	1.908	2.038	2.188	2.063
	1 day, 2:00:12	1.647	1.63	1.611	0.092	1.53733	1.371	1.454	1.443	0.094	1.32867	1.779	1.669	0.721	0.093	1.29667	1.839	1.744	1.817	0.091	1.709	1.571	1.545	1.49	0.092	1.44333	2.067	2.024	2.046	0.092	1.95367	1.843	1.803	1.878	0.094	1.74733	1.563	1.649	1.552	0.095	1.493	2.038	2.048	1.927	0.093	1.91133	2.037	2.184	2.064
	1 day, 2:15:12	1.647	1.631	1.611	0.092	1.53767	1.376	1.457	1.446	0.094	1.33233	1.786	1.706	0.722	0.093	1.31167	1.839	1.745	1.818	0.091	1.70967	1.574	1.549	1.495	0.092	1.44733	2.065	2.028	2.05	0.092	1.95567	1.844	1.805	1.879	0.094	1.74867	1.563	1.649	1.555	0.095	1.494	2.039	2.054	1.927	0.093	1.91367	2.036	2.183	2.064
	1 day, 2:30:12	1.647	1.631	1.611	0.092	1.53767	1.382	1.459	1.45	0.094	1.33633	1.791	1.742	0.723	0.093	1.32567	1.838	1.747	1.821	0.091	1.711	1.577	1.552	1.499	0.092	1.45067	2.068	2.032	2.055	0.092	1.95967	1.845	1.807	1.882	0.094	1.75067	1.564	1.649	1.558	0.095	1.49533	2.038	2.056	1.93	0.093	1.915	2.035	2.182	2.064
	1 day, 2:45:12	1.647	1.631	1.611	0.092	1.53767	1.387	1.463	1.452	0.094	1.34	1.797	1.768	0.723	0.093	1.33633	1.837	1.747	1.822	0.091	1.711	1.579	1.556	1.503	0.092	1.454	2.072	2.033	2.058	0.092	1.96233	1.846	1.81	1.884	0.094	1.75267	1.565	1.649	1.56	0.095	1.49633	2.037	2.054	1.93	0.093	1.914	2.033	2.186	2.063
	1 day, 3:00:12	1.647	1.632	1.611	0.092	1.538	1.392	1.465	1.455	0.094	1.34333	1.801	1.783	0.724	0.093	1.343	1.836	1.749	1.824	0.091	1.712	1.582	1.559	1.508	0.092	1.45767	2.076	2.035	2.06	0.092	1.965	1.847	1.813	1.884	0.094	1.754	1.566	1.65	1.561	0.095	1.49733	2.033	2.05	1.931	0.093	1.91167	2.032	2.186	2.056
	1 day, 3:15:12	1.646	1.632	1.611	0.092	1.53767	1.397	1.47	1.461	0.094	1.34867	1.805	1.796	0.724	0.093	1.34867	1.835	1.75	1.826	0.091	1.71267	1.586	1.561	1.512	0.092	1.461	2.08	2.036	2.062	0.091	1.96833	1.847	1.815	1.886	0.094	1.75533	1.567	1.65	1.562	0.095	1.498	2.027	2.041	1.933	0.093	1.90733	2.031	2.187	2.049
	1 day, 3:30:12	1.646	1.632	1.612	0.092	1.538	1.405	1.474	1.464	0.094	1.35367	1.807	1.808	0.726	0.093	1.354	1.833	1.751	1.828	0.091	1.713	1.589	1.565	1.515	0.092	1.46433	2.084	2.038	2.063	0.092	1.96967	1.849	1.818	1.888	0.094	1.75767	1.568	1.651	1.565	0.095	1.49967	2.022	2.029	1.932	0.093	1.90133	2.03	2.186	2.041
	1 day, 3:45:12	1.646	1.633	1.612	0.092	1.53833	1.41	1.478	1.469	0.094	1.35833	1.81	1.818	0.727	0.093	1.35867	1.832	1.752	1.829	0.091	1.71333	1.594	1.567	1.518	0.092	1.46767	2.086	2.039	2.065	0.092	1.97133	1.848	1.82	1.89	0.094	1.75867	1.57	1.651	1.567	0.095	1.501	2.013	2.02	1.934	0.093	1.896	2.03	2.185	2.04
	1 day, 4:00:12	1.645	1.633	1.612	0.092	1.538	1.417	1.484	1.472	0.094	1.36367	1.811	1.828	0.727	0.093	1.36233	1.831	1.753	1.831	0.091	1.714	1.596	1.569	1.522	0.092	1.47033	2.088	2.041	2.066	0.092	1.973	1.849	1.822	1.891	0.094	1.76	1.571	1.651	1.567	0.095	1.50133	2.004	2.02	1.933	0.093	1.89267	2.028	2.19	2.037
	1 day, 4:15:12	1.645	1.633	1.612	0.092	1.538	1.425	1.487	1.476	0.094	1.36867	1.813	1.834	0.728	0.093	1.36533	1.829	1.754	1.833	0.091	1.71433	1.599	1.571	1.526	0.092	1.47333	2.092	2.042	2.067	0.092	1.975	1.85	1.825	1.893	0.094	1.762	1.572	1.651	1.568	0.095	1.502	1.994	2.02	1.933	0.093	1.88933	2.027	2.189	2.036
	1 day, 4:30:12	1.644	1.633	1.612	0.092	1.53767	1.431	1.493	1.481	0.094	1.37433	1.812	1.844	0.728	0.093	1.36833	1.828	1.755	1.835	0.091	1.715	1.603	1.574	1.53	0.092	1.477	2.094	2.043	2.068	0.092	1.97633	1.849	1.827	1.893	0.094	1.76233	1.573	1.652	1.569	0.095	1.503	1.988	2.02	1.937	0.093	1.88867	2.026	2.189	2.034
	1 day, 4:45:12	1.643	1.633	1.612	0.092	1.53733	1.44	1.498	1.487	0.094	1.381	1.814	1.848	0.729	0.093	1.37067	1.827	1.756	1.836	0.091	1.71533	1.605	1.576	1.532	0.092	1.479	2.094	2.043	2.069	0.092	1.97667	1.85	1.829	1.894	0.094	1.76367	1.574	1.653	1.57	0.095	1.504	1.988	2.022	1.937	0.093	1.88933	2.024	2.188	2.033
	1 day, 5:00:12	1.643	1.633	1.612	0.092	1.53733	1.445	1.502	1.488	0.094	1.38433	1.813	1.851	0.729	0.093	1.37133	1.825	1.756	1.838	0.091	1.71533	1.609	1.579	1.536	0.092	1.48267	2.095	2.044	2.069	0.091	1.97833	1.85	1.831	1.895	0.094	1.76467	1.575	1.653	1.57	0.095	1.50433	1.987	2.022	1.932	0.093	1.88733	2.023	2.19	2.032
	1 day, 5:15:12	1.642	1.633	1.612	0.092	1.537	1.449	1.508	1.493	0.094	1.38933	1.813	1.853	0.73	0.093	1.37233	1.824	1.757	1.839	0.091	1.71567	1.614	1.582	1.539	0.092	1.48633	2.096	2.045	2.07	0.092	1.97833	1.85	1.833	1.897	0.094	1.766	1.576	1.653	1.573	0.095	1.50567	1.986	2.024	1.929	0.093	1.88667	2.022	2.185	2.03
	1 day, 5:30:12	1.641	1.633	1.612	0.092	1.53667	1.455	1.512	1.498	0.094	1.39433	1.814	1.855	0.731	0.093	1.37367	1.823	1.758	1.84	0.091	1.716	1.617	1.585	1.546	0.092	1.49067	2.096	2.046	2.071	0.092	1.979	1.85	1.835	1.898	0.094	1.767	1.578	1.654	1.573	0.095	1.50667	1.984	2.022	1.927	0.093	1.88467	2.021	2.189	2.028
	1 day, 5:45:12	1.64	1.633	1.612	0.092	1.53633	1.462	1.518	1.502	0.094	1.4	1.812	1.855	0.731	0.093	1.373	1.821	1.758	1.841	0.091	1.71567	1.619	1.587	1.55	0.092	1.49333	2.097	2.045	2.07	0.091	1.97967	1.85	1.837	1.899	0.094	1.768	1.579	1.654	1.574	0.095	1.50733	1.984	2.021	1.924	0.093	1.88333	2.019	2.188	2.027
	1 day, 6:00:12	1.639	1.633	1.613	0.092	1.53633	1.467	1.523	1.505	0.094	1.40433	1.811	1.855	0.731	0.093	1.37267	1.82	1.759	1.843	0.091	1.71633	1.621	1.589	1.554	0.092	1.496	2.098	2.046	2.07	0.091	1.98033	1.85	1.839	1.899	0.094	1.76867	1.58	1.655	1.574	0.095	1.508	1.984	2.021	1.924	0.093	1.88333	2.018	2.19	2.027
	1 day, 6:15:12	1.638	1.633	1.613	0.092	1.536	1.471	1.529	1.508	0.094	1.40867	1.811	1.854	0.732	0.093	1.37267	1.819	1.76	1.844	0.091	1.71667	1.623	1.592	1.556	0.092	1.49833	2.098	2.046	2.07	0.092	1.97933	1.85	1.841	1.901	0.094	1.77	1.58	1.656	1.576	0.095	1.509	1.983	2.018	1.924	0.093	1.882	2.017	2.188	2.026
	1 day, 6:30:12	1.637	1.633	1.613	0.092	1.53567	1.478	1.534	1.514	0.094	1.41467	1.807	1.853	0.732	0.093	1.371	1.818	1.76	1.846	0.091	1.717	1.624	1.594	1.56	0.092	1.50067	2.098	2.046	2.069	0.091	1.98	1.849	1.843	1.901	0.094	1.77033	1.581	1.656	1.577	0.095	1.50967	1.981	2.019	1.923	0.093	1.88133	2.015	2.188	2.025
	1 day, 6:45:12	1.637	1.633	1.613	0.092	1.53567	1.482	1.539	1.519	0.094	1.41933	1.805	1.851	0.732	0.093	1.36967	1.817	1.76	1.847	0.091	1.717	1.627	1.596	1.565	0.092	1.504	2.098	2.046	2.069	0.092	1.979	1.849	1.844	1.902	0.094	1.771	1.583	1.657	1.578	0.095	1.511	1.979	2.02	1.924	0.093	1.88133	2.014	2.188	2.024
	1 day, 7:00:12	1.636	1.632	1.613	0.092	1.535	1.489	1.544	1.522	0.093	1.42533	1.804	1.851	0.733	0.093	1.36967	1.815	1.76	1.847	0.091	1.71633	1.628	1.598	1.571	0.092	1.507	2.098	2.046	2.068	0.091	1.97967	1.849	1.846	1.902	0.094	1.77167	1.583	1.657	1.579	0.095	1.51133	1.976	2.019	1.931	0.093	1.88233	2.013	2.187	2.022
	1 day, 7:15:12	1.635	1.632	1.613	0.092	1.53467	1.496	1.55	1.526	0.094	1.43	1.8	1.849	0.733	0.093	1.36767	1.814	1.761	1.848	0.091	1.71667	1.632	1.6	1.574	0.092	1.51	2.098	2.045	2.067	0.092	1.978	1.848	1.848	1.903	0.094	1.77233	1.583	1.658	1.579	0.095	1.51167	1.975	2.018	1.934	0.093	1.88267	2.011	2.186	2.022
	1 day, 7:30:12	1.634	1.632	1.613	0.092	1.53433	1.501	1.556	1.53	0.094	1.435	1.799	1.848	0.733	0.093	1.367	1.813	1.761	1.849	0.091	1.71667	1.635	1.601	1.576	0.092	1.512	2.098	2.045	2.066	0.092	1.97767	1.848	1.849	1.904	0.094	1.773	1.584	1.658	1.58	0.095	1.51233	1.973	2.019	1.938	0.093	1.88367	2.01	2.184	2.021
	1 day, 7:45:12	1.632	1.632	1.612	0.092	1.53333	1.504	1.56	1.534	0.094	1.43867	1.798	1.846	0.733	0.093	1.366	1.811	1.762	1.85	0.091	1.71667	1.636	1.603	1.579	0.092	1.514	2.098	2.045	2.058	0.092	1.975	1.847	1.851	1.904	0.094	1.77333	1.585	1.659	1.581	0.095	1.51333	1.97	2.02	1.942	0.093	1.88433	2.009	2.183	2.02
	1 day, 8:00:12	1.631	1.632	1.612	0.092	1.533	1.508	1.564	1.538	0.094	1.44267	1.797	1.844	0.733	0.093	1.365	1.81	1.762	1.85	0.091	1.71633	1.638	1.603	1.581	0.092	1.51533	2.098	2.044	2.054	0.092	1.97333	1.847	1.852	1.904	0.094	1.77367	1.586	1.659	1.581	0.095	1.51367	1.968	2.021	1.945	0.093	1.885	2.007	2.187	2.019
	1 day, 8:15:12	1.63	1.631	1.612	0.092	1.53233	1.514	1.57	1.542	0.094	1.448	1.795	1.841	0.733	0.093	1.36333	1.808	1.762	1.851	0.091	1.716	1.64	1.606	1.583	0.092	1.51767	2.098	2.043	2.045	0.092	1.97	1.846	1.853	1.905	0.094	1.774	1.587	1.66	1.58	0.095	1.514	1.965	2.021	1.949	0.093	1.88533	2.006	2.184	2.018
	1 day, 8:30:12	1.629	1.631	1.612	0.092	1.532	1.52	1.574	1.546	0.094	1.45267	1.793	1.836	0.733	0.093	1.361	1.807	1.763	1.852	0.091	1.71633	1.643	1.608	1.585	0.092	1.52	2.097	2.043	2.04	0.092	1.968	1.846	1.854	1.904	0.094	1.774	1.588	1.661	1.58	0.095	1.51467	1.964	2.019	1.953	0.093	1.88567	2.004	2.186	2.018
	1 day, 8:45:12	1.628	1.631	1.611	0.092	1.53133	1.524	1.576	1.55	0.094	1.456	1.788	1.833	0.733	0.093	1.35833	1.806	1.763	1.853	0.091	1.71633	1.644	1.609	1.588	0.092	1.52167	2.097	2.043	2.037	0.092	1.967	1.845	1.856	1.904	0.094	1.77433	1.588	1.662	1.582	0.095	1.51567	1.962	2.019	1.956	0.093	1.886	2.003	2.183	2.017
	1 day, 9:00:12	1.627	1.63	1.611	0.092	1.53067	1.528	1.582	1.553	0.094	1.46033	1.784	1.83	0.734	0.093	1.35633	1.805	1.763	1.854	0.091	1.71633	1.646	1.611	1.591	0.092	1.524	2.097	2.042	2.034	0.092	1.96567	1.845	1.857	1.903	0.094	1.77433	1.589	1.662	1.583	0.095	1.51633	1.961	2.02	1.96	0.093	1.88733	2.002	2.187	2.017
	1 day, 9:15:12	1.626	1.63	1.611	0.092	1.53033	1.534	1.588	1.557	0.094	1.46567	1.78	1.827	0.734	0.093	1.354	1.803	1.763	1.854	0.091	1.71567	1.647	1.612	1.592	0.092	1.525	2.097	2.041	2.031	0.092	1.96433	1.844	1.858	1.904	0.094	1.77467	1.589	1.663	1.583	0.095	1.51667	1.959	2.02	1.96	0.093	1.88667	2	2.186	2.016
	1 day, 9:30:12	1.624	1.63	1.611	0.092	1.52967	1.539	1.591	1.56	0.094	1.46933	1.775	1.824	0.735	0.093	1.35167	1.802	1.763	1.855	0.091	1.71567	1.649	1.614	1.595	0.092	1.52733	2.097	2.041	2.031	0.092	1.96433	1.843	1.859	1.903	0.094	1.77433	1.591	1.663	1.584	0.095	1.51767	1.956	2.018	1.963	0.093	1.886	1.998	2.182	2.015
	1 day, 9:45:12	1.623	1.63	1.61	0.092	1.529	1.542	1.598	1.562	0.094	1.47333	1.771	1.822	0.734	0.093	1.34933	1.8	1.763	1.855	0.091	1.715	1.65	1.615	1.597	0.092	1.52867	2.097	2.04	2.03	0.092	1.96367	1.843	1.86	1.903	0.094	1.77467	1.591	1.664	1.584	0.095	1.518	1.954	2.017	1.963	0.093	1.885	1.998	2.184	2.015
	1 day, 10:00:12	1.622	1.63	1.61	0.092	1.52867	1.549	1.6	1.565	0.094	1.47733	1.767	1.819	0.734	0.093	1.347	1.799	1.763	1.856	0.091	1.715	1.651	1.617	1.599	0.092	1.53033	2.096	2.039	2.029	0.092	1.96267	1.842	1.861	1.903	0.094	1.77467	1.591	1.665	1.584	0.095	1.51833	1.952	2.013	1.965	0.093	1.88367	1.996	2.184	2.014
	1 day, 10:15:12	1.621	1.629	1.61	0.092	1.528	1.551	1.603	1.568	0.094	1.48	1.764	1.813	0.734	0.093	1.344	1.797	1.762	1.856	0.091	1.714	1.653	1.619	1.601	0.092	1.53233	2.096	2.038	2.028	0.092	1.962	1.841	1.862	1.902	0.094	1.77433	1.592	1.665	1.585	0.095	1.519	1.95	2.022	1.966	0.093	1.88633	1.994	2.184	2.014
	1 day, 10:30:12	1.619	1.629	1.61	0.092	1.52733	1.555	1.609	1.569	0.094	1.48367	1.761	1.808	0.735	0.093	1.34167	1.796	1.762	1.857	0.091	1.714	1.655	1.619	1.603	0.092	1.53367	2.096	2.037	2.026	0.092	1.961	1.841	1.862	1.902	0.094	1.77433	1.593	1.666	1.586	0.095	1.52	1.948	2.022	1.97	0.093	1.887	1.992	2.181	2.014
	1 day, 10:45:12	1.618	1.629	1.609	0.092	1.52667	1.559	1.61	1.573	0.094	1.48667	1.758	1.802	0.738	0.093	1.33967	1.794	1.762	1.857	0.091	1.71333	1.656	1.621	1.605	0.092	1.53533	2.096	2.036	2.025	0.092	1.96033	1.84	1.863	1.901	0.094	1.774	1.593	1.667	1.586	0.095	1.52033	1.946	2.022	1.973	0.093	1.88733	1.991	2.18	2.013
	1 day, 11:00:12	1.617	1.628	1.609	0.092	1.526	1.564	1.615	1.574	0.094	1.49033	1.754	1.798	0.746	0.093	1.33967	1.793	1.762	1.858	0.091	1.71333	1.658	1.622	1.606	0.092	1.53667	2.095	2.035	2.023	0.092	1.959	1.84	1.863	1.9	0.094	1.77367	1.593	1.667	1.586	0.095	1.52033	1.944	2.026	1.976	0.093	1.889	1.99	2.179	2.012
	1 day, 11:15:12	1.616	1.627	1.609	0.092	1.52533	1.565	1.617	1.579	0.094	1.493	1.759	1.794	0.757	0.093	1.34367	1.792	1.762	1.858	0.091	1.713	1.659	1.623	1.607	0.092	1.53767	2.095	2.033	2.024	0.092	1.95867	1.839	1.864	1.9	0.094	1.77367	1.594	1.668	1.588	0.095	1.52167	1.943	2.027	1.98	0.093	1.89033	1.988	2.183	2.012
	1 day, 11:30:12	1.614	1.627	1.609	0.092	1.52467	1.571	1.622	1.581	0.094	1.49733	1.759	1.789	0.77	0.093	1.34633	1.79	1.762	1.858	0.091	1.71233	1.659	1.625	1.609	0.092	1.539	2.094	2.032	2.023	0.091	1.95867	1.838	1.864	1.901	0.094	1.77367	1.595	1.669	1.587	0.095	1.522	1.94	2.026	1.984	0.093	1.89033	1.986	2.18	2.011
	1 day, 11:45:12	1.613	1.627	1.608	0.092	1.524	1.573	1.623	1.583	0.094	1.499	1.758	1.786	0.782	0.093	1.349	1.789	1.761	1.859	0.091	1.712	1.66	1.628	1.609	0.092	1.54033	2.094	2.031	2.021	0.092	1.95667	1.838	1.865	1.9	0.094	1.77367	1.595	1.669	1.588	0.095	1.52233	1.938	2.023	1.988	0.093	1.89	1.985	2.181	2.011
	1 day, 12:00:12	1.612	1.627	1.608	0.092	1.52367	1.578	1.628	1.585	0.094	1.503	1.756	1.783	0.795	0.093	1.35167	1.788	1.762	1.859	0.091	1.712	1.662	1.63	1.611	0.092	1.54233	2.093	2.031	2.022	0.092	1.95667	1.837	1.865	1.9	0.094	1.77333	1.596	1.67	1.588	0.095	1.523	1.936	2.028	1.991	0.093	1.892	1.983	2.178	2.01
	1 day, 12:15:12	1.611	1.626	1.608	0.092	1.523	1.579	1.63	1.588	0.094	1.505	1.753	1.779	0.808	0.093	1.35367	1.786	1.761	1.859	0.091	1.711	1.663	1.631	1.611	0.092	1.543	2.092	2.03	2.022	0.091	1.957	1.836	1.866	1.901	0.094	1.77367	1.596	1.671	1.587	0.095	1.523	1.935	2.026	1.997	0.093	1.893	1.982	2.18	2.009
	1 day, 12:30:12	1.61	1.626	1.607	0.092	1.52233	1.583	1.633	1.591	0.093	1.50933	1.751	1.774	0.811	0.093	1.35233	1.784	1.761	1.859	0.091	1.71033	1.665	1.632	1.612	0.092	1.54433	2.092	2.029	2.021	0.092	1.95533	1.835	1.866	1.901	0.094	1.77333	1.597	1.672	1.589	0.095	1.52433	1.933	2.023	2.001	0.093	1.89267	1.981	2.179	2.009
	1 day, 12:45:12	1.609	1.625	1.607	0.092	1.52167	1.583	1.634	1.593	0.094	1.50933	1.749	1.772	0.821	0.093	1.35433	1.782	1.761	1.859	0.091	1.70967	1.667	1.633	1.613	0.092	1.54567	2.091	2.028	2.02	0.092	1.95433	1.835	1.865	1.9	0.094	1.77267	1.598	1.673	1.589	0.095	1.525	1.933	2.031	2.003	0.093	1.896	1.979	2.18	2.009
	1 day, 13:00:12	1.607	1.625	1.607	0.092	1.521	1.588	1.639	1.596	0.094	1.51367	1.745	1.769	0.825	0.093	1.35333	1.781	1.76	1.86	0.091	1.70933	1.669	1.634	1.615	0.092	1.54733	2.091	2.028	2.019	0.092	1.954	1.833	1.865	1.9	0.094	1.772	1.598	1.674	1.59	0.095	1.52567	1.931	2.035	2.005	0.093	1.89733	1.977	2.181	2.008
	1 day, 13:15:12	1.606	1.625	1.607	0.092	1.52067	1.589	1.639	1.601	0.093	1.51667	1.742	1.766	0.826	0.093	1.35167	1.779	1.76	1.861	0.091	1.709	1.668	1.635	1.615	0.092	1.54733	2.089	2.026	2.018	0.092	1.95233	1.833	1.863	1.9	0.094	1.77133	1.598	1.674	1.59	0.095	1.52567	1.93	2.036	1.933	0.093	1.87333	1.975	2.18	2.008
	1 day, 13:30:12	1.605	1.625	1.606	0.092	1.52	1.593	1.644	1.6	0.094	1.51833	1.734	1.763	0.837	0.093	1.35167	1.778	1.76	1.861	0.091	1.70867	1.67	1.636	1.617	0.092	1.549	2.088	2.026	2.018	0.092	1.952	1.832	1.864	1.9	0.094	1.77133	1.6	1.675	1.591	0.095	1.527	1.929	2.041	1.929	0.093	1.87333	1.974	2.179	2.007
	1 day, 13:45:12	1.604	1.625	1.606	0.092	1.51967	1.596	1.645	1.605	0.094	1.52133	1.728	1.761	0.842	0.093	1.35067	1.777	1.76	1.861	0.091	1.70833	1.671	1.637	1.619	0.092	1.55033	2.088	2.024	2.016	0.092	1.95067	1.831	1.863	1.9	0.094	1.77067	1.6	1.676	1.591	0.095	1.52733	1.927	2.048	1.926	0.093	1.874	1.972	2.176	2.007
	1 day, 14:00:12	1.602	1.624	1.605	0.092	1.51833	1.6	1.651	1.605	0.093	1.52567	1.73	1.758	0.848	0.093	1.35233	1.775	1.759	1.861	0.091	1.70733	1.672	1.639	1.619	0.092	1.55133	2.087	2.023	2.016	0.092	1.95	1.83	1.863	1.9	0.094	1.77033	1.601	1.677	1.59	0.095	1.52767	1.925	2.06	1.919	0.093	1.875	1.97	2.178	2.006
	1 day, 14:15:12	1.601	1.623	1.605	0.092	1.51767	1.6	1.654	1.607	0.093	1.52733	1.73	1.756	0.852	0.093	1.353	1.773	1.759	1.861	0.091	1.70667	1.673	1.64	1.622	0.092	1.553	2.087	2.023	2.017	0.091	1.95133	1.829	1.861	1.9	0.094	1.76933	1.601	1.677	1.591	0.095	1.528	1.922	2.061	1.909	0.093	1.871	1.968	2.175	2.006
	1 day, 14:30:12	1.6	1.623	1.605	0.092	1.51733	1.601	1.657	1.607	0.094	1.52767	1.734	1.754	0.859	0.093	1.356	1.772	1.758	1.861	0.091	1.706	1.676	1.64	1.623	0.092	1.55433	2.086	2.022	2.016	0.092	1.94933	1.829	1.861	1.9	0.094	1.76933	1.601	1.678	1.591	0.095	1.52833	1.919	2.066	1.904	0.093	1.87	1.967	2.175	2.006
	1 day, 14:45:12	1.599	1.623	1.605	0.092	1.517	1.603	1.662	1.609	0.093	1.53167	1.732	1.751	0.86	0.093	1.35467	1.77	1.758	1.861	0.091	1.70533	1.677	1.642	1.623	0.092	1.55533	2.085	2.022	2.015	0.091	1.94967	1.827	1.861	1.9	0.094	1.76867	1.602	1.679	1.591	0.095	1.529	1.918	2.067	1.898	0.093	1.868	1.965	2.178	2.005
	1 day, 15:00:12	1.598	1.623	1.605	0.092	1.51667	1.603	1.663	1.611	0.094	1.53167	1.73	1.749	0.881	0.093	1.36033	1.768	1.758	1.861	0.091	1.70467	1.678	1.643	1.623	0.092	1.556	2.085	2.021	2.014	0.092	1.948	1.827	1.86	1.899	0.094	1.768	1.602	1.68	1.592	0.095	1.52967	1.914	2.069	1.899	0.093	1.86767	1.964	2.177	2.005
	1 day, 15:15:12	1.596	1.622	1.604	0.092	1.51533	1.607	1.668	1.613	0.094	1.53533	1.727	1.747	0.904	0.093	1.36633	1.767	1.757	1.861	0.091	1.704	1.679	1.644	1.624	0.092	1.557	2.084	2.02	2.014	0.092	1.94733	1.826	1.859	1.899	0.094	1.76733	1.604	1.68	1.593	0.095	1.53067	1.911	2.072	1.896	0.093	1.86667	1.962	2.176	2.004
	1 day, 15:30:12	1.595	1.623	1.603	0.092	1.515	1.605	1.669	1.613	0.093	1.536	1.718	1.745	0.92	0.093	1.368	1.765	1.757	1.861	0.091	1.70333	1.68	1.645	1.625	0.092	1.558	2.083	2.02	2.012	0.091	1.94733	1.824	1.858	1.898	0.094	1.766	1.604	1.681	1.593	0.095	1.531	1.912	2.051	1.894	0.093	1.85933	1.96	2.172	2.003
	1 day, 15:45:12	1.593	1.622	1.603	0.092	1.514	1.609	1.671	1.615	0.094	1.53767	1.714	1.742	0.936	0.093	1.371	1.764	1.756	1.862	0.091	1.703	1.68	1.645	1.626	0.092	1.55833	2.083	2.018	2.011	0.091	1.94633	1.824	1.858	1.898	0.094	1.766	1.605	1.682	1.593	0.095	1.53167	1.912	2.03	1.893	0.093	1.852	1.959	2.176	2.003
	1 day, 16:00:12	1.593	1.621	1.603	0.092	1.51367	1.61	1.672	1.616	0.093	1.53967	1.712	1.74	0.956	0.093	1.37633	1.762	1.756	1.862	0.091	1.70233	1.682	1.646	1.627	0.092	1.55967	2.083	2.017	2.009	0.091	1.94533	1.823	1.858	1.899	0.094	1.766	1.605	1.683	1.594	0.095	1.53233	1.909	2.026	1.893	0.093	1.84967	1.957	2.171	2.002
	1 day, 16:15:12	1.591	1.621	1.603	0.092	1.513	1.615	1.671	1.619	0.094	1.541	1.71	1.738	0.979	0.093	1.38267	1.761	1.756	1.862	0.091	1.702	1.682	1.647	1.628	0.092	1.56033	2.083	2.017	2.006	0.092	1.94333	1.822	1.857	1.899	0.094	1.76533	1.605	1.684	1.595	0.095	1.533	1.908	2.025	1.894	0.093	1.84933	1.955	2.173	2.001
	1 day, 16:30:12	1.59	1.62	1.602	0.092	1.512	1.615	1.676	1.617	0.094	1.542	1.708	1.735	1.004	0.093	1.38933	1.759	1.755	1.862	0.091	1.701	1.683	1.648	1.628	0.092	1.561	2.082	2.016	2.005	0.092	1.94233	1.821	1.856	1.898	0.095	1.76333	1.606	1.684	1.595	0.095	1.53333	1.903	2.029	1.895	0.093	1.84933	1.954	2.173	2.001
	1 day, 16:45:12	1.589	1.62	1.602	0.092	1.51167	1.617	1.677	1.624	0.093	1.54633	1.705	1.733	1.03	0.093	1.39633	1.758	1.754	1.862	0.091	1.70033	1.684	1.649	1.629	0.092	1.562	2.081	2.015	2.004	0.092	1.94133	1.82	1.855	1.897	0.094	1.76333	1.607	1.685	1.595	0.095	1.534	1.901	2.029	1.894	0.093	1.84833	1.952	2.169	2
	1 day, 17:00:12	1.588	1.619	1.601	0.092	1.51067	1.619	1.683	1.62	0.093	1.54767	1.703	1.732	1.055	0.093	1.40367	1.756	1.754	1.862	0.091	1.69967	1.684	1.649	1.629	0.092	1.562	2.081	2.014	2.004	0.091	1.942	1.819	1.854	1.897	0.094	1.76267	1.608	1.686	1.595	0.095	1.53467	1.9	2.028	1.893	0.093	1.84733	1.95	2.171	2
	1 day, 17:15:12	1.586	1.619	1.601	0.092	1.51	1.621	1.687	1.628	0.093	1.55233	1.7	1.73	1.078	0.093	1.40967	1.754	1.753	1.862	0.091	1.69867	1.685	1.65	1.631	0.092	1.56333	2.08	2.014	2.003	0.091	1.94133	1.818	1.853	1.897	0.094	1.762	1.609	1.687	1.594	0.095	1.535	1.899	2.027	1.893	0.093	1.84667	1.948	2.171	1.999
	1 day, 17:30:12	1.585	1.619	1.601	0.092	1.50967	1.625	1.688	1.624	0.093	1.55267	1.698	1.728	1.1	0.093	1.41567	1.753	1.752	1.862	0.091	1.698	1.685	1.651	1.632	0.092	1.564	2.08	2.013	2.002	0.091	1.94067	1.817	1.853	1.896	0.095	1.76033	1.609	1.688	1.597	0.095	1.53633	1.898	2.027	1.894	0.093	1.84667	1.947	2.169	1.998
	1 day, 17:45:12	1.584	1.618	1.6	0.092	1.50867	1.623	1.688	1.633	0.094	1.554	1.697	1.727	1.121	0.093	1.422	1.752	1.752	1.862	0.091	1.69767	1.685	1.651	1.632	0.092	1.564	2.079	2.012	2.002	0.092	1.939	1.816	1.852	1.896	0.094	1.76067	1.609	1.688	1.596	0.095	1.536	1.898	2.026	1.895	0.093	1.84667	1.945	2.168	1.998
	1 day, 18:00:12	1.583	1.618	1.6	0.092	1.50833	1.626	1.695	1.625	0.094	1.55467	1.695	1.725	1.141	0.093	1.42733	1.75	1.751	1.862	0.091	1.69667	1.686	1.652	1.632	0.092	1.56467	2.079	2.01	2.001	0.092	1.938	1.815	1.851	1.895	0.095	1.75867	1.611	1.689	1.598	0.095	1.53767	1.897	2.025	1.894	0.093	1.84567	1.944	2.168	1.998
	1 day, 18:15:12	1.581	1.617	1.599	0.092	1.507	1.626	1.698	1.633	0.093	1.55933	1.693	1.724	1.161	0.093	1.433	1.748	1.751	1.862	0.091	1.696	1.686	1.653	1.633	0.092	1.56533	2.078	2.009	2	0.092	1.937	1.814	1.85	1.895	0.094	1.759	1.611	1.689	1.596	0.095	1.537	1.895	2.021	1.893	0.093	1.84333	1.942	2.165	1.997
	1 day, 18:30:12	1.58	1.616	1.599	0.092	1.50633	1.631	1.697	1.624	0.094	1.55667	1.691	1.723	1.179	0.093	1.438	1.747	1.75	1.862	0.091	1.69533	1.686	1.653	1.633	0.092	1.56533	2.077	2.008	2	0.092	1.93633	1.813	1.849	1.895	0.094	1.75833	1.611	1.69	1.598	0.095	1.538	1.893	2.018	1.893	0.093	1.84167	1.94	2.163	1.996
	1 day, 18:45:12	1.579	1.616	1.598	0.092	1.50567	1.629	1.703	1.633	0.093	1.562	1.689	1.722	1.197	0.093	1.443	1.745	1.749	1.862	0.091	1.69433	1.686	1.654	1.634	0.092	1.566	2.077	2.007	1.998	0.091	1.93633	1.812	1.847	1.894	0.094	1.757	1.611	1.691	1.598	0.095	1.53833	1.892	2.015	1.892	0.093	1.84	1.938	2.165	1.996
	1 day, 19:00:12	1.578	1.615	1.598	0.092	1.505	1.629	1.699	1.624	0.094	1.55667	1.686	1.721	1.212	0.093	1.44667	1.744	1.749	1.862	0.091	1.694	1.687	1.655	1.635	0.092	1.567	2.075	2.006	1.996	0.092	1.93367	1.811	1.847	1.893	0.094	1.75633	1.612	1.692	1.599	0.095	1.53933	1.889	2.018	1.892	0.093	1.84	1.936	2.159	1.995
	1 day, 19:15:12	1.576	1.614	1.597	0.092	1.50367	1.629	1.703	1.631	0.094	1.56033	1.684	1.72	1.226	0.093	1.45033	1.742	1.748	1.862	0.091	1.693	1.687	1.656	1.634	0.092	1.567	2.074	2.005	1.996	0.092	1.933	1.81	1.845	1.893	0.094	1.75533	1.613	1.693	1.6	0.095	1.54033	1.884	2.018	1.891	0.093	1.838	1.934	2.163	1.994
	1 day, 19:30:12	1.575	1.613	1.597	0.092	1.503	1.627	1.698	1.623	0.094	1.55533	1.681	1.72	1.237	0.093	1.453	1.741	1.748	1.861	0.091	1.69233	1.688	1.656	1.635	0.092	1.56767	2.073	2.004	1.995	0.092	1.932	1.809	1.844	1.892	0.094	1.75433	1.613	1.693	1.599	0.095	1.54	1.88	2.019	1.89	0.093	1.83667	1.933	2.159	1.994
	1 day, 19:45:12	1.574	1.613	1.596	0.092	1.50233	1.629	1.701	1.628	0.094	1.55867	1.679	1.72	1.248	0.093	1.456	1.74	1.747	1.862	0.091	1.692	1.688	1.657	1.635	0.092	1.568	2.072	2.003	1.994	0.092	1.931	1.808	1.844	1.892	0.094	1.754	1.614	1.694	1.601	0.095	1.54133	1.879	2.019	1.889	0.093	1.836	1.931	2.16	1.993
	1 day, 20:00:12	1.572	1.612	1.596	0.092	1.50133	1.628	1.696	1.622	0.093	1.55567	1.677	1.718	1.256	0.093	1.45733	1.738	1.746	1.861	0.091	1.69067	1.688	1.657	1.636	0.092	1.56833	2.069	2.002	1.993	0.092	1.92933	1.807	1.843	1.891	0.094	1.753	1.614	1.695	1.599	0.095	1.541	1.87	2.019	1.888	0.093	1.83267	1.929	2.157	1.993
	1 day, 20:15:12	1.57	1.612	1.595	0.092	1.50033	1.628	1.702	1.621	0.093	1.55733	1.674	1.716	1.263	0.093	1.458	1.736	1.746	1.861	0.091	1.69	1.688	1.658	1.636	0.092	1.56867	2.068	2	1.992	0.092	1.928	1.806	1.842	1.891	0.094	1.75233	1.615	1.695	1.601	0.095	1.542	1.864	2.017	1.887	0.093	1.82967	1.927	2.156	1.992
	1 day, 20:30:12	1.569	1.611	1.595	0.092	1.49967	1.628	1.696	1.617	0.093	1.554	1.672	1.715	1.269	0.093	1.459	1.735	1.745	1.861	0.091	1.68933	1.689	1.658	1.637	0.092	1.56933	2.065	2	1.991	0.092	1.92667	1.805	1.841	1.89	0.094	1.75133	1.616	1.696	1.601	0.095	1.54267	1.869	2.017	1.885	0.093	1.83067	1.926	2.155	1.992
	1 day, 20:45:12	1.568	1.61	1.594	0.092	1.49867	1.629	1.699	1.617	0.093	1.55533	1.67	1.714	1.272	0.093	1.459	1.733	1.744	1.861	0.091	1.68833	1.689	1.658	1.637	0.092	1.56933	2.063	1.997	1.989	0.091	1.92533	1.804	1.841	1.889	0.094	1.75067	1.616	1.696	1.602	0.095	1.543	1.857	2.015	1.884	0.093	1.82567	1.923	2.155	1.991
	1 day, 21:00:12	1.566	1.609	1.594	0.092	1.49767	1.632	1.694	1.615	0.094	1.553	1.667	1.713	1.276	0.093	1.459	1.732	1.743	1.861	0.091	1.68767	1.69	1.66	1.638	0.092	1.57067	2.062	1.996	1.987	0.092	1.923	1.803	1.84	1.889	0.094	1.75	1.617	1.697	1.603	0.095	1.544	1.854	2.013	1.883	0.093	1.82367	1.922	2.153	1.99
	1 day, 21:15:12	1.565	1.609	1.593	0.092	1.497	1.628	1.692	1.612	0.093	1.551	1.665	1.713	1.276	0.093	1.45833	1.73	1.742	1.861	0.091	1.68667	1.691	1.66	1.638	0.092	1.571	2.059	1.994	1.984	0.092	1.92033	1.802	1.839	1.888	0.095	1.748	1.618	1.698	1.602	0.095	1.54433	1.851	2.013	1.881	0.093	1.822	1.92	2.154	1.99
	1 day, 21:30:12	1.563	1.608	1.593	0.092	1.496	1.637	1.69	1.61	0.093	1.55267	1.663	1.712	1.277	0.093	1.45767	1.729	1.742	1.86	0.091	1.686	1.691	1.661	1.639	0.092	1.57167	2.058	1.993	1.983	0.092	1.91933	1.8	1.838	1.888	0.094	1.748	1.619	1.698	1.603	0.095	1.545	1.846	2.012	1.88	0.093	1.81967	1.919	2.152	1.99
	1 day, 21:45:12	1.561	1.607	1.592	0.092	1.49467	1.624	1.685	1.607	0.093	1.54567	1.662	1.712	1.277	0.093	1.45733	1.727	1.741	1.86	0.091	1.685	1.691	1.661	1.639	0.092	1.57167	2.057	1.992	1.982	0.092	1.91833	1.8	1.838	1.888	0.094	1.748	1.619	1.699	1.602	0.095	1.545	1.839	2.011	1.879	0.093	1.81667	1.917	2.15	1.989
	1 day, 22:00:12	1.56	1.606	1.591	0.092	1.49367	1.63	1.686	1.602	0.094	1.54533	1.661	1.711	1.276	0.093	1.45633	1.726	1.74	1.86	0.091	1.68433	1.691	1.663	1.639	0.092	1.57233	2.056	1.99	1.98	0.092	1.91667	1.798	1.837	1.887	0.094	1.74667	1.62	1.7	1.605	0.095	1.54667	1.836	2.009	1.879	0.093	1.815	1.915	2.152	1.988
	1 day, 22:15:12	1.558	1.605	1.59	0.092	1.49233	1.62	1.683	1.603	0.093	1.54233	1.659	1.71	1.274	0.093	1.45467	1.724	1.739	1.86	0.091	1.68333	1.691	1.663	1.64	0.092	1.57267	2.055	1.987	1.978	0.092	1.91467	1.797	1.837	1.886	0.094	1.746	1.621	1.7	1.604	0.095	1.54667	1.837	2.008	1.877	0.093	1.81433	1.913	2.148	1.987
	1 day, 22:30:12	1.556	1.605	1.59	0.092	1.49167	1.625	1.68	1.596	0.093	1.54067	1.657	1.709	1.272	0.093	1.453	1.723	1.739	1.859	0.091	1.68267	1.691	1.664	1.64	0.092	1.573	2.054	1.985	1.974	0.092	1.91233	1.796	1.835	1.885	0.094	1.74467	1.622	1.701	1.605	0.095	1.54767	1.839	2.007	1.876	0.093	1.81433	1.911	2.15	1.986
	1 day, 22:45:12	1.554	1.604	1.589	0.092	1.49033	1.618	1.676	1.597	0.093	1.53733	1.655	1.707	1.269	0.093	1.45067	1.721	1.738	1.859	0.091	1.68167	1.692	1.664	1.64	0.092	1.57333	2.054	1.984	1.973	0.092	1.91167	1.795	1.835	1.885	0.094	1.74433	1.622	1.701	1.607	0.095	1.54833	1.835	2.007	1.875	0.093	1.81267	1.909	2.148	1.986
	1 day, 23:00:12	1.553	1.603	1.588	0.092	1.48933	1.619	1.671	1.596	0.093	1.53567	1.652	1.706	1.266	0.093	1.44833	1.72	1.737	1.859	0.091	1.681	1.692	1.665	1.64	0.092	1.57367	2.053	1.982	1.971	0.092	1.91	1.794	1.834	1.884	0.094	1.74333	1.623	1.701	1.605	0.095	1.548	1.833	2.007	1.874	0.093	1.81167	1.908	2.143	1.986
	1 day, 23:15:12	1.551	1.603	1.588	0.092	1.48867	1.613	1.675	1.593	0.093	1.534	1.651	1.705	1.263	0.093	1.44667	1.718	1.736	1.858	0.091	1.67967	1.693	1.665	1.641	0.092	1.57433	2.053	1.981	1.97	0.092	1.90933	1.793	1.833	1.883	0.094	1.74233	1.623	1.702	1.607	0.095	1.549	1.828	2.007	1.873	0.093	1.80967	1.906	2.147	1.985
	1 day, 23:30:12	1.55	1.602	1.587	0.092	1.48767	1.613	1.669	1.592	0.093	1.53167	1.649	1.704	1.259	0.093	1.44433	1.717	1.735	1.858	0.091	1.679	1.693	1.666	1.641	0.092	1.57467	2.055	1.979	1.968	0.092	1.90867	1.791	1.832	1.882	0.094	1.741	1.623	1.702	1.606	0.095	1.54867	1.823	2.006	1.873	0.092	1.80867	1.904	2.146	1.984
	1 day, 23:45:12	1.548	1.601	1.587	0.092	1.48667	1.614	1.668	1.59	0.093	1.531	1.647	1.704	1.256	0.093	1.44267	1.715	1.734	1.858	0.091	1.678	1.693	1.666	1.641	0.092	1.57467	2.054	1.976	1.966	0.092	1.90667	1.79	1.831	1.883	0.094	1.74067	1.624	1.703	1.606	0.095	1.54933	1.82	2.003	1.871	0.093	1.805	1.902	2.143	1.983
	2 days, 0:00:12	1.546	1.601	1.586	0.092	1.48567	1.61	1.672	1.591	0.093	1.53133	1.645	1.704	1.252	0.093	1.44067	1.714	1.733	1.857	0.091	1.677	1.694	1.667	1.641	0.092	1.57533	2.053	1.972	1.965	0.092	1.90467	1.789	1.83	1.882	0.094	1.73967	1.625	1.704	1.609	0.095	1.551	1.814	2.002	1.87	0.093	1.80233	1.9	2.144	1.983
	2 days, 0:15:12	1.545	1.6	1.585	0.092	1.48467	1.609	1.671	1.587	0.093	1.52933	1.643	1.703	1.249	0.093	1.43867	1.712	1.733	1.857	0.091	1.67633	1.694	1.668	1.642	0.092	1.576	2.053	1.97	1.965	0.092	1.904	1.788	1.829	1.882	0.094	1.739	1.625	1.704	1.608	0.095	1.55067	1.812	2	1.869	0.093	1.80067	1.898	2.141	1.982
	2 days, 0:30:12	1.543	1.599	1.585	0.092	1.48367	1.607	1.672	1.587	0.093	1.529	1.641	1.701	1.246	0.093	1.43633	1.711	1.731	1.856	0.091	1.675	1.694	1.668	1.642	0.092	1.576	2.053	1.966	1.963	0.092	1.902	1.787	1.828	1.881	0.094	1.738	1.625	1.704	1.609	0.095	1.551	1.806	2	1.868	0.093	1.79833	1.896	2.138	1.982
	2 days, 0:45:12	1.542	1.599	1.584	0.092	1.483	1.607	1.672	1.585	0.094	1.52733	1.639	1.7	1.243	0.093	1.43433	1.71	1.73	1.856	0.091	1.67433	1.695	1.668	1.643	0.092	1.57667	2.052	1.967	1.962	0.092	1.90167	1.786	1.828	1.88	0.094	1.73733	1.626	1.705	1.61	0.095	1.552	1.799	1.996	1.867	0.093	1.79433	1.894	2.14	1.981
	2 days, 1:00:12	1.54	1.598	1.583	0.092	1.48167	1.603	1.67	1.581	0.093	1.525	1.637	1.701	1.239	0.093	1.43267	1.708	1.73	1.855	0.091	1.67333	1.695	1.67	1.642	0.092	1.577	2.052	1.965	1.961	0.092	1.90067	1.784	1.827	1.88	0.094	1.73633	1.626	1.705	1.609	0.095	1.55167	1.789	1.992	1.866	0.093	1.78933	1.893	2.138	1.98
	2 days, 1:15:12	1.538	1.597	1.582	0.092	1.48033	1.601	1.671	1.578	0.093	1.52367	1.635	1.7	1.236	0.093	1.43067	1.706	1.729	1.855	0.091	1.67233	1.695	1.669	1.643	0.092	1.577	2.051	1.963	1.96	0.092	1.89933	1.783	1.827	1.879	0.094	1.73567	1.627	1.706	1.61	0.095	1.55267	1.784	1.988	1.865	0.093	1.786	1.891	2.139	1.98
	2 days, 1:30:12	1.537	1.597	1.581	0.092	1.47967	1.602	1.67	1.579	0.093	1.524	1.634	1.698	1.232	0.093	1.42833	1.705	1.728	1.854	0.091	1.67133	1.696	1.67	1.642	0.092	1.57733	2.051	1.96	1.96	0.092	1.89833	1.782	1.826	1.878	0.094	1.73467	1.627	1.706	1.612	0.095	1.55333	1.78	1.982	1.864	0.093	1.78233	1.889	2.137	1.979
	2 days, 1:45:12	1.535	1.596	1.581	0.092	1.47867	1.601	1.667	1.574	0.094	1.52	1.632	1.697	1.229	0.093	1.42633	1.703	1.727	1.854	0.091	1.67033	1.696	1.67	1.642	0.092	1.57733	2.05	1.958	1.958	0.092	1.89667	1.781	1.825	1.878	0.094	1.734	1.628	1.706	1.611	0.095	1.55333	1.776	1.978	1.863	0.093	1.77933	1.887	2.137	1.978
	2 days, 2:00:12	1.534	1.595	1.58	0.092	1.47767	1.602	1.663	1.572	0.093	1.51933	1.63	1.696	1.226	0.093	1.42433	1.702	1.726	1.853	0.091	1.66933	1.697	1.671	1.643	0.092	1.57833	2.05	1.955	1.958	0.092	1.89567	1.78	1.824	1.877	0.094	1.733	1.628	1.707	1.612	0.095	1.554	1.77	1.974	1.861	0.093	1.77533	1.885	2.132	1.977
	2 days, 2:15:12	1.533	1.594	1.579	0.092	1.47667	1.602	1.662	1.572	0.093	1.519	1.629	1.694	1.222	0.093	1.422	1.7	1.725	1.853	0.091	1.66833	1.697	1.67	1.641	0.092	1.57733	2.048	1.951	1.957	0.092	1.89333	1.778	1.824	1.876	0.094	1.732	1.628	1.707	1.612	0.095	1.554	1.766	1.967	1.86	0.093	1.77133	1.883	2.132	1.977
	2 days, 2:30:12	1.531	1.594	1.578	0.092	1.47567	1.603	1.661	1.573	0.093	1.51933	1.627	1.693	1.22	0.093	1.42033	1.699	1.724	1.852	0.091	1.66733	1.698	1.671	1.641	0.092	1.578	2.047	1.948	1.956	0.092	1.89167	1.777	1.823	1.875	0.094	1.731	1.629	1.707	1.612	0.095	1.55433	1.761	1.964	1.859	0.093	1.76833	1.881	2.131	1.976
	2 days, 2:45:12	1.53	1.593	1.577	0.092	1.47467	1.604	1.66	1.574	0.093	1.51967	1.625	1.692	1.216	0.093	1.418	1.697	1.722	1.851	0.091	1.66567	1.698	1.671	1.64	0.092	1.57767	2.047	1.946	1.955	0.092	1.89067	1.776	1.822	1.874	0.094	1.73	1.629	1.708	1.613	0.095	1.555	1.76	1.96	1.857	0.093	1.766	1.879	2.133	1.975
	2 days, 3:00:12	1.529	1.592	1.577	0.092	1.474	1.605	1.659	1.571	0.093	1.51867	1.623	1.691	1.213	0.093	1.416	1.696	1.722	1.851	0.091	1.66533	1.698	1.671	1.637	0.092	1.57667	2.046	1.944	1.956	0.091	1.891	1.774	1.822	1.873	0.094	1.729	1.629	1.708	1.613	0.095	1.555	1.759	1.959	1.856	0.092	1.766	1.877	2.128	1.974
	2 days, 3:15:12	1.528	1.592	1.576	0.092	1.47333	1.605	1.659	1.571	0.093	1.51867	1.622	1.692	1.21	0.093	1.415	1.694	1.721	1.85	0.091	1.664	1.698	1.67	1.635	0.092	1.57567	2.046	1.939	1.954	0.092	1.88767	1.773	1.821	1.872	0.094	1.728	1.629	1.708	1.614	0.095	1.55533	1.758	1.957	1.855	0.093	1.76367	1.876	2.13	1.974
	2 days, 3:30:12	1.526	1.591	1.575	0.092	1.472	1.604	1.656	1.568	0.093	1.51633	1.62	1.691	1.207	0.093	1.413	1.693	1.72	1.85	0.091	1.66333	1.698	1.671	1.634	0.092	1.57567	2.045	1.938	1.952	0.092	1.88633	1.772	1.821	1.872	0.094	1.72767	1.63	1.708	1.614	0.095	1.55567	1.757	1.955	1.853	0.093	1.762	1.874	2.131	1.973
	2 days, 3:45:12	1.525	1.59	1.574	0.092	1.471	1.604	1.654	1.567	0.093	1.51533	1.618	1.689	1.204	0.093	1.41067	1.691	1.719	1.849	0.091	1.662	1.699	1.671	1.631	0.092	1.575	2.046	1.937	1.95	0.092	1.88567	1.771	1.82	1.871	0.094	1.72667	1.63	1.707	1.614	0.095	1.55533	1.754	1.953	1.852	0.093	1.76	1.872	2.129	1.972
	2 days, 4:00:12	1.523	1.589	1.574	0.092	1.47	1.603	1.652	1.573	0.093	1.51633	1.616	1.688	1.202	0.093	1.409	1.69	1.718	1.848	0.091	1.661	1.699	1.671	1.628	0.092	1.574	2.045	1.936	1.949	0.092	1.88467	1.77	1.819	1.87	0.094	1.72567	1.63	1.707	1.615	0.095	1.55567	1.752	1.953	1.85	0.093	1.75867	1.87	2.128	1.972
	2 days, 4:15:12	1.522	1.589	1.573	0.092	1.46933	1.6	1.653	1.576	0.093	1.51667	1.614	1.687	1.198	0.093	1.40667	1.688	1.717	1.848	0.091	1.66	1.699	1.671	1.627	0.092	1.57367	2.044	1.937	1.948	0.092	1.88433	1.768	1.818	1.87	0.094	1.72467	1.63	1.706	1.615	0.095	1.55533	1.752	1.951	1.849	0.093	1.75767	1.868	2.128	1.97
	2 days, 4:30:12	1.52	1.588	1.572	0.092	1.468	1.598	1.657	1.581	0.093	1.519	1.612	1.686	1.194	0.093	1.40433	1.687	1.716	1.847	0.091	1.659	1.699	1.669	1.626	0.092	1.57267	2.044	1.937	1.946	0.092	1.88367	1.767	1.818	1.869	0.094	1.724	1.63	1.705	1.616	0.095	1.55533	1.75	1.95	1.847	0.093	1.756	1.866	2.127	1.97
	2 days, 4:45:12	1.519	1.587	1.571	0.092	1.467	1.598	1.66	1.6	0.093	1.52633	1.61	1.685	1.191	0.093	1.40233	1.685	1.715	1.846	0.091	1.65767	1.7	1.668	1.626	0.092	1.57267	2.044	1.936	1.945	0.092	1.883	1.766	1.817	1.868	0.094	1.723	1.631	1.703	1.617	0.095	1.55533	1.747	1.947	1.846	0.093	1.75367	1.864	2.126	1.969
	2 days, 5:00:12	1.517	1.586	1.571	0.092	1.466	1.595	1.662	1.62	0.093	1.53267	1.609	1.685	1.188	0.093	1.401	1.685	1.714	1.846	0.091	1.65733	1.7	1.665	1.626	0.092	1.57167	2.044	1.938	1.94	0.092	1.882	1.765	1.817	1.868	0.094	1.72267	1.63	1.702	1.617	0.095	1.55467	1.747	1.944	1.845	0.093	1.75233	1.862	2.124	1.968
	2 days, 5:15:12	1.516	1.586	1.57	0.092	1.46533	1.595	1.667	1.66	0.093	1.54767	1.607	1.683	1.185	0.093	1.39867	1.683	1.713	1.845	0.091	1.656	1.701	1.663	1.622	0.092	1.57	2.044	1.937	1.934	0.092	1.87967	1.763	1.816	1.866	0.094	1.721	1.63	1.7	1.617	0.095	1.554	1.745	1.941	1.843	0.093	1.75	1.861	2.123	1.968
	2 days, 5:30:12	1.514	1.585	1.569	0.092	1.464	1.593	1.673	1.795	0.093	1.594	1.605	1.681	1.181	0.093	1.396	1.681	1.712	1.844	0.091	1.65467	1.701	1.66	1.624	0.092	1.56967	2.044	1.937	1.93	0.092	1.87833	1.762	1.815	1.865	0.094	1.72	1.631	1.698	1.617	0.095	1.55367	1.745	1.937	1.841	0.092	1.749	1.858	2.122	1.967
	2 days, 5:45:12	1.513	1.584	1.568	0.092	1.463	1.594	1.687	2.118	0.093	1.70667	1.603	1.679	1.177	0.092	1.39433	1.68	1.711	1.843	0.091	1.65367	1.701	1.657	1.626	0.092	1.56933	2.045	1.932	1.93	0.091	1.878	1.761	1.815	1.865	0.094	1.71967	1.63	1.696	1.618	0.095	1.553	1.745	1.933	1.84	0.092	1.74733	1.857	2.121	1.966
	2 days, 6:00:12	1.512	1.583	1.567	0.092	1.462	1.594	1.69	2.178	0.093	1.72767	1.601	1.677	1.173	0.093	1.39067	1.679	1.71	1.843	0.091	1.653	1.701	1.655	1.624	0.092	1.568	2.044	1.93	1.93	0.092	1.876	1.76	1.814	1.864	0.094	1.71867	1.63	1.695	1.617	0.095	1.55233	1.743	1.929	1.838	0.093	1.74367	1.855	2.122	1.965
	2 days, 6:15:12	1.51	1.582	1.567	0.092	1.461	1.596	1.752	2.05	0.093	1.70633	1.599	1.677	1.17	0.092	1.39	1.677	1.709	1.842	0.091	1.65167	1.701	1.652	1.618	0.092	1.565	2.044	1.929	1.931	0.091	1.877	1.758	1.813	1.863	0.094	1.71733	1.63	1.692	1.617	0.095	1.55133	1.742	1.924	1.836	0.092	1.742	1.853	2.118	1.964
	2 days, 6:30:12	1.509	1.581	1.566	0.092	1.46	1.604	1.866	2.064	0.093	1.75167	1.597	1.675	1.167	0.093	1.38667	1.675	1.708	1.841	0.091	1.65033	1.701	1.65	1.629	0.092	1.568	2.044	1.927	1.932	0.092	1.87567	1.757	1.813	1.862	0.094	1.71667	1.63	1.69	1.618	0.095	1.551	1.742	1.92	1.834	0.093	1.739	1.851	2.12	1.964
	2 days, 6:45:12	1.508	1.581	1.565	0.092	1.45933	1.603	1.977	2.05	0.093	1.78367	1.595	1.672	1.164	0.093	1.384	1.674	1.707	1.841	0.091	1.64967	1.701	1.649	1.666	0.092	1.58	2.042	1.925	1.93	0.092	1.87367	1.755	1.812	1.861	0.094	1.71533	1.63	1.688	1.618	0.095	1.55033	1.74	1.916	1.832	0.093	1.73633	1.849	2.116	1.962
	2 days, 7:00:12	1.506	1.58	1.564	0.092	1.458	1.607	2.044	2.017	0.093	1.79633	1.593	1.669	1.161	0.093	1.38133	1.673	1.706	1.84	0.091	1.64867	1.702	1.647	1.708	0.092	1.59367	2.042	1.922	1.927	0.091	1.87267	1.754	1.812	1.86	0.094	1.71467	1.629	1.685	1.618	0.095	1.549	1.738	1.912	1.83	0.093	1.73367	1.847	2.116	1.962
	2 days, 7:15:12	1.504	1.579	1.563	0.092	1.45667	1.615	2.064	2.007	0.093	1.80233	1.591	1.667	1.158	0.092	1.38	1.671	1.705	1.839	0.091	1.64733	1.702	1.639	1.743	0.092	1.60267	2.041	1.918	1.924	0.091	1.87	1.752	1.811	1.859	0.094	1.71333	1.629	1.683	1.618	0.095	1.54833	1.736	1.908	1.829	0.092	1.73233	1.846	2.116	1.961
	2 days, 7:30:12	1.503	1.579	1.562	0.092	1.456	1.626	1.989	2.001	0.093	1.779	1.589	1.665	1.154	0.093	1.37633	1.67	1.705	1.839	0.091	1.647	1.702	1.647	1.808	0.092	1.627	2.04	1.914	1.923	0.092	1.867	1.751	1.811	1.859	0.094	1.713	1.629	1.681	1.617	0.095	1.54733	1.734	1.904	1.826	0.093	1.72833	1.844	2.114	1.96
	2 days, 7:45:12	1.501	1.578	1.561	0.092	1.45467	1.636	1.966	2.009	0.093	1.77733	1.587	1.662	1.151	0.093	1.37367	1.668	1.704	1.838	0.091	1.64567	1.701	1.642	1.907	0.092	1.658	2.039	1.912	1.921	0.091	1.86633	1.75	1.81	1.858	0.094	1.712	1.628	1.678	1.617	0.095	1.546	1.716	1.899	1.823	0.093	1.71967	1.842	2.115	1.959
	2 days, 8:00:12	1.5	1.577	1.561	0.092	1.454	1.651	1.97	1.995	0.093	1.779	1.585	1.66	1.148	0.093	1.37133	1.666	1.703	1.837	0.091	1.64433	1.701	1.655	1.99	0.092	1.69	2.038	1.911	1.918	0.092	1.86367	1.748	1.81	1.857	0.094	1.711	1.628	1.675	1.618	0.095	1.54533	1.714	1.894	1.821	0.093	1.71667	1.841	2.111	1.959
	2 days, 8:15:12	1.498	1.576	1.56	0.092	1.45267	1.671	1.899	1.986	0.093	1.759	1.583	1.657	1.144	0.093	1.36833	1.665	1.702	1.836	0.091	1.64333	1.7	1.666	2.047	0.092	1.71233	2.033	1.907	1.915	0.092	1.85967	1.747	1.809	1.856	0.094	1.71	1.627	1.672	1.617	0.095	1.54367	1.712	1.889	1.819	0.093	1.71367	1.839	2.113	1.958
	2 days, 8:30:12	1.497	1.575	1.559	0.092	1.45167	1.625	1.95	1.966	0.093	1.754	1.581	1.655	1.142	0.093	1.36633	1.664	1.701	1.836	0.091	1.64267	1.7	1.692	2.096	0.092	1.73733	2.03	1.905	1.914	0.091	1.85867	1.746	1.809	1.855	0.094	1.70933	1.627	1.67	1.617	0.095	1.543	1.715	1.886	1.817	0.093	1.713	1.837	2.112	1.957
	2 days, 8:45:12	1.496	1.574	1.558	0.092	1.45067	1.668	1.986	1.99	0.093	1.78833	1.58	1.653	1.14	0.093	1.36467	1.662	1.7	1.835	0.091	1.64133	1.699	1.73	2.128	0.092	1.76033	2.028	1.902	1.911	0.091	1.856	1.744	1.808	1.853	0.094	1.70767	1.626	1.667	1.619	0.095	1.54233	1.717	1.882	1.814	0.093	1.71133	1.835	2.113	1.956
	2 days, 9:00:12	1.494	1.573	1.557	0.092	1.44933	1.714	1.941	1.985	0.093	1.787	1.577	1.651	1.138	0.093	1.36233	1.66	1.7	1.834	0.091	1.64033	1.697	1.793	2.159	0.093	1.79	2.027	1.9	1.91	0.091	1.85467	1.743	1.807	1.852	0.094	1.70667	1.625	1.664	1.617	0.095	1.54033	1.718	1.879	1.813	0.093	1.71033	1.833	2.111	1.955
	2 days, 9:15:12	1.493	1.573	1.556	0.092	1.44867	1.75	1.952	1.977	0.093	1.8	1.576	1.649	1.135	0.093	1.36033	1.659	1.699	1.833	0.091	1.63933	1.695	1.884	2.188	0.092	1.83033	2.026	1.898	1.907	0.091	1.85267	1.741	1.806	1.851	0.094	1.70533	1.625	1.661	1.616	0.095	1.539	1.718	1.876	1.81	0.093	1.70833	1.831	2.111	1.954
	2 days, 9:30:12	1.492	1.572	1.556	0.092	1.448	1.695	1.941	1.99	0.093	1.78233	1.574	1.647	1.133	0.093	1.35833	1.658	1.698	1.833	0.091	1.63867	1.693	1.982	2.208	0.093	1.868	2.024	1.896	1.906	0.092	1.85	1.74	1.806	1.85	0.094	1.70467	1.624	1.659	1.617	0.095	1.53833	1.718	1.873	1.808	0.093	1.70667	1.829	2.109	1.953
	2 days, 9:45:12	1.491	1.571	1.555	0.092	1.447	1.756	1.946	1.979	0.093	1.80067	1.572	1.645	1.13	0.093	1.356	1.657	1.697	1.832	0.091	1.63767	1.691	2.066	2.291	0.092	1.924	2.023	1.898	1.903	0.091	1.85033	1.738	1.805	1.849	0.094	1.70333	1.624	1.657	1.616	0.095	1.53733	1.718	1.869	1.806	0.093	1.70467	1.827	2.106	1.952
	2 days, 10:00:12	1.489	1.57	1.554	0.092	1.44567	1.687	1.943	1.988	0.093	1.77967	1.57	1.643	1.127	0.093	1.35367	1.655	1.696	1.831	0.091	1.63633	1.69	2.115	2.311	0.092	1.94667	2.024	1.903	1.901	0.092	1.85067	1.737	1.804	1.848	0.094	1.70233	1.624	1.653	1.615	0.095	1.53567	1.718	1.866	1.804	0.093	1.703	1.825	2.108	1.951
	2 days, 10:15:12	1.488	1.569	1.554	0.092	1.445	1.727	1.927	1.965	0.093	1.78	1.568	1.641	1.124	0.092	1.35233	1.654	1.695	1.831	0.091	1.63567	1.688	2.142	2.329	0.092	1.961	2.022	1.907	1.899	0.092	1.85067	1.736	1.804	1.847	0.094	1.70167	1.623	1.648	1.615	0.095	1.53367	1.717	1.862	1.801	0.093	1.70033	1.823	2.104	1.95
	2 days, 10:30:12	1.487	1.568	1.553	0.092	1.444	1.677	1.96	1.971	0.093	1.77633	1.566	1.638	1.122	0.093	1.349	1.652	1.694	1.83	0.091	1.63433	1.686	2.176	2.348	0.092	1.978	2.022	1.908	1.897	0.091	1.85133	1.734	1.803	1.846	0.094	1.70033	1.622	1.645	1.614	0.095	1.532	1.717	1.859	1.799	0.093	1.69867	1.821	2.102	1.949
	2 days, 10:45:12	1.486	1.568	1.552	0.092	1.44333	1.676	1.938	1.964	0.093	1.76633	1.564	1.636	1.12	0.092	1.348	1.651	1.693	1.829	0.091	1.63333	1.685	2.191	2.372	0.092	1.99067	2.021	1.907	1.894	0.092	1.84867	1.733	1.803	1.844	0.094	1.69933	1.622	1.641	1.614	0.095	1.53067	1.717	1.856	1.796	0.093	1.69667	1.819	2.104	1.948
	2 days, 11:00:12	1.485	1.566	1.551	0.092	1.442	1.688	1.927	1.942	0.093	1.75933	1.562	1.634	1.118	0.093	1.345	1.65	1.692	1.828	0.091	1.63233	1.684	2.209	2.394	0.092	2.00367	2.02	1.906	1.892	0.092	1.84733	1.732	1.802	1.843	0.094	1.69833	1.622	1.637	1.613	0.095	1.529	1.716	1.853	1.794	0.093	1.69467	1.817	2.102	1.947
	2 days, 11:15:12	1.484	1.565	1.551	0.092	1.44133	1.729	1.935	1.97	0.093	1.785	1.56	1.632	1.115	0.092	1.34367	1.649	1.692	1.827	0.091	1.63167	1.684	2.241	2.433	0.092	2.02733	2.018	1.905	1.89	0.092	1.84567	1.73	1.801	1.842	0.094	1.697	1.621	1.634	1.611	0.095	1.527	1.716	1.85	1.792	0.092	1.694	1.815	2.103	1.947
	2 days, 11:30:12	1.482	1.564	1.55	0.092	1.44	1.64	1.927	1.982	0.093	1.75667	1.558	1.63	1.114	0.092	1.342	1.647	1.691	1.826	0.091	1.63033	1.685	2.259	2.427	0.092	2.03167	2.016	1.907	1.889	0.091	1.84633	1.729	1.801	1.84	0.094	1.696	1.621	1.631	1.612	0.095	1.52633	1.715	1.846	1.789	0.092	1.69133	1.814	2.101	1.945
	2 days, 11:45:12	1.481	1.564	1.549	0.092	1.43933	1.721	1.893	1.974	0.093	1.76967	1.556	1.628	1.112	0.093	1.339	1.647	1.69	1.826	0.091	1.63	1.683	2.284	2.476	0.092	2.05567	2.014	1.907	1.887	0.092	1.844	1.727	1.8	1.84	0.094	1.695	1.62	1.629	1.611	0.095	1.525	1.715	1.844	1.786	0.093	1.68867	1.812	2.097	1.945
	2 days, 12:00:12	1.479	1.563	1.547	0.092	1.43767	1.716	1.92	1.94	0.093	1.76567	1.554	1.627	1.109	0.092	1.338	1.645	1.689	1.825	0.091	1.62867	1.682	2.338	2.571	0.092	2.105	2.012	1.91	1.884	0.092	1.84333	1.726	1.799	1.838	0.094	1.69367	1.619	1.627	1.611	0.095	1.524	1.715	1.84	1.783	0.092	1.68733	1.81	2.098	1.944
	2 days, 12:15:12	1.479	1.562	1.547	0.092	1.43733	1.722	1.923	1.964	0.093	1.77667	1.552	1.625	1.107	0.092	1.336	1.644	1.688	1.824	0.091	1.62767	1.684	2.487	2.6	0.092	2.165	2.009	1.911	1.882	0.091	1.843	1.724	1.799	1.837	0.094	1.69267	1.618	1.627	1.61	0.095	1.52333	1.714	1.838	1.781	0.092	1.68567	1.808	2.098	1.942
	2 days, 12:30:12	1.478	1.561	1.546	0.092	1.43633	1.733	1.91	1.97	0.093	1.778	1.551	1.624	1.106	0.092	1.335	1.644	1.687	1.824	0.091	1.62733	1.685	2.493	2.68	0.092	2.194	2.006	1.908	1.88	0.092	1.83933	1.722	1.798	1.836	0.094	1.69133	1.617	1.627	1.61	0.095	1.523	1.713	1.836	1.779	0.092	1.684	1.806	2.096	1.942
	2 days, 12:45:12	1.478	1.56	1.545	0.092	1.43567	1.683	1.901	1.957	0.093	1.754	1.549	1.623	1.104	0.092	1.33333	1.643	1.686	1.823	0.091	1.62633	1.686	2.516	2.713	0.092	2.213	2.005	1.905	1.878	0.092	1.83733	1.721	1.797	1.835	0.094	1.69033	1.615	1.625	1.61	0.095	1.52167	1.712	1.833	1.776	0.093	1.68067	1.805	2.094	1.941
	2 days, 13:00:12	1.477	1.559	1.544	0.092	1.43467	1.722	1.931	1.946	0.093	1.77333	1.548	1.62	1.103	0.092	1.33167	1.641	1.686	1.822	0.091	1.62533	1.687	2.532	2.751	0.092	2.23133	2.002	1.903	1.876	0.091	1.836	1.719	1.796	1.834	0.094	1.689	1.614	1.625	1.609	0.095	1.521	1.712	1.829	1.774	0.093	1.67867	1.803	2.095	1.94
	2 days, 13:15:12	1.476	1.558	1.543	0.092	1.43367	1.709	1.943	1.967	0.093	1.78	1.546	1.618	1.101	0.093	1.32867	1.641	1.685	1.821	0.091	1.62467	1.689	2.55	2.771	0.092	2.24467	1.999	1.901	1.874	0.091	1.83367	1.718	1.795	1.832	0.094	1.68767	1.613	1.626	1.61	0.095	1.52133	1.711	1.827	1.772	0.093	1.677	1.801	2.095	1.939
	2 days, 13:30:12	1.476	1.557	1.542	0.092	1.433	1.727	1.919	1.965	0.093	1.77733	1.544	1.616	1.1	0.092	1.328	1.64	1.684	1.82	0.091	1.62367	1.695	2.558	2.755	0.092	2.244	1.995	1.898	1.872	0.091	1.83067	1.716	1.795	1.832	0.094	1.687	1.612	1.626	1.61	0.095	1.521	1.71	1.823	1.768	0.092	1.675	1.799	2.091	1.937
	2 days, 13:45:12	1.475	1.556	1.542	0.092	1.43233	1.723	1.902	1.972	0.093	1.77267	1.542	1.614	1.098	0.092	1.326	1.639	1.683	1.819	0.091	1.62267	1.713	2.619	2.832	0.092	2.296	1.992	1.896	1.87	0.091	1.82833	1.715	1.794	1.831	0.094	1.686	1.611	1.627	1.61	0.095	1.521	1.709	1.821	1.766	0.092	1.67333	1.797	2.094	1.937
	2 days, 14:00:12	1.474	1.555	1.541	0.092	1.43133	1.723	1.896	1.942	0.093	1.76067	1.541	1.612	1.097	0.092	1.32467	1.638	1.682	1.818	0.091	1.62167	1.762	2.632	2.786	0.092	2.30133	1.983	1.894	1.868	0.091	1.824	1.713	1.793	1.829	0.094	1.68433	1.61	1.628	1.609	0.095	1.52067	1.708	1.818	1.763	0.092	1.671	1.795	2.09	1.935
	2 days, 14:15:12	1.473	1.555	1.54	0.092	1.43067	1.719	1.922	1.953	0.093	1.77167	1.539	1.609	1.095	0.092	1.32233	1.637	1.681	1.817	0.091	1.62067	1.829	2.655	2.596	0.092	2.268	1.98	1.893	1.867	0.091	1.82233	1.712	1.792	1.828	0.094	1.68333	1.609	1.629	1.608	0.095	1.52033	1.707	1.815	1.761	0.092	1.669	1.793	2.092	1.935
	2 days, 14:30:12	1.472	1.554	1.54	0.092	1.43	1.728	1.896	1.947	0.093	1.764	1.537	1.607	1.094	0.092	1.32067	1.636	1.681	1.816	0.091	1.62	1.888	2.689	2.467	0.092	2.256	1.977	1.89	1.865	0.091	1.81967	1.71	1.791	1.826	0.094	1.68167	1.608	1.631	1.607	0.095	1.52033	1.706	1.812	1.758	0.092	1.66667	1.791	2.089	1.933
	2 days, 14:45:12	1.471	1.553	1.539	0.092	1.429	1.72	1.93	1.936	0.093	1.769	1.536	1.605	1.093	0.092	1.31933	1.635	1.679	1.815	0.091	1.61867	1.937	2.719	2.461	0.092	2.28033	1.976	1.889	1.863	0.091	1.81833	1.709	1.79	1.825	0.094	1.68067	1.608	1.635	1.606	0.095	1.52133	1.705	1.81	1.756	0.092	1.665	1.789	2.089	1.933
	2 days, 15:00:12	1.47	1.552	1.538	0.092	1.428	1.724	1.938	1.943	0.093	1.77533	1.534	1.604	1.092	0.092	1.318	1.634	1.679	1.815	0.091	1.61833	1.972	2.707	2.452	0.092	2.285	1.974	1.887	1.861	0.092	1.81533	1.707	1.79	1.824	0.094	1.67967	1.606	1.636	1.605	0.095	1.52067	1.704	1.808	1.753	0.093	1.662	1.787	2.088	1.932
	2 days, 15:15:12	1.469	1.551	1.537	0.092	1.427	1.723	1.917	1.937	0.093	1.766	1.532	1.603	1.091	0.092	1.31667	1.633	1.678	1.813	0.091	1.617	2.006	2.77	2.414	0.092	2.30467	1.973	1.886	1.859	0.091	1.815	1.706	1.789	1.823	0.094	1.67867	1.605	1.639	1.606	0.095	1.52167	1.703	1.806	1.75	0.093	1.66	1.785	2.084	1.93
	2 days, 15:30:12	1.468	1.55	1.536	0.092	1.426	1.725	1.919	1.92	0.093	1.76167	1.53	1.602	1.09	0.092	1.31533	1.633	1.677	1.812	0.091	1.61633	2.03	2.803	2.383	0.092	2.31333	1.973	1.884	1.858	0.091	1.814	1.704	1.788	1.822	0.094	1.67733	1.603	1.642	1.606	0.095	1.522	1.702	1.803	1.747	0.092	1.65867	1.783	2.082	1.929
	2 days, 15:45:12	1.468	1.55	1.536	0.092	1.426	1.721	1.908	1.952	0.093	1.76733	1.528	1.599	1.088	0.092	1.313	1.631	1.676	1.811	0.091	1.615	2.062	2.769	2.412	0.092	2.32233	1.972	1.883	1.856	0.091	1.81267	1.703	1.787	1.82	0.094	1.676	1.602	1.642	1.606	0.095	1.52167	1.701	1.8	1.745	0.092	1.65667	1.781	2.085	1.928
	2 days, 16:00:12	1.466	1.549	1.535	0.092	1.42467	1.725	1.891	1.945	0.093	1.76067	1.527	1.597	1.088	0.092	1.312	1.63	1.675	1.81	0.091	1.614	2.104	2.796	2.391	0.092	2.33833	1.971	1.881	1.855	0.091	1.81133	1.702	1.787	1.819	0.094	1.67533	1.6	1.649	1.608	0.095	1.524	1.7	1.798	1.742	0.093	1.65367	1.779	2.083	1.927
	2 days, 16:15:12	1.466	1.548	1.534	0.092	1.424	1.721	1.926	1.931	0.093	1.76633	1.525	1.595	1.087	0.092	1.31033	1.629	1.674	1.809	0.091	1.613	2.141	2.771	2.376	0.092	2.33733	1.97	1.88	1.853	0.091	1.81	1.7	1.786	1.817	0.094	1.67367	1.597	1.652	1.609	0.095	1.52433	1.7	1.795	1.74	0.092	1.653	1.777	2.082	1.926
	2 days, 16:30:12	1.465	1.548	1.534	0.092	1.42367	1.722	1.903	1.928	0.093	1.758	1.524	1.592	1.085	0.092	1.30833	1.628	1.673	1.808	0.091	1.612	2.174	2.743	2.387	0.092	2.34267	1.969	1.877	1.852	0.091	1.80833	1.698	1.785	1.816	0.094	1.67233	1.595	1.658	1.61	0.095	1.526	1.698	1.792	1.737	0.092	1.65033	1.775	2.08	1.925
	2 days, 16:45:12	1.464	1.547	1.533	0.092	1.42267	1.714	1.904	1.944	0.093	1.761	1.522	1.59	1.083	0.092	1.30633	1.627	1.673	1.806	0.091	1.611	2.207	2.746	2.384	0.092	2.35367	1.968	1.875	1.85	0.091	1.80667	1.697	1.784	1.813	0.094	1.67067	1.593	1.658	1.614	0.095	1.52667	1.697	1.79	1.734	0.092	1.64833	1.774	2.08	1.924
	2 days, 17:00:12	1.464	1.546	1.533	0.092	1.42233	1.726	1.909	1.937	0.093	1.76433	1.52	1.587	1.082	0.092	1.30433	1.626	1.672	1.806	0.091	1.61033	2.238	2.725	2.368	0.092	2.35167	1.967	1.874	1.848	0.092	1.80433	1.695	1.783	1.813	0.094	1.66967	1.59	1.657	1.619	0.095	1.527	1.696	1.788	1.732	0.092	1.64667	1.772	2.077	1.923
	2 days, 17:15:12	1.463	1.545	1.532	0.092	1.42133	1.716	1.915	1.941	0.093	1.76433	1.518	1.584	1.08	0.092	1.302	1.625	1.671	1.804	0.091	1.609	2.248	2.562	2.329	0.092	2.28767	1.966	1.871	1.846	0.092	1.80233	1.694	1.782	1.811	0.094	1.66833	1.591	1.658	1.631	0.095	1.53167	1.695	1.785	1.729	0.092	1.64433	1.77	2.079	1.922
	2 days, 17:30:12	1.463	1.545	1.531	0.092	1.421	1.723	1.892	1.942	0.093	1.75933	1.516	1.581	1.079	0.092	1.3	1.624	1.67	1.803	0.091	1.608	2.264	2.503	2.345	0.092	2.27867	1.966	1.87	1.845	0.091	1.80267	1.692	1.781	1.809	0.093	1.66767	1.59	1.661	1.643	0.094	1.53733	1.694	1.783	1.726	0.092	1.64233	1.768	2.074	1.921
	2 days, 17:45:12	1.462	1.544	1.53	0.092	1.42	1.709	1.895	1.941	0.093	1.75533	1.514	1.577	1.078	0.092	1.29767	1.623	1.669	1.802	0.091	1.607	2.286	2.557	2.349	0.092	2.30533	1.964	1.869	1.843	0.091	1.801	1.69	1.78	1.808	0.094	1.66533	1.589	1.668	1.661	0.095	1.54433	1.693	1.781	1.724	0.092	1.64067	1.766	2.075	1.92
	2 days, 18:00:12	1.462	1.543	1.529	0.092	1.41933	1.723	1.91	1.908	0.093	1.754	1.512	1.574	1.077	0.092	1.29567	1.622	1.668	1.801	0.091	1.606	2.3	2.538	2.329	0.092	2.297	1.962	1.868	1.841	0.091	1.79933	1.689	1.78	1.807	0.094	1.66467	1.589	1.66	1.681	0.095	1.54833	1.692	1.78	1.721	0.092	1.639	1.765	2.072	1.919
	2 days, 18:15:12	1.461	1.543	1.528	0.092	1.41867	1.705	1.887	1.914	0.093	1.74233	1.511	1.571	1.076	0.092	1.294	1.621	1.668	1.8	0.091	1.60533	2.33	2.538	2.323	0.092	2.305	1.96	1.867	1.839	0.091	1.79767	1.688	1.779	1.805	0.094	1.66333	1.59	1.66	1.704	0.095	1.55633	1.69	1.777	1.718	0.092	1.63633	1.763	2.071	1.918
	2 days, 18:30:12	1.46	1.541	1.528	0.092	1.41767	1.718	1.898	1.914	0.093	1.75033	1.508	1.567	1.075	0.092	1.29133	1.62	1.667	1.799	0.091	1.60433	2.355	2.499	2.341	0.092	2.30633	1.958	1.865	1.838	0.091	1.796	1.686	1.778	1.804	0.094	1.662	1.589	1.664	1.74	0.095	1.56933	1.689	1.775	1.716	0.092	1.63467	1.761	2.068	1.917
	2 days, 18:45:12	1.459	1.54	1.526	0.092	1.41633	1.703	1.891	1.925	0.093	1.74667	1.506	1.564	1.074	0.092	1.28933	1.619	1.666	1.798	0.091	1.60333	2.387	2.491	2.332	0.092	2.31133	1.958	1.866	1.836	0.091	1.79567	1.685	1.777	1.801	0.093	1.66133	1.59	1.667	1.763	0.094	1.57933	1.687	1.773	1.712	0.092	1.632	1.758	2.07	1.916
	2 days, 19:00:12	1.459	1.539	1.526	0.092	1.416	1.714	1.876	1.908	0.093	1.73967	1.505	1.56	1.074	0.092	1.28767	1.618	1.666	1.797	0.091	1.60267	2.419	2.481	2.328	0.092	2.31733	1.955	1.865	1.834	0.091	1.79367	1.683	1.776	1.801	0.094	1.65933	1.589	1.668	1.81	0.095	1.594	1.686	1.771	1.709	0.092	1.63	1.757	2.065	1.915
	2 days, 19:15:12	1.458	1.538	1.525	0.092	1.415	1.7	1.913	1.922	0.093	1.752	1.503	1.556	1.072	0.092	1.285	1.617	1.665	1.796	0.091	1.60167	2.642	2.517	2.328	0.092	2.40367	1.952	1.864	1.832	0.091	1.79167	1.681	1.775	1.799	0.093	1.65867	1.591	1.669	1.827	0.095	1.60067	1.685	1.77	1.706	0.092	1.62833	1.755	2.067	1.914
	2 days, 19:30:12	1.458	1.538	1.525	0.092	1.415	1.715	1.916	1.921	0.093	1.75767	1.501	1.553	1.071	0.092	1.283	1.616	1.664	1.795	0.091	1.60067	2.662	2.505	2.349	0.092	2.41333	1.951	1.862	1.83	0.092	1.789	1.68	1.775	1.798	0.094	1.657	1.592	1.67	1.879	0.095	1.61867	1.684	1.768	1.703	0.092	1.62633	1.753	2.065	1.914
	2 days, 19:45:12	1.458	1.536	1.524	0.092	1.414	1.701	1.927	1.902	0.093	1.75033	1.499	1.55	1.07	0.092	1.281	1.615	1.663	1.794	0.091	1.59967	2.689	2.469	2.349	0.092	2.41033	1.95	1.861	1.829	0.091	1.789	1.679	1.774	1.796	0.094	1.65567	1.593	1.673	1.912	0.095	1.631	1.683	1.766	1.701	0.092	1.62467	1.751	2.065	1.913
	2 days, 20:00:12	1.457	1.536	1.523	0.092	1.41333	1.711	1.873	1.899	0.093	1.73467	1.497	1.546	1.069	0.092	1.27867	1.614	1.662	1.793	0.091	1.59867	2.719	2.433	2.337	0.092	2.40433	1.947	1.859	1.827	0.091	1.78667	1.677	1.773	1.794	0.094	1.654	1.593	1.677	1.981	0.095	1.65533	1.682	1.764	1.698	0.092	1.62267	1.749	2.062	1.912
	2 days, 20:15:12	1.456	1.536	1.523	0.092	1.413	1.697	1.905	1.924	0.093	1.749	1.495	1.542	1.068	0.092	1.27633	1.613	1.661	1.792	0.091	1.59767	2.736	2.465	2.328	0.092	2.41767	1.945	1.857	1.825	0.091	1.78467	1.677	1.772	1.792	0.094	1.653	1.592	1.674	2.066	0.095	1.68233	1.681	1.762	1.694	0.092	1.62033	1.748	2.06	1.911
	2 days, 20:30:12	1.456	1.534	1.522	0.092	1.412	1.708	1.852	1.91	0.093	1.73033	1.493	1.539	1.067	0.092	1.27433	1.612	1.661	1.791	0.091	1.597	2.82	2.465	2.331	0.092	2.44667	1.943	1.856	1.823	0.091	1.783	1.675	1.771	1.791	0.094	1.65167	1.595	1.673	2.185	0.095	1.72267	1.68	1.76	1.692	0.092	1.61867	1.746	2.064	1.909
	2 days, 20:45:12	1.455	1.534	1.521	0.092	1.41133	1.697	1.886	1.917	0.093	1.74033	1.492	1.535	1.067	0.092	1.27267	1.611	1.66	1.79	0.091	1.596	2.72	2.437	2.331	0.093	2.403	1.941	1.855	1.822	0.091	1.78167	1.674	1.771	1.79	0.094	1.651	1.597	1.672	2.092	0.095	1.692	1.679	1.758	1.689	0.093	1.61567	1.744	2.063	1.909
	2 days, 21:00:12	1.454	1.533	1.521	0.092	1.41067	1.708	1.849	1.911	0.093	1.72967	1.49	1.531	1.065	0.092	1.27	1.61	1.659	1.789	0.091	1.595	2.583	2.448	2.318	0.092	2.35767	1.938	1.853	1.82	0.092	1.77833	1.673	1.77	1.788	0.094	1.64967	1.599	1.676	2.364	0.095	1.78467	1.678	1.756	1.687	0.092	1.615	1.742	2.061	1.908
	2 days, 21:15:12	1.453	1.533	1.52	0.092	1.41	1.693	1.891	1.893	0.093	1.73267	1.488	1.528	1.065	0.092	1.26833	1.609	1.658	1.788	0.091	1.594	2.536	2.449	2.312	0.092	2.34033	1.935	1.851	1.818	0.091	1.777	1.672	1.769	1.787	0.094	1.64867	1.601	1.675	2.299	0.095	1.76333	1.677	1.753	1.683	0.092	1.61233	1.74	2.061	1.907
	2 days, 21:30:12	1.452	1.532	1.519	0.092	1.409	1.705	1.902	1.879	0.093	1.73567	1.486	1.524	1.063	0.092	1.26567	1.609	1.658	1.787	0.091	1.59367	2.579	2.425	2.325	0.092	2.351	1.936	1.85	1.816	0.091	1.77633	1.67	1.768	1.785	0.094	1.647	1.604	1.68	2.444	0.095	1.81433	1.676	1.751	1.678	0.092	1.60967	1.738	2.059	1.906
	2 days, 21:45:12	1.452	1.53	1.519	0.092	1.40833	1.694	1.857	1.895	0.093	1.72233	1.483	1.52	1.063	0.092	1.26333	1.607	1.657	1.786	0.091	1.59233	2.56	2.415	2.314	0.092	2.33767	1.935	1.848	1.814	0.091	1.77467	1.669	1.767	1.783	0.093	1.64667	1.605	1.681	2.481	0.095	1.82733	1.675	1.749	1.674	0.092	1.60733	1.736	2.057	1.905
	2 days, 22:00:12	1.451	1.53	1.518	0.092	1.40767	1.7	1.883	1.9	0.093	1.73467	1.481	1.516	1.062	0.092	1.261	1.607	1.656	1.786	0.091	1.592	2.437	2.425	2.321	0.092	2.30233	1.933	1.846	1.812	0.091	1.77267	1.668	1.767	1.782	0.094	1.645	1.607	1.681	2.397	0.095	1.8	1.674	1.746	1.671	0.092	1.605	1.735	2.056	1.904
	2 days, 22:15:12	1.451	1.529	1.518	0.092	1.40733	1.69	1.899	1.879	0.093	1.72967	1.479	1.512	1.061	0.092	1.25867	1.606	1.655	1.784	0.091	1.59067	2.471	2.433	2.304	0.092	2.31067	1.931	1.844	1.81	0.091	1.77067	1.666	1.766	1.781	0.093	1.64467	1.609	1.681	2.424	0.095	1.80967	1.672	1.744	1.666	0.092	1.602	1.733	2.057	1.903
	2 days, 22:30:12	1.451	1.529	1.517	0.092	1.407	1.7	1.898	1.896	0.093	1.73833	1.477	1.508	1.062	0.092	1.257	1.605	1.654	1.784	0.091	1.59	2.475	2.412	2.311	0.092	2.30733	1.929	1.843	1.808	0.091	1.769	1.665	1.766	1.779	0.094	1.64267	1.613	1.679	2.343	0.095	1.78333	1.671	1.742	1.662	0.092	1.59967	1.732	2.054	1.902
	2 days, 22:45:12	1.45	1.528	1.517	0.092	1.40633	1.688	1.875	1.884	0.093	1.72267	1.475	1.505	1.061	0.092	1.255	1.604	1.653	1.783	0.091	1.589	2.425	2.405	2.302	0.092	2.28533	1.926	1.841	1.807	0.092	1.766	1.664	1.765	1.777	0.094	1.64133	1.626	1.679	2.341	0.095	1.787	1.67	1.739	1.658	0.092	1.597	1.73	2.053	1.901
	2 days, 23:00:12	1.449	1.527	1.516	0.092	1.40533	1.698	1.891	1.877	0.093	1.729	1.473	1.501	1.059	0.092	1.25233	1.603	1.653	1.781	0.091	1.588	2.429	2.398	2.3	0.092	2.28367	1.922	1.839	1.805	0.091	1.76433	1.662	1.764	1.776	0.094	1.64	1.629	1.68	2.298	0.094	1.775	1.669	1.737	1.654	0.092	1.59467	1.729	2.052	1.9
	2 days, 23:15:12	1.448	1.526	1.515	0.092	1.40433	1.685	1.903	1.867	0.093	1.72533	1.471	1.497	1.058	0.092	1.25	1.602	1.652	1.78	0.091	1.587	2.404	2.412	2.296	0.092	2.27867	1.916	1.837	1.804	0.091	1.76133	1.661	1.764	1.774	0.094	1.639	1.637	1.683	2.26	0.095	1.765	1.668	1.735	1.65	0.092	1.59233	1.727	2.051	1.899
	2 days, 23:30:12	1.448	1.525	1.514	0.092	1.40367	1.7	1.874	1.873	0.093	1.72267	1.469	1.494	1.058	0.092	1.24833	1.601	1.651	1.779	0.091	1.586	2.401	2.426	2.302	0.092	2.28433	1.915	1.836	1.801	0.091	1.75967	1.66	1.763	1.772	0.094	1.63767	1.646	1.683	2.279	0.095	1.77433	1.666	1.732	1.646	0.092	1.58933	1.725	2.05	1.898
	2 days, 23:45:12	1.448	1.524	1.514	0.092	1.40333	1.684	1.887	1.879	0.093	1.72367	1.467	1.489	1.058	0.092	1.246	1.6	1.65	1.778	0.091	1.585	2.395	2.417	2.292	0.092	2.276	1.911	1.834	1.799	0.091	1.757	1.659	1.762	1.771	0.094	1.63667	1.67	1.679	2.277	0.095	1.78033	1.665	1.73	1.642	0.092	1.587	1.724	2.046	1.897
	3 days, 0:00:12	1.447	1.524	1.513	0.092	1.40267	1.697	1.87	1.886	0.093	1.72467	1.465	1.486	1.057	0.092	1.244	1.599	1.649	1.777	0.091	1.584	2.381	2.412	2.304	0.092	2.27367	1.907	1.833	1.798	0.091	1.755	1.657	1.762	1.769	0.093	1.63633	1.678	1.679	2.276	0.095	1.78267	1.664	1.728	1.638	0.092	1.58467	1.722	2.047	1.896
Results
		2	3	4	5		6	7	8	9		10	11	12
	A	3.372	3.357	-0.009	3.887		6.215	10.483	-0.015	3.497		3.343	1.657	0.004	Max V [600]
		1	1	0.681	0.997		0.99	0.923	0.771	0.981		1	1	0.529	R-Squared [600]
		07:30:12	07:30:12	00:30:12	16:45:12		2 days, 6:30:12	2 days, 5:30:12	00:30:12	18:00:12		23:30:12	1 day, 16:45:12	12:00:12	t at Max V [600]
		05:02:24	05:02:13	?????	12:20:13		2 days, 1:50:47	2 days, 2:43:34	?????	14:55:15		17:47:14	1 day, 7:40:13	10:25:12	Lagtime [600]
	B	3.447	3.619	-0.013	5.789		5.733	-7.072	-0.015	4.881		4.085	4.293	-0.008	Max V [600]
		1	0.955	0.758	0.873		0.995	0.927	0.747	0.962		1	0.947	0.632	R-Squared [600]
		07:15:12	10:45:12	00:30:12	2 days, 19:00:12		2 days, 9:15:12	2 days, 14:15:12	00:30:12	15:45:12		20:30:12	16:45:12	00:30:12	t at Max V [600]
		05:02:30	06:19:03	?????	2 days, 12:11:59		2 days, 4:07:35	2 days, 20:08:33	?????	13:05:19		15:11:20	13:37:46	?????	Lagtime [600]
	C	3.291	4.123	-0.013	3.187		3.507	5.721	-0.011	6.203		5.048	6.108	-0.016	Max V [600]
		1	0.892	0.843	0.999		0.961	0.782	0.701	0.994		0.963	0.937	0.929	R-Squared [600]
		07:30:12	13:45:12	00:30:12	06:45:12		12:15:12	2 days, 21:15:12	00:30:12	17:15:12		19:00:12	17:15:12	00:30:12	t at Max V [600]
		05:02:41	09:23:35	?????	04:43:10		06:50:38	2 days, 14:49:28	?????	14:38:32		15:49:59	15:00:01	?????	Lagtime [600]
	D	3.967	3.595	-0.017	3.375		3.415	3.515	-0.015	4.743		3.369	3.742	-0.01	Max V [600]
		0.848	0.917	0.878	0.904		1	0.908	0.91	0.927		1	1	0.731	R-Squared [600]
		14:30:12	14:00:12	00:30:12	13:45:12		07:45:12	13:00:12	00:30:12	11:30:12		07:30:12	07:45:12	00:30:12	t at Max V [600]
		08:23:46	08:09:15	?????	07:26:06		05:11:34	06:55:03	?????	07:25:02		05:05:11	05:21:15	?????	Lagtime [600]
	E	3.271	4.048	-0.013	-0.007		-0.007	0.004	-0.007	0.007		-0.007	-0.011	0.007	Max V [600]
		1	0.983	0.799	0.756		0.781	0.5	0.488	0.714		0.644	0.701	0.893	R-Squared [600]
		22:45:12	16:30:12	00:30:12	00:30:12		00:30:12	2 days, 7:30:12	00:30:12	2 days, 7:45:12		00:30:12	00:30:12	1 day, 17:30:12	t at Max V [600]
		16:14:57	13:23:07	?????	?????		?????	2 days, 5:10:12	?????	2 days, 8:30:12		?????	?????	1 day, 17:24:12	Lagtime [600]
	F	4.267	4.44	-0.011	-0.005		-0.009	-0.009	-0.006	-0.007		-0.005	-0.007	-0.006	Max V [600]
		0.999	0.987	0.83	0.593		0.812	0.797	0.675	0.581		0.942	0.581	0.389	R-Squared [600]
		16:00:12	16:00:12	00:30:12	00:30:12		00:30:12	00:30:12	00:30:12	00:30:12		2 days, 21:15:12	00:30:12	00:30:12	t at Max V [600]
		12:06:46	12:05:07	?????	?????		?????	?????	?????	?????		2 days, 20:02:21	?????	?????	Lagtime [600]
	G	3.8	-13.287	-0.027	-0.016		-0.007	0.005	-0.019	-0.007		-0.006	-0.007	-0.009	Max V [600]
		0.937	0.644	0.852	0.709		0.658	0.696	0.76	0.581		0.75	0.5	0.636	R-Squared [600]
		14:15:12	00:30:12	23:30:12	00:30:12		00:30:12	2 days, 7:30:12	00:30:12	00:30:12		00:30:12	00:30:12	00:30:12	t at Max V [600]
		09:18:29	?????	22:00:56	?????		?????	2 days, 8:52:42	?????	?????		?????	?????	?????	Lagtime [600]
	H	3.732	4.247	-0.013	-0.008		0.005	-0.007	-0.008	-0.007		0.005	-0.005	-0.01	Max V [600]
		1	0.936	0.885	0.692		0.942	0.55	0.5	0.581		0.8	0.457	0.662	R-Squared [600]
		07:45:12	12:45:12	00:30:12	00:30:12		22:45:12	00:30:12	00:30:12	00:30:12		1 day, 20:45:12	00:30:12	00:30:12	t at Max V [600]
		05:12:56	07:37:23	?????	?????		23:15:12	?????	?????	?????		1 day, 21:22:42	?????	?????	Lagtime [600]
[truncated: 32 more columns]
