# Supplementary material for: Bacterial–fungal interactions in the neonatal gut influence asthma outcomes later in life
Source: eLife. 2021 Apr 20;10:e67740. doi: 10.7554/eLife.67740 (PMC8075585; doi:10.7554/eLife.67740)
Supplement: Figure 4—source data 6. [file elife-67740-fig4-data6.xlsx]

## Sheet: Plate 1 - Sheet1
Software Version	3.05.11
Experiment File Path:	C:\Users\Plate Reader\Documents\Roz\Pichia_070919.xpt
Protocol File Path:	C:\Users\Plate Reader\Documents\Roz\Pichia_GC.prt
Plate Number	Plate 1
Date	2019-07-09
Time	16:56:20
Reader Type:	Synergy H1
Reader Serial Number:	1905217
Reading Type	Reader
Procedure Details
Plate Type	96 WELL PLATE (Use plate lid)
Eject plate on completion
Set Temperature	Setpoint 37°C
	Preheat before moving to next step
Start Kinetic	Runtime 72:00:00 (HH:MM:SS), Interval 0:15:00, 289 Reads
Shake	Orbital: 0:10 (MM:SS)
	Frequency: 282 cpm (3 mm)
Read	Absorbance Endpoint
	Full Plate
	Wavelengths: 600
	Read Speed: Normal, Delay: 100 msec, Measurements/Data Point: 8
End Kinetic
600
	Time	T° 600	A1	A2	A3	A4	A5	A6	A7	A8	A9	A10	A11	A12	B1	B2	B3	B4	B5	B6	B7	B8	B9	B10	B11	B12	C1	C2	C3	C4	C5	C6	C7	C8	C9	C10	C11	C12	D1	D2	D3	D4	D5	D6	D7	D8	D9	D10	D11
	00:00:12	37	0.127	0.126	0.126	0.089	0.126	0.128	0.129	0.09	0.124	0.124	0.123	0.088	0.134	0.158	0.135	0.091	0.125	0.13	0.132	0.091	0.125	0.123	1.173	0.088	0.146	0.155	0.218	1.454	0.15	0.141	1.046	0.102	0.564	0.14	0.129	0.162	0.128	0.131	0.132	0.09	0.139	0.127	0.131	0.09	0.128	0.125	0.128
	00:15:12	37	0.134	0.126	0.13	0.088	0.13	0.132	0.131	0.09	0.129	0.128	0.127	0.087	0.138	0.176	0.14	0.09	0.133	0.138	0.14	0.091	0.131	0.128	1.338	0.088	0.138	0.141	0.263	1.536	0.167	0.144	1.033	0.116	0.619	0.154	0.137	0.199	0.124	0.132	0.135	0.09	0.146	0.124	0.124	0.09	0.123	0.124	0.125
	00:30:12	37	0.134	0.127	0.126	0.088	0.127	0.132	0.13	0.09	0.126	0.127	0.127	0.087	0.143	0.187	0.141	0.09	0.134	0.139	0.141	0.09	0.133	0.13	1.325	0.088	0.144	0.145	0.288	1.58	0.173	0.146	0.158	0.123	0.645	0.138	0.139	0.219	0.131	0.131	0.131	0.09	0.153	0.132	0.131	0.09	0.131	0.13	0.13
	00:45:12	36.9	0.132	0.129	0.127	0.088	0.127	0.132	0.131	0.09	0.128	0.128	0.127	0.087	0.143	0.191	0.142	0.09	0.136	0.14	0.143	0.09	0.133	0.13	1.289	0.088	0.143	0.149	0.298	1.535	0.179	0.148	0.163	0.126	0.662	0.141	0.145	0.09	0.139	0.13	0.13	0.09	0.165	0.136	0.133	0.089	0.132	0.134	0.13
	01:00:12	37	0.135	0.131	0.129	0.088	0.128	0.132	0.132	0.09	0.129	0.128	0.128	0.087	0.139	0.194	0.144	0.09	0.137	0.141	0.144	0.091	0.134	0.131	1.257	0.088	0.143	0.151	0.293	1.532	0.203	0.149	0.165	0.128	0.669	0.149	0.148	0.091	0.131	0.128	0.129	0.09	0.162	0.131	0.131	0.089	0.129	0.13	0.132
	01:15:12	37	0.135	0.132	0.131	0.088	0.129	0.133	0.133	0.09	0.13	0.129	0.128	0.087	0.139	0.191	0.145	0.09	0.138	0.142	0.145	0.091	0.136	0.133	1.244	0.088	0.142	0.151	0.289	1.553	0.203	0.15	0.167	0.127	0.228	0.151	0.148	0.091	0.13	0.128	0.129	0.09	0.161	0.129	0.128	0.09	0.126	0.128	0.13
	01:30:12	37	0.136	0.133	0.131	0.088	0.129	0.134	0.134	0.089	0.13	0.13	0.129	0.087	0.144	0.189	0.145	0.09	0.138	0.142	0.145	0.091	0.136	0.134	1.239	0.088	0.142	0.15	0.284	1.72	0.202	0.151	0.166	0.127	0.227	0.149	0.15	0.09	0.131	0.129	0.13	0.09	0.16	0.129	0.127	0.089	0.128	0.128	0.129
	01:45:12	37	0.138	0.134	0.133	0.088	0.13	0.136	0.136	0.089	0.131	0.13	0.13	0.087	0.142	0.189	0.145	0.09	0.139	0.143	0.146	0.09	0.136	0.133	1.237	0.088	0.143	0.151	0.279	1.514	0.202	0.151	0.167	0.126	0.224	0.148	0.147	0.091	0.132	0.13	0.131	0.09	0.16	0.13	0.129	0.089	0.129	0.13	0.131
	02:00:12	37	0.139	0.135	0.134	0.088	0.132	0.137	0.137	0.089	0.131	0.131	0.131	0.087	0.144	0.187	0.146	0.09	0.14	0.145	0.147	0.09	0.136	0.133	1.237	0.088	0.145	0.152	0.275	1.186	0.201	0.153	0.168	0.125	0.221	0.149	0.15	0.09	0.133	0.132	0.132	0.09	0.162	0.131	0.13	0.089	0.13	0.131	0.133
	02:15:12	37	0.141	0.135	0.135	0.088	0.134	0.139	0.139	0.09	0.132	0.131	0.132	0.087	0.146	0.187	0.148	0.091	0.142	0.147	0.149	0.09	0.137	0.134	1.23	0.088	0.146	0.154	0.273	1.54	0.2	0.155	0.17	0.123	0.221	0.15	0.149	0.09	0.135	0.134	0.134	0.09	0.163	0.132	0.131	0.089	0.132	0.133	0.134
	02:30:12	37	0.144	0.138	0.138	0.088	0.136	0.142	0.141	0.09	0.132	0.131	0.132	0.087	0.15	0.187	0.151	0.09	0.145	0.15	0.152	0.09	0.138	0.135	1.217	0.088	0.149	0.157	0.272	1.684	0.201	0.158	0.173	0.122	0.221	0.152	0.153	0.091	0.138	0.136	0.136	0.09	0.166	0.135	0.133	0.089	0.135	0.136	0.137
	02:45:12	37	0.147	0.141	0.141	0.088	0.139	0.145	0.144	0.089	0.132	0.132	0.133	0.087	0.153	0.19	0.154	0.09	0.149	0.154	0.156	0.09	0.139	0.136	1.205	0.088	0.153	0.161	0.273	1.673	0.205	0.154	0.177	0.121	0.221	0.154	0.155	0.091	0.141	0.139	0.139	0.09	0.17	0.138	0.137	0.089	0.138	0.139	0.14
	03:00:12	37	0.152	0.145	0.145	0.088	0.143	0.149	0.148	0.09	0.133	0.132	0.133	0.087	0.158	0.193	0.159	0.09	0.154	0.16	0.161	0.09	0.14	0.138	1.185	0.088	0.158	0.166	0.273	1.098	0.207	0.16	0.183	0.118	0.222	0.158	0.157	0.091	0.145	0.143	0.143	0.09	0.175	0.142	0.141	0.089	0.142	0.143	0.144
	03:15:12	37	0.158	0.15	0.15	0.088	0.148	0.154	0.154	0.089	0.134	0.133	0.134	0.087	0.165	0.199	0.166	0.09	0.16	0.166	0.167	0.09	0.143	0.14	1.165	0.088	0.164	0.172	0.276	1.499	0.213	0.167	0.191	0.117	0.225	0.161	0.164	0.091	0.151	0.148	0.148	0.09	0.182	0.148	0.145	0.089	0.147	0.148	0.15
	03:30:12	37	0.166	0.157	0.157	0.088	0.154	0.161	0.16	0.089	0.134	0.134	0.135	0.087	0.173	0.173	0.173	0.09	0.167	0.175	0.175	0.09	0.146	0.143	1.143	0.088	0.172	0.181	0.279	1.522	0.223	0.176	0.202	0.116	0.23	0.167	0.171	0.091	0.157	0.153	0.154	0.09	0.19	0.155	0.151	0.089	0.153	0.155	0.157
	03:45:12	37	0.175	0.165	0.165	0.088	0.162	0.17	0.169	0.089	0.136	0.136	0.137	0.087	0.182	0.184	0.184	0.09	0.177	0.185	0.186	0.09	0.15	0.147	1.118	0.088	0.181	0.191	0.287	1.497	0.232	0.187	0.215	0.115	0.236	0.175	0.178	0.091	0.165	0.161	0.162	0.09	0.2	0.163	0.159	0.089	0.161	0.164	0.165
	04:00:12	37	0.186	0.175	0.175	0.088	0.171	0.18	0.178	0.089	0.137	0.138	0.139	0.087	0.195	0.196	0.196	0.09	0.189	0.198	0.197	0.09	0.154	0.151	1.099	0.088	0.193	0.204	0.294	1.688	0.245	0.2	0.231	0.113	0.245	0.183	0.186	0.091	0.175	0.17	0.171	0.09	0.212	0.173	0.168	0.089	0.17	0.174	0.175
	04:15:12	37	0.2	0.187	0.188	0.088	0.182	0.192	0.19	0.09	0.14	0.14	0.141	0.088	0.205	0.212	0.211	0.09	0.203	0.213	0.212	0.09	0.16	0.157	1.07	0.088	0.207	0.219	0.308	1.218	0.258	0.216	0.249	0.112	0.255	0.193	0.195	0.091	0.187	0.181	0.182	0.09	0.226	0.185	0.179	0.089	0.182	0.186	0.188
	04:30:12	37	0.215	0.201	0.202	0.088	0.196	0.206	0.204	0.089	0.142	0.143	0.143	0.087	0.222	0.229	0.227	0.09	0.218	0.23	0.23	0.09	0.167	0.164	1.091	0.088	0.224	0.237	0.319	1.379	0.276	0.234	0.269	0.11	0.268	0.205	0.205	0.091	0.201	0.194	0.195	0.09	0.242	0.199	0.192	0.089	0.196	0.201	0.203
	04:45:12	37	0.235	0.218	0.22	0.088	0.211	0.222	0.22	0.089	0.144	0.146	0.147	0.087	0.242	0.249	0.246	0.09	0.237	0.25	0.249	0.09	0.175	0.171	1.068	0.088	0.243	0.257	0.338	1.772	0.297	0.257	0.294	0.11	0.281	0.218	0.218	0.091	0.219	0.209	0.21	0.09	0.262	0.216	0.208	0.089	0.211	0.217	0.22
	05:00:12	37	0.258	0.239	0.239	0.088	0.228	0.241	0.239	0.09	0.148	0.15	0.151	0.087	0.265	0.272	0.268	0.09	0.258	0.274	0.272	0.09	0.184	0.18	1.047	0.088	0.265	0.281	0.358	1.415	0.322	0.281	0.321	0.109	0.299	0.234	0.233	0.091	0.238	0.227	0.229	0.09	0.285	0.235	0.226	0.089	0.23	0.236	0.24
	05:15:12	37	0.285	0.262	0.262	0.088	0.249	0.263	0.26	0.089	0.152	0.154	0.155	0.087	0.291	0.298	0.292	0.09	0.284	0.3	0.297	0.09	0.193	0.19	1.025	0.087	0.291	0.308	0.383	1.672	0.35	0.31	0.353	0.092	0.317	0.252	0.251	0.091	0.261	0.247	0.25	0.089	0.311	0.258	0.248	0.089	0.252	0.258	0.262
	05:30:12	37.1	0.316	0.289	0.289	0.088	0.273	0.288	0.285	0.089	0.156	0.159	0.16	0.087	0.323	0.329	0.321	0.09	0.314	0.332	0.328	0.09	0.205	0.201	1.005	0.088	0.322	0.34	0.409	1.778	0.385	0.343	0.391	0.091	0.34	0.271	0.27	0.091	0.288	0.27	0.274	0.09	0.341	0.283	0.273	0.089	0.278	0.283	0.289
	05:45:12	37	0.352	0.32	0.319	0.088	0.301	0.318	0.315	0.09	0.161	0.165	0.166	0.088	0.358	0.364	0.354	0.091	0.349	0.368	0.362	0.091	0.218	0.212	0.986	0.088	0.356	0.376	0.442	1.237	0.425	0.381	0.432	0.091	0.362	0.293	0.292	0.091	0.318	0.298	0.301	0.09	0.374	0.312	0.301	0.09	0.307	0.313	0.321
	06:00:12	37	0.391	0.355	0.354	0.088	0.332	0.351	0.349	0.09	0.166	0.171	0.172	0.087	0.397	0.403	0.389	0.09	0.386	0.407	0.4	0.09	0.232	0.226	0.97	0.088	0.395	0.415	0.479	1.674	0.468	0.425	0.477	0.091	0.39	0.317	0.317	0.091	0.353	0.329	0.333	0.09	0.412	0.345	0.334	0.089	0.341	0.346	0.358
	06:15:12	37	0.438	0.393	0.393	0.088	0.369	0.388	0.387	0.089	0.172	0.178	0.179	0.087	0.44	0.446	0.429	0.09	0.428	0.451	0.445	0.09	0.247	0.241	0.956	0.088	0.437	0.459	0.521	1.305	0.515	0.472	0.525	0.091	0.419	0.345	0.343	0.091	0.392	0.364	0.368	0.09	0.452	0.382	0.37	0.09	0.378	0.384	0.396
	06:30:12	37	0.487	0.436	0.436	0.088	0.409	0.429	0.428	0.089	0.179	0.185	0.187	0.087	0.487	0.493	0.472	0.09	0.473	0.497	0.49	0.09	0.263	0.256	0.944	0.088	0.482	0.506	0.566	1.394	0.567	0.523	0.578	0.091	0.451	0.374	0.372	0.091	0.435	0.403	0.405	0.09	0.494	0.422	0.41	0.089	0.417	0.426	0.438
	06:45:12	37	0.539	0.483	0.482	0.088	0.454	0.473	0.472	0.089	0.186	0.194	0.195	0.087	0.537	0.544	0.518	0.09	0.523	0.548	0.54	0.09	0.281	0.274	0.937	0.088	0.533	0.556	0.614	1.647	0.619	0.576	0.632	0.091	0.485	0.406	0.404	0.091	0.483	0.445	0.447	0.09	0.541	0.465	0.453	0.089	0.462	0.469	0.486
	07:00:12	37	0.595	0.533	0.532	0.088	0.499	0.522	0.52	0.089	0.195	0.203	0.205	0.087	0.589	0.597	0.565	0.09	0.572	0.602	0.592	0.09	0.301	0.293	0.93	0.088	0.587	0.607	0.662	1.284	0.675	0.632	0.687	0.091	0.521	0.441	0.437	0.091	0.532	0.49	0.49	0.09	0.588	0.511	0.5	0.089	0.509	0.515	0.535
	07:15:12	37	0.652	0.587	0.581	0.088	0.547	0.57	0.572	0.09	0.204	0.212	0.214	0.088	0.642	0.652	0.615	0.09	0.625	0.655	0.642	0.09	0.322	0.313	0.929	0.088	0.645	0.661	0.715	1.666	0.732	0.69	0.744	0.091	0.561	0.476	0.473	0.091	0.586	0.542	0.538	0.09	0.638	0.562	0.551	0.089	0.558	0.566	0.589
	07:30:12	37	0.708	0.641	0.632	0.088	0.597	0.619	0.621	0.089	0.212	0.223	0.225	0.087	0.699	0.708	0.666	0.09	0.676	0.708	0.69	0.09	0.344	0.335	0.93	0.088	0.702	0.718	0.768	1.28	0.787	0.744	0.799	0.091	0.599	0.513	0.51	0.09	0.642	0.592	0.589	0.09	0.689	0.613	0.603	0.089	0.609	0.618	0.645
	07:45:12	37	0.761	0.693	0.685	0.088	0.646	0.668	0.67	0.089	0.224	0.234	0.236	0.087	0.753	0.764	0.716	0.09	0.727	0.756	0.734	0.09	0.369	0.358	0.936	0.088	0.76	0.775	0.82	1.667	0.838	0.795	0.85	0.091	0.639	0.554	0.55	0.09	0.701	0.645	0.64	0.09	0.739	0.665	0.656	0.089	0.661	0.673	0.702
	08:00:12	37	0.815	0.745	0.737	0.088	0.694	0.712	0.716	0.089	0.234	0.247	0.247	0.087	0.807	0.819	0.765	0.09	0.774	0.8	0.786	0.09	0.394	0.382	0.943	0.088	0.818	0.829	0.873	1.28	0.883	0.841	0.899	0.091	0.679	0.595	0.59	0.09	0.758	0.7	0.693	0.09	0.791	0.718	0.707	0.089	0.714	0.729	0.759
	08:15:12	37.1	0.859	0.793	0.785	0.088	0.738	0.752	0.759	0.09	0.246	0.26	0.26	0.087	0.856	0.871	0.814	0.09	0.823	0.842	0.834	0.09	0.422	0.408	0.953	0.088	0.872	0.882	0.924	1.663	0.927	0.881	0.945	0.091	0.72	0.635	0.629	0.09	0.815	0.753	0.747	0.09	0.836	0.769	0.76	0.089	0.768	0.782	0.813
	08:30:12	37	0.903	0.84	0.835	0.088	0.779	0.79	0.8	0.09	0.259	0.273	0.275	0.087	0.906	0.92	0.859	0.09	0.868	0.884	0.883	0.09	0.447	0.434	0.967	0.088	0.924	0.931	0.973	1.293	0.965	0.923	0.985	0.091	0.761	0.673	0.669	0.09	0.865	0.806	0.797	0.09	0.879	0.82	0.81	0.089	0.818	0.832	0.865
	08:45:12	37.1	0.946	0.888	0.884	0.088	0.818	0.824	0.841	0.09	0.272	0.287	0.289	0.088	0.951	0.968	0.901	0.09	0.908	0.923	0.931	0.09	0.475	0.462	0.982	0.088	0.973	0.978	1.019	1.657	1.006	0.962	1.026	0.091	0.8	0.711	0.708	0.091	0.916	0.857	0.847	0.09	0.922	0.87	0.855	0.089	0.867	0.882	0.915
	09:00:12	37	0.989	0.94	0.931	0.088	0.855	0.856	0.878	0.089	0.286	0.303	0.303	0.087	0.992	1.011	0.94	0.09	0.946	0.957	0.973	0.09	0.503	0.489	0.997	0.088	1.017	1.02	1.063	1.312	1.042	0.999	1.059	0.091	0.835	0.747	0.744	0.09	0.963	0.904	0.892	0.09	0.964	0.918	0.902	0.089	0.911	0.929	0.964
	09:15:12	37	1.029	0.986	0.973	0.088	0.891	0.888	0.916	0.089	0.3	0.318	0.318	0.087	1.03	1.056	0.979	0.09	0.983	0.99	1.014	0.09	0.53	0.515	1.016	0.087	1.058	1.06	1.098	1.654	1.078	1.034	1.094	0.09	0.873	0.781	0.781	0.09	1.009	0.948	0.937	0.089	1.003	0.963	0.945	0.089	0.958	0.977	1.005
	09:30:12	37	1.068	1.028	1.014	0.088	0.925	0.919	0.951	0.089	0.316	0.334	0.334	0.087	1.067	1.097	1.017	0.09	1.016	1.022	1.049	0.09	0.557	0.542	0.687	0.088	1.099	1.099	1.14	1.324	1.112	1.067	1.125	0.091	0.906	0.814	0.813	0.09	1.049	0.992	0.978	0.089	1.039	1.007	0.985	0.089	0.997	1.017	1.047
	09:45:12	37	1.104	1.071	1.051	0.088	0.958	0.947	0.984	0.089	0.332	0.351	0.349	0.087	1.102	1.137	1.054	0.09	1.048	1.052	1.083	0.09	0.585	0.568	0.723	0.088	1.135	1.135	1.173	1.652	1.147	1.096	1.153	0.091	0.938	0.845	0.843	0.09	1.088	1.032	1.016	0.09	1.072	1.044	1.026	0.089	1.041	1.057	1.086
	10:00:12	37	1.137	1.113	1.087	0.088	0.988	0.972	1.014	0.089	0.347	0.368	0.366	0.088	1.134	1.174	1.087	0.09	1.078	1.078	1.113	0.09	0.611	0.593	0.751	0.088	1.17	1.172	1.205	1.321	1.177	1.126	1.185	0.091	0.969	0.871	0.861	0.09	1.125	1.071	1.052	0.09	1.103	1.082	1.062	0.089	1.073	1.095	1.123
	10:15:12	37	1.171	1.147	1.121	0.088	1.017	0.997	1.043	0.089	0.364	0.385	0.382	0.087	1.165	1.209	1.119	0.09	1.105	1.102	1.142	0.09	0.635	0.615	0.779	0.087	1.202	1.207	1.238	1.393	1.214	1.155	1.204	0.091	1.003	0.897	0.886	0.09	1.157	1.108	1.088	0.09	1.134	1.117	1.096	0.089	1.109	1.132	1.157
	10:30:12	37	1.2	1.182	1.153	0.088	1.044	1.021	1.068	0.09	0.38	0.402	0.4	0.088	1.196	1.243	1.149	0.09	1.128	1.123	1.168	0.09	0.657	0.638	0.803	0.088	1.232	1.238	1.271	1.352	1.244	1.178	1.228	0.091	1.031	0.921	0.908	0.09	1.188	1.141	1.122	0.09	1.162	1.148	1.127	0.089	1.141	1.162	1.189
	10:45:12	37	1.23	1.215	1.184	0.088	1.068	1.042	1.091	0.089	0.397	0.42	0.417	0.087	1.223	1.274	1.178	0.09	1.152	1.143	1.191	0.09	0.68	0.658	0.826	0.087	1.26	1.266	1.304	1.647	1.272	1.202	1.251	0.091	1.049	0.942	0.926	0.09	1.215	1.173	1.152	0.09	1.189	1.181	1.157	0.089	1.174	1.197	1.219
	11:00:12	37	1.258	1.247	1.211	0.088	1.088	1.057	1.111	0.09	0.413	0.437	0.432	0.087	1.249	1.304	1.204	0.09	1.172	1.161	1.214	0.09	0.699	0.677	0.846	0.087	1.287	1.294	1.333	1.35	1.305	1.222	1.271	0.09	1.062	0.958	0.941	0.09	1.242	1.203	1.182	0.09	1.213	1.21	1.185	0.089	1.204	1.226	1.248
	11:15:12	37	1.285	1.276	1.239	0.088	1.1	1.068	1.125	0.09	0.429	0.453	0.448	0.087	1.273	1.331	1.227	0.09	1.188	1.176	1.233	0.09	0.719	0.697	0.863	0.087	1.312	1.318	1.361	1.816	1.299	1.241	1.289	0.091	1.071	0.969	0.949	0.09	1.267	1.232	1.208	0.089	1.237	1.238	1.212	0.089	1.228	1.252	1.277
	11:30:12	37	1.308	1.305	1.266	0.088	1.106	1.087	1.13	0.09	0.445	0.469	0.466	0.087	1.296	1.357	1.251	0.09	1.202	1.187	1.246	0.09	0.735	0.713	0.872	0.087	1.334	1.343	1.39	1.865	1.296	1.255	1.3	0.09	1.08	0.974	0.954	0.09	1.292	1.258	1.235	0.09	1.261	1.263	1.238	0.089	1.256	1.279	1.302
	11:45:12	37	1.331	1.33	1.292	0.088	1.107	1.134	1.131	0.09	0.461	0.485	0.48	0.088	1.317	1.381	1.273	0.09	1.208	1.194	1.255	0.09	0.751	0.728	0.879	0.087	1.356	1.364	1.413	1.886	1.267	1.263	1.306	0.09	1.089	0.979	0.957	0.09	1.312	1.283	1.259	0.09	1.279	1.287	1.26	0.089	1.279	1.301	1.326
	12:00:12	37	1.352	1.353	1.315	0.088	1.104	1.204	1.131	0.09	0.477	0.5	0.495	0.087	1.336	1.402	1.294	0.09	1.21	1.194	1.26	0.09	0.763	0.738	0.886	0.087	1.374	1.385	1.43	1.897	1.273	1.267	1.31	0.091	1.1	0.981	0.959	0.09	1.33	1.306	1.28	0.09	1.299	1.31	1.28	0.089	1.303	1.321	1.346
	12:15:12	37	1.367	1.372	1.335	0.088	1.104	1.236	1.129	0.089	0.49	0.516	0.509	0.087	1.352	1.422	1.314	0.09	1.209	1.194	1.264	0.09	0.773	0.748	0.888	0.087	1.386	1.403	1.447	1.909	1.275	1.269	1.325	0.09	1.109	0.976	0.961	0.09	1.343	1.327	1.301	0.089	1.315	1.33	1.3	0.089	1.323	1.342	1.361
	12:30:12	37	1.381	1.389	1.352	0.088	1.103	1.217	1.128	0.089	0.506	0.529	0.523	0.087	1.363	1.441	1.333	0.09	1.21	1.194	1.267	0.09	0.778	0.753	0.893	0.087	1.397	1.418	1.456	1.931	1.28	1.271	1.328	0.09	1.127	0.989	0.963	0.09	1.352	1.347	1.317	0.089	1.327	1.347	1.312	0.089	1.336	1.352	1.372
	12:45:12	37	1.394	1.403	1.367	0.088	1.102	1.207	1.127	0.089	0.519	0.543	0.536	0.087	1.373	1.455	1.349	0.09	1.21	1.194	1.271	0.09	0.782	0.756	0.894	0.087	1.407	1.431	1.46	1.948	1.31	1.272	1.334	0.09	1.168	1.105	0.964	0.09	1.36	1.356	1.331	0.089	1.337	1.361	1.322	0.089	1.344	1.365	1.38
	13:00:12	37	1.405	1.416	1.38	0.088	1.104	1.206	1.129	0.089	0.533	0.553	0.55	0.087	1.382	1.466	1.362	0.09	1.214	1.194	1.274	0.09	0.785	0.76	0.898	0.087	1.415	1.44	1.461	1.955	1.315	1.276	1.337	0.091	1.269	1.145	0.965	0.09	1.367	1.355	1.341	0.09	1.343	1.37	1.33	0.089	1.345	1.377	1.385
	13:15:12	37	1.413	1.428	1.393	0.088	1.107	1.217	1.133	0.09	0.545	0.565	0.561	0.087	1.391	1.476	1.373	0.09	1.216	1.198	1.278	0.09	0.788	0.761	0.9	0.087	1.424	1.445	1.459	1.962	1.337	1.279	1.34	0.09	1.319	1.153	0.967	0.09	1.372	1.355	1.349	0.089	1.349	1.38	1.335	0.089	1.341	1.386	1.382
	13:30:12	37	1.419	1.437	1.403	0.088	1.113	1.237	1.138	0.09	0.555	0.576	0.573	0.087	1.399	1.486	1.384	0.09	1.221	1.202	1.282	0.09	0.79	0.764	0.903	0.087	1.429	1.44	1.461	1.969	1.365	1.282	1.343	0.09	1.332	1.183	0.971	0.09	1.369	1.435	1.356	0.09	1.353	1.385	1.339	0.089	1.407	1.393	1.367
	13:45:12	37	1.422	1.445	1.41	0.088	1.117	1.268	1.144	0.09	0.566	0.584	0.581	0.087	1.404	1.494	1.394	0.09	1.225	1.208	1.287	0.09	0.793	0.766	0.905	0.087	1.433	1.465	1.47	1.977	1.38	1.284	1.347	0.09	1.335	1.202	0.976	0.09	1.354	1.515	1.365	0.09	1.351	1.38	1.331	0.089	1.517	1.398	1.414
	14:00:12	37	1.425	1.451	1.417	0.088	1.123	1.304	1.147	0.09	0.576	0.592	0.589	0.087	1.408	1.501	1.403	0.09	1.23	1.212	1.292	0.09	0.796	0.768	0.908	0.087	1.435	1.538	1.477	1.577	1.389	1.288	1.35	0.09	1.339	1.23	0.979	0.09	1.387	1.507	1.371	0.09	1.346	1.378	1.368	0.089	1.519	1.39	1.506
	14:15:12	37	1.427	1.453	1.421	0.088	1.128	1.343	1.147	0.09	0.583	0.598	0.593	0.087	1.41	1.507	1.412	0.09	1.234	1.217	1.296	0.09	0.799	0.77	0.912	0.087	1.436	1.54	1.484	1.513	1.398	1.294	1.351	0.09	1.342	1.26	0.985	0.09	1.467	1.518	1.376	0.089	1.36	1.437	1.457	0.089	1.513	1.387	1.533
	14:30:12	37	1.427	1.448	1.425	0.088	1.132	1.385	1.14	0.09	0.59	0.601	0.599	0.088	1.412	1.511	1.419	0.09	1.237	1.221	1.301	0.09	0.8	0.773	0.914	0.087	1.435	1.542	1.495	1.423	1.406	1.301	1.35	0.09	1.351	1.297	0.989	0.09	1.506	1.536	1.382	0.09	1.401	1.523	1.502	0.089	1.519	1.441	1.534
	14:45:12	37	1.428	1.442	1.427	0.088	1.136	1.426	1.152	0.09	0.595	0.604	0.603	0.087	1.413	1.514	1.426	0.09	1.24	1.224	1.305	0.09	0.803	0.777	0.917	0.087	1.433	1.556	1.5	1.448	1.408	1.306	1.347	0.09	1.357	1.332	0.993	0.09	1.5	1.561	1.384	0.09	1.461	1.531	1.488	0.089	1.527	1.542	1.547
	15:00:12	37	1.428	1.48	1.429	0.088	1.139	1.463	1.218	0.089	0.599	0.607	0.607	0.087	1.413	1.515	1.431	0.09	1.242	1.226	1.309	0.09	0.805	0.78	0.918	0.087	1.428	1.568	1.504	1.421	1.427	1.3	1.346	0.09	1.373	1.371	0.998	0.09	1.504	1.591	1.377	0.089	1.51	1.521	1.492	0.089	1.54	1.563	1.566
	15:15:12	37.1	1.428	1.541	1.428	0.088	1.142	1.496	1.315	0.09	0.603	0.612	0.61	0.088	1.413	1.517	1.436	0.09	1.243	1.228	1.312	0.09	0.81	0.782	0.918	0.087	1.422	1.579	1.513	1.428	1.443	1.296	1.351	0.09	1.4	1.414	1	0.09	1.513	1.626	1.361	0.09	1.509	1.526	1.505	0.089	1.561	1.539	1.589
	15:30:12	37	1.427	1.558	1.426	0.088	1.144	1.527	1.336	0.09	0.605	0.614	0.614	0.087	1.413	1.519	1.439	0.09	1.244	1.23	1.315	0.09	0.813	0.786	0.914	0.087	1.417	1.591	1.517	1.462	1.447	1.302	1.357	0.09	1.432	1.452	1.003	0.09	1.528	1.663	1.42	0.089	1.497	1.535	1.527	0.089	1.589	1.54	1.615
	15:45:12	37	1.426	1.539	1.419	0.088	1.146	1.553	1.337	0.09	0.609	0.616	0.617	0.088	1.413	1.519	1.441	0.09	1.244	1.233	1.318	0.09	0.815	0.789	0.905	0.087	1.419	1.603	1.513	1.446	1.463	1.325	1.369	0.09	1.475	1.489	1.006	0.09	1.55	1.701	1.513	0.09	1.498	1.549	1.553	0.089	1.619	1.548	1.643
	16:00:12	37	1.425	1.537	1.412	0.088	1.147	1.573	1.356	0.09	0.61	0.619	0.619	0.088	1.413	1.52	1.444	0.09	1.24	1.234	1.32	0.09	0.818	0.791	0.897	0.087	1.43	1.613	1.509	1.439	1.47	1.361	1.383	0.09	1.514	1.528	1.006	0.09	1.576	1.738	1.513	0.09	1.507	1.569	1.582	0.089	1.649	1.559	1.669
	16:15:12	37	1.424	1.543	1.431	0.088	1.149	1.585	1.388	0.089	0.609	0.621	0.623	0.087	1.412	1.52	1.447	0.09	1.229	1.236	1.322	0.09	0.821	0.792	0.961	0.087	1.45	1.626	1.508	1.422	1.476	1.371	1.398	0.09	1.556	1.574	1.009	0.09	1.604	1.772	1.504	0.089	1.519	1.595	1.611	0.089	1.678	1.575	1.692
	16:30:12	37	1.422	1.552	1.48	0.088	1.149	1.586	1.426	0.09	0.612	0.623	0.625	0.087	1.412	1.52	1.45	0.09	1.214	1.237	1.325	0.09	0.824	0.786	1.057	0.087	1.481	1.639	1.506	1.426	1.482	1.374	1.418	0.09	1.595	1.626	1.011	0.09	1.629	1.802	1.509	0.09	1.539	1.623	1.636	0.089	1.704	1.598	1.714
	16:45:12	37	1.42	1.565	1.523	0.088	1.15	1.579	1.469	0.09	0.666	0.621	0.628	0.088	1.411	1.52	1.449	0.09	1.21	1.237	1.327	0.09	0.822	0.806	1.145	0.087	1.518	1.652	1.504	1.444	1.486	1.383	1.439	0.09	1.626	1.677	1.01	0.09	1.653	1.827	1.519	0.09	1.563	1.652	1.656	0.089	1.728	1.624	1.733
	17:00:12	37	1.416	1.583	1.528	0.088	1.151	1.565	1.505	0.09	0.781	0.619	0.631	0.088	1.411	1.519	1.442	0.09	1.231	1.238	1.329	0.09	0.817	0.872	1.203	0.087	1.525	1.666	1.502	1.427	1.492	1.398	1.461	0.09	1.653	1.724	1.012	0.09	1.671	1.849	1.538	0.09	1.589	1.685	1.673	0.089	1.747	1.651	1.747
	17:15:12	37	1.41	1.604	1.517	0.088	1.152	1.546	1.536	0.09	0.878	0.644	0.632	0.087	1.41	1.518	1.434	0.09	1.285	1.24	1.331	0.09	0.822	0.963	1.263	0.087	1.505	1.679	1.498	1.438	1.497	1.418	1.481	0.09	1.674	1.767	1.014	0.09	1.687	1.869	1.561	0.09	1.615	1.715	1.687	0.089	1.76	1.676	1.759
	17:30:12	37	1.398	1.624	1.522	0.088	1.153	1.525	1.559	0.089	0.881	0.733	0.634	0.087	1.409	1.518	1.449	0.09	1.363	1.239	1.332	0.09	0.873	1.008	1.327	0.087	1.497	1.693	1.5	1.445	1.502	1.442	1.496	0.09	1.69	1.8	1.015	0.09	1.7	1.887	1.586	0.089	1.638	1.745	1.699	0.089	1.771	1.698	1.769
	17:45:12	37	1.384	1.642	1.535	0.088	1.153	1.502	1.574	0.089	0.882	0.853	0.637	0.088	1.409	1.518	1.486	0.09	1.436	1.24	1.334	0.09	0.955	1.004	1.391	0.087	1.496	1.708	1.501	1.464	1.507	1.47	1.512	0.09	1.702	1.823	1.015	0.09	1.711	1.905	1.611	0.09	1.662	1.772	1.71	0.089	1.78	1.718	1.778
	18:00:12	37	1.384	1.657	1.552	0.088	1.154	1.484	1.579	0.09	0.891	0.914	0.64	0.088	1.409	1.517	1.525	0.09	1.495	1.237	1.336	0.09	1.025	1.015	1.456	0.087	1.501	1.72	1.501	1.465	1.512	1.5	1.526	0.09	1.719	1.841	1.017	0.09	1.72	1.922	1.635	0.09	1.684	1.798	1.718	0.089	1.787	1.734	1.784
	18:15:12	37	1.4	1.669	1.572	0.088	1.154	1.47	1.578	0.09	0.902	0.928	0.642	0.088	1.408	1.516	1.547	0.09	1.543	1.237	1.336	0.09	1.041	1.036	1.518	0.087	1.502	1.731	1.504	1.493	1.519	1.528	1.539	0.09	1.738	1.857	1.017	0.09	1.727	1.937	1.656	0.09	1.701	1.819	1.724	0.089	1.792	1.747	1.79
	18:30:12	37	1.421	1.68	1.595	0.088	1.155	1.456	1.573	0.09	0.916	0.95	0.646	0.087	1.407	1.515	1.56	0.09	1.577	1.231	1.337	0.09	1.046	1.06	1.575	0.087	1.504	1.741	1.506	1.494	1.523	1.558	1.55	0.09	1.761	1.869	1.018	0.09	1.732	1.951	1.678	0.09	1.718	1.838	1.73	0.089	1.798	1.759	1.795
	18:45:12	37	1.444	1.689	1.618	0.088	1.156	1.444	1.564	0.09	0.932	0.978	0.646	0.088	1.406	1.513	1.575	0.09	1.601	1.225	1.339	0.09	1.063	1.086	1.631	0.087	1.508	1.749	1.508	1.504	1.526	1.585	1.561	0.09	1.783	1.881	1.017	0.09	1.737	1.964	1.698	0.09	1.734	1.852	1.736	0.089	1.803	1.768	1.799
	19:00:12	37	1.468	1.696	1.64	0.088	1.157	1.429	1.553	0.09	0.954	1.014	0.647	0.087	1.403	1.511	1.595	0.09	1.622	1.228	1.339	0.09	1.085	1.117	1.683	0.087	1.514	1.756	1.51	1.52	1.528	1.611	1.572	0.09	1.804	1.889	1.015	0.09	1.74	1.975	1.718	0.09	1.749	1.866	1.741	0.089	1.808	1.776	1.804
	19:15:12	37	1.488	1.701	1.659	0.088	1.158	1.406	1.543	0.09	0.985	1.056	0.649	0.087	1.399	1.509	1.614	0.09	1.642	1.258	1.339	0.09	1.113	1.153	1.734	0.087	1.518	1.762	1.51	1.557	1.531	1.634	1.581	0.09	1.82	1.905	1.009	0.09	1.743	1.987	1.736	0.09	1.763	1.878	1.745	0.089	1.812	1.783	1.808
	19:30:12	37	1.505	1.706	1.677	0.088	1.158	1.396	1.533	0.09	1.024	1.103	0.65	0.087	1.391	1.505	1.633	0.09	1.659	1.31	1.34	0.09	1.146	1.197	1.781	0.087	1.523	1.767	1.51	1.551	1.533	1.656	1.59	0.09	1.832	1.911	1.002	0.09	1.745	1.996	1.755	0.09	1.777	1.889	1.749	0.089	1.815	1.789	1.811
	19:45:12	37	1.519	1.709	1.69	0.088	1.157	1.395	1.523	0.09	1.068	1.151	0.648	0.087	1.388	1.498	1.651	0.09	1.677	1.371	1.341	0.09	1.187	1.246	1.819	0.087	1.528	1.771	1.51	1.57	1.535	1.678	1.599	0.09	1.844	1.917	1.028	0.09	1.748	2.002	1.771	0.09	1.789	1.899	1.753	0.089	1.818	1.794	1.813
	20:00:12	37	1.532	1.711	1.702	0.088	1.158	1.396	1.509	0.09	1.114	1.2	0.665	0.087	1.4	1.5	1.668	0.09	1.692	1.401	1.341	0.09	1.235	1.303	1.852	0.087	1.534	1.775	1.51	1.588	1.537	1.696	1.607	0.09	1.857	1.923	1.109	0.09	1.75	2.008	1.786	0.09	1.8	1.908	1.755	0.089	1.821	1.8	1.815
	20:15:12	37	1.544	1.713	1.71	0.088	1.159	1.4	1.5	0.089	1.16	1.25	0.721	0.087	1.425	1.523	1.682	0.09	1.701	1.397	1.337	0.09	1.285	1.362	1.88	0.087	1.54	1.778	1.51	1.617	1.538	1.712	1.614	0.09	1.87	1.931	1.211	0.09	1.752	2.015	1.8	0.09	1.81	1.914	1.759	0.089	1.824	1.804	1.817
	20:30:12	37	1.552	1.715	1.718	0.088	1.159	1.403	1.487	0.09	1.208	1.303	0.81	0.087	1.457	1.564	1.697	0.09	1.708	1.398	1.329	0.09	1.338	1.427	1.901	0.087	1.546	1.782	1.51	1.643	1.539	1.723	1.622	0.09	1.878	1.94	1.225	0.089	1.755	2.02	1.812	0.09	1.819	1.922	1.762	0.089	1.826	1.808	1.818
	20:45:12	37	1.558	1.717	1.724	0.088	1.16	1.409	1.476	0.09	1.261	1.357	0.872	0.087	1.478	1.608	1.71	0.09	1.711	1.415	1.32	0.09	1.398	1.489	1.92	0.087	1.554	1.784	1.51	1.656	1.54	1.722	1.632	0.09	1.884	1.95	1.217	0.09	1.757	2.025	1.824	0.09	1.826	1.927	1.764	0.089	1.829	1.812	1.819
	21:00:12	37	1.562	1.719	1.73	0.088	1.161	1.418	1.466	0.09	1.315	1.408	0.877	0.088	1.471	1.622	1.722	0.09	1.711	1.436	1.321	0.09	1.458	1.548	1.936	0.087	1.561	1.787	1.511	1.674	1.54	1.717	1.634	0.09	1.889	1.951	1.226	0.09	1.759	2.026	1.834	0.09	1.833	1.933	1.767	0.09	1.832	1.815	1.82
	21:15:12	37	1.563	1.72	1.735	0.088	1.161	1.426	1.459	0.09	1.368	1.458	0.88	0.087	1.458	1.619	1.733	0.09	1.707	1.462	1.342	0.09	1.52	1.601	1.95	0.087	1.567	1.789	1.512	1.694	1.541	1.723	1.635	0.09	1.894	1.954	1.242	0.09	1.761	2.028	1.844	0.09	1.839	1.938	1.768	0.089	1.834	1.818	1.822
	00:00:00
	00:00:00
	00:00:00
	00:00:00
	00:00:00
	00:00:00
	00:00:00
	00:00:00
	00:00:00
	00:00:00
	00:00:00
	00:00:00
	00:00:00
	00:00:00
	00:00:00
	00:00:00
	00:00:00
	00:00:00
	00:00:00
	00:00:00
	00:00:00
	00:00:00
	00:00:00
	00:00:00
	00:00:00
	00:00:00
	00:00:00
	00:00:00
	00:00:00
	00:00:00
	00:00:00
	00:00:00
	00:00:00
	00:00:00
	00:00:00
	00:00:00
	00:00:00
	00:00:00
	00:00:00
	00:00:00
	00:00:00
	00:00:00
	00:00:00
	00:00:00
	00:00:00
	00:00:00
	00:00:00
	00:00:00
	00:00:00
	00:00:00
	00:00:00
	00:00:00
	00:00:00
	00:00:00
	00:00:00
	00:00:00
	00:00:00
	00:00:00
	00:00:00
	00:00:00
	00:00:00
	00:00:00
	00:00:00
	00:00:00
	00:00:00
	00:00:00
	00:00:00
	00:00:00
	00:00:00
	00:00:00
	00:00:00
	00:00:00
	00:00:00
	00:00:00
	00:00:00
	00:00:00
	00:00:00
	00:00:00
	00:00:00
	00:00:00
	00:00:00
	00:00:00
	00:00:00
	00:00:00
	00:00:00
	00:00:00
	00:00:00
	00:00:00
	00:00:00
	00:00:00
	00:00:00
	00:00:00
	00:00:00
	00:00:00
	00:00:00
	00:00:00
	00:00:00
	00:00:00
	00:00:00
	00:00:00
	00:00:00
	00:00:00
	00:00:00
	00:00:00
	00:00:00
	00:00:00
	00:00:00
	00:00:00
	00:00:00
	00:00:00
	00:00:00
	00:00:00
	00:00:00
	00:00:00
	00:00:00
	00:00:00
	00:00:00
	00:00:00
	00:00:00
	00:00:00
	00:00:00
	00:00:00
	00:00:00
	00:00:00
	00:00:00
	00:00:00
	00:00:00
	00:00:00
	00:00:00
	00:00:00
	00:00:00
	00:00:00
	00:00:00
	00:00:00
	00:00:00
	00:00:00
	00:00:00
	00:00:00
	00:00:00
	00:00:00
	00:00:00
	00:00:00
	00:00:00
	00:00:00
	00:00:00
	00:00:00
	00:00:00
	00:00:00
	00:00:00
	00:00:00
	00:00:00
	00:00:00
	00:00:00
	00:00:00
	00:00:00
	00:00:00
	00:00:00
	00:00:00
	00:00:00
	00:00:00
	00:00:00
	00:00:00
	00:00:00
	00:00:00
	00:00:00
	00:00:00
	00:00:00
	00:00:00
	00:00:00
	00:00:00
	00:00:00
	00:00:00
	00:00:00
	00:00:00
	00:00:00
	00:00:00
	00:00:00
	00:00:00
	00:00:00
	00:00:00
	00:00:00
	00:00:00
	00:00:00
	00:00:00
	00:00:00
	00:00:00
	00:00:00
	00:00:00
	00:00:00
	00:00:00
	00:00:00
	00:00:00
	00:00:00
	00:00:00
	00:00:00
	00:00:00
	00:00:00
	00:00:00
	00:00:00
	00:00:00
	00:00:00
	00:00:00
	00:00:00
Results
		1	2	3	4	5	6	7	8	9	10	11	12
	A	3.707	3.526	3.435	-0.013	3.258	3.249	3.697	-0.009	5	5.333	3.954	0.004	Max V [600]
		1	1	1	0.74	1	1	0.94	0.486	0.943	0.966	0.958	0.9	R-Squared [600]
		07:15:12	07:30:12	07:30:12	00:30:12	07:30:12	07:15:12	15:00:12	00:30:12	17:00:12	17:30:12	20:15:12	00:45:12	t at Max V [600]
		04:53:58	05:04:19	05:02:30	?????	05:05:42	04:59:07	10:01:39	?????	14:52:18	15:32:23	17:38:20	02:25:12	Lagtime [600]
	B	3.655	3.707	3.345	-0.006	4.517	3.528	3.345	-0.008	3.931	4.118	-5.521	-0.011	Max V [600]
		1	1	1	0.614	0.997	1	1	0.766	0.966	1	0.656	0.688	R-Squared [600]
		07:30:12	07:30:12	07:30:12	06:15:12	17:30:12	07:00:12	07:00:12	12:15:12	17:45:12	20:30:12	09:15:12	12:00:12	t at Max V [600]
		04:55:46	05:01:48	04:51:35	05:35:12	12:56:19	04:46:21	04:43:03	11:10:12	14:17:07	15:13:49	08:22:12	10:05:30	Lagtime [600]
	C	3.857	3.723	3.511	-10.371	3.689	3.71	-17.545	0.399	-8.795	3.389	4.189	-2.299	Max V [600]
		1	1	1	0.879	1	1	0.749	0.854	0.751	0.895	0.949	0.7	R-Squared [600]
		07:30:12	07:30:12	07:30:12	14:00:12	07:00:12	07:00:12	00:30:12	00:30:12	01:15:12	12:45:12	20:00:12	00:45:12	t at Max V [600]
		05:05:49	04:59:02	04:53:40	14:23:08	04:37:48	04:47:39	?????	?????	00:56:45	08:09:45	16:04:46	00:34:32	Lagtime [600]
	D	3.821	3.578	3.487	-0.007	3.377	3.469	3.473	-0.009	3.504	3.617	3.748	-0.006	Max V [600]
		1	1	1	0.393	1	1	1	0.671	1	1	1	0.368	R-Squared [600]
		07:45:12	08:00:12	08:00:12	00:30:12	07:30:12	07:45:12	07:45:12	00:30:12	07:45:12	07:45:12	07:45:12	00:30:12	t at Max V [600]
		05:15:17	05:21:26	05:19:10	?????	04:47:21	05:09:52	05:14:01	?????	05:12:49	05:13:30	05:12:07	?????	Lagtime [600]
	E	4.699	4.569	3.456	-0.011	-0.006	0.005	-0.006	0.005	0.008	-0.008	-0.007	0.005	Max V [600]
		0.983	0.989	0.989	0.557	0.233	0.721	0.471	0.941	0.973	0.35	0.414	0.696	R-Squared [600]
		18:30:12	20:00:12	18:45:12	00:30:12	00:30:12	17:45:12	00:30:12	00:45:12	02:30:12	00:30:12	00:30:12	02:30:12	t at Max V [600]
		15:22:34	16:56:34	14:57:45	?????	?????	17:28:03	?????	01:18:57	02:07:42	?????	?????	02:18:57	Lagtime [600]
	F	2.153	5.922	3.057	0.009	0.005	-0.005	-0.005	-0.006	-0.009	-0.007	0.006	-0.006	Max V [600]
		1	0.995	0.946	0.579	0.889	0.5	0.421	0.431	0.5	0.5	0.75	0.471	R-Squared [600]
		07:30:12	16:45:12	15:15:12	00:30:12	00:45:12	00:30:12	00:30:12	00:30:12	00:30:12	00:30:12	05:45:12	00:30:12	t at Max V [600]
		04:26:15	13:50:40	10:44:42	?????	00:33:57	?????	?????	?????	?????	?????	06:31:52	?????	Lagtime [600]
	G	2.853	3.449	-10.229	0.008	-0.005	-0.005	-0.006	0.014	-0.005	-0.006	-0.007	-0.007	Max V [600]
		1	0.999	0.725	0.837	0.696	0.5	0.471	0.829	0.235	0.368	0.368	0.368	R-Squared [600]
		07:30:12	13:45:12	03:00:12	00:45:12	12:15:12	00:30:12	00:30:12	02:15:12	00:30:12	00:30:12	00:30:12	00:30:12	t at Max V [600]
		04:08:39	06:56:21	03:36:12	01:17:42	10:48:57	?????	?????	01:42:21	?????	?????	?????	?????	Lagtime [600]
	H	3.827	3.51	3.512	-0.006	0.005	-0.005	0.005	-0.006	-0.004	-0.005	0.006	-0.005	Max V [600]
		1	1	0.873	0.302	0.49	0.721	0.817	0.281	0.75	0.235	0.88	0.727	R-Squared [600]
		07:00:12	07:00:12	12:15:12	00:30:12	10:00:12	09:15:12	19:00:12	00:30:12	12:00:12	00:30:12	00:45:12	11:00:12	t at Max V [600]
		04:42:44	04:31:50	06:25:28	?????	11:04:29	07:45:12	20:04:29	?????	10:50:12	?????	01:45:12	09:41:27	Lagtime [600]
[truncated: 49 more columns]

## Sheet: Analysis
	Time	A1	A2	A3	A4		A5	A6	A7	A8		A9	A10	A11	A12		B1	B2	B3	B4		B5	B6	B7	B8		B9	B10	B11	B12		C1	C2	C3	C4		C5	C6	C7	C8		C9	C10	C11	C12		D1	D2	D3
	00:00:12	0.127	0.126	0.126	0.089	0.0373333	0.126	0.128	0.129	0.09	0.0376667	0.124	0.124	0.123	0.088	0.0356667	0.134	0.158	0.135	0.091	0.0513333	0.125	0.13	0.132	0.091	0.038	0.125	0.123	1.173	0.088	0.036	0.146	0.155	0.218	1.454	0.083	0.15	0.141	1.046	0.102	0.354667	0.564	0.14	0.129	0.162	0.115667	0.128	0.131	0.132
	00:15:12	0.134	0.126	0.13	0.088	0.042	0.13	0.132	0.131	0.09	0.041	0.129	0.128	0.127	0.087	0.041	0.138	0.176	0.14	0.09	0.0613333	0.133	0.138	0.14	0.091	0.046	0.131	0.128	1.338	0.088	0.0415	0.138	0.141	0.263	1.536	0.0906667	0.167	0.144	1.033	0.116	0.357	0.619	0.154	0.137	0.199	0.104333	0.124	0.132	0.135
	00:30:12	0.134	0.127	0.126	0.088	0.041	0.127	0.132	0.13	0.09	0.0396667	0.126	0.127	0.127	0.087	0.0396667	0.143	0.187	0.141	0.09	0.067	0.134	0.139	0.141	0.09	0.048	0.133	0.13	1.325	0.088	0.0435	0.144	0.145	0.288	1.58	0.102333	0.173	0.146	0.158	0.123	0.068	0.645	0.138	0.139	0.219	0.0883333	0.131	0.131	0.131
	00:45:12	0.132	0.129	0.127	0.088	0.0413333	0.127	0.132	0.131	0.09	0.04	0.128	0.128	0.127	0.087	0.0406667	0.143	0.191	0.142	0.09	0.0686667	0.136	0.14	0.143	0.09	0.0496667	0.133	0.13	1.289	0.088	0.0435	0.143	0.149	0.298	1.535	0.106667	0.179	0.148	0.163	0.126	0.0723333	0.662	0.141	0.145	0.09	0.226	0.139	0.13	0.13
	01:00:12	0.135	0.131	0.129	0.088	0.0436667	0.128	0.132	0.132	0.09	0.0406667	0.129	0.128	0.128	0.087	0.0413333	0.139	0.194	0.144	0.09	0.069	0.137	0.141	0.144	0.091	0.0496667	0.134	0.131	1.257	0.088	0.0445	0.143	0.151	0.293	1.532	0.105667	0.203	0.149	0.165	0.128	0.0813333	0.669	0.149	0.148	0.091	0.231	0.131	0.128	0.129
	01:15:12	0.135	0.132	0.131	0.088	0.0446667	0.129	0.133	0.133	0.09	0.0416667	0.13	0.129	0.128	0.087	0.042	0.139	0.191	0.145	0.09	0.0683333	0.138	0.142	0.145	0.091	0.0506667	0.136	0.133	1.244	0.088	0.0465	0.142	0.151	0.289	1.553	0.104	0.203	0.15	0.167	0.127	0.0823333	0.228	0.151	0.148	0.091	0.0846667	0.13	0.128	0.129
	01:30:12	0.136	0.133	0.131	0.088	0.0453333	0.129	0.134	0.134	0.089	0.0433333	0.13	0.13	0.129	0.087	0.0426667	0.144	0.189	0.145	0.09	0.0693333	0.138	0.142	0.145	0.091	0.0506667	0.136	0.134	1.239	0.088	0.047	0.142	0.15	0.284	1.72	0.102	0.202	0.151	0.166	0.127	0.082	0.227	0.149	0.15	0.09	0.0853333	0.131	0.129	0.13
	01:45:12	0.138	0.134	0.133	0.088	0.047	0.13	0.136	0.136	0.089	0.045	0.131	0.13	0.13	0.087	0.0433333	0.142	0.189	0.145	0.09	0.0686667	0.139	0.143	0.146	0.09	0.0526667	0.136	0.133	1.237	0.088	0.0465	0.143	0.151	0.279	1.514	0.101	0.202	0.151	0.167	0.126	0.0823333	0.224	0.148	0.147	0.091	0.082	0.132	0.13	0.131
	02:00:12	0.139	0.135	0.134	0.088	0.048	0.132	0.137	0.137	0.089	0.0463333	0.131	0.131	0.131	0.087	0.044	0.144	0.187	0.146	0.09	0.069	0.14	0.145	0.147	0.09	0.054	0.136	0.133	1.237	0.088	0.0465	0.145	0.152	0.275	1.186	0.100667	0.201	0.153	0.168	0.125	0.083	0.221	0.149	0.15	0.09	0.0833333	0.133	0.132	0.132
	02:15:12	0.141	0.135	0.135	0.088	0.049	0.134	0.139	0.139	0.09	0.0473333	0.132	0.131	0.132	0.087	0.0446667	0.146	0.187	0.148	0.091	0.0693333	0.142	0.147	0.149	0.09	0.056	0.137	0.134	1.23	0.088	0.0475	0.146	0.154	0.273	1.54	0.101	0.2	0.155	0.17	0.123	0.084	0.221	0.15	0.149	0.09	0.0833333	0.135	0.134	0.134
	02:30:12	0.144	0.138	0.138	0.088	0.052	0.136	0.142	0.141	0.09	0.0496667	0.132	0.131	0.132	0.087	0.0446667	0.15	0.187	0.151	0.09	0.0726667	0.145	0.15	0.152	0.09	0.059	0.138	0.135	1.217	0.088	0.0485	0.149	0.157	0.272	1.684	0.102667	0.201	0.158	0.173	0.122	0.0863333	0.221	0.152	0.153	0.091	0.0843333	0.138	0.136	0.136
	02:45:12	0.147	0.141	0.141	0.088	0.055	0.139	0.145	0.144	0.089	0.0536667	0.132	0.132	0.133	0.087	0.0453333	0.153	0.19	0.154	0.09	0.0756667	0.149	0.154	0.156	0.09	0.063	0.139	0.136	1.205	0.088	0.0495	0.153	0.161	0.273	1.673	0.105667	0.205	0.154	0.177	0.121	0.0876667	0.221	0.154	0.155	0.091	0.0856667	0.141	0.139	0.139
	03:00:12	0.152	0.145	0.145	0.088	0.0593333	0.143	0.149	0.148	0.09	0.0566667	0.133	0.132	0.133	0.087	0.0456667	0.158	0.193	0.159	0.09	0.08	0.154	0.16	0.161	0.09	0.0683333	0.14	0.138	1.185	0.088	0.051	0.158	0.166	0.273	1.098	0.109	0.207	0.16	0.183	0.118	0.0923333	0.222	0.158	0.157	0.091	0.088	0.145	0.143	0.143
	03:15:12	0.158	0.15	0.15	0.088	0.0646667	0.148	0.154	0.154	0.089	0.063	0.134	0.133	0.134	0.087	0.0466667	0.165	0.199	0.166	0.09	0.0866667	0.16	0.166	0.167	0.09	0.0743333	0.143	0.14	1.165	0.088	0.0535	0.164	0.172	0.276	1.499	0.114	0.213	0.167	0.191	0.117	0.0993333	0.225	0.161	0.164	0.091	0.0923333	0.151	0.148	0.148
	03:30:12	0.166	0.157	0.157	0.088	0.072	0.154	0.161	0.16	0.089	0.0693333	0.134	0.134	0.135	0.087	0.0473333	0.173	0.173	0.173	0.09	0.083	0.167	0.175	0.175	0.09	0.0823333	0.146	0.143	1.143	0.088	0.0565	0.172	0.181	0.279	1.522	0.120667	0.223	0.176	0.202	0.116	0.109333	0.23	0.167	0.171	0.091	0.0983333	0.157	0.153	0.154
	03:45:12	0.175	0.165	0.165	0.088	0.0803333	0.162	0.17	0.169	0.089	0.078	0.136	0.136	0.137	0.087	0.0493333	0.182	0.184	0.184	0.09	0.0933333	0.177	0.185	0.186	0.09	0.0926667	0.15	0.147	1.118	0.088	0.0605	0.181	0.191	0.287	1.497	0.129667	0.232	0.187	0.215	0.115	0.121333	0.236	0.175	0.178	0.091	0.105333	0.165	0.161	0.162
	04:00:12	0.186	0.175	0.175	0.088	0.0906667	0.171	0.18	0.178	0.089	0.0873333	0.137	0.138	0.139	0.087	0.051	0.195	0.196	0.196	0.09	0.105667	0.189	0.198	0.197	0.09	0.104667	0.154	0.151	1.099	0.088	0.0645	0.193	0.204	0.294	1.688	0.140333	0.245	0.2	0.231	0.113	0.134333	0.245	0.183	0.186	0.091	0.113667	0.175	0.17	0.171
	04:15:12	0.2	0.187	0.188	0.088	0.103667	0.182	0.192	0.19	0.09	0.098	0.14	0.14	0.141	0.088	0.0523333	0.205	0.212	0.211	0.09	0.119333	0.203	0.213	0.212	0.09	0.119333	0.16	0.157	1.07	0.088	0.0705	0.207	0.219	0.308	1.218	0.154667	0.258	0.216	0.249	0.112	0.15	0.255	0.193	0.195	0.091	0.123333	0.187	0.181	0.182
	04:30:12	0.215	0.201	0.202	0.088	0.118	0.196	0.206	0.204	0.089	0.113	0.142	0.143	0.143	0.087	0.0556667	0.222	0.229	0.227	0.09	0.136	0.218	0.23	0.23	0.09	0.136	0.167	0.164	1.091	0.088	0.0775	0.224	0.237	0.319	1.379	0.17	0.276	0.234	0.269	0.11	0.168667	0.268	0.205	0.205	0.091	0.135	0.201	0.194	0.195
	04:45:12	0.235	0.218	0.22	0.088	0.136333	0.211	0.222	0.22	0.089	0.128667	0.144	0.146	0.147	0.087	0.0586667	0.242	0.249	0.246	0.09	0.155667	0.237	0.25	0.249	0.09	0.155333	0.175	0.171	1.068	0.088	0.085	0.243	0.257	0.338	1.772	0.189333	0.297	0.257	0.294	0.11	0.191667	0.281	0.218	0.218	0.091	0.148	0.219	0.209	0.21
	05:00:12	0.258	0.239	0.239	0.088	0.157333	0.228	0.241	0.239	0.09	0.146	0.148	0.15	0.151	0.087	0.0626667	0.265	0.272	0.268	0.09	0.178333	0.258	0.274	0.272	0.09	0.178	0.184	0.18	1.047	0.088	0.094	0.265	0.281	0.358	1.415	0.211333	0.322	0.281	0.321	0.109	0.217	0.299	0.234	0.233	0.091	0.164333	0.238	0.227	0.229
	05:15:12	0.285	0.262	0.262	0.088	0.181667	0.249	0.263	0.26	0.089	0.168333	0.152	0.154	0.155	0.087	0.0666667	0.291	0.298	0.292	0.09	0.203667	0.284	0.3	0.297	0.09	0.203667	0.193	0.19	1.025	0.087	0.1045	0.291	0.308	0.383	1.672	0.238333	0.35	0.31	0.353	0.092	0.246667	0.317	0.252	0.251	0.091	0.182333	0.261	0.247	0.25
	05:30:12	0.316	0.289	0.289	0.088	0.21	0.273	0.288	0.285	0.089	0.193	0.156	0.159	0.16	0.087	0.0713333	0.323	0.329	0.321	0.09	0.234333	0.314	0.332	0.328	0.09	0.234667	0.205	0.201	1.005	0.088	0.115	0.322	0.34	0.409	1.778	0.267	0.385	0.343	0.391	0.091	0.282	0.34	0.271	0.27	0.091	0.202667	0.288	0.27	0.274
	05:45:12	0.352	0.32	0.319	0.088	0.242333	0.301	0.318	0.315	0.09	0.221333	0.161	0.165	0.166	0.088	0.076	0.358	0.364	0.354	0.091	0.267667	0.349	0.368	0.362	0.091	0.268667	0.218	0.212	0.986	0.088	0.127	0.356	0.376	0.442	1.237	0.301333	0.425	0.381	0.432	0.091	0.321667	0.362	0.293	0.292	0.091	0.224667	0.318	0.298	0.301
	06:00:12	0.391	0.355	0.354	0.088	0.278667	0.332	0.351	0.349	0.09	0.254	0.166	0.171	0.172	0.087	0.0826667	0.397	0.403	0.389	0.09	0.306333	0.386	0.407	0.4	0.09	0.307667	0.232	0.226	0.97	0.088	0.141	0.395	0.415	0.479	1.674	0.339667	0.468	0.425	0.477	0.091	0.365667	0.39	0.317	0.317	0.091	0.250333	0.353	0.329	0.333
	06:15:12	0.438	0.393	0.393	0.088	0.32	0.369	0.388	0.387	0.089	0.292333	0.172	0.178	0.179	0.087	0.0893333	0.44	0.446	0.429	0.09	0.348333	0.428	0.451	0.445	0.09	0.351333	0.247	0.241	0.956	0.088	0.156	0.437	0.459	0.521	1.305	0.382333	0.515	0.472	0.525	0.091	0.413	0.419	0.345	0.343	0.091	0.278	0.392	0.364	0.368
	06:30:12	0.487	0.436	0.436	0.088	0.365	0.409	0.429	0.428	0.089	0.333	0.179	0.185	0.187	0.087	0.0966667	0.487	0.493	0.472	0.09	0.394	0.473	0.497	0.49	0.09	0.396667	0.263	0.256	0.944	0.088	0.1715	0.482	0.506	0.566	1.394	0.428	0.567	0.523	0.578	0.091	0.465	0.451	0.374	0.372	0.091	0.308	0.435	0.403	0.405
	06:45:12	0.539	0.483	0.482	0.088	0.413333	0.454	0.473	0.472	0.089	0.377333	0.186	0.194	0.195	0.087	0.104667	0.537	0.544	0.518	0.09	0.443	0.523	0.548	0.54	0.09	0.447	0.281	0.274	0.937	0.088	0.1895	0.533	0.556	0.614	1.647	0.477667	0.619	0.576	0.632	0.091	0.518	0.485	0.406	0.404	0.091	0.340667	0.483	0.445	0.447
	07:00:12	0.595	0.533	0.532	0.088	0.465333	0.499	0.522	0.52	0.089	0.424667	0.195	0.203	0.205	0.087	0.114	0.589	0.597	0.565	0.09	0.493667	0.572	0.602	0.592	0.09	0.498667	0.301	0.293	0.93	0.088	0.209	0.587	0.607	0.662	1.284	0.528667	0.675	0.632	0.687	0.091	0.573667	0.521	0.441	0.437	0.091	0.375333	0.532	0.49	0.49
	07:15:12	0.652	0.587	0.581	0.088	0.518667	0.547	0.57	0.572	0.09	0.473	0.204	0.212	0.214	0.088	0.122	0.642	0.652	0.615	0.09	0.546333	0.625	0.655	0.642	0.09	0.550667	0.322	0.313	0.929	0.088	0.2295	0.645	0.661	0.715	1.666	0.583667	0.732	0.69	0.744	0.091	0.631	0.561	0.476	0.473	0.091	0.412333	0.586	0.542	0.538
	07:30:12	0.708	0.641	0.632	0.088	0.572333	0.597	0.619	0.621	0.089	0.523333	0.212	0.223	0.225	0.087	0.133	0.699	0.708	0.666	0.09	0.601	0.676	0.708	0.69	0.09	0.601333	0.344	0.335	0.93	0.088	0.2515	0.702	0.718	0.768	1.28	0.639333	0.787	0.744	0.799	0.091	0.685667	0.599	0.513	0.51	0.09	0.450667	0.642	0.592	0.589
	07:45:12	0.761	0.693	0.685	0.088	0.625	0.646	0.668	0.67	0.089	0.572333	0.224	0.234	0.236	0.087	0.144333	0.753	0.764	0.716	0.09	0.654333	0.727	0.756	0.734	0.09	0.649	0.369	0.358	0.936	0.088	0.2755	0.76	0.775	0.82	1.667	0.695	0.838	0.795	0.85	0.091	0.736667	0.639	0.554	0.55	0.09	0.491	0.701	0.645	0.64
	08:00:12	0.815	0.745	0.737	0.088	0.677667	0.694	0.712	0.716	0.089	0.618333	0.234	0.247	0.247	0.087	0.155667	0.807	0.819	0.765	0.09	0.707	0.774	0.8	0.786	0.09	0.696667	0.394	0.382	0.943	0.088	0.3	0.818	0.829	0.873	1.28	0.75	0.883	0.841	0.899	0.091	0.783333	0.679	0.595	0.59	0.09	0.531333	0.758	0.7	0.693
	08:15:12	0.859	0.793	0.785	0.088	0.724333	0.738	0.752	0.759	0.09	0.659667	0.246	0.26	0.26	0.087	0.168333	0.856	0.871	0.814	0.09	0.757	0.823	0.842	0.834	0.09	0.743	0.422	0.408	0.953	0.088	0.327	0.872	0.882	0.924	1.663	0.802667	0.927	0.881	0.945	0.091	0.826667	0.72	0.635	0.629	0.09	0.571333	0.815	0.753	0.747
	08:30:12	0.903	0.84	0.835	0.088	0.771333	0.779	0.79	0.8	0.09	0.699667	0.259	0.273	0.275	0.087	0.182	0.906	0.92	0.859	0.09	0.805	0.868	0.884	0.883	0.09	0.788333	0.447	0.434	0.967	0.088	0.3525	0.924	0.931	0.973	1.293	0.852667	0.965	0.923	0.985	0.091	0.866667	0.761	0.673	0.669	0.09	0.611	0.865	0.806	0.797
	08:45:12	0.946	0.888	0.884	0.088	0.818	0.818	0.824	0.841	0.09	0.737667	0.272	0.287	0.289	0.088	0.194667	0.951	0.968	0.901	0.09	0.85	0.908	0.923	0.931	0.09	0.830667	0.475	0.462	0.982	0.088	0.3805	0.973	0.978	1.019	1.657	0.9	1.006	0.962	1.026	0.091	0.907	0.8	0.711	0.708	0.091	0.648667	0.916	0.857	0.847
	09:00:12	0.989	0.94	0.931	0.088	0.865333	0.855	0.856	0.878	0.089	0.774	0.286	0.303	0.303	0.087	0.210333	0.992	1.011	0.94	0.09	0.891	0.946	0.957	0.973	0.09	0.868667	0.503	0.489	0.997	0.088	0.408	1.017	1.02	1.063	1.312	0.943333	1.042	0.999	1.059	0.091	0.942333	0.835	0.747	0.744	0.09	0.685333	0.963	0.904	0.892
	09:15:12	1.029	0.986	0.973	0.088	0.908	0.891	0.888	0.916	0.089	0.809333	0.3	0.318	0.318	0.087	0.225	1.03	1.056	0.979	0.09	0.931667	0.983	0.99	1.014	0.09	0.905667	0.53	0.515	1.016	0.087	0.4355	1.058	1.06	1.098	1.654	0.983	1.078	1.034	1.094	0.09	0.978667	0.873	0.781	0.781	0.09	0.721667	1.009	0.948	0.937
	09:30:12	1.068	1.028	1.014	0.088	0.948667	0.925	0.919	0.951	0.089	0.842667	0.316	0.334	0.334	0.087	0.241	1.067	1.097	1.017	0.09	0.970333	1.016	1.022	1.049	0.09	0.939	0.557	0.542	0.687	0.088	0.4615	1.099	1.099	1.14	1.324	1.02367	1.112	1.067	1.125	0.091	1.01033	0.906	0.814	0.813	0.09	0.754333	1.049	0.992	0.978
	09:45:12	1.104	1.071	1.051	0.088	0.987333	0.958	0.947	0.984	0.089	0.874	0.332	0.351	0.349	0.087	0.257	1.102	1.137	1.054	0.09	1.00767	1.048	1.052	1.083	0.09	0.971	0.585	0.568	0.723	0.088	0.4885	1.135	1.135	1.173	1.652	1.05767	1.147	1.096	1.153	0.091	1.041	0.938	0.845	0.843	0.09	0.785333	1.088	1.032	1.016
	10:00:12	1.137	1.113	1.087	0.088	1.02433	0.988	0.972	1.014	0.089	0.902333	0.347	0.368	0.366	0.088	0.272333	1.134	1.174	1.087	0.09	1.04167	1.078	1.078	1.113	0.09	0.999667	0.611	0.593	0.751	0.088	0.514	1.17	1.172	1.205	1.321	1.09233	1.177	1.126	1.185	0.091	1.07167	0.969	0.871	0.861	0.09	0.810333	1.125	1.071	1.052
	10:15:12	1.171	1.147	1.121	0.088	1.05833	1.017	0.997	1.043	0.089	0.93	0.364	0.385	0.382	0.087	0.29	1.165	1.209	1.119	0.09	1.07433	1.105	1.102	1.142	0.09	1.02633	0.635	0.615	0.779	0.087	0.538	1.202	1.207	1.238	1.393	1.12567	1.214	1.155	1.204	0.091	1.1	1.003	0.897	0.886	0.09	0.838667	1.157	1.108	1.088
	10:30:12	1.2	1.182	1.153	0.088	1.09033	1.044	1.021	1.068	0.09	0.954333	0.38	0.402	0.4	0.088	0.306	1.196	1.243	1.149	0.09	1.106	1.128	1.123	1.168	0.09	1.04967	0.657	0.638	0.803	0.088	0.5595	1.232	1.238	1.271	1.352	1.157	1.244	1.178	1.228	0.091	1.12567	1.031	0.921	0.908	0.09	0.863333	1.188	1.141	1.122
	10:45:12	1.23	1.215	1.184	0.088	1.12167	1.068	1.042	1.091	0.089	0.978	0.397	0.42	0.417	0.087	0.324333	1.223	1.274	1.178	0.09	1.135	1.152	1.143	1.191	0.09	1.072	0.68	0.658	0.826	0.087	0.582	1.26	1.266	1.304	1.647	1.18667	1.272	1.202	1.251	0.091	1.15067	1.049	0.942	0.926	0.09	0.882333	1.215	1.173	1.152
	11:00:12	1.258	1.247	1.211	0.088	1.15067	1.088	1.057	1.111	0.09	0.995333	0.413	0.437	0.432	0.087	0.340333	1.249	1.304	1.204	0.09	1.16233	1.172	1.161	1.214	0.09	1.09233	0.699	0.677	0.846	0.087	0.601	1.287	1.294	1.333	1.35	1.21467	1.305	1.222	1.271	0.09	1.176	1.062	0.958	0.941	0.09	0.897	1.242	1.203	1.182
	11:15:12	1.285	1.276	1.239	0.088	1.17867	1.1	1.068	1.125	0.09	1.00767	0.429	0.453	0.448	0.087	0.356333	1.273	1.331	1.227	0.09	1.187	1.188	1.176	1.233	0.09	1.109	0.719	0.697	0.863	0.087	0.621	1.312	1.318	1.361	1.816	1.24133	1.299	1.241	1.289	0.091	1.18533	1.071	0.969	0.949	0.09	0.906333	1.267	1.232	1.208
	11:30:12	1.308	1.305	1.266	0.088	1.205	1.106	1.087	1.13	0.09	1.01767	0.445	0.469	0.466	0.087	0.373	1.296	1.357	1.251	0.09	1.21133	1.202	1.187	1.246	0.09	1.12167	0.735	0.713	0.872	0.087	0.637	1.334	1.343	1.39	1.865	1.26567	1.296	1.255	1.3	0.09	1.19367	1.08	0.974	0.954	0.09	0.912667	1.292	1.258	1.235
	11:45:12	1.331	1.33	1.292	0.088	1.22967	1.107	1.134	1.131	0.09	1.034	0.461	0.485	0.48	0.088	0.387333	1.317	1.381	1.273	0.09	1.23367	1.208	1.194	1.255	0.09	1.129	0.751	0.728	0.879	0.087	0.6525	1.356	1.364	1.413	1.886	1.28767	1.267	1.263	1.306	0.09	1.18867	1.089	0.979	0.957	0.09	0.918333	1.312	1.283	1.259
	12:00:12	1.352	1.353	1.315	0.088	1.252	1.104	1.204	1.131	0.09	1.05633	0.477	0.5	0.495	0.087	0.403667	1.336	1.402	1.294	0.09	1.254	1.21	1.194	1.26	0.09	1.13133	0.763	0.738	0.886	0.087	0.6635	1.374	1.385	1.43	1.897	1.30633	1.273	1.267	1.31	0.091	1.19233	1.1	0.981	0.959	0.09	0.923333	1.33	1.306	1.28
	12:15:12	1.367	1.372	1.335	0.088	1.27	1.104	1.236	1.129	0.089	1.06733	0.49	0.516	0.509	0.087	0.418	1.352	1.422	1.314	0.09	1.27267	1.209	1.194	1.264	0.09	1.13233	0.773	0.748	0.888	0.087	0.6735	1.386	1.403	1.447	1.909	1.323	1.275	1.269	1.325	0.09	1.19967	1.109	0.976	0.961	0.09	0.925333	1.343	1.327	1.301
	12:30:12	1.381	1.389	1.352	0.088	1.286	1.103	1.217	1.128	0.089	1.06033	0.506	0.529	0.523	0.087	0.432333	1.363	1.441	1.333	0.09	1.289	1.21	1.194	1.267	0.09	1.13367	0.778	0.753	0.893	0.087	0.6785	1.397	1.418	1.456	1.931	1.33467	1.28	1.271	1.328	0.09	1.203	1.127	0.989	0.963	0.09	0.936333	1.352	1.347	1.317
	12:45:12	1.394	1.403	1.367	0.088	1.3	1.102	1.207	1.127	0.089	1.05633	0.519	0.543	0.536	0.087	0.445667	1.373	1.455	1.349	0.09	1.30233	1.21	1.194	1.271	0.09	1.135	0.782	0.756	0.894	0.087	0.682	1.407	1.431	1.46	1.948	1.34367	1.31	1.272	1.334	0.09	1.21533	1.168	1.105	0.964	0.09	0.989	1.36	1.356	1.331
	13:00:12	1.405	1.416	1.38	0.088	1.31233	1.104	1.206	1.129	0.089	1.05733	0.533	0.553	0.55	0.087	0.458333	1.382	1.466	1.362	0.09	1.31333	1.214	1.194	1.274	0.09	1.13733	0.785	0.76	0.898	0.087	0.6855	1.415	1.44	1.461	1.955	1.34867	1.315	1.276	1.337	0.091	1.21833	1.269	1.145	0.965	0.09	1.03633	1.367	1.355	1.341
	13:15:12	1.413	1.428	1.393	0.088	1.32333	1.107	1.217	1.133	0.09	1.06233	0.545	0.565	0.561	0.087	0.47	1.391	1.476	1.373	0.09	1.32333	1.216	1.198	1.278	0.09	1.14067	0.788	0.761	0.9	0.087	0.6875	1.424	1.445	1.459	1.962	1.35367	1.337	1.279	1.34	0.09	1.22867	1.319	1.153	0.967	0.09	1.05633	1.372	1.355	1.349
	13:30:12	1.419	1.437	1.403	0.088	1.33167	1.113	1.237	1.138	0.09	1.07267	0.555	0.576	0.573	0.087	0.481	1.399	1.486	1.384	0.09	1.333	1.221	1.202	1.282	0.09	1.145	0.79	0.764	0.903	0.087	0.69	1.429	1.44	1.461	1.969	1.35333	1.365	1.282	1.343	0.09	1.24	1.332	1.183	0.971	0.09	1.072	1.369	1.435	1.356
	13:45:12	1.422	1.445	1.41	0.088	1.33767	1.117	1.268	1.144	0.09	1.08633	0.566	0.584	0.581	0.087	0.49	1.404	1.494	1.394	0.09	1.34067	1.225	1.208	1.287	0.09	1.15	0.793	0.766	0.905	0.087	0.6925	1.433	1.465	1.47	1.977	1.366	1.38	1.284	1.347	0.09	1.247	1.335	1.202	0.976	0.09	1.081	1.354	1.515	1.365
	14:00:12	1.425	1.451	1.417	0.088	1.343	1.123	1.304	1.147	0.09	1.10133	0.576	0.592	0.589	0.087	0.498667	1.408	1.501	1.403	0.09	1.34733	1.23	1.212	1.292	0.09	1.15467	0.796	0.768	0.908	0.087	0.695	1.435	1.538	1.477	1.577	1.39333	1.389	1.288	1.35	0.09	1.25233	1.339	1.23	0.979	0.09	1.09267	1.387	1.507	1.371
	14:15:12	1.427	1.453	1.421	0.088	1.34567	1.128	1.343	1.147	0.09	1.116	0.583	0.598	0.593	0.087	0.504333	1.41	1.507	1.412	0.09	1.353	1.234	1.217	1.296	0.09	1.159	0.799	0.77	0.912	0.087	0.6975	1.436	1.54	1.484	1.513	1.39767	1.398	1.294	1.351	0.09	1.25767	1.342	1.26	0.985	0.09	1.10567	1.467	1.518	1.376
	14:30:12	1.427	1.448	1.425	0.088	1.34533	1.132	1.385	1.14	0.09	1.129	0.59	0.601	0.599	0.088	0.508667	1.412	1.511	1.419	0.09	1.35733	1.237	1.221	1.301	0.09	1.163	0.8	0.773	0.914	0.087	0.6995	1.435	1.542	1.495	1.423	1.40067	1.406	1.301	1.35	0.09	1.26233	1.351	1.297	0.989	0.09	1.12233	1.506	1.536	1.382
	14:45:12	1.428	1.442	1.427	0.088	1.34433	1.136	1.426	1.152	0.09	1.148	0.595	0.604	0.603	0.087	0.513667	1.413	1.514	1.426	0.09	1.361	1.24	1.224	1.305	0.09	1.16633	0.803	0.777	0.917	0.087	0.703	1.433	1.556	1.5	1.448	1.40633	1.408	1.306	1.347	0.09	1.26367	1.357	1.332	0.993	0.09	1.13733	1.5	1.561	1.384
	15:00:12	1.428	1.48	1.429	0.088	1.35767	1.139	1.463	1.218	0.089	1.18433	0.599	0.607	0.607	0.087	0.517333	1.413	1.515	1.431	0.09	1.363	1.242	1.226	1.309	0.09	1.169	0.805	0.78	0.918	0.087	0.7055	1.428	1.568	1.504	1.421	1.411	1.427	1.3	1.346	0.09	1.26767	1.373	1.371	0.998	0.09	1.15733	1.504	1.591	1.377
	15:15:12	1.428	1.541	1.428	0.088	1.37767	1.142	1.496	1.315	0.09	1.22767	0.603	0.612	0.61	0.088	0.520333	1.413	1.517	1.436	0.09	1.36533	1.243	1.228	1.312	0.09	1.171	0.81	0.782	0.918	0.087	0.709	1.422	1.579	1.513	1.428	1.41467	1.443	1.296	1.351	0.09	1.27333	1.4	1.414	1	0.09	1.18133	1.513	1.626	1.361
	15:30:12	1.427	1.558	1.426	0.088	1.38233	1.144	1.527	1.336	0.09	1.24567	0.605	0.614	0.614	0.087	0.524	1.413	1.519	1.439	0.09	1.367	1.244	1.23	1.315	0.09	1.173	0.813	0.786	0.914	0.087	0.7125	1.417	1.591	1.517	1.462	1.41933	1.447	1.302	1.357	0.09	1.27867	1.432	1.452	1.003	0.09	1.20567	1.528	1.663	1.42
	15:45:12	1.426	1.539	1.419	0.088	1.37333	1.146	1.553	1.337	0.09	1.25533	0.609	0.616	0.617	0.088	0.526	1.413	1.519	1.441	0.09	1.36767	1.244	1.233	1.318	0.09	1.175	0.815	0.789	0.905	0.087	0.715	1.419	1.603	1.513	1.446	1.42167	1.463	1.325	1.369	0.09	1.29567	1.475	1.489	1.006	0.09	1.23333	1.55	1.701	1.513
	16:00:12	1.425	1.537	1.412	0.088	1.37	1.147	1.573	1.356	0.09	1.26867	0.61	0.619	0.619	0.088	0.528	1.413	1.52	1.444	0.09	1.369	1.24	1.234	1.32	0.09	1.17467	0.818	0.791	0.897	0.087	0.7175	1.43	1.613	1.509	1.439	1.42733	1.47	1.361	1.383	0.09	1.31467	1.514	1.528	1.006	0.09	1.25933	1.576	1.738	1.513
	16:15:12	1.424	1.543	1.431	0.088	1.378	1.149	1.585	1.388	0.089	1.285	0.609	0.621	0.623	0.087	0.530667	1.412	1.52	1.447	0.09	1.36967	1.229	1.236	1.322	0.09	1.17233	0.821	0.792	0.961	0.087	0.7195	1.45	1.626	1.508	1.422	1.439	1.476	1.371	1.398	0.09	1.325	1.556	1.574	1.009	0.09	1.28967	1.604	1.772	1.504
	16:30:12	1.422	1.552	1.48	0.088	1.39667	1.149	1.586	1.426	0.09	1.297	0.612	0.623	0.625	0.087	0.533	1.412	1.52	1.45	0.09	1.37067	1.214	1.237	1.325	0.09	1.16867	0.824	0.786	1.057	0.087	0.718	1.481	1.639	1.506	1.426	1.452	1.482	1.374	1.418	0.09	1.33467	1.595	1.626	1.011	0.09	1.32067	1.629	1.802	1.509
	16:45:12	1.42	1.565	1.523	0.088	1.41467	1.15	1.579	1.469	0.09	1.30933	0.666	0.621	0.628	0.088	0.550333	1.411	1.52	1.449	0.09	1.37	1.21	1.237	1.327	0.09	1.168	0.822	0.806	1.145	0.087	0.727	1.518	1.652	1.504	1.444	1.468	1.486	1.383	1.439	0.09	1.346	1.626	1.677	1.01	0.09	1.34767	1.653	1.827	1.519
	17:00:12	1.416	1.583	1.528	0.088	1.421	1.151	1.565	1.505	0.09	1.317	0.781	0.619	0.631	0.088	0.589	1.411	1.519	1.442	0.09	1.36733	1.231	1.238	1.329	0.09	1.176	0.817	0.872	1.203	0.087	0.7575	1.525	1.666	1.502	1.427	1.47433	1.492	1.398	1.461	0.09	1.36033	1.653	1.724	1.012	0.09	1.373	1.671	1.849	1.538
	17:15:12	1.41	1.604	1.517	0.088	1.42233	1.152	1.546	1.536	0.09	1.32133	0.878	0.644	0.632	0.087	0.631	1.41	1.518	1.434	0.09	1.364	1.285	1.24	1.331	0.09	1.19533	0.822	0.963	1.263	0.087	0.8055	1.505	1.679	1.498	1.438	1.47067	1.497	1.418	1.481	0.09	1.37533	1.674	1.767	1.014	0.09	1.395	1.687	1.869	1.561
	17:30:12	1.398	1.624	1.522	0.088	1.42667	1.153	1.525	1.559	0.089	1.32333	0.881	0.733	0.634	0.087	0.662333	1.409	1.518	1.449	0.09	1.36867	1.363	1.239	1.332	0.09	1.22133	0.873	1.008	1.327	0.087	0.8535	1.497	1.693	1.5	1.445	1.47433	1.502	1.442	1.496	0.09	1.39	1.69	1.8	1.015	0.09	1.41167	1.7	1.887	1.586
	17:45:12	1.384	1.642	1.535	0.088	1.43233	1.153	1.502	1.574	0.089	1.32067	0.882	0.853	0.637	0.088	0.702667	1.409	1.518	1.486	0.09	1.381	1.436	1.24	1.334	0.09	1.24667	0.955	1.004	1.391	0.087	0.8925	1.496	1.708	1.501	1.464	1.47833	1.507	1.47	1.512	0.09	1.40633	1.702	1.823	1.015	0.09	1.42333	1.711	1.905	1.611
	18:00:12	1.384	1.657	1.552	0.088	1.443	1.154	1.484	1.579	0.09	1.31567	0.891	0.914	0.64	0.088	0.727	1.409	1.517	1.525	0.09	1.39367	1.495	1.237	1.336	0.09	1.266	1.025	1.015	1.456	0.087	0.933	1.501	1.72	1.501	1.465	1.484	1.512	1.5	1.526	0.09	1.42267	1.719	1.841	1.017	0.09	1.43567	1.72	1.922	1.635
	18:15:12	1.4	1.669	1.572	0.088	1.459	1.154	1.47	1.578	0.09	1.31067	0.902	0.928	0.642	0.088	0.736	1.408	1.516	1.547	0.09	1.40033	1.543	1.237	1.336	0.09	1.282	1.041	1.036	1.518	0.087	0.9515	1.502	1.731	1.504	1.493	1.489	1.519	1.528	1.539	0.09	1.43867	1.738	1.857	1.017	0.09	1.44733	1.727	1.937	1.656
	18:30:12	1.421	1.68	1.595	0.088	1.47733	1.155	1.456	1.573	0.09	1.30467	0.916	0.95	0.646	0.087	0.750333	1.407	1.515	1.56	0.09	1.404	1.577	1.231	1.337	0.09	1.29167	1.046	1.06	1.575	0.087	0.966	1.504	1.741	1.506	1.494	1.49367	1.523	1.558	1.55	0.09	1.45367	1.761	1.869	1.018	0.09	1.45933	1.732	1.951	1.678
	18:45:12	1.444	1.689	1.618	0.088	1.49567	1.156	1.444	1.564	0.09	1.298	0.932	0.978	0.646	0.088	0.764	1.406	1.513	1.575	0.09	1.408	1.601	1.225	1.339	0.09	1.29833	1.063	1.086	1.631	0.087	0.9875	1.508	1.749	1.508	1.504	1.49833	1.526	1.585	1.561	0.09	1.46733	1.783	1.881	1.017	0.09	1.47033	1.737	1.964	1.698
	19:00:12	1.468	1.696	1.64	0.088	1.51333	1.157	1.429	1.553	0.09	1.28967	0.954	1.014	0.647	0.087	0.784667	1.403	1.511	1.595	0.09	1.413	1.622	1.228	1.339	0.09	1.30633	1.085	1.117	1.683	0.087	1.014	1.514	1.756	1.51	1.52	1.50333	1.528	1.611	1.572	0.09	1.48033	1.804	1.889	1.015	0.09	1.47933	1.74	1.975	1.718
	19:15:12	1.488	1.701	1.659	0.088	1.528	1.158	1.406	1.543	0.09	1.279	0.985	1.056	0.649	0.087	0.809667	1.399	1.509	1.614	0.09	1.41733	1.642	1.258	1.339	0.09	1.323	1.113	1.153	1.734	0.087	1.046	1.518	1.762	1.51	1.557	1.50667	1.531	1.634	1.581	0.09	1.492	1.82	1.905	1.009	0.09	1.488	1.743	1.987	1.736
	19:30:12	1.505	1.706	1.677	0.088	1.54133	1.158	1.396	1.533	0.09	1.27233	1.024	1.103	0.65	0.087	0.838667	1.391	1.505	1.633	0.09	1.41967	1.659	1.31	1.34	0.09	1.34633	1.146	1.197	1.781	0.087	1.0845	1.523	1.767	1.51	1.551	1.51	1.533	1.656	1.59	0.09	1.503	1.832	1.911	1.002	0.09	1.49167	1.745	1.996	1.755
	19:45:12	1.519	1.709	1.69	0.088	1.55133	1.157	1.395	1.523	0.09	1.26833	1.068	1.151	0.648	0.087	0.868667	1.388	1.498	1.651	0.09	1.42233	1.677	1.371	1.341	0.09	1.373	1.187	1.246	1.819	0.087	1.1295	1.528	1.771	1.51	1.57	1.513	1.535	1.678	1.599	0.09	1.514	1.844	1.917	1.028	0.09	1.50633	1.748	2.002	1.771
	20:00:12	1.532	1.711	1.702	0.088	1.56033	1.158	1.396	1.509	0.09	1.26433	1.114	1.2	0.665	0.087	0.906	1.4	1.5	1.668	0.09	1.43267	1.692	1.401	1.341	0.09	1.388	1.235	1.303	1.852	0.087	1.182	1.534	1.775	1.51	1.588	1.51633	1.537	1.696	1.607	0.09	1.52333	1.857	1.923	1.109	0.09	1.53967	1.75	2.008	1.786
	20:15:12	1.544	1.713	1.71	0.088	1.56767	1.159	1.4	1.5	0.089	1.264	1.16	1.25	0.721	0.087	0.956667	1.425	1.523	1.682	0.09	1.45333	1.701	1.397	1.337	0.09	1.38833	1.285	1.362	1.88	0.087	1.2365	1.54	1.778	1.51	1.617	1.51933	1.538	1.712	1.614	0.09	1.53133	1.87	1.931	1.211	0.09	1.58067	1.752	2.015	1.8
	20:30:12	1.552	1.715	1.718	0.088	1.57367	1.159	1.403	1.487	0.09	1.25967	1.208	1.303	0.81	0.087	1.02	1.457	1.564	1.697	0.09	1.48267	1.708	1.398	1.329	0.09	1.38833	1.338	1.427	1.901	0.087	1.2955	1.546	1.782	1.51	1.643	1.52267	1.539	1.723	1.622	0.09	1.538	1.878	1.94	1.225	0.089	1.592	1.755	2.02	1.812
	20:45:12	1.558	1.717	1.724	0.088	1.57833	1.16	1.409	1.476	0.09	1.25833	1.261	1.357	0.872	0.087	1.07633	1.478	1.608	1.71	0.09	1.50867	1.711	1.415	1.32	0.09	1.392	1.398	1.489	1.92	0.087	1.3565	1.554	1.784	1.51	1.656	1.526	1.54	1.722	1.632	0.09	1.54133	1.884	1.95	1.217	0.09	1.59367	1.757	2.025	1.824
	21:00:12	1.562	1.719	1.73	0.088	1.58233	1.161	1.418	1.466	0.09	1.25833	1.315	1.408	0.877	0.088	1.112	1.471	1.622	1.722	0.09	1.515	1.711	1.436	1.321	0.09	1.39933	1.458	1.548	1.936	0.087	1.416	1.561	1.787	1.511	1.674	1.52967	1.54	1.717	1.634	0.09	1.54033	1.889	1.951	1.226	0.09	1.59867	1.759	2.026	1.834
	21:15:12	1.563	1.72	1.735	0.088	1.58467	1.161	1.426	1.459	0.09	1.25867	1.368	1.458	0.88	0.087	1.14833	1.458	1.619	1.733	0.09	1.51333	1.707	1.462	1.342	0.09	1.41367	1.52	1.601	1.95	0.087	1.4735	1.567	1.789	1.512	1.694	1.53267	1.541	1.723	1.635	0.09	1.543	1.894	1.954	1.242	0.09	1.60667	1.761	2.028	1.844
	00:00:00																									#DIV/0!
	00:00:00
	00:00:00
	00:00:00
	00:00:00
	00:00:00
	00:00:00
	00:00:00
	00:00:00
	00:00:00
	00:00:00
	00:00:00
	00:00:00
	00:00:00
	00:00:00
	00:00:00
	00:00:00
	00:00:00
	00:00:00
	00:00:00
	00:00:00
	00:00:00
	00:00:00
	00:00:00
	00:00:00
	00:00:00
	00:00:00
	00:00:00
	00:00:00
	00:00:00
	00:00:00
	00:00:00
	00:00:00
	00:00:00
	00:00:00
	00:00:00
	00:00:00
	00:00:00
	00:00:00
	00:00:00
	00:00:00
	00:00:00
	00:00:00
	00:00:00
	00:00:00
	00:00:00
	00:00:00
	00:00:00
	00:00:00
	00:00:00
	00:00:00
	00:00:00
	00:00:00
	00:00:00
	00:00:00
	00:00:00
	00:00:00
	00:00:00
	00:00:00
	00:00:00
	00:00:00
	00:00:00
	00:00:00
	00:00:00
	00:00:00
	00:00:00
	00:00:00
	00:00:00
	00:00:00
	00:00:00
	00:00:00
	00:00:00
	00:00:00
	00:00:00
	00:00:00
	00:00:00
	00:00:00
	00:00:00
	00:00:00
	00:00:00
	00:00:00
	00:00:00
	00:00:00
	00:00:00
	00:00:00
	00:00:00
	00:00:00
	00:00:00
	00:00:00
	00:00:00
	00:00:00
	00:00:00
	00:00:00
	00:00:00
	00:00:00
	00:00:00
	00:00:00
	00:00:00
	00:00:00
	00:00:00
	00:00:00
	00:00:00
	00:00:00
	00:00:00
	00:00:00
	00:00:00
	00:00:00
	00:00:00
	00:00:00
	00:00:00
	00:00:00
	00:00:00
	00:00:00
	00:00:00
	00:00:00
	00:00:00
	00:00:00
	00:00:00
	00:00:00
	00:00:00
	00:00:00
	00:00:00
	00:00:00
	00:00:00
	00:00:00
	00:00:00
	00:00:00
	00:00:00
	00:00:00
	00:00:00
	00:00:00
	00:00:00
	00:00:00
	00:00:00
	00:00:00
	00:00:00
	00:00:00
	00:00:00
	00:00:00
	00:00:00
	00:00:00
	00:00:00
	00:00:00
	00:00:00
	00:00:00
	00:00:00
	00:00:00
	00:00:00
	00:00:00
	00:00:00
	00:00:00
	00:00:00
	00:00:00
	00:00:00
	00:00:00
	00:00:00
	00:00:00
	00:00:00
	00:00:00
	00:00:00
	00:00:00
	00:00:00
	00:00:00
	00:00:00
	00:00:00
	00:00:00
	00:00:00
	00:00:00
	00:00:00
	00:00:00
	00:00:00
	00:00:00
	00:00:00
	00:00:00
	00:00:00
	00:00:00
	00:00:00
	00:00:00
	00:00:00
	00:00:00
	00:00:00
	00:00:00
	00:00:00
	00:00:00
	00:00:00
	00:00:00
	00:00:00
	00:00:00
	00:00:00
	00:00:00
	00:00:00
	00:00:00
	00:00:00
	00:00:00
	00:00:00
	00:00:00
	00:00:00
	00:00:00
	00:00:00
	00:00:00
	00:00:00
	00:00:00
	00:00:00
Results
		2	3	4	5		6	7	8	9		10	11	12
	A	3.526	3.435	-0.013	3.258		3.249	3.697	-0.009	5		5.333	3.954	0.004	Max V [600]
		1	1	0.74	1		1	0.94	0.486	0.943		0.966	0.958	0.9	R-Squared [600]
		07:30:12	07:30:12	00:30:12	07:30:12		07:15:12	15:00:12	00:30:12	17:00:12		17:30:12	20:15:12	00:45:12	t at Max V [600]
		05:04:19	05:02:30	?????	05:05:42		04:59:07	10:01:39	?????	14:52:18		15:32:23	17:38:20	02:25:12	Lagtime [600]
	B	3.707	3.345	-0.006	4.517		3.528	3.345	-0.008	3.931		4.118	-5.521	-0.011	Max V [600]
		1	1	0.614	0.997		1	1	0.766	0.966		1	0.656	0.688	R-Squared [600]
		07:30:12	07:30:12	06:15:12	17:30:12		07:00:12	07:00:12	12:15:12	17:45:12		20:30:12	09:15:12	12:00:12	t at Max V [600]
		05:01:48	04:51:35	05:35:12	12:56:19		04:46:21	04:43:03	11:10:12	14:17:07		15:13:49	08:22:12	10:05:30	Lagtime [600]
	C	3.723	3.511	-10.371	3.689		3.71	-17.545	0.399	-8.795		3.389	4.189	-2.299	Max V [600]
		1	1	0.879	1		1	0.749	0.854	0.751		0.895	0.949	0.7	R-Squared [600]
		07:30:12	07:30:12	14:00:12	07:00:12		07:00:12	00:30:12	00:30:12	01:15:12		12:45:12	20:00:12	00:45:12	t at Max V [600]
		04:59:02	04:53:40	14:23:08	04:37:48		04:47:39	?????	?????	00:56:45		08:09:45	16:04:46	00:34:32	Lagtime [600]
	D	3.578	3.487	-0.007	3.377		3.469	3.473	-0.009	3.504		3.617	3.748	-0.006	Max V [600]
		1	1	0.393	1		1	1	0.671	1		1	1	0.368	R-Squared [600]
		08:00:12	08:00:12	00:30:12	07:30:12		07:45:12	07:45:12	00:30:12	07:45:12		07:45:12	07:45:12	00:30:12	t at Max V [600]
		05:21:26	05:19:10	?????	04:47:21		05:09:52	05:14:01	?????	05:12:49		05:13:30	05:12:07	?????	Lagtime [600]
	E	4.569	3.456	-0.011	-0.006		0.005	-0.006	0.005	0.008		-0.008	-0.007	0.005	Max V [600]
		0.989	0.989	0.557	0.233		0.721	0.471	0.941	0.973		0.35	0.414	0.696	R-Squared [600]
		20:00:12	18:45:12	00:30:12	00:30:12		17:45:12	00:30:12	00:45:12	02:30:12		00:30:12	00:30:12	02:30:12	t at Max V [600]
		16:56:34	14:57:45	?????	?????		17:28:03	?????	01:18:57	02:07:42		?????	?????	02:18:57	Lagtime [600]
	F	5.922	3.057	0.009	0.005		-0.005	-0.005	-0.006	-0.009		-0.007	0.006	-0.006	Max V [600]
		0.995	0.946	0.579	0.889		0.5	0.421	0.431	0.5		0.5	0.75	0.471	R-Squared [600]
		16:45:12	15:15:12	00:30:12	00:45:12		00:30:12	00:30:12	00:30:12	00:30:12		00:30:12	05:45:12	00:30:12	t at Max V [600]
		13:50:40	10:44:42	?????	00:33:57		?????	?????	?????	?????		?????	06:31:52	?????	Lagtime [600]
	G	3.449	-10.229	0.008	-0.005		-0.005	-0.006	0.014	-0.005		-0.006	-0.007	-0.007	Max V [600]
		0.999	0.725	0.837	0.696		0.5	0.471	0.829	0.235		0.368	0.368	0.368	R-Squared [600]
		13:45:12	03:00:12	00:45:12	12:15:12		00:30:12	00:30:12	02:15:12	00:30:12		00:30:12	00:30:12	00:30:12	t at Max V [600]
		06:56:21	03:36:12	01:17:42	10:48:57		?????	?????	01:42:21	?????		?????	?????	?????	Lagtime [600]
	H	3.51	3.512	-0.006	0.005		-0.005	0.005	-0.006	-0.004		-0.005	0.006	-0.005	Max V [600]
		1	0.873	0.302	0.49		0.721	0.817	0.281	0.75		0.235	0.88	0.727	R-Squared [600]
		07:00:12	12:15:12	00:30:12	10:00:12		09:15:12	19:00:12	00:30:12	12:00:12		00:30:12	00:45:12	11:00:12	t at Max V [600]
		04:31:50	06:25:28	?????	11:04:29		07:45:12	20:04:29	?????	10:50:12		?????	01:45:12	09:41:27	Lagtime [600]
[truncated: 32 more columns]
