# Supplementary material for: Bacterial–fungal interactions in the neonatal gut influence asthma outcomes later in life
Source: eLife. 2021 Apr 20;10:e67740. doi: 10.7554/eLife.67740 (PMC8075585; doi:10.7554/eLife.67740)
Supplement: Figure 4—source data 7. [file elife-67740-fig4-data7.xlsx]

## Sheet: Plate 1 - Sheet1
Software Version	3.05.11
Experiment File Path:	C:\Users\Plate Reader\Documents\Roz\Pichia_071019.xpt
Protocol File Path:	C:\Users\Plate Reader\Documents\Roz\Pichia_GC.prt
Plate Number	Plate 1
Date	2019-07-10
Time	15:32:27
Reader Type:	Synergy H1
Reader Serial Number:	1905217
Reading Type	Reader
Procedure Details
Plate Type	96 WELL PLATE (Use plate lid)
Eject plate on completion
Set Temperature	Setpoint 37°C
	Preheat before moving to next step
Start Kinetic	Runtime 72:00:00 (HH:MM:SS), Interval 0:15:00, 289 Reads
Shake	Orbital: 0:10 (MM:SS)
	Frequency: 282 cpm (3 mm)
Read	Absorbance Endpoint
	Full Plate
	Wavelengths: 600
	Read Speed: Normal, Delay: 100 msec, Measurements/Data Point: 8
End Kinetic
600
	Time	T° 600	A1	A2	A3	A4	A5	A6	A7	A8	A9	A10	A11	A12	B1	B2	B3	B4	B5	B6	B7	B8	B9	B10	B11	B12	C1	C2	C3	C4	C5	C6	C7	C8	C9	C10	C11	C12	D1	D2	D3	D4	D5	D6	D7	D8	D9	D10	D11
	00:00:12	37	0.288	0.289	0.302	0.271	0.354	0.345	0.352	0.277	0.352	0.318	0.31	0.252	0.337	0.349	0.341	0.33	0.337	0.376	0.387	0.309	0.398	0.367	0.364	0.275	0.35	0.279	0.359	0.315	0.365	0.364	0.373	0.319	0.376	0.375	0.333	0.28	0.363	0.34	0.346	0.32	0.365	0.36	0.346	0.295	0.349	0.343	0.339
	00:15:12	37	0.114	0.115	0.118	0.094	0.137	0.147	0.154	0.095	0.153	0.145	0.14	0.094	0.119	0.12	0.134	0.134	0.176	0.191	0.211	0.115	0.18	0.162	0.146	0.092	0.118	0.123	0.152	0.167	0.215	0.223	0.216	0.168	0.202	0.166	0.147	0.093	0.134	0.121	0.167	0.162	0.204	0.174	0.182	0.094	0.15	0.145	0.151
	00:30:12	37	0.115	0.115	0.119	0.095	0.138	0.148	0.156	0.095	0.155	0.146	0.141	0.094	0.121	0.119	0.116	0.094	0.137	0.156	0.171	0.094	0.183	0.164	0.149	0.092	0.118	0.124	0.129	0.093	0.136	0.14	0.144	0.094	0.15	0.165	0.149	0.093	0.134	0.121	0.127	0.096	0.141	0.133	0.147	0.092	0.151	0.147	0.155
	00:45:12	37	0.115	0.115	0.119	0.095	0.139	0.15	0.158	0.094	0.157	0.147	0.143	0.094	0.122	0.119	0.117	0.095	0.138	0.159	0.174	0.095	0.186	0.167	0.15	0.092	0.118	0.124	0.129	0.093	0.138	0.142	0.147	0.094	0.152	0.168	0.151	0.093	0.135	0.121	0.128	0.096	0.142	0.135	0.149	0.092	0.154	0.149	0.158
	01:00:12	37	0.115	0.115	0.12	0.095	0.141	0.153	0.16	0.095	0.158	0.148	0.144	0.094	0.122	0.12	0.117	0.095	0.139	0.162	0.178	0.095	0.19	0.17	0.152	0.092	0.118	0.125	0.13	0.093	0.14	0.144	0.149	0.094	0.155	0.171	0.154	0.093	0.135	0.122	0.128	0.096	0.144	0.136	0.151	0.092	0.156	0.151	0.16
	01:15:12	37	0.116	0.116	0.121	0.095	0.142	0.155	0.163	0.094	0.16	0.15	0.145	0.094	0.123	0.12	0.118	0.095	0.141	0.166	0.182	0.095	0.193	0.173	0.154	0.092	0.119	0.126	0.131	0.093	0.142	0.147	0.151	0.094	0.157	0.175	0.157	0.093	0.136	0.123	0.13	0.096	0.147	0.139	0.154	0.092	0.159	0.154	0.163
	01:30:12	37	0.117	0.118	0.122	0.095	0.144	0.158	0.166	0.095	0.162	0.151	0.146	0.094	0.125	0.122	0.119	0.095	0.143	0.17	0.186	0.095	0.196	0.176	0.157	0.092	0.12	0.128	0.133	0.093	0.145	0.15	0.154	0.094	0.16	0.178	0.16	0.093	0.137	0.124	0.132	0.096	0.15	0.141	0.158	0.092	0.163	0.158	0.168
	01:45:12	37	0.119	0.119	0.123	0.094	0.146	0.162	0.17	0.094	0.164	0.153	0.148	0.094	0.126	0.123	0.121	0.095	0.146	0.174	0.191	0.095	0.199	0.178	0.16	0.092	0.122	0.129	0.134	0.093	0.148	0.154	0.158	0.094	0.162	0.182	0.164	0.093	0.138	0.126	0.134	0.096	0.153	0.145	0.161	0.092	0.167	0.162	0.172
	02:00:12	37	0.12	0.12	0.125	0.094	0.15	0.167	0.175	0.094	0.166	0.155	0.15	0.094	0.128	0.125	0.124	0.095	0.15	0.18	0.197	0.096	0.203	0.182	0.163	0.092	0.124	0.131	0.136	0.093	0.152	0.157	0.162	0.094	0.166	0.186	0.168	0.093	0.14	0.128	0.137	0.096	0.158	0.149	0.166	0.092	0.171	0.166	0.178
	02:15:12	37	0.121	0.122	0.127	0.094	0.154	0.172	0.18	0.094	0.169	0.158	0.153	0.094	0.131	0.127	0.126	0.095	0.153	0.186	0.203	0.096	0.208	0.187	0.167	0.091	0.126	0.134	0.139	0.093	0.157	0.163	0.167	0.094	0.17	0.192	0.173	0.093	0.142	0.13	0.14	0.096	0.163	0.153	0.172	0.092	0.178	0.172	0.184
	02:30:12	37	0.124	0.124	0.13	0.094	0.158	0.179	0.187	0.094	0.172	0.161	0.155	0.094	0.134	0.13	0.129	0.095	0.159	0.194	0.213	0.096	0.214	0.192	0.172	0.092	0.128	0.137	0.142	0.093	0.162	0.17	0.173	0.094	0.175	0.198	0.179	0.093	0.145	0.133	0.143	0.096	0.169	0.159	0.178	0.092	0.185	0.179	0.192
	02:45:12	37	0.128	0.127	0.134	0.094	0.164	0.186	0.195	0.094	0.175	0.164	0.159	0.094	0.138	0.134	0.132	0.095	0.165	0.203	0.224	0.095	0.222	0.199	0.177	0.092	0.132	0.141	0.146	0.093	0.169	0.177	0.181	0.094	0.181	0.207	0.186	0.093	0.148	0.137	0.148	0.096	0.176	0.166	0.185	0.092	0.193	0.186	0.2
	03:00:12	37	0.132	0.131	0.138	0.094	0.17	0.196	0.204	0.094	0.179	0.167	0.162	0.094	0.143	0.139	0.137	0.095	0.172	0.215	0.236	0.095	0.23	0.207	0.184	0.092	0.136	0.146	0.152	0.093	0.176	0.186	0.191	0.094	0.188	0.216	0.195	0.093	0.153	0.142	0.154	0.096	0.184	0.174	0.194	0.092	0.202	0.195	0.21
	03:15:12	37	0.137	0.135	0.143	0.094	0.179	0.207	0.214	0.094	0.184	0.171	0.166	0.094	0.149	0.144	0.142	0.095	0.181	0.228	0.251	0.095	0.241	0.216	0.191	0.092	0.141	0.152	0.157	0.093	0.187	0.197	0.202	0.094	0.196	0.227	0.204	0.093	0.159	0.148	0.161	0.096	0.195	0.183	0.204	0.092	0.213	0.206	0.221
	03:30:12	37	0.142	0.141	0.149	0.094	0.189	0.22	0.227	0.094	0.19	0.176	0.17	0.094	0.156	0.15	0.149	0.095	0.191	0.244	0.27	0.095	0.254	0.226	0.2	0.092	0.147	0.158	0.164	0.093	0.198	0.21	0.215	0.094	0.206	0.239	0.216	0.093	0.165	0.154	0.169	0.096	0.206	0.194	0.216	0.092	0.227	0.219	0.237
	03:45:12	37	0.148	0.146	0.156	0.094	0.2	0.235	0.241	0.094	0.195	0.181	0.175	0.094	0.164	0.157	0.157	0.095	0.202	0.262	0.289	0.095	0.266	0.237	0.21	0.092	0.154	0.166	0.172	0.093	0.211	0.225	0.229	0.094	0.216	0.253	0.228	0.093	0.172	0.161	0.177	0.096	0.219	0.208	0.23	0.092	0.242	0.233	0.253
	04:00:12	37	0.157	0.154	0.165	0.094	0.214	0.253	0.258	0.095	0.202	0.187	0.18	0.094	0.174	0.166	0.166	0.095	0.217	0.282	0.313	0.095	0.282	0.25	0.221	0.092	0.162	0.175	0.182	0.093	0.228	0.242	0.248	0.094	0.228	0.268	0.244	0.093	0.181	0.17	0.188	0.096	0.237	0.222	0.245	0.092	0.26	0.251	0.272
	04:15:12	37	0.167	0.162	0.175	0.094	0.229	0.273	0.278	0.094	0.209	0.194	0.186	0.094	0.185	0.177	0.175	0.095	0.231	0.306	0.338	0.094	0.297	0.266	0.234	0.092	0.172	0.186	0.194	0.093	0.247	0.261	0.269	0.094	0.243	0.287	0.26	0.093	0.191	0.181	0.201	0.096	0.254	0.24	0.264	0.092	0.281	0.272	0.296
	04:30:12	37	0.178	0.172	0.186	0.094	0.246	0.295	0.3	0.094	0.217	0.202	0.194	0.094	0.2	0.189	0.188	0.095	0.251	0.334	0.368	0.094	0.316	0.281	0.249	0.092	0.183	0.199	0.206	0.093	0.268	0.284	0.291	0.094	0.259	0.307	0.278	0.093	0.203	0.193	0.214	0.096	0.275	0.261	0.285	0.092	0.304	0.294	0.322
	04:45:12	37	0.19	0.184	0.2	0.094	0.266	0.322	0.324	0.094	0.226	0.21	0.202	0.094	0.215	0.202	0.201	0.095	0.274	0.364	0.401	0.094	0.336	0.299	0.265	0.092	0.197	0.214	0.221	0.093	0.291	0.309	0.318	0.094	0.276	0.329	0.297	0.093	0.216	0.207	0.23	0.096	0.298	0.285	0.31	0.092	0.331	0.321	0.35
	05:00:12	37	0.205	0.197	0.216	0.094	0.289	0.351	0.353	0.094	0.235	0.219	0.21	0.094	0.233	0.217	0.215	0.095	0.297	0.4	0.439	0.094	0.356	0.318	0.282	0.092	0.214	0.229	0.237	0.093	0.319	0.339	0.348	0.094	0.295	0.351	0.319	0.093	0.232	0.222	0.247	0.096	0.324	0.309	0.337	0.092	0.362	0.351	0.381
	05:15:12	37	0.223	0.213	0.235	0.094	0.315	0.382	0.383	0.094	0.246	0.229	0.221	0.094	0.255	0.235	0.234	0.095	0.325	0.438	0.48	0.094	0.378	0.34	0.302	0.092	0.232	0.248	0.257	0.093	0.35	0.373	0.384	0.094	0.317	0.376	0.344	0.093	0.249	0.24	0.268	0.096	0.353	0.338	0.368	0.092	0.395	0.385	0.416
	05:30:12	37	0.243	0.232	0.255	0.094	0.344	0.418	0.417	0.094	0.258	0.24	0.23	0.094	0.277	0.256	0.253	0.095	0.352	0.481	0.525	0.094	0.401	0.364	0.322	0.092	0.253	0.269	0.28	0.093	0.387	0.412	0.424	0.094	0.34	0.404	0.37	0.093	0.269	0.262	0.291	0.096	0.386	0.369	0.403	0.093	0.432	0.422	0.458
	05:45:12	37	0.266	0.253	0.278	0.094	0.377	0.456	0.453	0.094	0.27	0.252	0.242	0.094	0.305	0.279	0.276	0.095	0.387	0.528	0.577	0.094	0.427	0.389	0.344	0.092	0.278	0.293	0.306	0.093	0.427	0.453	0.469	0.094	0.365	0.432	0.398	0.093	0.289	0.284	0.317	0.096	0.42	0.402	0.44	0.092	0.472	0.464	0.503
	06:00:12	37	0.292	0.277	0.304	0.094	0.412	0.496	0.494	0.094	0.283	0.264	0.254	0.094	0.336	0.304	0.299	0.095	0.426	0.579	0.624	0.094	0.454	0.416	0.367	0.092	0.306	0.321	0.337	0.093	0.472	0.502	0.519	0.094	0.391	0.465	0.429	0.093	0.315	0.311	0.349	0.096	0.458	0.44	0.48	0.092	0.512	0.509	0.551
	06:15:12	37.1	0.32	0.306	0.333	0.094	0.451	0.541	0.538	0.094	0.296	0.278	0.267	0.094	0.371	0.333	0.326	0.095	0.472	0.631	0.673	0.094	0.48	0.444	0.393	0.092	0.339	0.353	0.371	0.093	0.525	0.552	0.574	0.094	0.423	0.499	0.462	0.093	0.345	0.34	0.384	0.096	0.499	0.48	0.523	0.092	0.561	0.561	0.603
	06:30:12	37	0.352	0.336	0.366	0.094	0.495	0.589	0.581	0.094	0.311	0.291	0.281	0.094	0.409	0.365	0.356	0.095	0.518	0.689	0.726	0.094	0.508	0.472	0.42	0.092	0.373	0.385	0.407	0.093	0.577	0.607	0.629	0.094	0.454	0.531	0.499	0.093	0.377	0.373	0.422	0.096	0.544	0.524	0.574	0.092	0.613	0.613	0.661
	06:45:12	37	0.389	0.37	0.402	0.094	0.541	0.642	0.632	0.094	0.327	0.307	0.295	0.094	0.451	0.4	0.389	0.095	0.572	0.743	0.781	0.094	0.536	0.505	0.449	0.092	0.414	0.423	0.448	0.093	0.635	0.662	0.69	0.094	0.486	0.566	0.538	0.093	0.416	0.409	0.464	0.096	0.593	0.572	0.627	0.092	0.666	0.67	0.718
	07:00:12	37	0.427	0.408	0.441	0.094	0.591	0.695	0.682	0.094	0.343	0.323	0.312	0.094	0.497	0.442	0.426	0.095	0.626	0.798	0.833	0.094	0.567	0.535	0.484	0.092	0.459	0.466	0.498	0.093	0.698	0.722	0.747	0.094	0.519	0.601	0.574	0.093	0.455	0.451	0.509	0.096	0.643	0.624	0.682	0.092	0.726	0.732	0.776
	07:15:12	37	0.472	0.452	0.484	0.094	0.641	0.748	0.735	0.094	0.36	0.34	0.328	0.094	0.552	0.486	0.466	0.095	0.682	0.854	0.883	0.094	0.595	0.565	0.509	0.092	0.507	0.514	0.549	0.093	0.759	0.776	0.807	0.094	0.553	0.639	0.615	0.093	0.5	0.495	0.559	0.096	0.695	0.673	0.74	0.092	0.785	0.794	0.835
	07:30:12	37.1	0.519	0.499	0.532	0.094	0.695	0.796	0.784	0.094	0.378	0.358	0.346	0.094	0.607	0.535	0.508	0.095	0.736	0.908	0.931	0.094	0.625	0.595	0.542	0.092	0.561	0.564	0.603	0.093	0.82	0.834	0.862	0.094	0.59	0.669	0.656	0.093	0.551	0.543	0.609	0.096	0.748	0.724	0.797	0.092	0.839	0.855	0.893
	07:45:12	37	0.572	0.547	0.584	0.094	0.75	0.847	0.833	0.094	0.396	0.376	0.365	0.094	0.664	0.59	0.559	0.095	0.791	0.958	0.974	0.094	0.654	0.625	0.574	0.092	0.621	0.616	0.663	0.093	0.882	0.89	0.917	0.094	0.628	0.703	0.697	0.093	0.603	0.6	0.663	0.096	0.797	0.777	0.856	0.092	0.898	0.915	0.956
	08:00:12	37	0.625	0.601	0.635	0.094	0.802	0.895	0.879	0.094	0.416	0.396	0.385	0.094	0.722	0.645	0.606	0.095	0.843	1.005	1.021	0.094	0.685	0.654	0.607	0.092	0.681	0.673	0.722	0.093	0.944	0.944	0.968	0.094	0.662	0.738	0.732	0.093	0.654	0.655	0.718	0.096	0.85	0.831	0.913	0.092	0.956	0.972	1.014
	08:15:12	37	0.681	0.656	0.691	0.094	0.854	0.94	0.923	0.094	0.436	0.415	0.406	0.094	0.782	0.704	0.655	0.095	0.896	1.038	1.065	0.094	0.709	0.682	0.638	0.092	0.74	0.732	0.784	0.093	1	0.991	1.02	0.094	0.681	0.767	0.767	0.093	0.713	0.712	0.774	0.096	0.904	0.88	0.971	0.092	1.01	1.028	1.065
	08:30:12	37	0.738	0.715	0.745	0.094	0.902	0.973	0.965	0.094	0.458	0.435	0.427	0.094	0.844	0.762	0.708	0.095	0.944	1.091	1.104	0.094	0.738	0.708	0.668	0.092	0.804	0.79	0.848	0.093	1.053	1.038	1.064	0.094	0.715	0.799	0.801	0.093	0.771	0.771	0.831	0.096	0.952	0.93	1.023	0.092	1.059	1.077	1.12
	08:45:12	37	0.795	0.773	0.802	0.094	0.95	1.012	1.007	0.094	0.478	0.456	0.447	0.094	0.9	0.82	0.76	0.095	0.986	1.124	1.14	0.094	0.762	0.734	0.699	0.092	0.864	0.851	0.907	0.093	1.1	1.084	1.107	0.094	0.746	0.825	0.831	0.093	0.829	0.836	0.885	0.096	0.997	0.981	1.076	0.092	1.107	1.128	1.165
	09:00:12	36.9	0.852	0.828	0.86	0.094	0.995	1.051	1.044	0.094	0.499	0.476	0.469	0.094	0.954	0.877	0.813	0.095	1.026	1.149	1.174	0.094	0.786	0.757	0.727	0.092	0.927	0.908	0.965	0.093	1.143	1.123	1.144	0.094	0.779	0.853	0.858	0.093	0.885	0.889	0.937	0.096	1.043	1.024	1.125	0.092	1.153	1.173	1.211
	09:15:12	37	0.907	0.88	0.912	0.094	1.034	1.085	1.08	0.094	0.519	0.496	0.493	0.094	1.006	0.931	0.865	0.095	1.07	1.193	1.206	0.094	0.809	0.779	0.754	0.092	0.983	0.963	1.022	0.093	1.182	1.16	1.177	0.094	0.807	0.875	0.883	0.093	0.94	0.942	0.986	0.096	1.085	1.068	1.17	0.092	1.198	1.212	1.25
	09:30:12	37	0.964	0.934	0.964	0.094	1.072	1.117	1.112	0.094	0.538	0.519	0.514	0.094	1.059	0.985	0.917	0.095	1.107	1.226	1.235	0.094	0.828	0.802	0.778	0.092	1.036	1.018	1.074	0.093	1.221	1.196	1.211	0.094	0.836	0.866	0.91	0.093	0.992	0.994	1.033	0.096	1.125	1.109	1.212	0.092	1.24	1.25	1.287
	09:45:12	37	1.014	0.983	1.012	0.094	1.107	1.145	1.142	0.094	0.558	0.537	0.537	0.094	1.106	1.036	0.967	0.095	1.139	1.239	1.262	0.094	0.848	0.822	0.802	0.092	1.09	1.067	1.119	0.093	1.255	1.23	1.242	0.094	0.863	0.889	0.934	0.093	1.044	1.046	1.078	0.096	1.16	1.149	1.251	0.092	1.277	1.288	1.323
	10:00:12	37	1.063	1.033	1.058	0.094	1.139	1.176	1.168	0.094	0.577	0.559	0.557	0.094	1.151	1.083	1.015	0.095	1.169	1.273	1.285	0.094	0.769	0.84	0.824	0.092	1.14	1.111	1.165	0.093	1.287	1.26	1.27	0.094	0.886	0.908	0.956	0.093	1.089	1.091	1.119	0.096	1.194	1.183	1.288	0.092	1.309	1.326	1.354
	10:15:12	37	1.107	1.077	1.1	0.094	1.167	1.197	1.192	0.094	0.594	0.579	0.577	0.094	1.192	1.127	1.059	0.095	1.196	1.296	1.305	0.094	0.785	0.859	0.846	0.092	1.186	1.153	1.21	0.093	1.313	1.285	1.294	0.094	0.91	0.924	0.978	0.093	1.133	1.132	1.161	0.096	1.225	1.217	1.323	0.092	1.343	1.355	1.386
	10:30:12	37	1.15	1.121	1.142	0.094	1.188	1.213	1.209	0.094	0.614	0.597	0.595	0.094	1.231	1.166	1.097	0.095	1.217	1.288	1.32	0.094	0.801	0.872	0.865	0.092	1.232	1.196	1.25	0.093	1.335	1.306	1.315	0.094	0.928	0.941	0.995	0.093	1.176	1.173	1.195	0.096	1.255	1.246	1.355	0.093	1.372	1.383	1.41
	10:45:12	37	1.192	1.157	1.182	0.094	1.198	1.221	1.216	0.094	0.63	0.614	0.615	0.094	1.265	1.205	1.138	0.095	1.229	1.314	1.325	0.094	0.814	0.884	0.879	0.092	1.271	1.234	1.285	0.093	1.35	1.32	1.328	0.094	0.943	0.954	1.009	0.093	1.216	1.21	1.227	0.096	1.28	1.274	1.381	0.092	1.399	1.412	1.437
	11:00:12	37	1.232	1.198	1.216	0.094	1.202	1.224	1.216	0.094	0.647	0.631	0.632	0.094	1.298	1.239	1.173	0.095	1.235	1.297	1.328	0.094	0.822	0.893	0.891	0.092	1.305	1.266	1.319	0.093	1.359	1.328	1.338	0.094	0.951	0.962	1.017	0.093	1.251	1.243	1.258	0.096	1.304	1.302	1.405	0.092	1.424	1.435	1.463
	11:15:12	37	1.265	1.23	1.248	0.094	1.204	1.227	1.217	0.094	0.663	0.645	0.648	0.094	1.327	1.273	1.206	0.095	1.238	1.317	1.331	0.094	0.827	0.898	0.897	0.092	1.337	1.297	1.348	0.093	1.364	1.332	1.341	0.094	0.958	0.967	1.024	0.093	1.282	1.276	1.286	0.096	1.325	1.323	1.426	0.092	1.445	1.458	1.487
	11:30:12	37	1.298	1.258	1.28	0.094	1.204	1.228	1.217	0.094	0.676	0.661	0.662	0.094	1.353	1.304	1.235	0.095	1.24	1.298	1.333	0.094	0.832	0.902	0.904	0.092	1.364	1.325	1.374	0.093	1.369	1.337	1.342	0.094	0.965	0.972	1.026	0.093	1.31	1.305	1.312	0.096	1.345	1.341	1.439	0.092	1.459	1.476	1.513
	11:45:12	37	1.328	1.288	1.307	0.094	1.202	1.229	1.217	0.094	0.689	0.674	0.679	0.094	1.369	1.33	1.256	0.095	1.241	1.319	1.334	0.094	0.835	0.905	0.91	0.092	1.388	1.35	1.39	0.093	1.373	1.341	1.345	0.094	0.967	0.975	1.031	0.093	1.333	1.331	1.332	0.096	1.355	1.352	1.451	0.092	1.471	1.489	1.535
	12:00:12	37	1.354	1.197	1.331	0.094	1.202	1.231	1.22	0.094	0.701	0.687	0.691	0.094	1.384	1.353	1.274	0.095	1.246	1.303	1.339	0.094	0.838	0.906	0.911	0.092	1.405	1.37	1.403	0.093	1.378	1.346	1.347	0.094	0.971	0.977	1.034	0.093	1.352	1.353	1.349	0.096	1.365	1.363	1.462	0.092	1.479	1.498	1.563
	12:15:12	37	1.375	1.218	1.349	0.094	1.204	1.235	1.221	0.094	0.709	0.695	0.701	0.094	1.395	1.367	1.288	0.095	1.25	1.325	1.344	0.094	0.839	0.909	0.914	0.092	1.42	1.383	1.415	0.093	1.382	1.35	1.352	0.094	0.973	0.98	1.037	0.093	1.364	1.368	1.36	0.096	1.373	1.373	1.471	0.092	1.489	1.508	1.591
	12:30:12	37	1.393	1.244	1.359	0.094	1.207	1.24	1.225	0.094	0.717	0.704	0.709	0.094	1.408	1.379	1.3	0.095	1.255	1.313	1.348	0.094	0.845	0.912	0.916	0.092	1.432	1.393	1.424	0.093	1.387	1.355	1.357	0.094	0.976	0.982	1.039	0.093	1.373	1.38	1.369	0.096	1.381	1.382	1.481	0.092	1.499	1.517	1.626
	12:45:12	37	1.408	1.265	1.362	0.094	1.212	1.246	1.232	0.094	0.723	0.711	0.717	0.094	1.418	1.39	1.313	0.095	1.26	1.336	1.354	0.094	0.848	0.915	0.919	0.092	1.444	1.402	1.435	0.093	1.391	1.361	1.361	0.094	0.977	0.984	1.043	0.093	1.384	1.388	1.379	0.096	1.387	1.391	1.488	0.092	1.504	1.526	1.657
	13:00:12	37	1.419	1.291	1.382	0.094	1.217	1.252	1.237	0.094	0.729	0.715	0.723	0.094	1.427	1.401	1.322	0.095	1.265	1.324	1.359	0.094	0.85	0.917	0.923	0.092	1.452	1.407	1.443	0.093	1.396	1.366	1.365	0.094	0.981	0.985	1.044	0.093	1.393	1.395	1.387	0.096	1.393	1.399	1.494	0.092	1.512	1.533	1.671
	13:15:12	37	1.431	1.305	1.434	0.094	1.223	1.258	1.243	0.094	0.732	0.72	0.727	0.094	1.432	1.41	1.333	0.095	1.272	1.346	1.363	0.094	0.853	0.919	0.926	0.092	1.458	1.405	1.448	0.093	1.401	1.371	1.369	0.094	0.986	0.987	1.048	0.093	1.401	1.404	1.393	0.096	1.397	1.405	1.499	0.092	1.515	1.538	1.668
	13:30:12	37	1.44	1.326	1.49	0.094	1.229	1.264	1.249	0.094	0.736	0.723	0.732	0.094	1.437	1.417	1.338	0.095	1.277	1.333	1.368	0.094	0.857	0.923	0.93	0.092	1.463	1.402	1.452	0.093	1.405	1.375	1.374	0.094	0.991	0.991	1.051	0.093	1.406	1.411	1.4	0.096	1.401	1.411	1.503	0.092	1.519	1.542	1.656
	13:45:12	37	1.447	1.335	1.49	0.094	1.235	1.268	1.253	0.094	0.74	0.727	0.735	0.094	1.441	1.424	1.343	0.095	1.282	1.355	1.372	0.094	0.859	0.926	0.933	0.092	1.468	1.457	1.453	0.093	1.408	1.378	1.378	0.094	0.997	0.994	1.051	0.093	1.411	1.416	1.405	0.096	1.401	1.413	1.505	0.093	1.52	1.545	1.645
	14:00:12	37	1.452	1.345	1.482	0.094	1.239	1.273	1.257	0.094	0.744	0.73	0.739	0.094	1.442	1.428	1.346	0.095	1.286	1.342	1.376	0.094	0.862	0.931	0.938	0.092	1.471	1.513	1.455	0.093	1.411	1.381	1.382	0.094	1	0.998	1.045	0.093	1.414	1.419	1.41	0.096	1.402	1.417	1.506	0.093	1.523	1.547	1.636
	14:15:12	37	1.455	1.352	1.486	0.094	1.242	1.276	1.261	0.094	0.746	0.734	0.743	0.094	1.444	1.431	1.349	0.095	1.288	1.361	1.378	0.094	0.866	0.935	0.941	0.092	1.472	1.506	1.454	0.093	1.413	1.384	1.385	0.094	1.004	1.001	1.06	0.093	1.417	1.42	1.413	0.096	1.409	1.419	1.506	0.093	1.524	1.548	1.633
	14:30:12	37	1.458	1.352	1.494	0.094	1.245	1.28	1.263	0.094	0.749	0.737	0.746	0.094	1.445	1.433	1.351	0.095	1.29	1.346	1.382	0.094	0.87	0.939	0.946	0.092	1.474	1.51	1.452	0.093	1.416	1.386	1.387	0.094	1.008	1.004	1.144	0.093	1.418	1.417	1.413	0.096	1.423	1.42	1.507	0.093	1.525	1.55	1.631
	14:45:12	37	1.46	1.355	1.503	0.094	1.246	1.281	1.265	0.095	0.754	0.74	0.75	0.094	1.446	1.434	1.353	0.095	1.289	1.365	1.382	0.094	0.872	0.941	0.95	0.092	1.476	1.521	1.449	0.093	1.418	1.389	1.389	0.094	1.011	1.005	1.25	0.093	1.419	1.408	1.409	0.096	1.444	1.422	1.509	0.093	1.526	1.549	1.633
	15:00:12	37	1.46	1.356	1.514	0.094	1.247	1.282	1.267	0.094	0.758	0.743	0.754	0.094	1.446	1.434	1.353	0.095	1.284	1.35	1.383	0.094	0.877	0.943	0.953	0.092	1.476	1.537	1.446	0.093	1.42	1.39	1.391	0.094	1.013	0.997	1.248	0.093	1.421	1.419	1.399	0.096	1.469	1.422	1.509	0.092	1.525	1.55	1.637
	15:15:12	37.1	1.461	1.357	1.53	0.094	1.249	1.283	1.27	0.094	0.759	0.746	0.757	0.094	1.447	1.434	1.356	0.095	1.28	1.368	1.385	0.094	0.878	0.946	0.957	0.092	1.474	1.557	1.447	0.093	1.421	1.391	1.391	0.094	1.015	1.004	1.251	0.093	1.421	1.463	1.405	0.096	1.494	1.424	1.51	0.092	1.526	1.55	1.64
	15:30:12	37	1.461	1.361	1.55	0.094	1.249	1.284	1.27	0.094	0.761	0.748	0.76	0.094	1.447	1.433	1.357	0.095	1.3	1.354	1.386	0.094	0.882	0.949	0.959	0.091	1.474	1.582	1.448	0.093	1.422	1.391	1.392	0.094	1.016	1.072	1.267	0.093	1.421	1.515	1.448	0.096	1.512	1.424	1.51	0.092	1.527	1.55	1.645
	15:45:12	37	1.462	1.359	1.573	0.094	1.249	1.285	1.27	0.094	0.762	0.752	0.762	0.094	1.447	1.43	1.357	0.095	1.35	1.369	1.386	0.094	0.882	0.951	0.961	0.092	1.474	1.605	1.448	0.093	1.423	1.39	1.393	0.094	1.016	1.177	1.288	0.093	1.42	1.526	1.518	0.096	1.519	1.425	1.51	0.092	1.527	1.55	1.654
	16:00:12	37	1.462	1.363	1.594	0.094	1.251	1.286	1.273	0.094	0.76	0.753	0.764	0.094	1.448	1.426	1.358	0.095	1.398	1.356	1.387	0.094	0.884	0.953	0.963	0.092	1.474	1.627	1.442	0.093	1.424	1.383	1.393	0.094	1.013	1.183	1.32	0.093	1.419	1.524	1.536	0.096	1.516	1.426	1.51	0.092	1.527	1.549	1.667
	16:15:12	37	1.463	1.363	1.613	0.094	1.251	1.287	1.273	0.094	0.76	0.756	0.768	0.094	1.448	1.418	1.358	0.095	1.38	1.372	1.387	0.094	0.885	0.955	0.965	0.092	1.473	1.647	1.445	0.093	1.425	1.375	1.395	0.094	1.006	1.179	1.36	0.093	1.417	1.527	1.517	0.096	1.516	1.426	1.511	0.092	1.525	1.549	1.683
	16:30:12	37	1.463	1.361	1.628	0.094	1.253	1.287	1.274	0.094	0.801	0.757	0.769	0.094	1.448	1.411	1.359	0.095	1.367	1.358	1.389	0.094	0.886	0.956	0.967	0.092	1.471	1.665	1.452	0.093	1.427	1.418	1.395	0.094	1.003	1.186	1.409	0.093	1.414	1.537	1.516	0.096	1.519	1.425	1.511	0.093	1.525	1.548	1.7
	16:45:12	37	1.463	1.352	1.645	0.094	1.252	1.287	1.276	0.094	0.896	0.76	0.77	0.094	1.449	1.413	1.36	0.095	1.373	1.372	1.389	0.094	0.885	0.957	0.967	0.092	1.47	1.681	1.459	0.093	1.427	1.465	1.396	0.094	1.032	1.201	1.463	0.093	1.407	1.55	1.523	0.096	1.525	1.425	1.511	0.092	1.521	1.546	1.716
	17:00:12	37	1.463	1.362	1.659	0.094	1.253	1.288	1.276	0.094	0.939	0.762	0.768	0.094	1.449	1.433	1.36	0.095	1.392	1.355	1.39	0.094	0.886	0.958	0.968	0.092	1.468	1.694	1.468	0.093	1.428	1.484	1.396	0.094	1.105	1.224	1.52	0.093	1.4	1.565	1.533	0.096	1.532	1.422	1.511	0.093	1.514	1.544	1.728
	17:15:12	36.9	1.463	1.4	1.672	0.094	1.253	1.287	1.277	0.094	0.927	0.763	0.778	0.094	1.449	1.463	1.361	0.095	1.41	1.349	1.389	0.094	0.887	0.959	0.969	0.092	1.46	1.704	1.473	0.093	1.427	1.488	1.396	0.094	1.193	1.255	1.578	0.093	1.408	1.582	1.545	0.096	1.54	1.413	1.511	0.093	1.5	1.534	1.74
	17:30:12	37.1	1.463	1.446	1.685	0.094	1.254	1.286	1.277	0.094	0.931	0.765	0.817	0.094	1.449	1.488	1.362	0.095	1.428	1.345	1.39	0.094	0.889	0.961	0.97	0.092	1.443	1.714	1.482	0.093	1.429	1.49	1.396	0.094	1.223	1.296	1.635	0.093	1.439	1.599	1.56	0.096	1.548	1.408	1.511	0.092	1.492	1.521	1.748
	17:45:12	37	1.463	1.466	1.695	0.094	1.255	1.282	1.278	0.094	0.939	0.766	0.877	0.094	1.449	1.497	1.361	0.095	1.448	1.358	1.391	0.094	0.888	0.96	0.969	0.091	1.444	1.724	1.492	0.093	1.429	1.495	1.395	0.094	1.227	1.343	1.693	0.093	1.489	1.615	1.577	0.096	1.562	1.418	1.511	0.092	1.501	1.528	1.754
	18:00:12	37	1.463	1.463	1.704	0.094	1.256	1.275	1.279	0.094	0.954	0.769	0.919	0.094	1.45	1.5	1.36	0.095	1.473	1.401	1.391	0.094	0.888	0.962	0.97	0.092	1.484	1.732	1.503	0.093	1.429	1.503	1.394	0.094	1.244	1.398	1.746	0.093	1.537	1.631	1.595	0.096	1.58	1.45	1.51	0.093	1.54	1.567	1.76
	18:15:12	37	1.462	1.462	1.711	0.094	1.256	1.271	1.28	0.095	0.971	0.771	0.92	0.094	1.45	1.502	1.36	0.095	1.501	1.445	1.391	0.094	0.887	0.962	0.97	0.092	1.524	1.738	1.514	0.093	1.429	1.515	1.388	0.094	1.275	1.456	1.797	0.093	1.551	1.647	1.612	0.096	1.601	1.496	1.51	0.093	1.591	1.614	1.764
	18:30:12	37	1.462	1.469	1.719	0.094	1.256	1.277	1.28	0.094	0.996	0.772	0.919	0.094	1.45	1.506	1.36	0.095	1.529	1.458	1.391	0.094	0.888	0.962	0.97	0.092	1.544	1.745	1.523	0.093	1.429	1.532	1.377	0.094	1.317	1.517	1.842	0.093	1.543	1.66	1.629	0.096	1.623	1.538	1.511	0.093	1.637	1.65	1.765
	18:45:12	36.9	1.462	1.471	1.727	0.094	1.256	1.304	1.281	0.094	1.027	0.773	0.927	0.094	1.449	1.511	1.36	0.095	1.552	1.463	1.391	0.094	0.89	0.962	0.968	0.092	1.546	1.75	1.532	0.093	1.428	1.552	1.379	0.094	1.366	1.581	1.881	0.093	1.538	1.673	1.646	0.096	1.646	1.539	1.511	0.093	1.659	1.671	1.768
	19:00:12	37	1.462	1.48	1.733	0.094	1.256	1.338	1.281	0.094	1.063	0.773	0.937	0.094	1.449	1.518	1.359	0.095	1.568	1.484	1.39	0.094	0.891	0.96	0.962	0.092	1.546	1.753	1.54	0.093	1.429	1.576	1.412	0.094	1.421	1.65	1.912	0.093	1.54	1.685	1.661	0.096	1.669	1.525	1.51	0.093	1.665	1.684	1.77
	19:15:12	37	1.462	1.494	1.74	0.094	1.257	1.37	1.281	0.094	1.103	0.774	0.952	0.094	1.45	1.525	1.357	0.095	1.579	1.497	1.388	0.094	0.89	0.957	0.958	0.092	1.546	1.756	1.547	0.093	1.429	1.599	1.467	0.094	1.478	1.712	1.937	0.093	1.546	1.696	1.675	0.096	1.69	1.52	1.512	0.093	1.671	1.694	1.771
	19:30:12	36.9	1.461	1.505	1.743	0.094	1.258	1.376	1.282	0.094	1.148	0.775	0.97	0.094	1.449	1.532	1.353	0.095	1.587	1.504	1.38	0.094	0.89	0.952	0.981	0.092	1.549	1.758	1.554	0.093	1.427	1.62	1.504	0.094	1.539	1.769	1.957	0.093	1.554	1.707	1.687	0.096	1.71	1.521	1.511	0.093	1.678	1.705	1.771
	19:45:12	37	1.46	1.525	1.75	0.094	1.258	1.388	1.283	0.094	1.194	0.776	0.991	0.094	1.45	1.542	1.343	0.095	1.591	1.518	1.363	0.094	0.888	0.941	1.051	0.092	1.554	1.76	1.561	0.093	1.425	1.639	1.502	0.094	1.597	1.816	1.97	0.093	1.563	1.718	1.698	0.096	1.728	1.523	1.511	0.093	1.689	1.708	1.772
	20:00:12	37	1.46	1.541	1.756	0.094	1.259	1.404	1.283	0.094	1.243	0.776	1.017	0.094	1.45	1.552	1.343	0.095	1.592	1.532	1.382	0.094	0.888	0.942	1.153	0.092	1.56	1.761	1.568	0.093	1.423	1.653	1.498	0.094	1.652	1.852	1.98	0.093	1.573	1.728	1.708	0.096	1.745	1.527	1.509	0.093	1.7	1.712	1.772
	20:15:12	37	1.459	1.553	1.762	0.094	1.259	1.429	1.283	0.094	1.297	0.777	1.048	0.094	1.45	1.563	1.366	0.095	1.588	1.544	1.453	0.094	0.885	0.981	1.234	0.092	1.566	1.763	1.574	0.093	1.417	1.665	1.502	0.094	1.701	1.881	1.989	0.093	1.583	1.736	1.716	0.096	1.761	1.533	1.51	0.092	1.71	1.715	1.772
	20:30:12	37	1.459	1.566	1.768	0.094	1.26	1.459	1.283	0.094	1.351	0.777	1.084	0.094	1.45	1.575	1.405	0.095	1.58	1.55	1.513	0.094	0.88	1.051	1.255	0.092	1.573	1.763	1.579	0.093	1.406	1.675	1.514	0.094	1.744	1.902	1.998	0.093	1.591	1.745	1.725	0.096	1.775	1.54	1.51	0.093	1.72	1.716	1.771
	20:45:12	37	1.459	1.577	1.773	0.094	1.259	1.486	1.284	0.094	1.405	0.776	1.126	0.094	1.45	1.585	1.444	0.095	1.568	1.564	1.526	0.094	0.868	1.134	1.269	0.092	1.581	1.764	1.584	0.093	1.39	1.675	1.529	0.094	1.786	1.923	2.005	0.093	1.6	1.753	1.732	0.096	1.787	1.55	1.51	0.093	1.729	1.718	1.771
	21:00:12	37	1.458	1.585	1.779	0.094	1.259	1.509	1.283	0.094	1.455	0.771	1.171	0.094	1.45	1.595	1.465	0.095	1.556	1.575	1.525	0.094	0.868	1.217	1.292	0.092	1.587	1.765	1.589	0.093	1.383	1.666	1.546	0.094	1.822	1.953	2.011	0.093	1.606	1.761	1.739	0.096	1.799	1.559	1.51	0.092	1.737	1.718	1.77
	21:15:12	37	1.456	1.594	1.784	0.094	1.259	1.526	1.284	0.094	1.504	0.764	1.219	0.094	1.45	1.605	1.463	0.095	1.544	1.582	1.534	0.094	0.905	1.292	1.318	0.092	1.593	1.766	1.594	0.093	1.403	1.647	1.565	0.094	1.858	1.966	2.018	0.093	1.613	1.767	1.745	0.096	1.809	1.57	1.509	0.092	1.745	1.721	1.768
	21:30:12	37	1.454	1.604	1.79	0.094	1.259	1.537	1.284	0.095	1.552	0.789	1.27	0.094	1.45	1.613	1.457	0.095	1.532	1.591	1.548	0.094	0.99	1.347	1.351	0.092	1.599	1.767	1.599	0.093	1.44	1.624	1.582	0.094	1.897	1.982	2.03	0.093	1.618	1.774	1.752	0.096	1.818	1.58	1.509	0.093	1.75	1.72	1.767
	21:45:12	37	1.45	1.611	1.794	0.094	1.259	1.543	1.283	0.094	1.598	0.859	1.322	0.094	1.45	1.621	1.456	0.095	1.517	1.583	1.564	0.094	1.095	1.4	1.388	0.092	1.604	1.768	1.603	0.093	1.473	1.607	1.599	0.094	1.913	1.995	2.037	0.093	1.624	1.78	1.758	0.096	1.827	1.589	1.508	0.093	1.756	1.718	1.766
	22:00:12	37	1.44	1.617	1.797	0.094	1.259	1.546	1.281	0.094	1.64	0.939	1.374	0.094	1.451	1.628	1.456	0.095	1.502	1.579	1.582	0.094	1.19	1.449	1.433	0.092	1.609	1.768	1.606	0.093	1.493	1.591	1.613	0.094	1.924	2.005	2.043	0.093	1.629	1.785	1.764	0.096	1.834	1.597	1.509	0.093	1.761	1.719	1.764
	22:15:12	37	1.429	1.625	1.799	0.094	1.258	1.544	1.28	0.094	1.681	1.008	1.425	0.094	1.45	1.635	1.457	0.095	1.488	1.574	1.6	0.094	1.26	1.493	1.483	0.092	1.614	1.769	1.61	0.093	1.505	1.577	1.622	0.094	1.936	2.019	2.048	0.093	1.633	1.789	1.769	0.096	1.841	1.605	1.508	0.093	1.765	1.717	1.763
	22:30:12	37	1.437	1.63	1.801	0.094	1.258	1.538	1.272	0.094	1.724	1.056	1.474	0.094	1.45	1.641	1.46	0.095	1.473	1.567	1.619	0.094	1.314	1.536	1.537	0.091	1.618	1.77	1.613	0.093	1.514	1.567	1.621	0.094	1.946	2.03	2.054	0.093	1.636	1.794	1.775	0.096	1.847	1.613	1.507	0.092	1.769	1.714	1.761
	22:45:12	37	1.46	1.636	1.805	0.094	1.256	1.535	1.26	0.094	1.758	1.088	1.523	0.094	1.45	1.645	1.463	0.095	1.457	1.561	1.637	0.094	1.366	1.589	1.598	0.092	1.622	1.77	1.616	0.093	1.52	1.557	1.613	0.094	1.954	2.042	2.057	0.093	1.639	1.798	1.781	0.096	1.853	1.62	1.506	0.093	1.771	1.713	1.761
	23:00:12	37	1.486	1.64	1.806	0.094	1.249	1.532	1.253	0.094	1.786	1.122	1.568	0.094	1.45	1.65	1.465	0.095	1.443	1.558	1.653	0.094	1.419	1.641	1.652	0.091	1.625	1.771	1.619	0.093	1.526	1.547	1.603	0.094	1.957	2.049	2.057	0.093	1.642	1.803	1.786	0.096	1.858	1.626	1.503	0.092	1.774	1.712	1.759
	23:15:12	37	1.503	1.644	1.808	0.094	1.233	1.524	1.276	0.094	1.804	1.16	1.611	0.094	1.45	1.655	1.468	0.095	1.431	1.567	1.663	0.094	1.474	1.686	1.696	0.092	1.627	1.772	1.622	0.093	1.523	1.538	1.594	0.094	1.966	2.057	2.059	0.093	1.644	1.807	1.792	0.096	1.861	1.632	1.5	0.093	1.776	1.71	1.757
	23:30:12	37	1.508	1.647	1.809	0.094	1.232	1.516	1.323	0.094	1.821	1.201	1.651	0.094	1.449	1.658	1.472	0.095	1.423	1.566	1.656	0.094	1.532	1.726	1.736	0.092	1.631	1.772	1.624	0.093	1.523	1.528	1.586	0.094	1.982	2.065	2.062	0.093	1.646	1.811	1.796	0.096	1.862	1.639	1.495	0.093	1.779	1.71	1.756
	23:45:12	37	1.505	1.651	1.809	0.094	1.271	1.506	1.365	0.094	1.841	1.244	1.686	0.094	1.449	1.66	1.474	0.095	1.417	1.56	1.629	0.094	1.588	1.764	1.773	0.092	1.633	1.772	1.627	0.093	1.52	1.525	1.578	0.094	1.992	2.075	2.065	0.093	1.649	1.815	1.801	0.096	1.865	1.643	1.489	0.093	1.781	1.707	1.755
	1 day, 0:00:12	37	1.501	1.65	1.81	0.094	1.337	1.496	1.391	0.094	1.863	1.289	1.722	0.094	1.448	1.663	1.477	0.095	1.412	1.55	1.613	0.094	1.639	1.807	1.803	0.092	1.636	1.773	1.629	0.093	1.518	1.526	1.57	0.094	2.009	2.084	2.063	0.093	1.65	1.819	1.806	0.096	1.868	1.647	1.484	0.093	1.782	1.707	1.754
	1 day, 0:15:12	37.1	1.499	1.655	1.809	0.094	1.397	1.485	1.405	0.094	1.878	1.338	1.754	0.094	1.446	1.665	1.479	0.095	1.409	1.538	1.598	0.094	1.691	1.845	1.832	0.092	1.638	1.772	1.632	0.093	1.516	1.524	1.56	0.094	2.015	2.091	2.062	0.093	1.652	1.823	1.81	0.096	1.871	1.651	1.478	0.093	1.784	1.706	1.753
	1 day, 0:30:12	37	1.497	1.657	1.809	0.094	1.435	1.474	1.418	0.094	1.889	1.385	1.782	0.094	1.444	1.668	1.48	0.095	1.407	1.527	1.584	0.094	1.74	1.883	1.855	0.092	1.64	1.772	1.634	0.093	1.515	1.52	1.551	0.094	2.02	2.098	2.06	0.093	1.653	1.827	1.814	0.096	1.874	1.653	1.477	0.093	1.785	1.706	1.751
	1 day, 0:45:12	37	1.497	1.658	1.81	0.094	1.46	1.465	1.44	0.094	1.901	1.433	1.807	0.094	1.439	1.671	1.483	0.095	1.406	1.52	1.572	0.094	1.787	1.913	1.875	0.092	1.642	1.773	1.635	0.093	1.512	1.52	1.541	0.094	2.031	2.104	2.054	0.093	1.655	1.831	1.818	0.096	1.877	1.657	1.482	0.093	1.786	1.706	1.75
	1 day, 1:00:12	37	1.498	1.661	1.81	0.094	1.486	1.46	1.464	0.094	1.911	1.479	1.822	0.094	1.433	1.673	1.484	0.095	1.405	1.515	1.565	0.094	1.83	1.942	1.891	0.092	1.644	1.773	1.638	0.093	1.51	1.518	1.532	0.094	2.036	2.111	2.047	0.093	1.656	1.834	1.822	0.096	1.88	1.66	1.489	0.093	1.787	1.704	1.749
	1 day, 1:15:12	36.9	1.498	1.663	1.81	0.094	1.511	1.456	1.481	0.094	1.92	1.522	1.833	0.094	1.428	1.675	1.487	0.095	1.405	1.511	1.561	0.094	1.871	1.97	1.89	0.092	1.646	1.773	1.64	0.093	1.509	1.515	1.527	0.094	2.045	2.114	2.042	0.093	1.658	1.838	1.825	0.096	1.882	1.663	1.5	0.092	1.788	1.705	1.748
	1 day, 1:30:12	37	1.499	1.666	1.81	0.094	1.529	1.454	1.5	0.094	1.926	1.56	1.846	0.094	1.427	1.678	1.489	0.095	1.404	1.509	1.557	0.094	1.906	1.998	1.887	0.092	1.648	1.773	1.642	0.093	1.507	1.513	1.523	0.094	2.051	2.115	2.04	0.093	1.659	1.841	1.829	0.096	1.885	1.666	1.513	0.093	1.79	1.706	1.747
	1 day, 1:45:12	37	1.499	1.668	1.81	0.094	1.541	1.452	1.51	0.094	1.934	1.604	1.874	0.094	1.433	1.68	1.491	0.095	1.403	1.507	1.548	0.094	1.942	2.016	1.897	0.092	1.651	1.773	1.643	0.093	1.504	1.511	1.524	0.094	2.056	2.12	2.038	0.093	1.66	1.844	1.832	0.096	1.887	1.669	1.526	0.093	1.79	1.705	1.745
	1 day, 2:00:12	37	1.501	1.67	1.809	0.094	1.547	1.452	1.519	0.094	1.94	1.65	1.889	0.094	1.445	1.683	1.493	0.095	1.401	1.504	1.538	0.094	1.968	2.032	1.903	0.092	1.652	1.772	1.644	0.093	1.512	1.511	1.528	0.094	2.07	2.124	2.034	0.093	1.661	1.847	1.836	0.096	1.89	1.671	1.538	0.093	1.791	1.705	1.744
	1 day, 2:15:12	37	1.502	1.671	1.809	0.094	1.548	1.454	1.522	0.094	1.948	1.689	1.894	0.094	1.461	1.685	1.495	0.095	1.4	1.503	1.531	0.094	1.988	2.047	1.908	0.092	1.654	1.773	1.646	0.093	1.51	1.51	1.528	0.094	2.084	2.128	2.033	0.093	1.662	1.85	1.838	0.096	1.891	1.674	1.55	0.093	1.792	1.704	1.743
	1 day, 2:30:12	37	1.503	1.673	1.809	0.094	1.547	1.455	1.525	0.094	1.955	1.715	1.9	0.094	1.478	1.688	1.498	0.095	1.4	1.501	1.527	0.094	2.009	2.059	1.909	0.091	1.655	1.772	1.647	0.093	1.512	1.509	1.528	0.094	2.094	2.134	2.029	0.093	1.663	1.853	1.841	0.096	1.894	1.677	1.56	0.093	1.793	1.704	1.742
	1 day, 2:45:12	37	1.504	1.674	1.808	0.094	1.543	1.456	1.521	0.094	1.96	1.742	1.907	0.094	1.494	1.689	1.5	0.095	1.399	1.502	1.526	0.094	2.025	2.065	1.91	0.092	1.657	1.772	1.648	0.093	1.516	1.509	1.527	0.094	2.1	2.136	2.026	0.093	1.664	1.856	1.844	0.096	1.896	1.679	1.569	0.093	1.793	1.703	1.741
	1 day, 3:00:12	37	1.505	1.673	1.808	0.094	1.534	1.457	1.508	0.094	1.967	1.764	1.917	0.094	1.506	1.692	1.503	0.095	1.397	1.501	1.525	0.094	2.041	2.067	1.899	0.092	1.658	1.772	1.649	0.093	1.513	1.51	1.526	0.094	2.11	2.137	2.025	0.093	1.665	1.859	1.845	0.096	1.898	1.682	1.575	0.093	1.795	1.703	1.74
	1 day, 3:15:12	37.1	1.505	1.674	1.807	0.094	1.524	1.458	1.494	0.094	1.972	1.785	1.923	0.094	1.514	1.693	1.505	0.095	1.401	1.5	1.524	0.094	2.05	2.051	1.892	0.092	1.659	1.772	1.651	0.093	1.51	1.51	1.525	0.094	2.108	2.137	2.022	0.093	1.666	1.861	1.847	0.096	1.9	1.685	1.581	0.093	1.795	1.702	1.74
	1 day, 3:30:12	37	1.506	1.679	1.807	0.094	1.517	1.459	1.481	0.094	1.974	1.805	1.932	0.094	1.517	1.695	1.507	0.095	1.397	1.5	1.522	0.094	2.057	2.009	1.894	0.091	1.66	1.771	1.651	0.093	1.506	1.51	1.525	0.094	2.111	2.138	2.017	0.093	1.668	1.863	1.848	0.096	1.901	1.689	1.585	0.093	1.795	1.703	1.738
	1 day, 3:45:12	37	1.508	1.677	1.806	0.094	1.509	1.46	1.471	0.094	1.976	1.816	1.937	0.094	1.518	1.698	1.509	0.095	1.404	1.499	1.522	0.094	2.062	1.989	1.893	0.092	1.662	1.772	1.653	0.093	1.505	1.512	1.525	0.094	2.114	2.138	2.016	0.093	1.669	1.866	1.849	0.096	1.903	1.692	1.588	0.093	1.796	1.704	1.737
	1 day, 4:00:12	37	1.509	1.68	1.805	0.094	1.5	1.46	1.462	0.094	1.977	1.83	1.94	0.094	1.518	1.699	1.512	0.095	1.402	1.5	1.52	0.094	2.059	1.974	1.892	0.092	1.662	1.77	1.654	0.093	1.502	1.512	1.525	0.094	2.122	2.133	2.012	0.093	1.669	1.868	1.849	0.096	1.904	1.694	1.59	0.093	1.795	1.704	1.737
	1 day, 4:15:12	37.1	1.509	1.682	1.804	0.094	1.491	1.46	1.457	0.094	1.977	1.843	1.942	0.094	1.517	1.701	1.514	0.095	1.406	1.5	1.521	0.094	2.05	1.966	1.891	0.092	1.663	1.771	1.654	0.093	1.5	1.514	1.525	0.094	2.131	2.132	2.007	0.093	1.669	1.871	1.853	0.096	1.905	1.699	1.591	0.093	1.797	1.702	1.736
	1 day, 4:30:12	37	1.51	1.683	1.804	0.094	1.484	1.461	1.452	0.094	1.979	1.847	1.944	0.094	1.516	1.702	1.518	0.095	1.411	1.498	1.521	0.094	2.042	1.946	1.889	0.092	1.664	1.77	1.655	0.093	1.498	1.515	1.525	0.094	2.126	2.131	2.006	0.093	1.67	1.873	1.853	0.096	1.907	1.702	1.592	0.093	1.798	1.703	1.734
	1 day, 4:45:12	37	1.511	1.682	1.803	0.094	1.475	1.462	1.446	0.094	1.979	1.85	1.946	0.094	1.515	1.703	1.52	0.095	1.415	1.498	1.522	0.094	2.034	1.927	1.886	0.092	1.665	1.77	1.655	0.093	1.497	1.517	1.525	0.094	2.117	2.128	2.008	0.093	1.67	1.875	1.854	0.096	1.908	1.703	1.593	0.093	1.798	1.701	1.733
	1 day, 5:00:12	37	1.511	1.685	1.802	0.094	1.467	1.462	1.441	0.094	1.979	1.858	1.947	0.094	1.515	1.705	1.522	0.095	1.418	1.496	1.524	0.094	2.027	1.899	1.884	0.092	1.665	1.769	1.656	0.093	1.497	1.52	1.525	0.094	2.116	2.125	2.003	0.093	1.671	1.878	1.855	0.096	1.909	1.705	1.594	0.093	1.798	1.702	1.733
	1 day, 5:15:12	37	1.512	1.682	1.801	0.094	1.463	1.464	1.436	0.094	1.977	1.862	1.949	0.094	1.515	1.706	1.524	0.095	1.422	1.497	1.524	0.094	2.016	1.885	1.881	0.092	1.666	1.769	1.657	0.093	1.497	1.521	1.524	0.094	2.116	2.119	1.998	0.093	1.671	1.88	1.854	0.096	1.91	1.707	1.594	0.093	1.798	1.702	1.731
	1 day, 5:30:12	37	1.513	1.686	1.8	0.094	1.461	1.466	1.435	0.094	1.977	1.862	1.95	0.094	1.515	1.708	1.527	0.095	1.425	1.497	1.525	0.094	2	1.886	1.879	0.092	1.666	1.768	1.657	0.093	1.497	1.524	1.523	0.094	2.114	2.113	1.993	0.093	1.672	1.881	1.851	0.096	1.91	1.708	1.594	0.093	1.798	1.7	1.731
	1 day, 5:45:12	37	1.513	1.688	1.8	0.094	1.459	1.467	1.436	0.095	1.976	1.864	1.951	0.094	1.516	1.708	1.529	0.095	1.429	1.499	1.525	0.094	1.982	1.876	1.878	0.092	1.667	1.767	1.658	0.093	1.497	1.527	1.524	0.094	2.111	2.104	1.988	0.093	1.672	1.88	1.85	0.096	1.911	1.71	1.595	0.093	1.798	1.7	1.73
	1 day, 6:00:12	37.1	1.513	1.689	1.799	0.094	1.457	1.468	1.437	0.094	1.975	1.865	1.953	0.094	1.517	1.71	1.532	0.095	1.431	1.499	1.524	0.094	1.964	1.868	1.876	0.092	1.667	1.766	1.658	0.093	1.497	1.531	1.523	0.094	2.111	2.095	1.982	0.093	1.673	1.877	1.85	0.096	1.911	1.712	1.595	0.093	1.798	1.701	1.729
	1 day, 6:15:12	37	1.514	1.689	1.798	0.094	1.457	1.471	1.436	0.094	1.974	1.866	1.953	0.094	1.518	1.711	1.535	0.095	1.435	1.501	1.524	0.094	1.946	1.859	1.874	0.092	1.667	1.766	1.659	0.093	1.498	1.535	1.524	0.094	2.11	2.084	1.978	0.093	1.672	1.876	1.853	0.096	1.911	1.714	1.595	0.093	1.799	1.7	1.728
	1 day, 6:30:12	37	1.514	1.689	1.797	0.094	1.454	1.473	1.437	0.094	1.974	1.866	1.953	0.094	1.518	1.712	1.537	0.095	1.439	1.506	1.524	0.094	1.938	1.786	1.872	0.092	1.667	1.765	1.659	0.093	1.498	1.538	1.523	0.094	2.101	2.073	1.976	0.093	1.673	1.877	1.853	0.096	1.91	1.715	1.595	0.093	1.798	1.701	1.727
	1 day, 6:45:12	37	1.514	1.689	1.797	0.094	1.454	1.476	1.436	0.094	1.973	1.865	1.953	0.094	1.519	1.713	1.54	0.095	1.443	1.506	1.525	0.094	1.929	1.77	1.87	0.092	1.667	1.765	1.66	0.093	1.498	1.542	1.523	0.094	2.093	2.055	1.976	0.093	1.673	1.877	1.854	0.096	1.911	1.716	1.595	0.093	1.799	1.701	1.726
	1 day, 7:00:12	37	1.515	1.69	1.796	0.094	1.454	1.478	1.438	0.094	1.972	1.862	1.952	0.094	1.52	1.714	1.542	0.095	1.446	1.509	1.526	0.094	1.914	1.768	1.868	0.092	1.668	1.764	1.66	0.093	1.5	1.544	1.525	0.094	2.086	2.04	1.977	0.093	1.673	1.875	1.854	0.096	1.91	1.717	1.595	0.093	1.798	1.7	1.726
	1 day, 7:15:12	36.9	1.515	1.691	1.796	0.094	1.453	1.479	1.439	0.094	1.971	1.862	1.951	0.094	1.521	1.714	1.543	0.095	1.448	1.512	1.527	0.094	1.9	1.757	1.866	0.092	1.668	1.764	1.661	0.093	1.5	1.545	1.523	0.094	2.077	2.03	1.979	0.093	1.673	1.873	1.853	0.096	1.909	1.719	1.597	0.093	1.799	1.701	1.724
	1 day, 7:30:12	37	1.515	1.692	1.794	0.094	1.453	1.482	1.441	0.094	1.97	1.861	1.948	0.094	1.522	1.715	1.546	0.095	1.451	1.519	1.528	0.094	1.888	1.756	1.864	0.092	1.668	1.763	1.66	0.093	1.501	1.549	1.524	0.094	2.069	2.023	1.985	0.093	1.673	1.872	1.853	0.096	1.909	1.72	1.597	0.093	1.798	1.699	1.724
	1 day, 7:45:12	37	1.516	1.691	1.794	0.094	1.453	1.485	1.442	0.094	1.96	1.86	1.946	0.094	1.524	1.716	1.548	0.095	1.455	1.519	1.531	0.094	1.88	1.756	1.861	0.092	1.668	1.763	1.661	0.093	1.503	1.552	1.524	0.094	2.064	2.023	1.986	0.093	1.673	1.869	1.852	0.096	1.908	1.721	1.597	0.093	1.798	1.701	1.722
	1 day, 8:00:12	36.9	1.516	1.692	1.792	0.094	1.453	1.486	1.443	0.094	1.931	1.859	1.944	0.094	1.524	1.716	1.55	0.095	1.458	1.521	1.536	0.094	1.869	1.743	1.861	0.091	1.668	1.762	1.661	0.093	1.502	1.554	1.526	0.094	2.055	2.02	1.988	0.093	1.673	1.868	1.851	0.096	1.907	1.722	1.597	0.093	1.798	1.699	1.722
	1 day, 8:15:12	37.1	1.517	1.693	1.792	0.094	1.454	1.49	1.443	0.094	1.922	1.858	1.942	0.094	1.526	1.717	1.552	0.095	1.457	1.525	1.541	0.094	1.859	1.706	1.859	0.092	1.669	1.761	1.661	0.093	1.503	1.556	1.526	0.094	2.045	2.011	1.986	0.093	1.673	1.866	1.851	0.096	1.907	1.723	1.599	0.093	1.798	1.7	1.72
	1 day, 8:30:12	37	1.518	1.692	1.792	0.094	1.454	1.494	1.445	0.094	1.916	1.858	1.939	0.094	1.526	1.718	1.554	0.095	1.46	1.532	1.543	0.094	1.847	1.637	1.858	0.092	1.669	1.76	1.662	0.093	1.504	1.565	1.526	0.094	2.035	2.004	1.987	0.093	1.673	1.865	1.851	0.096	1.906	1.724	1.599	0.093	1.798	1.699	1.719
	1 day, 8:45:12	37	1.518	1.692	1.791	0.094	1.456	1.498	1.445	0.094	1.906	1.856	1.936	0.094	1.527	1.718	1.555	0.095	1.464	1.536	1.546	0.094	1.835	1.605	1.856	0.092	1.669	1.759	1.661	0.093	1.503	1.567	1.53	0.094	2.025	1.998	1.987	0.093	1.673	1.863	1.849	0.096	1.905	1.725	1.599	0.093	1.797	1.698	1.718
	1 day, 9:00:12	37	1.518	1.692	1.79	0.094	1.459	1.499	1.446	0.094	1.902	1.855	1.929	0.094	1.528	1.718	1.557	0.095	1.468	1.542	1.557	0.094	1.816	1.577	1.855	0.092	1.669	1.758	1.662	0.093	1.504	1.569	1.532	0.094	2.021	1.993	1.986	0.093	1.673	1.861	1.85	0.096	1.905	1.726	1.601	0.093	1.797	1.698	1.717
	1 day, 9:15:12	37	1.518	1.693	1.789	0.094	1.46	1.502	1.448	0.094	1.899	1.855	1.925	0.094	1.53	1.719	1.559	0.095	1.468	1.54	1.563	0.094	1.8	1.594	1.854	0.092	1.669	1.758	1.662	0.093	1.505	1.572	1.534	0.094	2.019	1.987	1.982	0.093	1.673	1.858	1.849	0.096	1.904	1.726	1.603	0.093	1.796	1.698	1.717
	1 day, 9:30:12	37	1.519	1.691	1.788	0.094	1.463	1.507	1.45	0.094	1.893	1.854	1.916	0.094	1.531	1.719	1.562	0.095	1.471	1.54	1.571	0.094	1.797	1.61	1.853	0.092	1.669	1.756	1.662	0.093	1.506	1.575	1.536	0.094	2.014	1.986	1.978	0.093	1.673	1.855	1.848	0.096	1.904	1.728	1.604	0.093	1.796	1.698	1.716
	1 day, 9:45:12	37	1.519	1.691	1.787	0.094	1.465	1.509	1.453	0.094	1.888	1.851	1.907	0.094	1.532	1.719	1.563	0.095	1.479	1.546	1.566	0.094	1.771	1.586	1.852	0.091	1.668	1.755	1.662	0.093	1.508	1.575	1.537	0.094	2.008	1.986	1.974	0.093	1.673	1.852	1.848	0.096	1.903	1.729	1.605	0.093	1.796	1.698	1.714
	1 day, 10:00:12	37	1.52	1.694	1.786	0.094	1.468	1.512	1.458	0.094	1.884	1.852	1.901	0.094	1.533	1.719	1.564	0.095	1.482	1.546	1.574	0.094	1.812	1.582	1.851	0.092	1.668	1.756	1.662	0.093	1.508	1.576	1.539	0.094	2.004	1.983	1.971	0.093	1.673	1.854	1.848	0.096	1.903	1.73	1.606	0.093	1.795	1.698	1.713
	1 day, 10:15:12	37	1.52	1.693	1.785	0.094	1.47	1.515	1.462	0.094	1.879	1.848	1.895	0.094	1.534	1.72	1.566	0.095	1.484	1.551	1.561	0.094	1.802	1.582	1.849	0.092	1.668	1.754	1.662	0.093	1.513	1.579	1.54	0.094	2.004	1.981	1.971	0.093	1.673	1.852	1.848	0.096	1.902	1.73	1.607	0.093	1.795	1.697	1.712
	1 day, 10:30:12	37	1.52	1.691	1.784	0.094	1.474	1.519	1.464	0.094	1.874	1.848	1.888	0.094	1.536	1.72	1.569	0.095	1.489	1.554	1.576	0.094	1.792	1.569	1.848	0.092	1.668	1.754	1.662	0.093	1.514	1.58	1.541	0.094	2.004	1.978	1.971	0.093	1.673	1.85	1.848	0.096	1.902	1.732	1.608	0.093	1.795	1.697	1.711
	1 day, 10:45:12	37	1.521	1.692	1.783	0.094	1.48	1.524	1.466	0.094	1.869	1.846	1.883	0.094	1.536	1.72	1.571	0.095	1.457	1.564	1.593	0.094	1.774	1.592	1.847	0.092	1.668	1.753	1.662	0.093	1.516	1.587	1.545	0.094	2.005	1.974	1.969	0.093	1.673	1.848	1.848	0.096	1.901	1.732	1.609	0.093	1.794	1.697	1.71
	1 day, 11:00:12	37	1.521	1.692	1.782	0.094	1.484	1.525	1.473	0.094	1.866	1.829	1.879	0.094	1.536	1.72	1.572	0.095	1.466	1.564	1.609	0.094	1.763	1.605	1.846	0.091	1.668	1.752	1.662	0.093	1.517	1.586	1.544	0.094	1.996	1.973	1.967	0.093	1.673	1.847	1.847	0.096	1.901	1.733	1.611	0.093	1.794	1.695	1.71
	1 day, 11:15:12	37	1.522	1.691	1.781	0.094	1.487	1.526	1.477	0.094	1.862	1.825	1.872	0.094	1.538	1.72	1.573	0.095	1.469	1.579	1.586	0.094	1.748	1.6	1.844	0.091	1.668	1.751	1.662	0.093	1.52	1.589	1.547	0.094	1.989	1.97	1.962	0.093	1.673	1.845	1.846	0.096	1.901	1.734	1.612	0.093	1.793	1.697	1.708
	1 day, 11:30:12	37	1.522	1.691	1.78	0.094	1.494	1.528	1.479	0.094	1.86	1.829	1.86	0.094	1.538	1.72	1.575	0.095	1.486	1.567	1.601	0.094	1.736	1.598	1.843	0.092	1.667	1.75	1.662	0.093	1.522	1.593	1.55	0.094	1.984	1.968	1.962	0.093	1.672	1.844	1.846	0.096	1.9	1.734	1.613	0.093	1.793	1.697	1.707
	1 day, 11:45:12	37	1.522	1.692	1.779	0.094	1.497	1.531	1.486	0.094	1.86	1.829	1.855	0.094	1.539	1.72	1.576	0.095	1.477	1.581	1.591	0.094	1.722	1.601	1.842	0.092	1.667	1.749	1.662	0.093	1.524	1.595	1.552	0.094	1.979	1.965	1.96	0.093	1.672	1.843	1.846	0.096	1.899	1.736	1.614	0.093	1.793	1.696	1.706
	1 day, 12:00:12	37	1.522	1.692	1.778	0.094	1.502	1.534	1.488	0.094	1.86	1.828	1.852	0.094	1.54	1.72	1.578	0.095	1.467	1.588	1.595	0.094	1.725	1.591	1.841	0.092	1.667	1.748	1.662	0.093	1.527	1.602	1.552	0.094	1.974	1.963	1.957	0.093	1.672	1.843	1.846	0.096	1.899	1.736	1.615	0.093	1.792	1.695	1.705
	1 day, 12:15:12	37	1.523	1.692	1.777	0.094	1.508	1.537	1.492	0.094	1.857	1.826	1.849	0.094	1.541	1.72	1.578	0.095	1.491	1.587	1.579	0.094	1.731	1.591	1.84	0.091	1.667	1.747	1.662	0.093	1.53	1.595	1.555	0.094	1.966	1.962	1.956	0.093	1.672	1.841	1.845	0.096	1.899	1.736	1.616	0.093	1.791	1.695	1.704
	1 day, 12:30:12	37	1.523	1.693	1.776	0.094	1.511	1.537	1.5	0.094	1.857	1.825	1.843	0.094	1.542	1.72	1.579	0.095	1.475	1.589	1.604	0.094	1.732	1.59	1.839	0.092	1.667	1.747	1.662	0.093	1.535	1.599	1.559	0.094	1.956	1.959	1.955	0.093	1.671	1.84	1.844	0.096	1.898	1.738	1.617	0.093	1.791	1.694	1.703
	1 day, 12:45:12	37	1.524	1.693	1.775	0.094	1.515	1.539	1.504	0.094	1.855	1.821	1.838	0.094	1.543	1.72	1.581	0.095	1.476	1.6	1.6	0.094	1.725	1.581	1.838	0.092	1.667	1.746	1.661	0.093	1.538	1.605	1.562	0.094	1.944	1.958	1.953	0.093	1.671	1.839	1.844	0.096	1.898	1.738	1.617	0.093	1.79	1.694	1.702
	1 day, 13:00:12	37	1.524	1.688	1.774	0.094	1.522	1.538	1.506	0.094	1.855	1.822	1.835	0.094	1.544	1.72	1.581	0.095	1.48	1.616	1.594	0.094	1.722	1.578	1.836	0.092	1.666	1.745	1.661	0.093	1.539	1.603	1.564	0.094	1.937	1.956	1.951	0.093	1.671	1.838	1.843	0.096	1.897	1.738	1.619	0.093	1.789	1.694	1.701
	1 day, 13:15:12	37	1.524	1.691	1.772	0.094	1.527	1.541	1.507	0.094	1.854	1.822	1.831	0.094	1.545	1.72	1.582	0.095	1.484	1.616	1.603	0.094	1.724	1.575	1.835	0.092	1.666	1.744	1.661	0.093	1.541	1.609	1.563	0.094	1.931	1.955	1.95	0.093	1.67	1.837	1.843	0.096	1.897	1.739	1.62	0.093	1.789	1.694	1.7
	1 day, 13:30:12	37	1.525	1.69	1.771	0.094	1.532	1.543	1.506	0.094	1.852	1.821	1.84	0.094	1.546	1.72	1.583	0.095	1.484	1.622	1.603	0.094	1.729	1.569	1.834	0.092	1.666	1.743	1.661	0.093	1.543	1.615	1.572	0.094	1.923	1.953	1.948	0.093	1.67	1.836	1.842	0.096	1.896	1.739	1.621	0.093	1.789	1.694	1.698
	1 day, 13:45:12	37	1.524	1.692	1.77	0.094	1.535	1.546	1.506	0.094	1.851	1.82	1.856	0.094	1.546	1.72	1.584	0.095	1.476	1.621	1.571	0.094	1.729	1.569	1.832	0.092	1.665	1.742	1.661	0.093	1.544	1.608	1.573	0.094	1.91	1.952	1.947	0.093	1.67	1.835	1.841	0.096	1.896	1.74	1.621	0.093	1.788	1.695	1.698
	1 day, 14:00:12	37	1.525	1.69	1.769	0.094	1.54	1.546	1.506	0.094	1.849	1.819	1.856	0.094	1.547	1.719	1.585	0.095	1.481	1.634	1.572	0.094	1.724	1.564	1.831	0.092	1.665	1.741	1.661	0.093	1.555	1.602	1.574	0.094	1.898	1.951	1.946	0.093	1.669	1.834	1.841	0.096	1.896	1.74	1.623	0.093	1.787	1.694	1.697
	1 day, 14:15:12	37	1.525	1.688	1.768	0.094	1.544	1.551	1.508	0.094	1.847	1.817	1.854	0.094	1.548	1.719	1.586	0.095	1.473	1.64	1.588	0.094	1.722	1.557	1.829	0.092	1.664	1.74	1.661	0.093	1.558	1.601	1.58	0.094	1.889	1.949	1.944	0.093	1.669	1.833	1.84	0.096	1.895	1.741	1.625	0.093	1.787	1.694	1.696
	1 day, 14:30:12	37	1.525	1.687	1.767	0.094	1.55	1.55	1.517	0.094	1.844	1.814	1.852	0.094	1.548	1.718	1.587	0.095	1.477	1.641	1.596	0.094	1.724	1.554	1.828	0.091	1.664	1.739	1.66	0.093	1.568	1.622	1.555	0.094	1.888	1.948	1.943	0.093	1.669	1.833	1.839	0.096	1.895	1.741	1.625	0.093	1.786	1.694	1.694
	1 day, 14:45:12	37	1.526	1.689	1.766	0.094	1.554	1.555	1.532	0.094	1.842	1.815	1.853	0.094	1.55	1.718	1.588	0.095	1.478	1.647	1.587	0.094	1.722	1.55	1.827	0.092	1.664	1.738	1.661	0.093	1.546	1.627	1.569	0.094	1.893	1.947	1.942	0.093	1.668	1.832	1.838	0.096	1.894	1.742	1.627	0.093	1.786	1.694	1.694
	1 day, 15:00:12	37	1.527	1.688	1.765	0.094	1.556	1.556	1.532	0.094	1.84	1.808	1.849	0.094	1.55	1.718	1.59	0.094	1.479	1.647	1.568	0.094	1.718	1.547	1.826	0.092	1.663	1.737	1.66	0.093	1.547	1.6	1.561	0.094	1.879	1.945	1.941	0.093	1.668	1.831	1.837	0.096	1.894	1.742	1.627	0.093	1.784	1.692	1.693
	1 day, 15:15:12	37	1.527	1.686	1.764	0.094	1.559	1.555	1.535	0.094	1.838	1.803	1.849	0.094	1.551	1.718	1.59	0.095	1.49	1.657	1.595	0.094	1.705	1.545	1.825	0.092	1.663	1.736	1.661	0.093	1.56	1.63	1.561	0.094	1.873	1.942	1.939	0.093	1.667	1.83	1.837	0.096	1.893	1.742	1.628	0.093	1.784	1.692	1.692
	1 day, 15:30:12	37	1.527	1.688	1.763	0.094	1.566	1.559	1.544	0.094	1.835	1.8	1.845	0.094	1.552	1.717	1.591	0.094	1.472	1.661	1.578	0.094	1.69	1.537	1.824	0.091	1.662	1.735	1.66	0.093	1.563	1.639	1.568	0.094	1.869	1.941	1.938	0.093	1.667	1.829	1.837	0.095	1.893	1.743	1.629	0.093	1.783	1.692	1.691
	1 day, 15:45:12	37	1.528	1.686	1.761	0.094	1.57	1.532	1.541	0.094	1.833	1.799	1.844	0.094	1.553	1.717	1.591	0.095	1.483	1.661	1.577	0.094	1.669	1.54	1.823	0.092	1.662	1.734	1.66	0.093	1.557	1.607	1.573	0.094	1.867	1.94	1.937	0.093	1.667	1.829	1.836	0.096	1.893	1.743	1.63	0.093	1.783	1.691	1.689
	1 day, 16:00:12	37	1.528	1.688	1.76	0.094	1.577	1.534	1.543	0.094	1.83	1.794	1.842	0.094	1.554	1.716	1.592	0.095	1.464	1.662	1.567	0.094	1.656	1.54	1.822	0.092	1.662	1.733	1.66	0.093	1.568	1.636	1.571	0.094	1.862	1.938	1.935	0.093	1.666	1.827	1.835	0.095	1.892	1.744	1.631	0.093	1.782	1.691	1.689
	1 day, 16:15:12	37	1.528	1.687	1.759	0.094	1.581	1.53	1.549	0.094	1.827	1.793	1.849	0.094	1.554	1.717	1.593	0.094	1.477	1.661	1.57	0.094	1.642	1.542	1.821	0.091	1.661	1.731	1.66	0.093	1.562	1.636	1.564	0.094	1.86	1.936	1.934	0.093	1.665	1.826	1.834	0.095	1.891	1.744	1.631	0.093	1.782	1.691	1.687
	1 day, 16:30:12	37	1.529	1.686	1.758	0.094	1.585	1.535	1.55	0.094	1.825	1.791	1.847	0.094	1.555	1.716	1.593	0.095	1.473	1.667	1.567	0.094	1.627	1.545	1.82	0.092	1.661	1.731	1.66	0.093	1.571	1.636	1.562	0.094	1.859	1.934	1.932	0.093	1.666	1.826	1.834	0.096	1.891	1.745	1.632	0.093	1.78	1.69	1.687
	1 day, 16:45:12	37	1.529	1.685	1.757	0.094	1.589	1.546	1.557	0.094	1.821	1.788	1.844	0.094	1.556	1.716	1.594	0.095	1.48	1.675	1.587	0.094	1.601	1.537	1.819	0.092	1.66	1.729	1.66	0.093	1.571	1.616	1.592	0.094	1.856	1.93	1.931	0.093	1.665	1.825	1.833	0.096	1.891	1.744	1.632	0.093	1.78	1.688	1.686
	1 day, 17:00:12	37	1.529	1.685	1.756	0.094	1.591	1.533	1.556	0.094	1.819	1.786	1.844	0.094	1.557	1.716	1.595	0.095	1.486	1.666	1.568	0.094	1.578	1.541	1.819	0.092	1.66	1.728	1.659	0.093	1.589	1.63	1.584	0.094	1.854	1.929	1.929	0.093	1.665	1.824	1.832	0.096	1.89	1.745	1.634	0.093	1.78	1.69	1.685
	1 day, 17:15:12	37	1.53	1.686	1.755	0.094	1.598	1.543	1.564	0.094	1.817	1.784	1.842	0.094	1.557	1.715	1.595	0.095	1.476	1.665	1.568	0.094	1.563	1.544	1.818	0.091	1.659	1.727	1.659	0.093	1.553	1.593	1.581	0.094	1.851	1.927	1.928	0.093	1.664	1.823	1.831	0.095	1.89	1.745	1.634	0.093	1.779	1.689	1.683
	1 day, 17:30:12	37.1	1.53	1.685	1.753	0.094	1.598	1.54	1.565	0.094	1.815	1.781	1.841	0.094	1.558	1.714	1.596	0.095	1.49	1.658	1.584	0.094	1.552	1.543	1.817	0.092	1.659	1.725	1.659	0.093	1.562	1.592	1.573	0.094	1.848	1.926	1.927	0.093	1.664	1.822	1.831	0.096	1.889	1.745	1.635	0.093	1.779	1.688	1.683
	1 day, 17:45:12	37	1.53	1.683	1.753	0.094	1.605	1.544	1.572	0.094	1.813	1.777	1.841	0.094	1.559	1.714	1.596	0.095	1.472	1.659	1.564	0.094	1.533	1.55	1.816	0.091	1.659	1.724	1.659	0.093	1.572	1.651	1.579	0.094	1.845	1.926	1.925	0.093	1.663	1.821	1.83	0.095	1.888	1.745	1.636	0.093	1.778	1.688	1.683
	1 day, 18:00:12	37	1.531	1.681	1.752	0.094	1.605	1.545	1.577	0.094	1.811	1.774	1.84	0.094	1.56	1.713	1.596	0.095	1.48	1.659	1.567	0.094	1.512	1.561	1.815	0.091	1.658	1.723	1.658	0.093	1.569	1.604	1.578	0.094	1.843	1.925	1.924	0.093	1.663	1.82	1.83	0.096	1.888	1.745	1.636	0.093	1.777	1.688	1.682
	1 day, 18:15:12	37	1.532	1.683	1.751	0.094	1.609	1.552	1.566	0.094	1.81	1.774	1.839	0.094	1.56	1.713	1.597	0.095	1.475	1.673	1.566	0.094	1.503	1.552	1.815	0.092	1.658	1.721	1.658	0.093	1.635	1.644	1.581	0.094	1.841	1.923	1.922	0.093	1.662	1.819	1.829	0.095	1.888	1.745	1.637	0.093	1.776	1.687	1.681
	1 day, 18:30:12	37	1.532	1.683	1.749	0.094	1.612	1.534	1.561	0.094	1.807	1.772	1.838	0.094	1.561	1.712	1.597	0.094	1.474	1.668	1.572	0.094	1.495	1.555	1.813	0.091	1.657	1.72	1.657	0.093	1.538	1.647	1.595	0.094	1.839	1.922	1.921	0.093	1.662	1.818	1.827	0.095	1.887	1.746	1.637	0.093	1.776	1.687	1.68
	1 day, 18:45:12	37	1.533	1.683	1.748	0.094	1.614	1.547	1.583	0.094	1.806	1.773	1.838	0.094	1.561	1.711	1.598	0.094	1.473	1.665	1.561	0.094	1.487	1.56	1.813	0.091	1.657	1.719	1.657	0.093	1.579	1.623	1.56	0.094	1.837	1.923	1.92	0.093	1.661	1.817	1.826	0.096	1.886	1.746	1.638	0.093	1.775	1.687	1.679
	1 day, 19:00:12	37	1.533	1.681	1.748	0.094	1.62	1.545	1.584	0.094	1.804	1.774	1.837	0.094	1.562	1.71	1.598	0.095	1.491	1.663	1.562	0.094	1.482	1.555	1.812	0.092	1.657	1.718	1.657	0.093	1.567	1.636	1.568	0.094	1.836	1.922	1.918	0.093	1.661	1.816	1.825	0.096	1.886	1.746	1.638	0.093	1.775	1.686	1.678
	1 day, 19:15:12	37	1.533	1.679	1.746	0.094	1.618	1.544	1.599	0.094	1.803	1.772	1.835	0.094	1.562	1.71	1.598	0.094	1.488	1.667	1.56	0.094	1.478	1.556	1.811	0.091	1.656	1.716	1.657	0.093	1.57	1.618	1.56	0.094	1.834	1.921	1.917	0.093	1.661	1.816	1.824	0.096	1.885	1.746	1.637	0.093	1.774	1.686	1.677
	1 day, 19:30:12	37	1.534	1.68	1.745	0.094	1.626	1.542	1.597	0.094	1.801	1.768	1.834	0.094	1.563	1.709	1.599	0.094	1.5	1.625	1.603	0.094	1.476	1.56	1.81	0.092	1.656	1.715	1.656	0.093	1.605	1.679	1.576	0.094	1.832	1.92	1.915	0.093	1.66	1.815	1.823	0.096	1.885	1.746	1.639	0.093	1.774	1.685	1.677
	1 day, 19:45:12	37.1	1.534	1.681	1.744	0.094	1.623	1.548	1.602	0.094	1.8	1.768	1.834	0.094	1.563	1.709	1.599	0.095	1.478	1.681	1.571	0.094	1.471	1.551	1.81	0.092	1.655	1.714	1.657	0.093	1.598	1.618	1.571	0.094	1.83	1.92	1.915	0.093	1.659	1.814	1.822	0.095	1.884	1.746	1.639	0.093	1.773	1.685	1.676
	1 day, 20:00:12	37	1.535	1.679	1.744	0.094	1.63	1.545	1.604	0.094	1.799	1.77	1.833	0.094	1.564	1.708	1.6	0.095	1.487	1.665	1.571	0.094	1.469	1.547	1.808	0.092	1.654	1.713	1.657	0.093	1.566	1.644	1.556	0.094	1.829	1.918	1.913	0.093	1.659	1.813	1.82	0.095	1.884	1.746	1.639	0.093	1.773	1.685	1.675
	1 day, 20:15:12	37	1.535	1.681	1.742	0.094	1.631	1.548	1.598	0.094	1.797	1.768	1.832	0.094	1.565	1.707	1.599	0.094	1.474	1.656	1.565	0.094	1.46	1.541	1.808	0.092	1.654	1.711	1.657	0.093	1.585	1.568	1.573	0.094	1.827	1.917	1.912	0.093	1.658	1.812	1.819	0.095	1.883	1.746	1.639	0.093	1.772	1.685	1.674
	1 day, 20:30:12	37	1.536	1.679	1.741	0.094	1.635	1.546	1.591	0.094	1.796	1.769	1.831	0.094	1.565	1.706	1.599	0.095	1.482	1.667	1.568	0.094	1.445	1.537	1.807	0.092	1.653	1.71	1.656	0.093	1.611	1.597	1.585	0.094	1.825	1.917	1.911	0.093	1.658	1.812	1.817	0.095	1.882	1.746	1.639	0.093	1.772	1.685	1.674
	1 day, 20:45:12	37	1.537	1.677	1.74	0.094	1.633	1.543	1.594	0.094	1.795	1.77	1.83	0.094	1.566	1.706	1.6	0.095	1.48	1.629	1.571	0.094	1.439	1.537	1.806	0.091	1.653	1.709	1.656	0.093	1.579	1.578	1.597	0.094	1.824	1.916	1.91	0.093	1.657	1.811	1.817	0.096	1.882	1.746	1.64	0.093	1.771	1.684	1.673
	1 day, 21:00:12	37	1.538	1.679	1.739	0.094	1.638	1.556	1.599	0.094	1.794	1.77	1.827	0.094	1.566	1.705	1.601	0.095	1.476	1.674	1.583	0.094	1.436	1.54	1.806	0.092	1.652	1.707	1.656	0.093	1.554	1.641	1.579	0.094	1.822	1.915	1.909	0.093	1.657	1.81	1.815	0.095	1.881	1.746	1.64	0.093	1.77	1.684	1.673
	1 day, 21:15:12	37	1.538	1.675	1.738	0.094	1.638	1.558	1.605	0.094	1.792	1.77	1.825	0.094	1.566	1.704	1.6	0.095	1.484	1.604	1.564	0.094	1.433	1.541	1.805	0.091	1.652	1.706	1.656	0.093	1.567	1.641	1.59	0.094	1.821	1.915	1.908	0.093	1.656	1.809	1.813	0.095	1.881	1.746	1.641	0.093	1.77	1.684	1.673
	1 day, 21:30:12	37	1.539	1.675	1.737	0.094	1.644	1.546	1.607	0.094	1.791	1.769	1.824	0.094	1.567	1.704	1.601	0.095	1.48	1.669	1.571	0.094	1.432	1.541	1.804	0.092	1.651	1.705	1.655	0.093	1.545	1.643	1.538	0.094	1.82	1.914	1.907	0.093	1.655	1.809	1.812	0.095	1.88	1.746	1.642	0.093	1.769	1.684	1.672
	1 day, 21:45:12	37	1.539	1.677	1.736	0.094	1.646	1.544	1.612	0.094	1.789	1.764	1.822	0.094	1.567	1.703	1.601	0.094	1.5	1.657	1.562	0.094	1.433	1.541	1.803	0.091	1.651	1.704	1.655	0.093	1.545	1.647	1.579	0.094	1.819	1.913	1.905	0.093	1.654	1.808	1.812	0.095	1.879	1.745	1.642	0.093	1.768	1.684	1.671
	1 day, 22:00:12	37	1.54	1.676	1.735	0.094	1.648	1.551	1.626	0.094	1.788	1.766	1.821	0.094	1.567	1.703	1.602	0.094	1.476	1.63	1.591	0.094	1.433	1.544	1.802	0.091	1.651	1.702	1.655	0.093	1.551	1.639	1.576	0.094	1.817	1.913	1.904	0.093	1.654	1.807	1.811	0.095	1.878	1.745	1.641	0.093	1.768	1.682	1.671
	1 day, 22:15:12	37	1.54	1.676	1.734	0.094	1.651	1.545	1.616	0.094	1.788	1.766	1.82	0.094	1.567	1.702	1.602	0.095	1.487	1.64	1.567	0.094	1.432	1.544	1.801	0.091	1.65	1.701	1.655	0.093	1.605	1.609	1.585	0.094	1.816	1.911	1.903	0.093	1.653	1.806	1.81	0.096	1.878	1.745	1.642	0.093	1.767	1.681	1.67
	1 day, 22:30:12	37	1.541	1.674	1.733	0.094	1.645	1.548	1.586	0.094	1.787	1.767	1.819	0.094	1.568	1.701	1.602	0.095	1.484	1.64	1.563	0.094	1.434	1.547	1.8	0.091	1.649	1.7	1.654	0.093	1.54	1.663	1.545	0.094	1.815	1.911	1.901	0.093	1.653	1.805	1.808	0.095	1.878	1.745	1.642	0.093	1.766	1.682	1.668
	1 day, 22:45:12	37	1.542	1.674	1.732	0.094	1.655	1.545	1.603	0.094	1.785	1.768	1.817	0.094	1.569	1.7	1.602	0.095	1.478	1.637	1.56	0.094	1.437	1.548	1.799	0.092	1.649	1.698	1.654	0.093	1.59	1.674	1.57	0.094	1.813	1.91	1.9	0.093	1.653	1.805	1.807	0.095	1.877	1.745	1.643	0.093	1.765	1.681	1.669
	1 day, 23:00:12	37	1.542	1.673	1.731	0.094	1.644	1.556	1.606	0.094	1.784	1.769	1.816	0.093	1.569	1.699	1.603	0.094	1.486	1.672	1.57	0.094	1.438	1.547	1.798	0.091	1.648	1.697	1.654	0.093	1.6	1.654	1.562	0.094	1.812	1.909	1.898	0.093	1.652	1.804	1.806	0.095	1.876	1.745	1.643	0.093	1.765	1.682	1.668
	1 day, 23:15:12	37	1.542	1.67	1.73	0.094	1.656	1.55	1.617	0.094	1.783	1.771	1.815	0.094	1.569	1.699	1.603	0.095	1.485	1.637	1.562	0.094	1.44	1.558	1.797	0.092	1.647	1.696	1.654	0.093	1.592	1.668	1.587	0.094	1.811	1.908	1.897	0.093	1.651	1.804	1.805	0.095	1.875	1.744	1.643	0.093	1.764	1.68	1.667
	1 day, 23:30:12	37	1.543	1.672	1.729	0.094	1.644	1.546	1.605	0.094	1.782	1.768	1.814	0.094	1.57	1.698	1.603	0.095	1.508	1.628	1.563	0.094	1.44	1.563	1.795	0.091	1.647	1.694	1.653	0.093	1.558	1.656	1.587	0.094	1.81	1.908	1.895	0.093	1.65	1.802	1.804	0.095	1.874	1.744	1.643	0.093	1.762	1.679	1.667
	1 day, 23:45:12	36.9	1.543	1.67	1.728	0.094	1.653	1.549	1.617	0.094	1.781	1.766	1.813	0.094	1.571	1.698	1.604	0.095	1.495	1.615	1.561	0.094	1.44	1.567	1.794	0.092	1.646	1.693	1.653	0.093	1.545	1.673	1.573	0.094	1.808	1.907	1.893	0.093	1.65	1.802	1.804	0.095	1.874	1.744	1.645	0.093	1.762	1.679	1.666
	2 days, 0:00:12	37	1.543	1.669	1.727	0.094	1.647	1.547	1.609	0.094	1.78	1.77	1.812	0.094	1.571	1.696	1.604	0.095	1.494	1.616	1.569	0.094	1.442	1.573	1.792	0.092	1.646	1.692	1.653	0.093	1.602	1.653	1.59	0.094	1.807	1.906	1.892	0.093	1.649	1.801	1.803	0.095	1.873	1.744	1.645	0.093	1.761	1.679	1.665
	2 days, 0:15:12	37	1.543	1.672	1.726	0.094	1.654	1.549	1.615	0.094	1.779	1.766	1.81	0.094	1.571	1.696	1.603	0.094	1.491	1.608	1.563	0.094	1.443	1.576	1.791	0.091	1.645	1.69	1.653	0.093	1.573	1.68	1.558	0.094	1.806	1.905	1.89	0.093	1.648	1.8	1.802	0.095	1.872	1.744	1.644	0.093	1.76	1.679	1.665
	2 days, 0:30:12	37	1.544	1.67	1.725	0.094	1.651	1.548	1.618	0.094	1.778	1.758	1.809	0.094	1.572	1.695	1.604	0.095	1.49	1.647	1.57	0.094	1.443	1.58	1.79	0.092	1.644	1.688	1.653	0.093	1.584	1.697	1.585	0.094	1.804	1.904	1.888	0.093	1.647	1.8	1.801	0.095	1.872	1.744	1.644	0.093	1.759	1.678	1.665
	2 days, 0:45:12	37	1.544	1.67	1.724	0.094	1.654	1.545	1.613	0.094	1.777	1.755	1.807	0.094	1.572	1.694	1.604	0.095	1.497	1.594	1.599	0.094	1.444	1.583	1.788	0.092	1.644	1.687	1.652	0.093	1.579	1.677	1.546	0.094	1.804	1.904	1.886	0.093	1.646	1.799	1.8	0.095	1.871	1.743	1.644	0.093	1.758	1.678	1.664
	2 days, 1:00:12	37	1.545	1.669	1.723	0.094	1.659	1.557	1.611	0.094	1.776	1.755	1.805	0.094	1.573	1.693	1.604	0.095	1.548	1.596	1.595	0.094	1.445	1.586	1.787	0.092	1.644	1.686	1.652	0.093	1.567	1.677	1.576	0.094	1.802	1.903	1.885	0.093	1.646	1.798	1.8	0.095	1.871	1.743	1.645	0.093	1.757	1.678	1.664
	00:00:00
	00:00:00
	00:00:00
	00:00:00
	00:00:00
	00:00:00
	00:00:00
	00:00:00
	00:00:00
	00:00:00
	00:00:00
	00:00:00
	00:00:00
	00:00:00
	00:00:00
	00:00:00
	00:00:00
	00:00:00
	00:00:00
	00:00:00
	00:00:00
	00:00:00
	00:00:00
	00:00:00
	00:00:00
	00:00:00
	00:00:00
	00:00:00
	00:00:00
	00:00:00
	00:00:00
	00:00:00
	00:00:00
	00:00:00
	00:00:00
	00:00:00
	00:00:00
	00:00:00
	00:00:00
	00:00:00
	00:00:00
	00:00:00
	00:00:00
	00:00:00
	00:00:00
	00:00:00
	00:00:00
	00:00:00
	00:00:00
	00:00:00
	00:00:00
	00:00:00
	00:00:00
	00:00:00
	00:00:00
	00:00:00
	00:00:00
	00:00:00
	00:00:00
	00:00:00
	00:00:00
	00:00:00
	00:00:00
	00:00:00
	00:00:00
	00:00:00
	00:00:00
	00:00:00
	00:00:00
	00:00:00
	00:00:00
	00:00:00
	00:00:00
	00:00:00
	00:00:00
	00:00:00
	00:00:00
	00:00:00
	00:00:00
	00:00:00
	00:00:00
	00:00:00
	00:00:00
	00:00:00
	00:00:00
	00:00:00
	00:00:00
	00:00:00
	00:00:00
	00:00:00
	00:00:00
	00:00:00
Results
		1	2	3	4	5	6	7	8	9	10	11	12
	A	3.799	3.799	3.742	-2.339	3.555	3.471	3.394	-2.431	3.557	4.553	3.437	-2.111	Max V [600]
		1	1	1	0.497	1	1	1	0.501	1	0.994	1	0.5	R-Squared [600]
		08:30:12	08:30:12	08:30:12	00:30:12	07:45:12	06:45:12	07:00:12	00:30:12	20:30:12	22:00:12	21:45:12	00:30:12	t at Max V [600]
		06:31:41	06:38:11	06:31:22	?????	05:54:19	05:19:12	05:22:35	?????	15:49:32	19:45:45	16:50:43	?????	Lagtime [600]
	B	3.962	3.869	3.508	-3.399	3.655	3.703	3.512	-2.999	6.081	5.263	4.872	-2.439	Max V [600]
		1	1	1	0.619	1	1	1	0.571	0.996	0.999	0.967	0.5	R-Squared [600]
		08:15:12	08:30:12	08:45:12	00:30:12	07:15:12	06:45:12	06:45:12	00:30:12	21:45:12	20:45:12	20:00:12	00:30:12	t at Max V [600]
		06:22:46	06:43:43	06:45:37	?????	05:41:05	05:06:08	04:53:35	?????	19:51:44	18:19:18	17:22:02	?????	Lagtime [600]
	C	4.105	3.93	4.094	-3.441	4.103	3.797	3.895	-3.496	4	4.301	3.971	-2.491	Max V [600]
		1	1	1	0.72	1	1	1	0.719	0.97	1	0.916	0.501	R-Squared [600]
		08:30:12	08:30:12	08:15:12	00:30:12	07:30:12	07:15:12	06:45:12	00:30:12	17:00:12	18:45:12	14:30:12	00:30:12	t at Max V [600]
		06:39:47	06:20:04	06:31:20	?????	05:39:17	05:26:32	05:23:51	?????	13:56:23	14:04:20	11:04:32	?????	Lagtime [600]
	D	3.851	3.942	3.709	-3.428	3.471	3.463	3.851	-2.715	3.859	4.071	3.979	-2.875	Max V [600]
		1	0.999	1	0.701	1	1	1	0.506	1	1	1	0.501	R-Squared [600]
		08:30:12	08:30:12	08:15:12	00:30:12	07:45:12	07:45:12	07:30:12	00:30:12	07:15:12	07:15:12	07:30:12	00:30:12	t at Max V [600]
		06:44:17	06:40:32	06:19:40	?????	05:40:14	05:44:41	05:32:52	?????	05:22:49	05:24:33	05:10:35	?????	Lagtime [600]
	E	3.011	3.01	3.479	-2.567	0.006	-0.01	-0.006	0.005	-0.009	0.005	-0.008	-0.008	Max V [600]
		1	0.99	0.994	0.477	0.75	0.84	0.547	0.942	0.681	0.727	0.766	0.679	R-Squared [600]
		1 day, 5:00:12	23:45:12	21:30:12	00:30:12	06:45:12	00:30:12	00:30:12	1 day, 16:30:12	00:30:12	1 day, 10:15:12	00:30:12	00:30:12	t at Max V [600]
		22:46:13	20:05:40	18:27:12	?????	07:38:32	?????	?????	1 day, 16:17:21	?????	1 day, 11:26:27	?????	?????	Lagtime [600]
	F	2.901	3.523	3.295	-2.926	-0.019	-0.008	-0.005	-0.006	-0.007	-0.009	-0.02	-0.011	Max V [600]
		0.97	0.977	1	0.499	0.48	0.75	0.533	0.92	0.893	0.768	0.551	0.821	R-Squared [600]
		20:00:12	20:15:12	19:45:12	00:30:12	00:30:12	00:30:12	00:30:12	1 day, 14:00:12	00:30:12	00:30:12	00:30:12	00:30:12	t at Max V [600]
		15:18:46	16:27:15	12:56:33	?????	?????	?????	?????	1 day, 12:56:52	?????	?????	?????	?????	Lagtime [600]
	G	3.724	3.865	4.05	-2.579	-0.006	-0.009	-0.007	-0.006	-0.006	-0.007	-0.015	-0.007	Max V [600]
		0.974	0.909	0.955	0.5	0.614	0.681	0.581	0.321	0.75	0.658	0.568	0.472	R-Squared [600]
		17:45:12	12:30:12	15:15:12	00:30:12	01:30:12	00:30:12	00:30:12	00:30:12	00:30:12	00:30:12	00:30:12	00:30:12	t at Max V [600]
		13:45:43	08:46:19	11:27:37	?????	00:50:12	?????	?????	?????	?????	?????	?????	?????	Lagtime [600]
	H	4.003	3.865	3.815	-2.447	-0.009	-0.006	-0.009	-0.008	-0.007	-0.007	0.006	0.005	Max V [600]
		1	1	1	0.502	0.925	0.88	0.731	0.655	0.676	0.714	0.75	0.942	R-Squared [600]
		08:15:12	08:15:12	07:45:12	00:30:12	00:30:12	00:30:12	00:30:12	00:30:12	00:30:12	00:30:12	1 day, 10:15:12	13:30:12	t at Max V [600]
		06:22:30	06:18:34	06:05:27	?????	?????	?????	?????	?????	?????	?????	1 day, 11:08:32	14:43:03	Lagtime [600]
[truncated: 49 more columns]

## Sheet: Analysis
	Time	A1	A2	A3	A4		A5	A6	A7	A8		A9	A10	A11	A12		B1	B2	B3	B4		B5	B6	B7	B8		B9	B10	B11	B12		C1	C2	C3	C4		C5	C6	C7	C8		C9	C10	C11	C12		D1	D2	D3
	00:00:12	0.288	0.289	0.302	0.271	0.022	0.354	0.345	0.352	0.277	0.0733333	0.352	0.318	0.31	0.252	0.0746667	0.337	0.349	0.341	0.33	0.0123333	0.337	0.376	0.387	0.309	0.0576667	0.398	0.367	0.364	0.275	0.101333	0.35	0.279	0.359	0.315	0.0143333	0.365	0.364	0.373	0.319	0.0483333	0.376	0.375	0.333	0.28	0.0813333	0.363	0.34	0.346
	00:15:12	0.114	0.115	0.118	0.094	0.0216667	0.137	0.147	0.154	0.095	0.051	0.153	0.145	0.14	0.094	0.052	0.119	0.12	0.134	0.134	-0.00966667	0.176	0.191	0.211	0.115	0.0776667	0.18	0.162	0.146	0.092	0.0706667	0.118	0.123	0.152	0.167	-0.036	0.215	0.223	0.216	0.168	0.05	0.202	0.166	0.147	0.093	0.0786667	0.134	0.121	0.167
	00:30:12	0.115	0.115	0.119	0.095	0.0213333	0.138	0.148	0.156	0.095	0.0523333	0.155	0.146	0.141	0.094	0.0533333	0.121	0.119	0.116	0.094	0.0246667	0.137	0.156	0.171	0.094	0.0606667	0.183	0.164	0.149	0.092	0.0733333	0.118	0.124	0.129	0.093	0.0306667	0.136	0.14	0.144	0.094	0.046	0.15	0.165	0.149	0.093	0.0616667	0.134	0.121	0.127
	00:45:12	0.115	0.115	0.119	0.095	0.0213333	0.139	0.15	0.158	0.094	0.055	0.157	0.147	0.143	0.094	0.055	0.122	0.119	0.117	0.095	0.0243333	0.138	0.159	0.174	0.095	0.062	0.186	0.167	0.15	0.092	0.0756667	0.118	0.124	0.129	0.093	0.0306667	0.138	0.142	0.147	0.094	0.0483333	0.152	0.168	0.151	0.093	0.064	0.135	0.121	0.128
	01:00:12	0.115	0.115	0.12	0.095	0.0216667	0.141	0.153	0.16	0.095	0.0563333	0.158	0.148	0.144	0.094	0.056	0.122	0.12	0.117	0.095	0.0246667	0.139	0.162	0.178	0.095	0.0646667	0.19	0.17	0.152	0.092	0.0786667	0.118	0.125	0.13	0.093	0.0313333	0.14	0.144	0.149	0.094	0.0503333	0.155	0.171	0.154	0.093	0.067	0.135	0.122	0.128
	01:15:12	0.116	0.116	0.121	0.095	0.0226667	0.142	0.155	0.163	0.094	0.0593333	0.16	0.15	0.145	0.094	0.0576667	0.123	0.12	0.118	0.095	0.0253333	0.141	0.166	0.182	0.095	0.068	0.193	0.173	0.154	0.092	0.0813333	0.119	0.126	0.131	0.093	0.0323333	0.142	0.147	0.151	0.094	0.0526667	0.157	0.175	0.157	0.093	0.07	0.136	0.123	0.13
	01:30:12	0.117	0.118	0.122	0.095	0.024	0.144	0.158	0.166	0.095	0.061	0.162	0.151	0.146	0.094	0.059	0.125	0.122	0.119	0.095	0.027	0.143	0.17	0.186	0.095	0.0713333	0.196	0.176	0.157	0.092	0.0843333	0.12	0.128	0.133	0.093	0.034	0.145	0.15	0.154	0.094	0.0556667	0.16	0.178	0.16	0.093	0.073	0.137	0.124	0.132
	01:45:12	0.119	0.119	0.123	0.094	0.0263333	0.146	0.162	0.17	0.094	0.0653333	0.164	0.153	0.148	0.094	0.061	0.126	0.123	0.121	0.095	0.0283333	0.146	0.174	0.191	0.095	0.0753333	0.199	0.178	0.16	0.092	0.087	0.122	0.129	0.134	0.093	0.0353333	0.148	0.154	0.158	0.094	0.0593333	0.162	0.182	0.164	0.093	0.0763333	0.138	0.126	0.134
	02:00:12	0.12	0.12	0.125	0.094	0.0276667	0.15	0.167	0.175	0.094	0.07	0.166	0.155	0.15	0.094	0.063	0.128	0.125	0.124	0.095	0.0306667	0.15	0.18	0.197	0.096	0.0796667	0.203	0.182	0.163	0.092	0.0906667	0.124	0.131	0.136	0.093	0.0373333	0.152	0.157	0.162	0.094	0.063	0.166	0.186	0.168	0.093	0.0803333	0.14	0.128	0.137
	02:15:12	0.121	0.122	0.127	0.094	0.0293333	0.154	0.172	0.18	0.094	0.0746667	0.169	0.158	0.153	0.094	0.066	0.131	0.127	0.126	0.095	0.033	0.153	0.186	0.203	0.096	0.0846667	0.208	0.187	0.167	0.091	0.0963333	0.126	0.134	0.139	0.093	0.04	0.157	0.163	0.167	0.094	0.0683333	0.17	0.192	0.173	0.093	0.0853333	0.142	0.13	0.14
	02:30:12	0.124	0.124	0.13	0.094	0.032	0.158	0.179	0.187	0.094	0.0806667	0.172	0.161	0.155	0.094	0.0686667	0.134	0.13	0.129	0.095	0.036	0.159	0.194	0.213	0.096	0.0926667	0.214	0.192	0.172	0.092	0.100667	0.128	0.137	0.142	0.093	0.0426667	0.162	0.17	0.173	0.094	0.0743333	0.175	0.198	0.179	0.093	0.091	0.145	0.133	0.143
	02:45:12	0.128	0.127	0.134	0.094	0.0356667	0.164	0.186	0.195	0.094	0.0876667	0.175	0.164	0.159	0.094	0.072	0.138	0.134	0.132	0.095	0.0396667	0.165	0.203	0.224	0.095	0.102333	0.222	0.199	0.177	0.092	0.107333	0.132	0.141	0.146	0.093	0.0466667	0.169	0.177	0.181	0.094	0.0816667	0.181	0.207	0.186	0.093	0.0983333	0.148	0.137	0.148
	03:00:12	0.132	0.131	0.138	0.094	0.0396667	0.17	0.196	0.204	0.094	0.096	0.179	0.167	0.162	0.094	0.0753333	0.143	0.139	0.137	0.095	0.0446667	0.172	0.215	0.236	0.095	0.112667	0.23	0.207	0.184	0.092	0.115	0.136	0.146	0.152	0.093	0.0516667	0.176	0.186	0.191	0.094	0.0903333	0.188	0.216	0.195	0.093	0.106667	0.153	0.142	0.154
	03:15:12	0.137	0.135	0.143	0.094	0.0443333	0.179	0.207	0.214	0.094	0.106	0.184	0.171	0.166	0.094	0.0796667	0.149	0.144	0.142	0.095	0.05	0.181	0.228	0.251	0.095	0.125	0.241	0.216	0.191	0.092	0.124	0.141	0.152	0.157	0.093	0.057	0.187	0.197	0.202	0.094	0.101333	0.196	0.227	0.204	0.093	0.116	0.159	0.148	0.161
	03:30:12	0.142	0.141	0.149	0.094	0.05	0.189	0.22	0.227	0.094	0.118	0.19	0.176	0.17	0.094	0.0846667	0.156	0.15	0.149	0.095	0.0566667	0.191	0.244	0.27	0.095	0.14	0.254	0.226	0.2	0.092	0.134667	0.147	0.158	0.164	0.093	0.0633333	0.198	0.21	0.215	0.094	0.113667	0.206	0.239	0.216	0.093	0.127333	0.165	0.154	0.169
	03:45:12	0.148	0.146	0.156	0.094	0.056	0.2	0.235	0.241	0.094	0.131333	0.195	0.181	0.175	0.094	0.0896667	0.164	0.157	0.157	0.095	0.0643333	0.202	0.262	0.289	0.095	0.156	0.266	0.237	0.21	0.092	0.145667	0.154	0.166	0.172	0.093	0.071	0.211	0.225	0.229	0.094	0.127667	0.216	0.253	0.228	0.093	0.139333	0.172	0.161	0.177
	04:00:12	0.157	0.154	0.165	0.094	0.0646667	0.214	0.253	0.258	0.095	0.146667	0.202	0.187	0.18	0.094	0.0956667	0.174	0.166	0.166	0.095	0.0736667	0.217	0.282	0.313	0.095	0.175667	0.282	0.25	0.221	0.092	0.159	0.162	0.175	0.182	0.093	0.08	0.228	0.242	0.248	0.094	0.145333	0.228	0.268	0.244	0.093	0.153667	0.181	0.17	0.188
	04:15:12	0.167	0.162	0.175	0.094	0.074	0.229	0.273	0.278	0.094	0.166	0.209	0.194	0.186	0.094	0.102333	0.185	0.177	0.175	0.095	0.084	0.231	0.306	0.338	0.094	0.197667	0.297	0.266	0.234	0.092	0.173667	0.172	0.186	0.194	0.093	0.091	0.247	0.261	0.269	0.094	0.165	0.243	0.287	0.26	0.093	0.170333	0.191	0.181	0.201
	04:30:12	0.178	0.172	0.186	0.094	0.0846667	0.246	0.295	0.3	0.094	0.186333	0.217	0.202	0.194	0.094	0.110333	0.2	0.189	0.188	0.095	0.0973333	0.251	0.334	0.368	0.094	0.223667	0.316	0.281	0.249	0.092	0.19	0.183	0.199	0.206	0.093	0.103	0.268	0.284	0.291	0.094	0.187	0.259	0.307	0.278	0.093	0.188333	0.203	0.193	0.214
	04:45:12	0.19	0.184	0.2	0.094	0.0973333	0.266	0.322	0.324	0.094	0.21	0.226	0.21	0.202	0.094	0.118667	0.215	0.202	0.201	0.095	0.111	0.274	0.364	0.401	0.094	0.252333	0.336	0.299	0.265	0.092	0.208	0.197	0.214	0.221	0.093	0.117667	0.291	0.309	0.318	0.094	0.212	0.276	0.329	0.297	0.093	0.207667	0.216	0.207	0.23
	05:00:12	0.205	0.197	0.216	0.094	0.112	0.289	0.351	0.353	0.094	0.237	0.235	0.219	0.21	0.094	0.127333	0.233	0.217	0.215	0.095	0.126667	0.297	0.4	0.439	0.094	0.284667	0.356	0.318	0.282	0.092	0.226667	0.214	0.229	0.237	0.093	0.133667	0.319	0.339	0.348	0.094	0.241333	0.295	0.351	0.319	0.093	0.228667	0.232	0.222	0.247
	05:15:12	0.223	0.213	0.235	0.094	0.129667	0.315	0.382	0.383	0.094	0.266	0.246	0.229	0.221	0.094	0.138	0.255	0.235	0.234	0.095	0.146333	0.325	0.438	0.48	0.094	0.320333	0.378	0.34	0.302	0.092	0.248	0.232	0.248	0.257	0.093	0.152667	0.35	0.373	0.384	0.094	0.275	0.317	0.376	0.344	0.093	0.252667	0.249	0.24	0.268
	05:30:12	0.243	0.232	0.255	0.094	0.149333	0.344	0.418	0.417	0.094	0.299	0.258	0.24	0.23	0.094	0.148667	0.277	0.256	0.253	0.095	0.167	0.352	0.481	0.525	0.094	0.358667	0.401	0.364	0.322	0.092	0.270333	0.253	0.269	0.28	0.093	0.174333	0.387	0.412	0.424	0.094	0.313667	0.34	0.404	0.37	0.093	0.278333	0.269	0.262	0.291
	05:45:12	0.266	0.253	0.278	0.094	0.171667	0.377	0.456	0.453	0.094	0.334667	0.27	0.252	0.242	0.094	0.160667	0.305	0.279	0.276	0.095	0.191667	0.387	0.528	0.577	0.094	0.403333	0.427	0.389	0.344	0.092	0.294667	0.278	0.293	0.306	0.093	0.199333	0.427	0.453	0.469	0.094	0.355667	0.365	0.432	0.398	0.093	0.305333	0.289	0.284	0.317
	06:00:12	0.292	0.277	0.304	0.094	0.197	0.412	0.496	0.494	0.094	0.373333	0.283	0.264	0.254	0.094	0.173	0.336	0.304	0.299	0.095	0.218	0.426	0.579	0.624	0.094	0.449	0.454	0.416	0.367	0.092	0.320333	0.306	0.321	0.337	0.093	0.228333	0.472	0.502	0.519	0.094	0.403667	0.391	0.465	0.429	0.093	0.335333	0.315	0.311	0.349
	06:15:12	0.32	0.306	0.333	0.094	0.225667	0.451	0.541	0.538	0.094	0.416	0.296	0.278	0.267	0.094	0.186333	0.371	0.333	0.326	0.095	0.248333	0.472	0.631	0.673	0.094	0.498	0.48	0.444	0.393	0.092	0.347	0.339	0.353	0.371	0.093	0.261333	0.525	0.552	0.574	0.094	0.456333	0.423	0.499	0.462	0.093	0.368333	0.345	0.34	0.384
	06:30:12	0.352	0.336	0.366	0.094	0.257333	0.495	0.589	0.581	0.094	0.461	0.311	0.291	0.281	0.094	0.200333	0.409	0.365	0.356	0.095	0.281667	0.518	0.689	0.726	0.094	0.550333	0.508	0.472	0.42	0.092	0.374667	0.373	0.385	0.407	0.093	0.295333	0.577	0.607	0.629	0.094	0.510333	0.454	0.531	0.499	0.093	0.401667	0.377	0.373	0.422
	06:45:12	0.389	0.37	0.402	0.094	0.293	0.541	0.642	0.632	0.094	0.511	0.327	0.307	0.295	0.094	0.215667	0.451	0.4	0.389	0.095	0.318333	0.572	0.743	0.781	0.094	0.604667	0.536	0.505	0.449	0.092	0.404667	0.414	0.423	0.448	0.093	0.335333	0.635	0.662	0.69	0.094	0.568333	0.486	0.566	0.538	0.093	0.437	0.416	0.409	0.464
	07:00:12	0.427	0.408	0.441	0.094	0.331333	0.591	0.695	0.682	0.094	0.562	0.343	0.323	0.312	0.094	0.232	0.497	0.442	0.426	0.095	0.36	0.626	0.798	0.833	0.094	0.658333	0.567	0.535	0.484	0.092	0.436667	0.459	0.466	0.498	0.093	0.381333	0.698	0.722	0.747	0.094	0.628333	0.519	0.601	0.574	0.093	0.471667	0.455	0.451	0.509
	07:15:12	0.472	0.452	0.484	0.094	0.375333	0.641	0.748	0.735	0.094	0.614	0.36	0.34	0.328	0.094	0.248667	0.552	0.486	0.466	0.095	0.406333	0.682	0.854	0.883	0.094	0.712333	0.595	0.565	0.509	0.092	0.464333	0.507	0.514	0.549	0.093	0.430333	0.759	0.776	0.807	0.094	0.686667	0.553	0.639	0.615	0.093	0.509333	0.5	0.495	0.559
	07:30:12	0.519	0.499	0.532	0.094	0.422667	0.695	0.796	0.784	0.094	0.664333	0.378	0.358	0.346	0.094	0.266667	0.607	0.535	0.508	0.095	0.455	0.736	0.908	0.931	0.094	0.764333	0.625	0.595	0.542	0.092	0.495333	0.561	0.564	0.603	0.093	0.483	0.82	0.834	0.862	0.094	0.744667	0.59	0.669	0.656	0.093	0.545333	0.551	0.543	0.609
	07:45:12	0.572	0.547	0.584	0.094	0.473667	0.75	0.847	0.833	0.094	0.716	0.396	0.376	0.365	0.094	0.285	0.664	0.59	0.559	0.095	0.509333	0.791	0.958	0.974	0.094	0.813667	0.654	0.625	0.574	0.092	0.525667	0.621	0.616	0.663	0.093	0.540333	0.882	0.89	0.917	0.094	0.802333	0.628	0.703	0.697	0.093	0.583	0.603	0.6	0.663
	08:00:12	0.625	0.601	0.635	0.094	0.526333	0.802	0.895	0.879	0.094	0.764667	0.416	0.396	0.385	0.094	0.305	0.722	0.645	0.606	0.095	0.562667	0.843	1.005	1.021	0.094	0.862333	0.685	0.654	0.607	0.092	0.556667	0.681	0.673	0.722	0.093	0.599	0.944	0.944	0.968	0.094	0.858	0.662	0.738	0.732	0.093	0.617667	0.654	0.655	0.718
	08:15:12	0.681	0.656	0.691	0.094	0.582	0.854	0.94	0.923	0.094	0.811667	0.436	0.415	0.406	0.094	0.325	0.782	0.704	0.655	0.095	0.618667	0.896	1.038	1.065	0.094	0.905667	0.709	0.682	0.638	0.092	0.584333	0.74	0.732	0.784	0.093	0.659	1	0.991	1.02	0.094	0.909667	0.681	0.767	0.767	0.093	0.645333	0.713	0.712	0.774
	08:30:12	0.738	0.715	0.745	0.094	0.638667	0.902	0.973	0.965	0.094	0.852667	0.458	0.435	0.427	0.094	0.346	0.844	0.762	0.708	0.095	0.676333	0.944	1.091	1.104	0.094	0.952333	0.738	0.708	0.668	0.092	0.612667	0.804	0.79	0.848	0.093	0.721	1.053	1.038	1.064	0.094	0.957667	0.715	0.799	0.801	0.093	0.678667	0.771	0.771	0.831
	08:45:12	0.795	0.773	0.802	0.094	0.696	0.95	1.012	1.007	0.094	0.895667	0.478	0.456	0.447	0.094	0.366333	0.9	0.82	0.76	0.095	0.731667	0.986	1.124	1.14	0.094	0.989333	0.762	0.734	0.699	0.092	0.639667	0.864	0.851	0.907	0.093	0.781	1.1	1.084	1.107	0.094	1.003	0.746	0.825	0.831	0.093	0.707667	0.829	0.836	0.885
	09:00:12	0.852	0.828	0.86	0.094	0.752667	0.995	1.051	1.044	0.094	0.936	0.499	0.476	0.469	0.094	0.387333	0.954	0.877	0.813	0.095	0.786333	1.026	1.149	1.174	0.094	1.02233	0.786	0.757	0.727	0.092	0.664667	0.927	0.908	0.965	0.093	0.840333	1.143	1.123	1.144	0.094	1.04267	0.779	0.853	0.858	0.093	0.737	0.885	0.889	0.937
	09:15:12	0.907	0.88	0.912	0.094	0.805667	1.034	1.085	1.08	0.094	0.972333	0.519	0.496	0.493	0.094	0.408667	1.006	0.931	0.865	0.095	0.839	1.07	1.193	1.206	0.094	1.06233	0.809	0.779	0.754	0.092	0.688667	0.983	0.963	1.022	0.093	0.896333	1.182	1.16	1.177	0.094	1.079	0.807	0.875	0.883	0.093	0.762	0.94	0.942	0.986
	09:30:12	0.964	0.934	0.964	0.094	0.86	1.072	1.117	1.112	0.094	1.00633	0.538	0.519	0.514	0.094	0.429667	1.059	0.985	0.917	0.095	0.892	1.107	1.226	1.235	0.094	1.09533	0.828	0.802	0.778	0.092	0.710667	1.036	1.018	1.074	0.093	0.949667	1.221	1.196	1.211	0.094	1.11533	0.836	0.866	0.91	0.093	0.777667	0.992	0.994	1.033
	09:45:12	1.014	0.983	1.012	0.094	0.909	1.107	1.145	1.142	0.094	1.03733	0.558	0.537	0.537	0.094	0.45	1.106	1.036	0.967	0.095	0.941333	1.139	1.239	1.262	0.094	1.11933	0.848	0.822	0.802	0.092	0.732	1.09	1.067	1.119	0.093	0.999	1.255	1.23	1.242	0.094	1.14833	0.863	0.889	0.934	0.093	0.802333	1.044	1.046	1.078
	10:00:12	1.063	1.033	1.058	0.094	0.957333	1.139	1.176	1.168	0.094	1.067	0.577	0.559	0.557	0.094	0.470333	1.151	1.083	1.015	0.095	0.988	1.169	1.273	1.285	0.094	1.14833	0.769	0.84	0.824	0.092	0.719	1.14	1.111	1.165	0.093	1.04567	1.287	1.26	1.27	0.094	1.17833	0.886	0.908	0.956	0.093	0.823667	1.089	1.091	1.119
	10:15:12	1.107	1.077	1.1	0.094	1.00067	1.167	1.197	1.192	0.094	1.09133	0.594	0.579	0.577	0.094	0.489333	1.192	1.127	1.059	0.095	1.031	1.196	1.296	1.305	0.094	1.17167	0.785	0.859	0.846	0.092	0.738	1.186	1.153	1.21	0.093	1.09	1.313	1.285	1.294	0.094	1.20333	0.91	0.924	0.978	0.093	0.844333	1.133	1.132	1.161
	10:30:12	1.15	1.121	1.142	0.094	1.04367	1.188	1.213	1.209	0.094	1.10933	0.614	0.597	0.595	0.094	0.508	1.231	1.166	1.097	0.095	1.06967	1.217	1.288	1.32	0.094	1.181	0.801	0.872	0.865	0.092	0.754	1.232	1.196	1.25	0.093	1.133	1.335	1.306	1.315	0.094	1.22467	0.928	0.941	0.995	0.093	0.861667	1.176	1.173	1.195
	10:45:12	1.192	1.157	1.182	0.094	1.083	1.198	1.221	1.216	0.094	1.11767	0.63	0.614	0.615	0.094	0.525667	1.265	1.205	1.138	0.095	1.10767	1.229	1.314	1.325	0.094	1.19533	0.814	0.884	0.879	0.092	0.767	1.271	1.234	1.285	0.093	1.17033	1.35	1.32	1.328	0.094	1.23867	0.943	0.954	1.009	0.093	0.875667	1.216	1.21	1.227
	11:00:12	1.232	1.198	1.216	0.094	1.12133	1.202	1.224	1.216	0.094	1.12	0.647	0.631	0.632	0.094	0.542667	1.298	1.239	1.173	0.095	1.14167	1.235	1.297	1.328	0.094	1.19267	0.822	0.893	0.891	0.092	0.776667	1.305	1.266	1.319	0.093	1.20367	1.359	1.328	1.338	0.094	1.24767	0.951	0.962	1.017	0.093	0.883667	1.251	1.243	1.258
	11:15:12	1.265	1.23	1.248	0.094	1.15367	1.204	1.227	1.217	0.094	1.122	0.663	0.645	0.648	0.094	0.558	1.327	1.273	1.206	0.095	1.17367	1.238	1.317	1.331	0.094	1.20133	0.827	0.898	0.897	0.092	0.782	1.337	1.297	1.348	0.093	1.23433	1.364	1.332	1.341	0.094	1.25167	0.958	0.967	1.024	0.093	0.89	1.282	1.276	1.286
	11:30:12	1.298	1.258	1.28	0.094	1.18467	1.204	1.228	1.217	0.094	1.12233	0.676	0.661	0.662	0.094	0.572333	1.353	1.304	1.235	0.095	1.20233	1.24	1.298	1.333	0.094	1.19633	0.832	0.902	0.904	0.092	0.787333	1.364	1.325	1.374	0.093	1.26133	1.369	1.337	1.342	0.094	1.25533	0.965	0.972	1.026	0.093	0.894667	1.31	1.305	1.312
	11:45:12	1.328	1.288	1.307	0.094	1.21367	1.202	1.229	1.217	0.094	1.122	0.689	0.674	0.679	0.094	0.586667	1.369	1.33	1.256	0.095	1.22333	1.241	1.319	1.334	0.094	1.204	0.835	0.905	0.91	0.092	0.791333	1.388	1.35	1.39	0.093	1.283	1.373	1.341	1.345	0.094	1.259	0.967	0.975	1.031	0.093	0.898	1.333	1.331	1.332
	12:00:12	1.354	1.197	1.331	0.094	1.2	1.202	1.231	1.22	0.094	1.12367	0.701	0.687	0.691	0.094	0.599	1.384	1.353	1.274	0.095	1.242	1.246	1.303	1.339	0.094	1.202	0.838	0.906	0.911	0.092	0.793	1.405	1.37	1.403	0.093	1.29967	1.378	1.346	1.347	0.094	1.263	0.971	0.977	1.034	0.093	0.901	1.352	1.353	1.349
	12:15:12	1.375	1.218	1.349	0.094	1.22	1.204	1.235	1.221	0.094	1.126	0.709	0.695	0.701	0.094	0.607667	1.395	1.367	1.288	0.095	1.255	1.25	1.325	1.344	0.094	1.21233	0.839	0.909	0.914	0.092	0.795333	1.42	1.383	1.415	0.093	1.313	1.382	1.35	1.352	0.094	1.26733	0.973	0.98	1.037	0.093	0.903667	1.364	1.368	1.36
	12:30:12	1.393	1.244	1.359	0.094	1.238	1.207	1.24	1.225	0.094	1.13	0.717	0.704	0.709	0.094	0.616	1.408	1.379	1.3	0.095	1.26733	1.255	1.313	1.348	0.094	1.21133	0.845	0.912	0.916	0.092	0.799	1.432	1.393	1.424	0.093	1.32333	1.387	1.355	1.357	0.094	1.27233	0.976	0.982	1.039	0.093	0.906	1.373	1.38	1.369
	12:45:12	1.408	1.265	1.362	0.094	1.251	1.212	1.246	1.232	0.094	1.136	0.723	0.711	0.717	0.094	0.623	1.418	1.39	1.313	0.095	1.27867	1.26	1.336	1.354	0.094	1.22267	0.848	0.915	0.919	0.092	0.802	1.444	1.402	1.435	0.093	1.334	1.391	1.361	1.361	0.094	1.277	0.977	0.984	1.043	0.093	0.908333	1.384	1.388	1.379
	13:00:12	1.419	1.291	1.382	0.094	1.27	1.217	1.252	1.237	0.094	1.14133	0.729	0.715	0.723	0.094	0.628333	1.427	1.401	1.322	0.095	1.28833	1.265	1.324	1.359	0.094	1.222	0.85	0.917	0.923	0.092	0.804667	1.452	1.407	1.443	0.093	1.341	1.396	1.366	1.365	0.094	1.28167	0.981	0.985	1.044	0.093	0.910333	1.393	1.395	1.387
	13:15:12	1.431	1.305	1.434	0.094	1.296	1.223	1.258	1.243	0.094	1.14733	0.732	0.72	0.727	0.094	0.632333	1.432	1.41	1.333	0.095	1.29667	1.272	1.346	1.363	0.094	1.233	0.853	0.919	0.926	0.092	0.807333	1.458	1.405	1.448	0.093	1.344	1.401	1.371	1.369	0.094	1.28633	0.986	0.987	1.048	0.093	0.914	1.401	1.404	1.393
	13:30:12	1.44	1.326	1.49	0.094	1.32467	1.229	1.264	1.249	0.094	1.15333	0.736	0.723	0.732	0.094	0.636333	1.437	1.417	1.338	0.095	1.30233	1.277	1.333	1.368	0.094	1.232	0.857	0.923	0.93	0.092	0.811333	1.463	1.402	1.452	0.093	1.346	1.405	1.375	1.374	0.094	1.29067	0.991	0.991	1.051	0.093	0.918	1.406	1.411	1.4
	13:45:12	1.447	1.335	1.49	0.094	1.33	1.235	1.268	1.253	0.094	1.158	0.74	0.727	0.735	0.094	0.64	1.441	1.424	1.343	0.095	1.30767	1.282	1.355	1.372	0.094	1.24233	0.859	0.926	0.933	0.092	0.814	1.468	1.457	1.453	0.093	1.36633	1.408	1.378	1.378	0.094	1.294	0.997	0.994	1.051	0.093	0.921	1.411	1.416	1.405
	14:00:12	1.452	1.345	1.482	0.094	1.33233	1.239	1.273	1.257	0.094	1.16233	0.744	0.73	0.739	0.094	0.643667	1.442	1.428	1.346	0.095	1.31033	1.286	1.342	1.376	0.094	1.24067	0.862	0.931	0.938	0.092	0.818333	1.471	1.513	1.455	0.093	1.38667	1.411	1.381	1.382	0.094	1.29733	1	0.998	1.045	0.093	0.921333	1.414	1.419	1.41
	14:15:12	1.455	1.352	1.486	0.094	1.337	1.242	1.276	1.261	0.094	1.16567	0.746	0.734	0.743	0.094	0.647	1.444	1.431	1.349	0.095	1.313	1.288	1.361	1.378	0.094	1.24833	0.866	0.935	0.941	0.092	0.822	1.472	1.506	1.454	0.093	1.38433	1.413	1.384	1.385	0.094	1.3	1.004	1.001	1.06	0.093	0.928667	1.417	1.42	1.413
	14:30:12	1.458	1.352	1.494	0.094	1.34067	1.245	1.28	1.263	0.094	1.16867	0.749	0.737	0.746	0.094	0.65	1.445	1.433	1.351	0.095	1.31467	1.29	1.346	1.382	0.094	1.24533	0.87	0.939	0.946	0.092	0.826333	1.474	1.51	1.452	0.093	1.38567	1.416	1.386	1.387	0.094	1.30233	1.008	1.004	1.144	0.093	0.959	1.418	1.417	1.413
	14:45:12	1.46	1.355	1.503	0.094	1.34533	1.246	1.281	1.265	0.095	1.169	0.754	0.74	0.75	0.094	0.654	1.446	1.434	1.353	0.095	1.316	1.289	1.365	1.382	0.094	1.25133	0.872	0.941	0.95	0.092	0.829	1.476	1.521	1.449	0.093	1.389	1.418	1.389	1.389	0.094	1.30467	1.011	1.005	1.25	0.093	0.995667	1.419	1.408	1.409
	15:00:12	1.46	1.356	1.514	0.094	1.34933	1.247	1.282	1.267	0.094	1.17133	0.758	0.743	0.754	0.094	0.657667	1.446	1.434	1.353	0.095	1.316	1.284	1.35	1.383	0.094	1.245	0.877	0.943	0.953	0.092	0.832333	1.476	1.537	1.446	0.093	1.39333	1.42	1.39	1.391	0.094	1.30633	1.013	0.997	1.248	0.093	0.993	1.421	1.419	1.399
	15:15:12	1.461	1.357	1.53	0.094	1.35533	1.249	1.283	1.27	0.094	1.17333	0.759	0.746	0.757	0.094	0.66	1.447	1.434	1.356	0.095	1.31733	1.28	1.368	1.385	0.094	1.25033	0.878	0.946	0.957	0.092	0.835	1.474	1.557	1.447	0.093	1.39967	1.421	1.391	1.391	0.094	1.307	1.015	1.004	1.251	0.093	0.997	1.421	1.463	1.405
	15:30:12	1.461	1.361	1.55	0.094	1.36333	1.249	1.284	1.27	0.094	1.17367	0.761	0.748	0.76	0.094	0.662333	1.447	1.433	1.357	0.095	1.31733	1.3	1.354	1.386	0.094	1.25267	0.882	0.949	0.959	0.091	0.839	1.474	1.582	1.448	0.093	1.40833	1.422	1.391	1.392	0.094	1.30767	1.016	1.072	1.267	0.093	1.02533	1.421	1.515	1.448
	15:45:12	1.462	1.359	1.573	0.094	1.37067	1.249	1.285	1.27	0.094	1.174	0.762	0.752	0.762	0.094	0.664667	1.447	1.43	1.357	0.095	1.31633	1.35	1.369	1.386	0.094	1.27433	0.882	0.951	0.961	0.092	0.839333	1.474	1.605	1.448	0.093	1.416	1.423	1.39	1.393	0.094	1.308	1.016	1.177	1.288	0.093	1.06733	1.42	1.526	1.518
	16:00:12	1.462	1.363	1.594	0.094	1.379	1.251	1.286	1.273	0.094	1.176	0.76	0.753	0.764	0.094	0.665	1.448	1.426	1.358	0.095	1.31567	1.398	1.356	1.387	0.094	1.28633	0.884	0.953	0.963	0.092	0.841333	1.474	1.627	1.442	0.093	1.42133	1.424	1.383	1.393	0.094	1.306	1.013	1.183	1.32	0.093	1.079	1.419	1.524	1.536
	16:15:12	1.463	1.363	1.613	0.094	1.38567	1.251	1.287	1.273	0.094	1.17633	0.76	0.756	0.768	0.094	0.667333	1.448	1.418	1.358	0.095	1.313	1.38	1.372	1.387	0.094	1.28567	0.885	0.955	0.965	0.092	0.843	1.473	1.647	1.445	0.093	1.42867	1.425	1.375	1.395	0.094	1.30433	1.006	1.179	1.36	0.093	1.08867	1.417	1.527	1.517
	16:30:12	1.463	1.361	1.628	0.094	1.39	1.253	1.287	1.274	0.094	1.17733	0.801	0.757	0.769	0.094	0.681667	1.448	1.411	1.359	0.095	1.311	1.367	1.358	1.389	0.094	1.27733	0.886	0.956	0.967	0.092	0.844333	1.471	1.665	1.452	0.093	1.43633	1.427	1.418	1.395	0.094	1.31933	1.003	1.186	1.409	0.093	1.10633	1.414	1.537	1.516
	16:45:12	1.463	1.352	1.645	0.094	1.39267	1.252	1.287	1.276	0.094	1.17767	0.896	0.76	0.77	0.094	0.714667	1.449	1.413	1.36	0.095	1.31233	1.373	1.372	1.389	0.094	1.284	0.885	0.957	0.967	0.092	0.844333	1.47	1.681	1.459	0.093	1.44367	1.427	1.465	1.396	0.094	1.33533	1.032	1.201	1.463	0.093	1.139	1.407	1.55	1.523
	17:00:12	1.463	1.362	1.659	0.094	1.40067	1.253	1.288	1.276	0.094	1.17833	0.939	0.762	0.768	0.094	0.729	1.449	1.433	1.36	0.095	1.319	1.392	1.355	1.39	0.094	1.285	0.886	0.958	0.968	0.092	0.845333	1.468	1.694	1.468	0.093	1.45033	1.428	1.484	1.396	0.094	1.342	1.105	1.224	1.52	0.093	1.19	1.4	1.565	1.533
	17:15:12	1.463	1.4	1.672	0.094	1.41767	1.253	1.287	1.277	0.094	1.17833	0.927	0.763	0.778	0.094	0.728667	1.449	1.463	1.361	0.095	1.32933	1.41	1.349	1.389	0.094	1.28867	0.887	0.959	0.969	0.092	0.846333	1.46	1.704	1.473	0.093	1.45267	1.427	1.488	1.396	0.094	1.343	1.193	1.255	1.578	0.093	1.249	1.408	1.582	1.545
	17:30:12	1.463	1.446	1.685	0.094	1.43733	1.254	1.286	1.277	0.094	1.17833	0.931	0.765	0.817	0.094	0.743667	1.449	1.488	1.362	0.095	1.338	1.428	1.345	1.39	0.094	1.29367	0.889	0.961	0.97	0.092	0.848	1.443	1.714	1.482	0.093	1.45333	1.429	1.49	1.396	0.094	1.34433	1.223	1.296	1.635	0.093	1.29167	1.439	1.599	1.56
	17:45:12	1.463	1.466	1.695	0.094	1.44733	1.255	1.282	1.278	0.094	1.17767	0.939	0.766	0.877	0.094	0.766667	1.449	1.497	1.361	0.095	1.34067	1.448	1.358	1.391	0.094	1.305	0.888	0.96	0.969	0.091	0.848	1.444	1.724	1.492	0.093	1.46033	1.429	1.495	1.395	0.094	1.34567	1.227	1.343	1.693	0.093	1.328	1.489	1.615	1.577
	18:00:12	1.463	1.463	1.704	0.094	1.44933	1.256	1.275	1.279	0.094	1.176	0.954	0.769	0.919	0.094	0.786667	1.45	1.5	1.36	0.095	1.34167	1.473	1.401	1.391	0.094	1.32767	0.888	0.962	0.97	0.092	0.848	1.484	1.732	1.503	0.093	1.48	1.429	1.503	1.394	0.094	1.348	1.244	1.398	1.746	0.093	1.36967	1.537	1.631	1.595
	18:15:12	1.462	1.462	1.711	0.094	1.451	1.256	1.271	1.28	0.095	1.174	0.971	0.771	0.92	0.094	0.793333	1.45	1.502	1.36	0.095	1.34233	1.501	1.445	1.391	0.094	1.35167	0.887	0.962	0.97	0.092	0.847667	1.524	1.738	1.514	0.093	1.499	1.429	1.515	1.388	0.094	1.35	1.275	1.456	1.797	0.093	1.41633	1.551	1.647	1.612
	18:30:12	1.462	1.469	1.719	0.094	1.456	1.256	1.277	1.28	0.094	1.177	0.996	0.772	0.919	0.094	0.801667	1.45	1.506	1.36	0.095	1.34367	1.529	1.458	1.391	0.094	1.36533	0.888	0.962	0.97	0.092	0.848	1.544	1.745	1.523	0.093	1.511	1.429	1.532	1.377	0.094	1.352	1.317	1.517	1.842	0.093	1.46567	1.543	1.66	1.629
	18:45:12	1.462	1.471	1.727	0.094	1.45933	1.256	1.304	1.281	0.094	1.18633	1.027	0.773	0.927	0.094	0.815	1.449	1.511	1.36	0.095	1.345	1.552	1.463	1.391	0.094	1.37467	0.89	0.962	0.968	0.092	0.848	1.546	1.75	1.532	0.093	1.51633	1.428	1.552	1.379	0.094	1.359	1.366	1.581	1.881	0.093	1.51633	1.538	1.673	1.646
	19:00:12	1.462	1.48	1.733	0.094	1.46433	1.256	1.338	1.281	0.094	1.19767	1.063	0.773	0.937	0.094	0.830333	1.449	1.518	1.359	0.095	1.347	1.568	1.484	1.39	0.094	1.38667	0.891	0.96	0.962	0.092	0.845667	1.546	1.753	1.54	0.093	1.52	1.429	1.576	1.412	0.094	1.37833	1.421	1.65	1.912	0.093	1.568	1.54	1.685	1.661
	19:15:12	1.462	1.494	1.74	0.094	1.47133	1.257	1.37	1.281	0.094	1.20867	1.103	0.774	0.952	0.094	0.849	1.45	1.525	1.357	0.095	1.349	1.579	1.497	1.388	0.094	1.394	0.89	0.957	0.958	0.092	0.843	1.546	1.756	1.547	0.093	1.52333	1.429	1.599	1.467	0.094	1.40433	1.478	1.712	1.937	0.093	1.616	1.546	1.696	1.675
	19:30:12	1.461	1.505	1.743	0.094	1.47567	1.258	1.376	1.282	0.094	1.21133	1.148	0.775	0.97	0.094	0.870333	1.449	1.532	1.353	0.095	1.34967	1.587	1.504	1.38	0.094	1.39633	0.89	0.952	0.981	0.092	0.849	1.549	1.758	1.554	0.093	1.52733	1.427	1.62	1.504	0.094	1.423	1.539	1.769	1.957	0.093	1.662	1.554	1.707	1.687
	19:45:12	1.46	1.525	1.75	0.094	1.48433	1.258	1.388	1.283	0.094	1.21567	1.194	0.776	0.991	0.094	0.893	1.45	1.542	1.343	0.095	1.35	1.591	1.518	1.363	0.094	1.39667	0.888	0.941	1.051	0.092	0.868	1.554	1.76	1.561	0.093	1.532	1.425	1.639	1.502	0.094	1.428	1.597	1.816	1.97	0.093	1.70133	1.563	1.718	1.698
	20:00:12	1.46	1.541	1.756	0.094	1.49167	1.259	1.404	1.283	0.094	1.22133	1.243	0.776	1.017	0.094	0.918	1.45	1.552	1.343	0.095	1.35333	1.592	1.532	1.382	0.094	1.408	0.888	0.942	1.153	0.092	0.902333	1.56	1.761	1.568	0.093	1.53667	1.423	1.653	1.498	0.094	1.43067	1.652	1.852	1.98	0.093	1.735	1.573	1.728	1.708
	20:15:12	1.459	1.553	1.762	0.094	1.49733	1.259	1.429	1.283	0.094	1.22967	1.297	0.777	1.048	0.094	0.946667	1.45	1.563	1.366	0.095	1.36467	1.588	1.544	1.453	0.094	1.43433	0.885	0.981	1.234	0.092	0.941333	1.566	1.763	1.574	0.093	1.54133	1.417	1.665	1.502	0.094	1.434	1.701	1.881	1.989	0.093	1.764	1.583	1.736	1.716
	20:30:12	1.459	1.566	1.768	0.094	1.50367	1.26	1.459	1.283	0.094	1.24	1.351	0.777	1.084	0.094	0.976667	1.45	1.575	1.405	0.095	1.38167	1.58	1.55	1.513	0.094	1.45367	0.88	1.051	1.255	0.092	0.97	1.573	1.763	1.579	0.093	1.54533	1.406	1.675	1.514	0.094	1.43767	1.744	1.902	1.998	0.093	1.78833	1.591	1.745	1.725
	20:45:12	1.459	1.577	1.773	0.094	1.509	1.259	1.486	1.284	0.094	1.249	1.405	0.776	1.126	0.094	1.00833	1.45	1.585	1.444	0.095	1.398	1.568	1.564	1.526	0.094	1.45867	0.868	1.134	1.269	0.092	0.998333	1.581	1.764	1.584	0.093	1.55	1.39	1.675	1.529	0.094	1.43733	1.786	1.923	2.005	0.093	1.81167	1.6	1.753	1.732
	21:00:12	1.458	1.585	1.779	0.094	1.51333	1.259	1.509	1.283	0.094	1.25633	1.455	0.771	1.171	0.094	1.03833	1.45	1.595	1.465	0.095	1.40833	1.556	1.575	1.525	0.094	1.458	0.868	1.217	1.292	0.092	1.03367	1.587	1.765	1.589	0.093	1.554	1.383	1.666	1.546	0.094	1.43767	1.822	1.953	2.011	0.093	1.83567	1.606	1.761	1.739
	21:15:12	1.456	1.594	1.784	0.094	1.51733	1.259	1.526	1.284	0.094	1.26233	1.504	0.764	1.219	0.094	1.06833	1.45	1.605	1.463	0.095	1.411	1.544	1.582	1.534	0.094	1.45933	0.905	1.292	1.318	0.092	1.07967	1.593	1.766	1.594	0.093	1.558	1.403	1.647	1.565	0.094	1.44433	1.858	1.966	2.018	0.093	1.85433	1.613	1.767	1.745
	21:30:12	1.454	1.604	1.79	0.094	1.522	1.259	1.537	1.284	0.095	1.265	1.552	0.789	1.27	0.094	1.10967	1.45	1.613	1.457	0.095	1.41167	1.532	1.591	1.548	0.094	1.463	0.99	1.347	1.351	0.092	1.13733	1.599	1.767	1.599	0.093	1.562	1.44	1.624	1.582	0.094	1.45467	1.897	1.982	2.03	0.093	1.87667	1.618	1.774	1.752
	21:45:12	1.45	1.611	1.794	0.094	1.52433	1.259	1.543	1.283	0.094	1.26767	1.598	0.859	1.322	0.094	1.16567	1.45	1.621	1.456	0.095	1.414	1.517	1.583	1.564	0.094	1.46067	1.095	1.4	1.388	0.092	1.20233	1.604	1.768	1.603	0.093	1.56533	1.473	1.607	1.599	0.094	1.46567	1.913	1.995	2.037	0.093	1.88867	1.624	1.78	1.758
	22:00:12	1.44	1.617	1.797	0.094	1.524	1.259	1.546	1.281	0.094	1.268	1.64	0.939	1.374	0.094	1.22367	1.451	1.628	1.456	0.095	1.41667	1.502	1.579	1.582	0.094	1.46033	1.19	1.449	1.433	0.092	1.26533	1.609	1.768	1.606	0.093	1.568	1.493	1.591	1.613	0.094	1.47167	1.924	2.005	2.043	0.093	1.89767	1.629	1.785	1.764
	22:15:12	1.429	1.625	1.799	0.094	1.52367	1.258	1.544	1.28	0.094	1.26667	1.681	1.008	1.425	0.094	1.27733	1.45	1.635	1.457	0.095	1.419	1.488	1.574	1.6	0.094	1.46	1.26	1.493	1.483	0.092	1.32	1.614	1.769	1.61	0.093	1.57133	1.505	1.577	1.622	0.094	1.474	1.936	2.019	2.048	0.093	1.908	1.633	1.789	1.769
	22:30:12	1.437	1.63	1.801	0.094	1.52867	1.258	1.538	1.272	0.094	1.262	1.724	1.056	1.474	0.094	1.324	1.45	1.641	1.46	0.095	1.422	1.473	1.567	1.619	0.094	1.459	1.314	1.536	1.537	0.091	1.37133	1.618	1.77	1.613	0.093	1.574	1.514	1.567	1.621	0.094	1.47333	1.946	2.03	2.054	0.093	1.917	1.636	1.794	1.775
	22:45:12	1.46	1.636	1.805	0.094	1.53967	1.256	1.535	1.26	0.094	1.25633	1.758	1.088	1.523	0.094	1.36233	1.45	1.645	1.463	0.095	1.42433	1.457	1.561	1.637	0.094	1.45767	1.366	1.589	1.598	0.092	1.42567	1.622	1.77	1.616	0.093	1.57633	1.52	1.557	1.613	0.094	1.46933	1.954	2.042	2.057	0.093	1.92467	1.639	1.798	1.781
	23:00:12	1.486	1.64	1.806	0.094	1.55	1.249	1.532	1.253	0.094	1.25067	1.786	1.122	1.568	0.094	1.398	1.45	1.65	1.465	0.095	1.42667	1.443	1.558	1.653	0.094	1.45733	1.419	1.641	1.652	0.091	1.47967	1.625	1.771	1.619	0.093	1.57867	1.526	1.547	1.603	0.094	1.46467	1.957	2.049	2.057	0.093	1.928	1.642	1.803	1.786
	23:15:12	1.503	1.644	1.808	0.094	1.55767	1.233	1.524	1.276	0.094	1.25033	1.804	1.16	1.611	0.094	1.431	1.45	1.655	1.468	0.095	1.42933	1.431	1.567	1.663	0.094	1.45967	1.474	1.686	1.696	0.092	1.52667	1.627	1.772	1.622	0.093	1.58067	1.523	1.538	1.594	0.094	1.45767	1.966	2.057	2.059	0.093	1.93433	1.644	1.807	1.792
	23:30:12	1.508	1.647	1.809	0.094	1.56067	1.232	1.516	1.323	0.094	1.263	1.821	1.201	1.651	0.094	1.46367	1.449	1.658	1.472	0.095	1.43133	1.423	1.566	1.656	0.094	1.45433	1.532	1.726	1.736	0.092	1.57267	1.631	1.772	1.624	0.093	1.58267	1.523	1.528	1.586	0.094	1.45167	1.982	2.065	2.062	0.093	1.94333	1.646	1.811	1.796
	23:45:12	1.505	1.651	1.809	0.094	1.561	1.271	1.506	1.365	0.094	1.28667	1.841	1.244	1.686	0.094	1.49633	1.449	1.66	1.474	0.095	1.43267	1.417	1.56	1.629	0.094	1.44133	1.588	1.764	1.773	0.092	1.61633	1.633	1.772	1.627	0.093	1.58433	1.52	1.525	1.578	0.094	1.447	1.992	2.075	2.065	0.093	1.951	1.649	1.815	1.801
	1 day, 0:00:12	1.501	1.65	1.81	0.094	1.55967	1.337	1.496	1.391	0.094	1.314	1.863	1.289	1.722	0.094	1.53067	1.448	1.663	1.477	0.095	1.43433	1.412	1.55	1.613	0.094	1.431	1.639	1.807	1.803	0.092	1.65767	1.636	1.773	1.629	0.093	1.58633	1.518	1.526	1.57	0.094	1.444	2.009	2.084	2.063	0.093	1.959	1.65	1.819	1.806
	1 day, 0:15:12	1.499	1.655	1.809	0.094	1.56033	1.397	1.485	1.405	0.094	1.335	1.878	1.338	1.754	0.094	1.56267	1.446	1.665	1.479	0.095	1.435	1.409	1.538	1.598	0.094	1.421	1.691	1.845	1.832	0.092	1.69733	1.638	1.772	1.632	0.093	1.58767	1.516	1.524	1.56	0.094	1.43933	2.015	2.091	2.062	0.093	1.963	1.652	1.823	1.81
	1 day, 0:30:12	1.497	1.657	1.809	0.094	1.56033	1.435	1.474	1.418	0.094	1.34833	1.889	1.385	1.782	0.094	1.59133	1.444	1.668	1.48	0.095	1.43567	1.407	1.527	1.584	0.094	1.412	1.74	1.883	1.855	0.092	1.734	1.64	1.772	1.634	0.093	1.589	1.515	1.52	1.551	0.094	1.43467	2.02	2.098	2.06	0.093	1.96633	1.653	1.827	1.814
	1 day, 0:45:12	1.497	1.658	1.81	0.094	1.561	1.46	1.465	1.44	0.094	1.361	1.901	1.433	1.807	0.094	1.61967	1.439	1.671	1.483	0.095	1.436	1.406	1.52	1.572	0.094	1.40533	1.787	1.913	1.875	0.092	1.76633	1.642	1.773	1.635	0.093	1.59033	1.512	1.52	1.541	0.094	1.43033	2.031	2.104	2.054	0.093	1.97	1.655	1.831	1.818
	1 day, 1:00:12	1.498	1.661	1.81	0.094	1.56233	1.486	1.46	1.464	0.094	1.376	1.911	1.479	1.822	0.094	1.64333	1.433	1.673	1.484	0.095	1.435	1.405	1.515	1.565	0.094	1.401	1.83	1.942	1.891	0.092	1.79567	1.644	1.773	1.638	0.093	1.592	1.51	1.518	1.532	0.094	1.426	2.036	2.111	2.047	0.093	1.97167	1.656	1.834	1.822
	1 day, 1:15:12	1.498	1.663	1.81	0.094	1.563	1.511	1.456	1.481	0.094	1.38867	1.92	1.522	1.833	0.094	1.66433	1.428	1.675	1.487	0.095	1.435	1.405	1.511	1.561	0.094	1.39833	1.871	1.97	1.89	0.092	1.81833	1.646	1.773	1.64	0.093	1.59333	1.509	1.515	1.527	0.094	1.423	2.045	2.114	2.042	0.093	1.974	1.658	1.838	1.825
	1 day, 1:30:12	1.499	1.666	1.81	0.094	1.56433	1.529	1.454	1.5	0.094	1.40033	1.926	1.56	1.846	0.094	1.68333	1.427	1.678	1.489	0.095	1.43633	1.404	1.509	1.557	0.094	1.396	1.906	1.998	1.887	0.092	1.83833	1.648	1.773	1.642	0.093	1.59467	1.507	1.513	1.523	0.094	1.42033	2.051	2.115	2.04	0.093	1.97567	1.659	1.841	1.829
	1 day, 1:45:12	1.499	1.668	1.81	0.094	1.565	1.541	1.452	1.51	0.094	1.407	1.934	1.604	1.874	0.094	1.71	1.433	1.68	1.491	0.095	1.43967	1.403	1.507	1.548	0.094	1.392	1.942	2.016	1.897	0.092	1.85967	1.651	1.773	1.643	0.093	1.596	1.504	1.511	1.524	0.094	1.419	2.056	2.12	2.038	0.093	1.97833	1.66	1.844	1.832
	1 day, 2:00:12	1.501	1.67	1.809	0.094	1.566	1.547	1.452	1.519	0.094	1.412	1.94	1.65	1.889	0.094	1.73233	1.445	1.683	1.493	0.095	1.44533	1.401	1.504	1.538	0.094	1.387	1.968	2.032	1.903	0.092	1.87567	1.652	1.772	1.644	0.093	1.59633	1.512	1.511	1.528	0.094	1.423	2.07	2.124	2.034	0.093	1.983	1.661	1.847	1.836
	1 day, 2:15:12	1.502	1.671	1.809	0.094	1.56667	1.548	1.454	1.522	0.094	1.414	1.948	1.689	1.894	0.094	1.74967	1.461	1.685	1.495	0.095	1.452	1.4	1.503	1.531	0.094	1.384	1.988	2.047	1.908	0.092	1.889	1.654	1.773	1.646	0.093	1.598	1.51	1.51	1.528	0.094	1.422	2.084	2.128	2.033	0.093	1.98867	1.662	1.85	1.838
	1 day, 2:30:12	1.503	1.673	1.809	0.094	1.56767	1.547	1.455	1.525	0.094	1.415	1.955	1.715	1.9	0.094	1.76267	1.478	1.688	1.498	0.095	1.45967	1.4	1.501	1.527	0.094	1.382	2.009	2.059	1.909	0.091	1.90133	1.655	1.772	1.647	0.093	1.59833	1.512	1.509	1.528	0.094	1.42233	2.094	2.134	2.029	0.093	1.99267	1.663	1.853	1.841
	1 day, 2:45:12	1.504	1.674	1.808	0.094	1.568	1.543	1.456	1.521	0.094	1.41267	1.96	1.742	1.907	0.094	1.77567	1.494	1.689	1.5	0.095	1.466	1.399	1.502	1.526	0.094	1.38167	2.025	2.065	1.91	0.092	1.908	1.657	1.772	1.648	0.093	1.59933	1.516	1.509	1.527	0.094	1.42333	2.1	2.136	2.026	0.093	1.99433	1.664	1.856	1.844
	1 day, 3:00:12	1.505	1.673	1.808	0.094	1.568	1.534	1.457	1.508	0.094	1.40567	1.967	1.764	1.917	0.094	1.78867	1.506	1.692	1.503	0.095	1.472	1.397	1.501	1.525	0.094	1.38033	2.041	2.067	1.899	0.092	1.91033	1.658	1.772	1.649	0.093	1.6	1.513	1.51	1.526	0.094	1.42233	2.11	2.137	2.025	0.093	1.99767	1.665	1.859	1.845
	1 day, 3:15:12	1.505	1.674	1.807	0.094	1.568	1.524	1.458	1.494	0.094	1.398	1.972	1.785	1.923	0.094	1.79933	1.514	1.693	1.505	0.095	1.47567	1.401	1.5	1.524	0.094	1.381	2.05	2.051	1.892	0.092	1.90567	1.659	1.772	1.651	0.093	1.601	1.51	1.51	1.525	0.094	1.421	2.108	2.137	2.022	0.093	1.996	1.666	1.861	1.847
	1 day, 3:30:12	1.506	1.679	1.807	0.094	1.57	1.517	1.459	1.481	0.094	1.39167	1.974	1.805	1.932	0.094	1.80967	1.517	1.695	1.507	0.095	1.478	1.397	1.5	1.522	0.094	1.379	2.057	2.009	1.894	0.091	1.89567	1.66	1.771	1.651	0.093	1.601	1.506	1.51	1.525	0.094	1.41967	2.111	2.138	2.017	0.093	1.99567	1.668	1.863	1.848
	1 day, 3:45:12	1.508	1.677	1.806	0.094	1.56967	1.509	1.46	1.471	0.094	1.386	1.976	1.816	1.937	0.094	1.81567	1.518	1.698	1.509	0.095	1.48	1.404	1.499	1.522	0.094	1.381	2.062	1.989	1.893	0.092	1.88933	1.662	1.772	1.653	0.093	1.60267	1.505	1.512	1.525	0.094	1.42	2.114	2.138	2.016	0.093	1.99633	1.669	1.866	1.849
	1 day, 4:00:12	1.509	1.68	1.805	0.094	1.57067	1.5	1.46	1.462	0.094	1.38	1.977	1.83	1.94	0.094	1.82167	1.518	1.699	1.512	0.095	1.48133	1.402	1.5	1.52	0.094	1.38	2.059	1.974	1.892	0.092	1.883	1.662	1.77	1.654	0.093	1.60233	1.502	1.512	1.525	0.094	1.419	2.122	2.133	2.012	0.093	1.996	1.669	1.868	1.849
	1 day, 4:15:12	1.509	1.682	1.804	0.094	1.571	1.491	1.46	1.457	0.094	1.37533	1.977	1.843	1.942	0.094	1.82667	1.517	1.701	1.514	0.095	1.48233	1.406	1.5	1.521	0.094	1.38167	2.05	1.966	1.891	0.092	1.877	1.663	1.771	1.654	0.093	1.603	1.5	1.514	1.525	0.094	1.419	2.131	2.132	2.007	0.093	1.997	1.669	1.871	1.853
	1 day, 4:30:12	1.51	1.683	1.804	0.094	1.57167	1.484	1.461	1.452	0.094	1.37167	1.979	1.847	1.944	0.094	1.82933	1.516	1.702	1.518	0.095	1.48367	1.411	1.498	1.521	0.094	1.38267	2.042	1.946	1.889	0.092	1.867	1.664	1.77	1.655	0.093	1.60333	1.498	1.515	1.525	0.094	1.41867	2.126	2.131	2.006	0.093	1.99467	1.67	1.873	1.853
	1 day, 4:45:12	1.511	1.682	1.803	0.094	1.57133	1.475	1.462	1.446	0.094	1.367	1.979	1.85	1.946	0.094	1.831	1.515	1.703	1.52	0.095	1.48433	1.415	1.498	1.522	0.094	1.38433	2.034	1.927	1.886	0.092	1.857	1.665	1.77	1.655	0.093	1.60367	1.497	1.517	1.525	0.094	1.419	2.117	2.128	2.008	0.093	1.99133	1.67	1.875	1.854
	1 day, 5:00:12	1.511	1.685	1.802	0.094	1.572	1.467	1.462	1.441	0.094	1.36267	1.979	1.858	1.947	0.094	1.834	1.515	1.705	1.522	0.095	1.48567	1.418	1.496	1.524	0.094	1.38533	2.027	1.899	1.884	0.092	1.84467	1.665	1.769	1.656	0.093	1.60367	1.497	1.52	1.525	0.094	1.42	2.116	2.125	2.003	0.093	1.98833	1.671	1.878	1.855
	1 day, 5:15:12	1.512	1.682	1.801	0.094	1.571	1.463	1.464	1.436	0.094	1.36033	1.977	1.862	1.949	0.094	1.83533	1.515	1.706	1.524	0.095	1.48667	1.422	1.497	1.524	0.094	1.387	2.016	1.885	1.881	0.092	1.83533	1.666	1.769	1.657	0.093	1.60433	1.497	1.521	1.524	0.094	1.42	2.116	2.119	1.998	0.093	1.98467	1.671	1.88	1.854
	1 day, 5:30:12	1.513	1.686	1.8	0.094	1.57233	1.461	1.466	1.435	0.094	1.36	1.977	1.862	1.95	0.094	1.83567	1.515	1.708	1.527	0.095	1.48833	1.425	1.497	1.525	0.094	1.38833	2	1.886	1.879	0.092	1.82967	1.666	1.768	1.657	0.093	1.604	1.497	1.524	1.523	0.094	1.42067	2.114	2.113	1.993	0.093	1.98033	1.672	1.881	1.851
	1 day, 5:45:12	1.513	1.688	1.8	0.094	1.573	1.459	1.467	1.436	0.095	1.359	1.976	1.864	1.951	0.094	1.83633	1.516	1.708	1.529	0.095	1.48933	1.429	1.499	1.525	0.094	1.39033	1.982	1.876	1.878	0.092	1.82	1.667	1.767	1.658	0.093	1.60433	1.497	1.527	1.524	0.094	1.422	2.111	2.104	1.988	0.093	1.97467	1.672	1.88	1.85
	1 day, 6:00:12	1.513	1.689	1.799	0.094	1.573	1.457	1.468	1.437	0.094	1.36	1.975	1.865	1.953	0.094	1.837	1.517	1.71	1.532	0.095	1.49133	1.431	1.499	1.524	0.094	1.39067	1.964	1.868	1.876	0.092	1.81067	1.667	1.766	1.658	0.093	1.604	1.497	1.531	1.523	0.094	1.423	2.111	2.095	1.982	0.093	1.96967	1.673	1.877	1.85
	1 day, 6:15:12	1.514	1.689	1.798	0.094	1.573	1.457	1.471	1.436	0.094	1.36067	1.974	1.866	1.953	0.094	1.837	1.518	1.711	1.535	0.095	1.493	1.435	1.501	1.524	0.094	1.39267	1.946	1.859	1.874	0.092	1.801	1.667	1.766	1.659	0.093	1.60433	1.498	1.535	1.524	0.094	1.425	2.11	2.084	1.978	0.093	1.96433	1.672	1.876	1.853
	1 day, 6:30:12	1.514	1.689	1.797	0.094	1.57267	1.454	1.473	1.437	0.094	1.36067	1.974	1.866	1.953	0.094	1.837	1.518	1.712	1.537	0.095	1.494	1.439	1.506	1.524	0.094	1.39567	1.938	1.786	1.872	0.092	1.77333	1.667	1.765	1.659	0.093	1.604	1.498	1.538	1.523	0.094	1.42567	2.101	2.073	1.976	0.093	1.957	1.673	1.877	1.853
	1 day, 6:45:12	1.514	1.689	1.797	0.094	1.57267	1.454	1.476	1.436	0.094	1.36133	1.973	1.865	1.953	0.094	1.83633	1.519	1.713	1.54	0.095	1.49567	1.443	1.506	1.525	0.094	1.39733	1.929	1.77	1.87	0.092	1.76433	1.667	1.765	1.66	0.093	1.60433	1.498	1.542	1.523	0.094	1.427	2.093	2.055	1.976	0.093	1.94833	1.673	1.877	1.854
	1 day, 7:00:12	1.515	1.69	1.796	0.094	1.573	1.454	1.478	1.438	0.094	1.36267	1.972	1.862	1.952	0.094	1.83467	1.52	1.714	1.542	0.095	1.497	1.446	1.509	1.526	0.094	1.39967	1.914	1.768	1.868	0.092	1.758	1.668	1.764	1.66	0.093	1.60433	1.5	1.544	1.525	0.094	1.429	2.086	2.04	1.977	0.093	1.94133	1.673	1.875	1.854
	1 day, 7:15:12	1.515	1.691	1.796	0.094	1.57333	1.453	1.479	1.439	0.094	1.363	1.971	1.862	1.951	0.094	1.834	1.521	1.714	1.543	0.095	1.49767	1.448	1.512	1.527	0.094	1.40167	1.9	1.757	1.866	0.092	1.749	1.668	1.764	1.661	0.093	1.60467	1.5	1.545	1.523	0.094	1.42867	2.077	2.03	1.979	0.093	1.93567	1.673	1.873	1.853
	1 day, 7:30:12	1.515	1.692	1.794	0.094	1.573	1.453	1.482	1.441	0.094	1.36467	1.97	1.861	1.948	0.094	1.83233	1.522	1.715	1.546	0.095	1.49933	1.451	1.519	1.528	0.094	1.40533	1.888	1.756	1.864	0.092	1.744	1.668	1.763	1.66	0.093	1.604	1.501	1.549	1.524	0.094	1.43067	2.069	2.023	1.985	0.093	1.93267	1.673	1.872	1.853
	1 day, 7:45:12	1.516	1.691	1.794	0.094	1.573	1.453	1.485	1.442	0.094	1.366	1.96	1.86	1.946	0.094	1.828	1.524	1.716	1.548	0.095	1.501	1.455	1.519	1.531	0.094	1.40767	1.88	1.756	1.861	0.092	1.74033	1.668	1.763	1.661	0.093	1.60433	1.503	1.552	1.524	0.094	1.43233	2.064	2.023	1.986	0.093	1.93133	1.673	1.869	1.852
	1 day, 8:00:12	1.516	1.692	1.792	0.094	1.57267	1.453	1.486	1.443	0.094	1.36667	1.931	1.859	1.944	0.094	1.81733	1.524	1.716	1.55	0.095	1.50167	1.458	1.521	1.536	0.094	1.411	1.869	1.743	1.861	0.091	1.73333	1.668	1.762	1.661	0.093	1.604	1.502	1.554	1.526	0.094	1.43333	2.055	2.02	1.988	0.093	1.928	1.673	1.868	1.851
	1 day, 8:15:12	1.517	1.693	1.792	0.094	1.57333	1.454	1.49	1.443	0.094	1.36833	1.922	1.858	1.942	0.094	1.81333	1.526	1.717	1.552	0.095	1.50333	1.457	1.525	1.541	0.094	1.41367	1.859	1.706	1.859	0.092	1.716	1.669	1.761	1.661	0.093	1.604	1.503	1.556	1.526	0.094	1.43433	2.045	2.011	1.986	0.093	1.921	1.673	1.866	1.851
	1 day, 8:30:12	1.518	1.692	1.792	0.094	1.57333	1.454	1.494	1.445	0.094	1.37033	1.916	1.858	1.939	0.094	1.81033	1.526	1.718	1.554	0.095	1.50433	1.46	1.532	1.543	0.094	1.41767	1.847	1.637	1.858	0.092	1.68867	1.669	1.76	1.662	0.093	1.604	1.504	1.565	1.526	0.094	1.43767	2.035	2.004	1.987	0.093	1.91567	1.673	1.865	1.851
	1 day, 8:45:12	1.518	1.692	1.791	0.094	1.573	1.456	1.498	1.445	0.094	1.37233	1.906	1.856	1.936	0.094	1.80533	1.527	1.718	1.555	0.095	1.505	1.464	1.536	1.546	0.094	1.42133	1.835	1.605	1.856	0.092	1.67333	1.669	1.759	1.661	0.093	1.60333	1.503	1.567	1.53	0.094	1.43933	2.025	1.998	1.987	0.093	1.91033	1.673	1.863	1.849
	1 day, 9:00:12	1.518	1.692	1.79	0.094	1.57267	1.459	1.499	1.446	0.094	1.374	1.902	1.855	1.929	0.094	1.80133	1.528	1.718	1.557	0.095	1.506	1.468	1.542	1.557	0.094	1.42833	1.816	1.577	1.855	0.092	1.65733	1.669	1.758	1.662	0.093	1.60333	1.504	1.569	1.532	0.094	1.441	2.021	1.993	1.986	0.093	1.907	1.673	1.861	1.85
	1 day, 9:15:12	1.518	1.693	1.789	0.094	1.57267	1.46	1.502	1.448	0.094	1.376	1.899	1.855	1.925	0.094	1.799	1.53	1.719	1.559	0.095	1.50767	1.468	1.54	1.563	0.094	1.42967	1.8	1.594	1.854	0.092	1.65733	1.669	1.758	1.662	0.093	1.60333	1.505	1.572	1.534	0.094	1.443	2.019	1.987	1.982	0.093	1.903	1.673	1.858	1.849
	1 day, 9:30:12	1.519	1.691	1.788	0.094	1.572	1.463	1.507	1.45	0.094	1.37933	1.893	1.854	1.916	0.094	1.79367	1.531	1.719	1.562	0.095	1.509	1.471	1.54	1.571	0.094	1.43333	1.797	1.61	1.853	0.092	1.66133	1.669	1.756	1.662	0.093	1.60267	1.506	1.575	1.536	0.094	1.445	2.014	1.986	1.978	0.093	1.89967	1.673	1.855	1.848
	1 day, 9:45:12	1.519	1.691	1.787	0.094	1.57167	1.465	1.509	1.453	0.094	1.38167	1.888	1.851	1.907	0.094	1.788	1.532	1.719	1.563	0.095	1.50967	1.479	1.546	1.566	0.094	1.43633	1.771	1.586	1.852	0.091	1.64533	1.668	1.755	1.662	0.093	1.602	1.508	1.575	1.537	0.094	1.446	2.008	1.986	1.974	0.093	1.89633	1.673	1.852	1.848
	1 day, 10:00:12	1.52	1.694	1.786	0.094	1.57267	1.468	1.512	1.458	0.094	1.38533	1.884	1.852	1.901	0.094	1.785	1.533	1.719	1.564	0.095	1.51033	1.482	1.546	1.574	0.094	1.44	1.812	1.582	1.851	0.092	1.65633	1.668	1.756	1.662	0.093	1.60233	1.508	1.576	1.539	0.094	1.447	2.004	1.983	1.971	0.093	1.893	1.673	1.854	1.848
	1 day, 10:15:12	1.52	1.693	1.785	0.094	1.572	1.47	1.515	1.462	0.094	1.38833	1.879	1.848	1.895	0.094	1.78	1.534	1.72	1.566	0.095	1.51167	1.484	1.551	1.561	0.094	1.438	1.802	1.582	1.849	0.092	1.65233	1.668	1.754	1.662	0.093	1.60167	1.513	1.579	1.54	0.094	1.45	2.004	1.981	1.971	0.093	1.89233	1.673	1.852	1.848
	1 day, 10:30:12	1.52	1.691	1.784	0.094	1.571	1.474	1.519	1.464	0.094	1.39167	1.874	1.848	1.888	0.094	1.776	1.536	1.72	1.569	0.095	1.51333	1.489	1.554	1.576	0.094	1.44567	1.792	1.569	1.848	0.092	1.64433	1.668	1.754	1.662	0.093	1.60167	1.514	1.58	1.541	0.094	1.451	2.004	1.978	1.971	0.093	1.89133	1.673	1.85	1.848
	1 day, 10:45:12	1.521	1.692	1.783	0.094	1.57133	1.48	1.524	1.466	0.094	1.396	1.869	1.846	1.883	0.094	1.772	1.536	1.72	1.571	0.095	1.514	1.457	1.564	1.593	0.094	1.444	1.774	1.592	1.847	0.092	1.64567	1.668	1.753	1.662	0.093	1.60133	1.516	1.587	1.545	0.094	1.45533	2.005	1.974	1.969	0.093	1.88967	1.673	1.848	1.848
	1 day, 11:00:12	1.521	1.692	1.782	0.094	1.571	1.484	1.525	1.473	0.094	1.4	1.866	1.829	1.879	0.094	1.764	1.536	1.72	1.572	0.095	1.51433	1.466	1.564	1.609	0.094	1.45233	1.763	1.605	1.846	0.091	1.647	1.668	1.752	1.662	0.093	1.601	1.517	1.586	1.544	0.094	1.455	1.996	1.973	1.967	0.093	1.88567	1.673	1.847	1.847
	1 day, 11:15:12	1.522	1.691	1.781	0.094	1.57067	1.487	1.526	1.477	0.094	1.40267	1.862	1.825	1.872	0.094	1.759	1.538	1.72	1.573	0.095	1.51533	1.469	1.579	1.586	0.094	1.45067	1.748	1.6	1.844	0.091	1.63967	1.668	1.751	1.662	0.093	1.60067	1.52	1.589	1.547	0.094	1.458	1.989	1.97	1.962	0.093	1.88067	1.673	1.845	1.846
	1 day, 11:30:12	1.522	1.691	1.78	0.094	1.57033	1.494	1.528	1.479	0.094	1.40633	1.86	1.829	1.86	0.094	1.75567	1.538	1.72	1.575	0.095	1.516	1.486	1.567	1.601	0.094	1.45733	1.736	1.598	1.843	0.092	1.63367	1.667	1.75	1.662	0.093	1.6	1.522	1.593	1.55	0.094	1.461	1.984	1.968	1.962	0.093	1.87833	1.672	1.844	1.846
	1 day, 11:45:12	1.522	1.692	1.779	0.094	1.57033	1.497	1.531	1.486	0.094	1.41067	1.86	1.829	1.855	0.094	1.754	1.539	1.72	1.576	0.095	1.51667	1.477	1.581	1.591	0.094	1.45567	1.722	1.601	1.842	0.092	1.62967	1.667	1.749	1.662	0.093	1.59967	1.524	1.595	1.552	0.094	1.463	1.979	1.965	1.96	0.093	1.875	1.672	1.843	1.846
	1 day, 12:00:12	1.522	1.692	1.778	0.094	1.57	1.502	1.534	1.488	0.094	1.414	1.86	1.828	1.852	0.094	1.75267	1.54	1.72	1.578	0.095	1.51767	1.467	1.588	1.595	0.094	1.456	1.725	1.591	1.841	0.092	1.627	1.667	1.748	1.662	0.093	1.59933	1.527	1.602	1.552	0.094	1.46633	1.974	1.963	1.957	0.093	1.87167	1.672	1.843	1.846
	1 day, 12:15:12	1.523	1.692	1.777	0.094	1.57	1.508	1.537	1.492	0.094	1.41833	1.857	1.826	1.849	0.094	1.75	1.541	1.72	1.578	0.095	1.518	1.491	1.587	1.579	0.094	1.45833	1.731	1.591	1.84	0.091	1.62967	1.667	1.747	1.662	0.093	1.599	1.53	1.595	1.555	0.094	1.466	1.966	1.962	1.956	0.093	1.86833	1.672	1.841	1.845
	1 day, 12:30:12	1.523	1.693	1.776	0.094	1.57	1.511	1.537	1.5	0.094	1.422	1.857	1.825	1.843	0.094	1.74767	1.542	1.72	1.579	0.095	1.51867	1.475	1.589	1.604	0.094	1.462	1.732	1.59	1.839	0.092	1.62833	1.667	1.747	1.662	0.093	1.599	1.535	1.599	1.559	0.094	1.47033	1.956	1.959	1.955	0.093	1.86367	1.671	1.84	1.844
	1 day, 12:45:12	1.524	1.693	1.775	0.094	1.57	1.515	1.539	1.504	0.094	1.42533	1.855	1.821	1.838	0.094	1.744	1.543	1.72	1.581	0.095	1.51967	1.476	1.6	1.6	0.094	1.46467	1.725	1.581	1.838	0.092	1.62267	1.667	1.746	1.661	0.093	1.59833	1.538	1.605	1.562	0.094	1.47433	1.944	1.958	1.953	0.093	1.85867	1.671	1.839	1.844
	1 day, 13:00:12	1.524	1.688	1.774	0.094	1.568	1.522	1.538	1.506	0.094	1.428	1.855	1.822	1.835	0.094	1.74333	1.544	1.72	1.581	0.095	1.52	1.48	1.616	1.594	0.094	1.46933	1.722	1.578	1.836	0.092	1.62	1.666	1.745	1.661	0.093	1.59767	1.539	1.603	1.564	0.094	1.47467	1.937	1.956	1.951	0.093	1.855	1.671	1.838	1.843
	1 day, 13:15:12	1.524	1.691	1.772	0.094	1.56833	1.527	1.541	1.507	0.094	1.431	1.854	1.822	1.831	0.094	1.74167	1.545	1.72	1.582	0.095	1.52067	1.484	1.616	1.603	0.094	1.47367	1.724	1.575	1.835	0.092	1.61933	1.666	1.744	1.661	0.093	1.59733	1.541	1.609	1.563	0.094	1.477	1.931	1.955	1.95	0.093	1.85233	1.67	1.837	1.843
	1 day, 13:30:12	1.525	1.69	1.771	0.094	1.568	1.532	1.543	1.506	0.094	1.433	1.852	1.821	1.84	0.094	1.74367	1.546	1.72	1.583	0.095	1.52133	1.484	1.622	1.603	0.094	1.47567	1.729	1.569	1.834	0.092	1.61867	1.666	1.743	1.661	0.093	1.597	1.543	1.615	1.572	0.094	1.48267	1.923	1.953	1.948	0.093	1.84833	1.67	1.836	1.842
	1 day, 13:45:12	1.524	1.692	1.77	0.094	1.568	1.535	1.546	1.506	0.094	1.435	1.851	1.82	1.856	0.094	1.74833	1.546	1.72	1.584	0.095	1.52167	1.476	1.621	1.571	0.094	1.462	1.729	1.569	1.832	0.092	1.618	1.665	1.742	1.661	0.093	1.59633	1.544	1.608	1.573	0.094	1.481	1.91	1.952	1.947	0.093	1.84333	1.67	1.835	1.841
	1 day, 14:00:12	1.525	1.69	1.769	0.094	1.56733	1.54	1.546	1.506	0.094	1.43667	1.849	1.819	1.856	0.094	1.74733	1.547	1.719	1.585	0.095	1.522	1.481	1.634	1.572	0.094	1.46833	1.724	1.564	1.831	0.092	1.61433	1.665	1.741	1.661	0.093	1.596	1.555	1.602	1.574	0.094	1.483	1.898	1.951	1.946	0.093	1.83867	1.669	1.834	1.841
	1 day, 14:15:12	1.525	1.688	1.768	0.094	1.56633	1.544	1.551	1.508	0.094	1.44033	1.847	1.817	1.854	0.094	1.74533	1.548	1.719	1.586	0.095	1.52267	1.473	1.64	1.588	0.094	1.473	1.722	1.557	1.829	0.092	1.61067	1.664	1.74	1.661	0.093	1.59533	1.558	1.601	1.58	0.094	1.48567	1.889	1.949	1.944	0.093	1.83433	1.669	1.833	1.84
	1 day, 14:30:12	1.525	1.687	1.767	0.094	1.56567	1.55	1.55	1.517	0.094	1.445	1.844	1.814	1.852	0.094	1.74267	1.548	1.718	1.587	0.095	1.52267	1.477	1.641	1.596	0.094	1.47733	1.724	1.554	1.828	0.091	1.611	1.664	1.739	1.66	0.093	1.59467	1.568	1.622	1.555	0.094	1.48767	1.888	1.948	1.943	0.093	1.83333	1.669	1.833	1.839
	1 day, 14:45:12	1.526	1.689	1.766	0.094	1.56633	1.554	1.555	1.532	0.094	1.453	1.842	1.815	1.853	0.094	1.74267	1.55	1.718	1.588	0.095	1.52367	1.478	1.647	1.587	0.094	1.47667	1.722	1.55	1.827	0.092	1.60767	1.664	1.738	1.661	0.093	1.59467	1.546	1.627	1.569	0.094	1.48667	1.893	1.947	1.942	0.093	1.83433	1.668	1.832	1.838
	1 day, 15:00:12	1.527	1.688	1.765	0.094	1.566	1.556	1.556	1.532	0.094	1.454	1.84	1.808	1.849	0.094	1.73833	1.55	1.718	1.59	0.094	1.52533	1.479	1.647	1.568	0.094	1.47067	1.718	1.547	1.826	0.092	1.605	1.663	1.737	1.66	0.093	1.59367	1.547	1.6	1.561	0.094	1.47533	1.879	1.945	1.941	0.093	1.82867	1.668	1.831	1.837
	1 day, 15:15:12	1.527	1.686	1.764	0.094	1.565	1.559	1.555	1.535	0.094	1.45567	1.838	1.803	1.849	0.094	1.736	1.551	1.718	1.59	0.095	1.52467	1.49	1.657	1.595	0.094	1.48667	1.705	1.545	1.825	0.092	1.59967	1.663	1.736	1.661	0.093	1.59367	1.56	1.63	1.561	0.094	1.48967	1.873	1.942	1.939	0.093	1.825	1.667	1.83	1.837
	1 day, 15:30:12	1.527	1.688	1.763	0.094	1.56533	1.566	1.559	1.544	0.094	1.46233	1.835	1.8	1.845	0.094	1.73267	1.552	1.717	1.591	0.094	1.526	1.472	1.661	1.578	0.094	1.47633	1.69	1.537	1.824	0.091	1.59267	1.662	1.735	1.66	0.093	1.59267	1.563	1.639	1.568	0.094	1.496	1.869	1.941	1.938	0.093	1.823	1.667	1.829	1.837
	1 day, 15:45:12	1.528	1.686	1.761	0.094	1.56433	1.57	1.532	1.541	0.094	1.45367	1.833	1.799	1.844	0.094	1.73133	1.553	1.717	1.591	0.095	1.52533	1.483	1.661	1.577	0.094	1.47967	1.669	1.54	1.823	0.092	1.58533	1.662	1.734	1.66	0.093	1.59233	1.557	1.607	1.573	0.094	1.485	1.867	1.94	1.937	0.093	1.82167	1.667	1.829	1.836
	1 day, 16:00:12	1.528	1.688	1.76	0.094	1.56467	1.577	1.534	1.543	0.094	1.45733	1.83	1.794	1.842	0.094	1.728	1.554	1.716	1.592	0.095	1.52567	1.464	1.662	1.567	0.094	1.47033	1.656	1.54	1.822	0.092	1.58067	1.662	1.733	1.66	0.093	1.592	1.568	1.636	1.571	0.094	1.49767	1.862	1.938	1.935	0.093	1.81867	1.666	1.827	1.835
	1 day, 16:15:12	1.528	1.687	1.759	0.094	1.564	1.581	1.53	1.549	0.094	1.45933	1.827	1.793	1.849	0.094	1.729	1.554	1.717	1.593	0.094	1.52733	1.477	1.661	1.57	0.094	1.47533	1.642	1.542	1.821	0.091	1.57733	1.661	1.731	1.66	0.093	1.591	1.562	1.636	1.564	0.094	1.49333	1.86	1.936	1.934	0.093	1.817	1.665	1.826	1.834
	1 day, 16:30:12	1.529	1.686	1.758	0.094	1.56367	1.585	1.535	1.55	0.094	1.46267	1.825	1.791	1.847	0.094	1.727	1.555	1.716	1.593	0.095	1.52633	1.473	1.667	1.567	0.094	1.475	1.627	1.545	1.82	0.092	1.572	1.661	1.731	1.66	0.093	1.591	1.571	1.636	1.562	0.094	1.49567	1.859	1.934	1.932	0.093	1.81533	1.666	1.826	1.834
	1 day, 16:45:12	1.529	1.685	1.757	0.094	1.563	1.589	1.546	1.557	0.094	1.47	1.821	1.788	1.844	0.094	1.72367	1.556	1.716	1.594	0.095	1.527	1.48	1.675	1.587	0.094	1.48667	1.601	1.537	1.819	0.092	1.56033	1.66	1.729	1.66	0.093	1.59	1.571	1.616	1.592	0.094	1.499	1.856	1.93	1.931	0.093	1.81267	1.665	1.825	1.833
	1 day, 17:00:12	1.529	1.685	1.756	0.094	1.56267	1.591	1.533	1.556	0.094	1.466	1.819	1.786	1.844	0.094	1.72233	1.557	1.716	1.595	0.095	1.52767	1.486	1.666	1.568	0.094	1.47933	1.578	1.541	1.819	0.092	1.554	1.66	1.728	1.659	0.093	1.58933	1.589	1.63	1.584	0.094	1.507	1.854	1.929	1.929	0.093	1.811	1.665	1.824	1.832
	1 day, 17:15:12	1.53	1.686	1.755	0.094	1.563	1.598	1.543	1.564	0.094	1.47433	1.817	1.784	1.842	0.094	1.72033	1.557	1.715	1.595	0.095	1.52733	1.476	1.665	1.568	0.094	1.47567	1.563	1.544	1.818	0.091	1.55067	1.659	1.727	1.659	0.093	1.58867	1.553	1.593	1.581	0.094	1.48167	1.851	1.927	1.928	0.093	1.809	1.664	1.823	1.831
	1 day, 17:30:12	1.53	1.685	1.753	0.094	1.562	1.598	1.54	1.565	0.094	1.47367	1.815	1.781	1.841	0.094	1.71833	1.558	1.714	1.596	0.095	1.52767	1.49	1.658	1.584	0.094	1.48333	1.552	1.543	1.817	0.092	1.54533	1.659	1.725	1.659	0.093	1.588	1.562	1.592	1.573	0.094	1.48167	1.848	1.926	1.927	0.093	1.80733	1.664	1.822	1.831
	1 day, 17:45:12	1.53	1.683	1.753	0.094	1.56133	1.605	1.544	1.572	0.094	1.47967	1.813	1.777	1.841	0.094	1.71633	1.559	1.714	1.596	0.095	1.528	1.472	1.659	1.564	0.094	1.471	1.533	1.55	1.816	0.091	1.542	1.659	1.724	1.659	0.093	1.58767	1.572	1.651	1.579	0.094	1.50667	1.845	1.926	1.925	0.093	1.80567	1.663	1.821	1.83
	1 day, 18:00:12	1.531	1.681	1.752	0.094	1.56067	1.605	1.545	1.577	0.094	1.48167	1.811	1.774	1.84	0.094	1.71433	1.56	1.713	1.596	0.095	1.528	1.48	1.659	1.567	0.094	1.47467	1.512	1.561	1.815	0.091	1.53833	1.658	1.723	1.658	0.093	1.58667	1.569	1.604	1.578	0.094	1.48967	1.843	1.925	1.924	0.093	1.80433	1.663	1.82	1.83
	1 day, 18:15:12	1.532	1.683	1.751	0.094	1.56133	1.609	1.552	1.566	0.094	1.48167	1.81	1.774	1.839	0.094	1.71367	1.56	1.713	1.597	0.095	1.52833	1.475	1.673	1.566	0.094	1.47733	1.503	1.552	1.815	0.092	1.53133	1.658	1.721	1.658	0.093	1.586	1.635	1.644	1.581	0.094	1.526	1.841	1.923	1.922	0.093	1.80233	1.662	1.819	1.829
	1 day, 18:30:12	1.532	1.683	1.749	0.094	1.56067	1.612	1.534	1.561	0.094	1.475	1.807	1.772	1.838	0.094	1.71167	1.561	1.712	1.597	0.094	1.52933	1.474	1.668	1.572	0.094	1.47733	1.495	1.555	1.813	0.091	1.53	1.657	1.72	1.657	0.093	1.585	1.538	1.647	1.595	0.094	1.49933	1.839	1.922	1.921	0.093	1.801	1.662	1.818	1.827
	1 day, 18:45:12	1.533	1.683	1.748	0.094	1.56067	1.614	1.547	1.583	0.094	1.48733	1.806	1.773	1.838	0.094	1.71167	1.561	1.711	1.598	0.094	1.52933	1.473	1.665	1.561	0.094	1.47233	1.487	1.56	1.813	0.091	1.529	1.657	1.719	1.657	0.093	1.58467	1.579	1.623	1.56	0.094	1.49333	1.837	1.923	1.92	0.093	1.80033	1.661	1.817	1.826
	1 day, 19:00:12	1.533	1.681	1.748	0.094	1.56	1.62	1.545	1.584	0.094	1.489	1.804	1.774	1.837	0.094	1.711	1.562	1.71	1.598	0.095	1.52833	1.491	1.663	1.562	0.094	1.478	1.482	1.555	1.812	0.092	1.52433	1.657	1.718	1.657	0.093	1.58433	1.567	1.636	1.568	0.094	1.49633	1.836	1.922	1.918	0.093	1.799	1.661	1.816	1.825
	1 day, 19:15:12	1.533	1.679	1.746	0.094	1.55867	1.618	1.544	1.599	0.094	1.493	1.803	1.772	1.835	0.094	1.70933	1.562	1.71	1.598	0.094	1.52933	1.488	1.667	1.56	0.094	1.47767	1.478	1.556	1.811	0.091	1.524	1.656	1.716	1.657	0.093	1.58333	1.57	1.618	1.56	0.094	1.48867	1.834	1.921	1.917	0.093	1.79767	1.661	1.816	1.824
	1 day, 19:30:12	1.534	1.68	1.745	0.094	1.559	1.626	1.542	1.597	0.094	1.49433	1.801	1.768	1.834	0.094	1.707	1.563	1.709	1.599	0.094	1.52967	1.5	1.625	1.603	0.094	1.482	1.476	1.56	1.81	0.092	1.52333	1.656	1.715	1.656	0.093	1.58267	1.605	1.679	1.576	0.094	1.526	1.832	1.92	1.915	0.093	1.796	1.66	1.815	1.823
	1 day, 19:45:12	1.534	1.681	1.744	0.094	1.559	1.623	1.548	1.602	0.094	1.497	1.8	1.768	1.834	0.094	1.70667	1.563	1.709	1.599	0.095	1.52867	1.478	1.681	1.571	0.094	1.48267	1.471	1.551	1.81	0.092	1.51867	1.655	1.714	1.657	0.093	1.58233	1.598	1.618	1.571	0.094	1.50167	1.83	1.92	1.915	0.093	1.79533	1.659	1.814	1.822
	1 day, 20:00:12	1.535	1.679	1.744	0.094	1.55867	1.63	1.545	1.604	0.094	1.499	1.799	1.77	1.833	0.094	1.70667	1.564	1.708	1.6	0.095	1.529	1.487	1.665	1.571	0.094	1.48033	1.469	1.547	1.808	0.092	1.516	1.654	1.713	1.657	0.093	1.58167	1.566	1.644	1.556	0.094	1.49467	1.829	1.918	1.913	0.093	1.79367	1.659	1.813	1.82
	1 day, 20:15:12	1.535	1.681	1.742	0.094	1.55867	1.631	1.548	1.598	0.094	1.49833	1.797	1.768	1.832	0.094	1.705	1.565	1.707	1.599	0.094	1.52967	1.474	1.656	1.565	0.094	1.471	1.46	1.541	1.808	0.092	1.511	1.654	1.711	1.657	0.093	1.581	1.585	1.568	1.573	0.094	1.48133	1.827	1.917	1.912	0.093	1.79233	1.658	1.812	1.819
	1 day, 20:30:12	1.536	1.679	1.741	0.094	1.558	1.635	1.546	1.591	0.094	1.49667	1.796	1.769	1.831	0.094	1.70467	1.565	1.706	1.599	0.095	1.52833	1.482	1.667	1.568	0.094	1.47833	1.445	1.537	1.807	0.092	1.50433	1.653	1.71	1.656	0.093	1.58	1.611	1.597	1.585	0.094	1.50367	1.825	1.917	1.911	0.093	1.79133	1.658	1.812	1.817
	1 day, 20:45:12	1.537	1.677	1.74	0.094	1.55733	1.633	1.543	1.594	0.094	1.496	1.795	1.77	1.83	0.094	1.70433	1.566	1.706	1.6	0.095	1.529	1.48	1.629	1.571	0.094	1.466	1.439	1.537	1.806	0.091	1.503	1.653	1.709	1.656	0.093	1.57967	1.579	1.578	1.597	0.094	1.49067	1.824	1.916	1.91	0.093	1.79033	1.657	1.811	1.817
	1 day, 21:00:12	1.538	1.679	1.739	0.094	1.558	1.638	1.556	1.599	0.094	1.50367	1.794	1.77	1.827	0.094	1.703	1.566	1.705	1.601	0.095	1.529	1.476	1.674	1.583	0.094	1.48367	1.436	1.54	1.806	0.092	1.502	1.652	1.707	1.656	0.093	1.57867	1.554	1.641	1.579	0.094	1.49733	1.822	1.915	1.909	0.093	1.789	1.657	1.81	1.815
	1 day, 21:15:12	1.538	1.675	1.738	0.094	1.55633	1.638	1.558	1.605	0.094	1.50633	1.792	1.77	1.825	0.094	1.70167	1.566	1.704	1.6	0.095	1.52833	1.484	1.604	1.564	0.094	1.45667	1.433	1.541	1.805	0.091	1.502	1.652	1.706	1.656	0.093	1.57833	1.567	1.641	1.59	0.094	1.50533	1.821	1.915	1.908	0.093	1.78833	1.656	1.809	1.813
	1 day, 21:30:12	1.539	1.675	1.737	0.094	1.55633	1.644	1.546	1.607	0.094	1.505	1.791	1.769	1.824	0.094	1.70067	1.567	1.704	1.601	0.095	1.529	1.48	1.669	1.571	0.094	1.47933	1.432	1.541	1.804	0.092	1.50033	1.651	1.705	1.655	0.093	1.57733	1.545	1.643	1.538	0.094	1.48133	1.82	1.914	1.907	0.093	1.78733	1.655	1.809	1.812
	1 day, 21:45:12	1.539	1.677	1.736	0.094	1.55667	1.646	1.544	1.612	0.094	1.50667	1.789	1.764	1.822	0.094	1.69767	1.567	1.703	1.601	0.094	1.52967	1.5	1.657	1.562	0.094	1.479	1.433	1.541	1.803	0.091	1.50133	1.651	1.704	1.655	0.093	1.577	1.545	1.647	1.579	0.094	1.49633	1.819	1.913	1.905	0.093	1.786	1.654	1.808	1.812
	1 day, 22:00:12	1.54	1.676	1.735	0.094	1.55633	1.648	1.551	1.626	0.094	1.51433	1.788	1.766	1.821	0.094	1.69767	1.567	1.703	1.602	0.094	1.53	1.476	1.63	1.591	0.094	1.47167	1.433	1.544	1.802	0.091	1.502	1.651	1.702	1.655	0.093	1.57633	1.551	1.639	1.576	0.094	1.49467	1.817	1.913	1.904	0.093	1.785	1.654	1.807	1.811
	1 day, 22:15:12	1.54	1.676	1.734	0.094	1.556	1.651	1.545	1.616	0.094	1.51	1.788	1.766	1.82	0.094	1.69733	1.567	1.702	1.602	0.095	1.52867	1.487	1.64	1.567	0.094	1.47067	1.432	1.544	1.801	0.091	1.50133	1.65	1.701	1.655	0.093	1.57567	1.605	1.609	1.585	0.094	1.50567	1.816	1.911	1.903	0.093	1.78367	1.653	1.806	1.81
	1 day, 22:30:12	1.541	1.674	1.733	0.094	1.55533	1.645	1.548	1.586	0.094	1.499	1.787	1.767	1.819	0.094	1.697	1.568	1.701	1.602	0.095	1.52867	1.484	1.64	1.563	0.094	1.46833	1.434	1.547	1.8	0.091	1.50267	1.649	1.7	1.654	0.093	1.57467	1.54	1.663	1.545	0.094	1.48867	1.815	1.911	1.901	0.093	1.78267	1.653	1.805	1.808
	1 day, 22:45:12	1.542	1.674	1.732	0.094	1.55533	1.655	1.545	1.603	0.094	1.507	1.785	1.768	1.817	0.094	1.696	1.569	1.7	1.602	0.095	1.52867	1.478	1.637	1.56	0.094	1.46433	1.437	1.548	1.799	0.092	1.50267	1.649	1.698	1.654	0.093	1.574	1.59	1.674	1.57	0.094	1.51733	1.813	1.91	1.9	0.093	1.78133	1.653	1.805	1.807
	1 day, 23:00:12	1.542	1.673	1.731	0.094	1.55467	1.644	1.556	1.606	0.094	1.508	1.784	1.769	1.816	0.093	1.69667	1.569	1.699	1.603	0.094	1.52967	1.486	1.672	1.57	0.094	1.482	1.438	1.547	1.798	0.091	1.50333	1.648	1.697	1.654	0.093	1.57333	1.6	1.654	1.562	0.094	1.51133	1.812	1.909	1.898	0.093	1.78	1.652	1.804	1.806
	1 day, 23:15:12	1.542	1.67	1.73	0.094	1.55333	1.656	1.55	1.617	0.094	1.51367	1.783	1.771	1.815	0.094	1.69567	1.569	1.699	1.603	0.095	1.52867	1.485	1.637	1.562	0.094	1.46733	1.44	1.558	1.797	0.092	1.50633	1.647	1.696	1.654	0.093	1.57267	1.592	1.668	1.587	0.094	1.52167	1.811	1.908	1.897	0.093	1.779	1.651	1.804	1.805
	1 day, 23:30:12	1.543	1.672	1.729	0.094	1.554	1.644	1.546	1.605	0.094	1.50433	1.782	1.768	1.814	0.094	1.694	1.57	1.698	1.603	0.095	1.52867	1.508	1.628	1.563	0.094	1.47233	1.44	1.563	1.795	0.091	1.50833	1.647	1.694	1.653	0.093	1.57167	1.558	1.656	1.587	0.094	1.50633	1.81	1.908	1.895	0.093	1.778	1.65	1.802	1.804
	1 day, 23:45:12	1.543	1.67	1.728	0.094	1.553	1.653	1.549	1.617	0.094	1.51233	1.781	1.766	1.813	0.094	1.69267	1.571	1.698	1.604	0.095	1.52933	1.495	1.615	1.561	0.094	1.463	1.44	1.567	1.794	0.092	1.50833	1.646	1.693	1.653	0.093	1.571	1.545	1.673	1.573	0.094	1.503	1.808	1.907	1.893	0.093	1.77633	1.65	1.802	1.804
	2 days, 0:00:12	1.543	1.669	1.727	0.094	1.55233	1.647	1.547	1.609	0.094	1.507	1.78	1.77	1.812	0.094	1.69333	1.571	1.696	1.604	0.095	1.52867	1.494	1.616	1.569	0.094	1.46567	1.442	1.573	1.792	0.092	1.51033	1.646	1.692	1.653	0.093	1.57067	1.602	1.653	1.59	0.094	1.521	1.807	1.906	1.892	0.093	1.77533	1.649	1.801	1.803
	2 days, 0:15:12	1.543	1.672	1.726	0.094	1.553	1.654	1.549	1.615	0.094	1.512	1.779	1.766	1.81	0.094	1.691	1.571	1.696	1.603	0.094	1.52933	1.491	1.608	1.563	0.094	1.46	1.443	1.576	1.791	0.091	1.51233	1.645	1.69	1.653	0.093	1.56967	1.573	1.68	1.558	0.094	1.50967	1.806	1.905	1.89	0.093	1.774	1.648	1.8	1.802
	2 days, 0:30:12	1.544	1.67	1.725	0.094	1.55233	1.651	1.548	1.618	0.094	1.51167	1.778	1.758	1.809	0.094	1.68767	1.572	1.695	1.604	0.095	1.52867	1.49	1.647	1.57	0.094	1.475	1.443	1.58	1.79	0.092	1.51233	1.644	1.688	1.653	0.093	1.56867	1.584	1.697	1.585	0.094	1.528	1.804	1.904	1.888	0.093	1.77233	1.647	1.8	1.801
	2 days, 0:45:12	1.544	1.67	1.724	0.094	1.552	1.654	1.545	1.613	0.094	1.51	1.777	1.755	1.807	0.094	1.68567	1.572	1.694	1.604	0.095	1.52833	1.497	1.594	1.599	0.094	1.46933	1.444	1.583	1.788	0.092	1.513	1.644	1.687	1.652	0.093	1.568	1.579	1.677	1.546	0.094	1.50667	1.804	1.904	1.886	0.093	1.77167	1.646	1.799	1.8
	2 days, 1:00:12	1.545	1.669	1.723	0.094	1.55167	1.659	1.557	1.611	0.094	1.515	1.776	1.755	1.805	0.094	1.68467	1.573	1.693	1.604	0.095	1.52833	1.548	1.596	1.595	0.094	1.48567	1.445	1.586	1.787	0.092	1.514	1.644	1.686	1.652	0.093	1.56767	1.567	1.677	1.576	0.094	1.51267	1.802	1.903	1.885	0.093	1.77033	1.646	1.798	1.8
	00:00:00
	00:00:00
	00:00:00
	00:00:00
	00:00:00
	00:00:00
	00:00:00
	00:00:00
	00:00:00
	00:00:00
	00:00:00
	00:00:00
	00:00:00
	00:00:00
	00:00:00
	00:00:00
	00:00:00
	00:00:00
	00:00:00
	00:00:00
	00:00:00
	00:00:00
	00:00:00
	00:00:00
	00:00:00
	00:00:00
	00:00:00
	00:00:00
	00:00:00
	00:00:00
	00:00:00
	00:00:00
	00:00:00
	00:00:00
	00:00:00
	00:00:00
	00:00:00
	00:00:00
	00:00:00
	00:00:00
	00:00:00
	00:00:00
	00:00:00
	00:00:00
	00:00:00
	00:00:00
	00:00:00
	00:00:00
	00:00:00
	00:00:00
	00:00:00
	00:00:00
	00:00:00
	00:00:00
	00:00:00
	00:00:00
	00:00:00
	00:00:00
	00:00:00
	00:00:00
	00:00:00
	00:00:00
	00:00:00
	00:00:00
	00:00:00
	00:00:00
	00:00:00
	00:00:00
	00:00:00
	00:00:00
	00:00:00
	00:00:00
	00:00:00
	00:00:00
	00:00:00
	00:00:00
	00:00:00
	00:00:00
	00:00:00
	00:00:00
	00:00:00
	00:00:00
	00:00:00
	00:00:00
	00:00:00
	00:00:00
	00:00:00
	00:00:00
	00:00:00
	00:00:00
	00:00:00
	00:00:00
Results
		2	3	4	5		6	7	8	9		10	11	12
	A	3.799	3.742	-2.339	3.555		3.471	3.394	-2.431	3.557		4.553	3.437	-2.111	Max V [600]
		1	1	0.497	1		1	1	0.501	1		0.994	1	0.5	R-Squared [600]
		08:30:12	08:30:12	00:30:12	07:45:12		06:45:12	07:00:12	00:30:12	20:30:12		22:00:12	21:45:12	00:30:12	t at Max V [600]
		06:38:11	06:31:22	?????	05:54:19		05:19:12	05:22:35	?????	15:49:32		19:45:45	16:50:43	?????	Lagtime [600]
	B	3.869	3.508	-3.399	3.655		3.703	3.512	-2.999	6.081		5.263	4.872	-2.439	Max V [600]
		1	1	0.619	1		1	1	0.571	0.996		0.999	0.967	0.5	R-Squared [600]
		08:30:12	08:45:12	00:30:12	07:15:12		06:45:12	06:45:12	00:30:12	21:45:12		20:45:12	20:00:12	00:30:12	t at Max V [600]
		06:43:43	06:45:37	?????	05:41:05		05:06:08	04:53:35	?????	19:51:44		18:19:18	17:22:02	?????	Lagtime [600]
	C	3.93	4.094	-3.441	4.103		3.797	3.895	-3.496	4		4.301	3.971	-2.491	Max V [600]
		1	1	0.72	1		1	1	0.719	0.97		1	0.916	0.501	R-Squared [600]
		08:30:12	08:15:12	00:30:12	07:30:12		07:15:12	06:45:12	00:30:12	17:00:12		18:45:12	14:30:12	00:30:12	t at Max V [600]
		06:20:04	06:31:20	?????	05:39:17		05:26:32	05:23:51	?????	13:56:23		14:04:20	11:04:32	?????	Lagtime [600]
	D	3.942	3.709	-3.428	3.471		3.463	3.851	-2.715	3.859		4.071	3.979	-2.875	Max V [600]
		0.999	1	0.701	1		1	1	0.506	1		1	1	0.501	R-Squared [600]
		08:30:12	08:15:12	00:30:12	07:45:12		07:45:12	07:30:12	00:30:12	07:15:12		07:15:12	07:30:12	00:30:12	t at Max V [600]
		06:40:32	06:19:40	?????	05:40:14		05:44:41	05:32:52	?????	05:22:49		05:24:33	05:10:35	?????	Lagtime [600]
	E	3.01	3.479	-2.567	0.006		-0.01	-0.006	0.005	-0.009		0.005	-0.008	-0.008	Max V [600]
		0.99	0.994	0.477	0.75		0.84	0.547	0.942	0.681		0.727	0.766	0.679	R-Squared [600]
		23:45:12	21:30:12	00:30:12	06:45:12		00:30:12	00:30:12	1 day, 16:30:12	00:30:12		1 day, 10:15:12	00:30:12	00:30:12	t at Max V [600]
		20:05:40	18:27:12	?????	07:38:32		?????	?????	1 day, 16:17:21	?????		1 day, 11:26:27	?????	?????	Lagtime [600]
	F	3.523	3.295	-2.926	-0.019		-0.008	-0.005	-0.006	-0.007		-0.009	-0.02	-0.011	Max V [600]
		0.977	1	0.499	0.48		0.75	0.533	0.92	0.893		0.768	0.551	0.821	R-Squared [600]
		20:15:12	19:45:12	00:30:12	00:30:12		00:30:12	00:30:12	1 day, 14:00:12	00:30:12		00:30:12	00:30:12	00:30:12	t at Max V [600]
		16:27:15	12:56:33	?????	?????		?????	?????	1 day, 12:56:52	?????		?????	?????	?????	Lagtime [600]
	G	3.865	4.05	-2.579	-0.006		-0.009	-0.007	-0.006	-0.006		-0.007	-0.015	-0.007	Max V [600]
		0.909	0.955	0.5	0.614		0.681	0.581	0.321	0.75		0.658	0.568	0.472	R-Squared [600]
		12:30:12	15:15:12	00:30:12	01:30:12		00:30:12	00:30:12	00:30:12	00:30:12		00:30:12	00:30:12	00:30:12	t at Max V [600]
		08:46:19	11:27:37	?????	00:50:12		?????	?????	?????	?????		?????	?????	?????	Lagtime [600]
	H	3.865	3.815	-2.447	-0.009		-0.006	-0.009	-0.008	-0.007		-0.007	0.006	0.005	Max V [600]
		1	1	0.502	0.925		0.88	0.731	0.655	0.676		0.714	0.75	0.942	R-Squared [600]
		08:15:12	07:45:12	00:30:12	00:30:12		00:30:12	00:30:12	00:30:12	00:30:12		00:30:12	1 day, 10:15:12	13:30:12	t at Max V [600]
		06:18:34	06:05:27	?????	?????		?????	?????	?????	?????		?????	1 day, 11:08:32	14:43:03	Lagtime [600]
[truncated: 32 more columns]
