# Supplementary material for: Bacterial–fungal interactions in the neonatal gut influence asthma outcomes later in life
Source: eLife. 2021 Apr 20;10:e67740. doi: 10.7554/eLife.67740 (PMC8075585; doi:10.7554/eLife.67740)
Supplement: Figure 4—source data 8. [file elife-67740-fig4-data8.xlsx]

## Sheet: Sheet1
Pichia Revisions Adherence Assays
Assay #1
Saturday, August 1 - S/O Pichia
Sunday, August 2 - 48hr liquid culture
Tuesday, August 4 - 24 hr culture conditions
Wednesday, August 5 - adherence assay
Conditions:
YPD only
Acetate 150 umol/ml
Butyrate 30 umol/ml
Propionate 30 umol/ml
Tauroursodeoxycholate (Low) - 10
Tauroursodeoxycholate (High) - 50
Sodium glycodeoxycholic acid (Low) - 10
Sodium glycodeoxycholic acid (High) - 50
Isovaleric acid 30mM
Biotin 20mg/L
Setting up 2 separate plates (2 different passages, synched) to 'infect' with 2 different Pichia colonies (2 biological replicates)
Issue: cells seeded into 6 well plates instead of 12 well plates!
Solution? Trying to replicate same surface area:volume ratio as the 12 well plates (2.5ml per well)
*only enough wells now for one well per condition… still, should give us an idea of which conditions worked/didn't
Inoculum Plate Counts
Sample	Rep 1	Rep 2	Average	Dilution	Cells/ml
YPD Inoc 1	73	59	66	100	660000
Acetate Inoc 1	52	52	52	100	520000
Butyrate Inoc 1	29	27	28	100	280000
Propionate Inoc 1	21	27	24	100	240000
Tauro Low Inoc 1	64	51	57.5	100	575000
Tauro High Inoc 1	38	29	33.5	100	335000
S. Glyc Low Inoc 1	8	9	8.5	100	85000
S. Glyc High Inoc 1	9	11	10	100	100000
Isovaleric Inoc 1	15	11	13	100	130000
Biotin Inoc 1	46	51	48.5	100	485000
YPD Inoc 2	36	33	34.5	100	345000
Acetate Inoc 2	44	33	38.5	100	385000
Butyrate Inoc 2	14	21	17.5	100	175000
Propionate Inoc 2	19	7	13	100	130000
Tauro Low Inoc 2	34	37	35.5	100	355000
Tauro High Inoc 2	28	32	30	100	300000
S. Glyc Low Inoc 2	34	28	31	10	31000
S. Glyc High Inoc 2	49	44	46.5	10	46500
Isovaleric Inoc 2	38	33	35.5	10	35500
Biotin Inoc 2	15	9	12	100	120000
Adherent Plate Counts
Sample	Rep 1	Rep 2	Average	Dilution	Cells/ml
YPD 1	43	48	45.5	10	45500
Acetate 1	13	12	12.5	10	12500
Butyrate 1	19	13	16	10	16000
Propionate 1	16	27	21.5	10	21500
Tauro Low 1	26	29	27.5	10	27500
Tauro High 1	25	17	21	10	21000
S. Glyc Low 1	31	39	35	10	35000
S. Glyc High 1	22	26	24	10	24000
Isovaleric 1	8	13	10.5	10	10500
Biotin 1	45	48	46.5	10	46500
YPD 2	54	54	54	10	54000
Acetate 2	26	17	21.5	10	21500
Butyrate 2	35	36	35.5	10	35500
Propionate 2	29	21	25	10	25000
Tauro Low 2	33	44	38.5	10	38500
Tauro High 2	27	36	31.5	10	31500
S. Glyc Low 2	28	32	30	10	30000
S. Glyc High 2	29	38	33.5	10	33500
Isovaleric 2	30	27	28.5	10	28500
Biotin 2	27	44	35.5	10	35500
