# Supplementary material for: Bacterial–fungal interactions in the neonatal gut influence asthma outcomes later in life
Source: eLife. 2021 Apr 20;10:e67740. doi: 10.7554/eLife.67740 (PMC8075585; doi:10.7554/eLife.67740)
Supplement: Figure 4—source data 9. [file elife-67740-fig4-data9.xlsx]

## Sheet: Sheet1
Pichia Revisions Adherence Assays
Assay #1
Saturday, August 8 - S/O Pichia
Sunday, August 9 - 48hr liquid culture
Tuesday, August 11 - 24 hr culture conditions
Wednesday, August 12 - adherence assay
Conditions:
YPD only
Acetate 150 umol/ml
Butyrate 30 umol/ml
Propionate 30 umol/ml
Biotin 20mg/L
Setting up 2 separate plates (2 different passages, synched) to 'infect' with 2 different Pichia colonies (2 biological replicates)
Inoculum Plate Counts
Sample	Rep 1	Rep 2	Average	Dilution	Cells/ml
YPD Inoc 1	18	14	16	1000	1600000
Acetate Inoc 1	55	44	49.5	100	495000
Butyrate Inoc 1	8	5	6.5	1000	650000
Propionate Inoc 1	13	10	11.5	1000	1150000
Biotin Inoc 1	57	60	58.5	100	585000
YPD Inoc 2	57	62	59.5	100	595000
Acetate Inoc 2	8	8	8	1000	800000
Butyrate Inoc 2	70	44	57	100	570000
Propionate Inoc 2	54	50	52	100	520000
Biotin Inoc 2	8	9	8.5	1000	850000
Adherent Plate Counts
Sample	Rep 1	Rep 2	Average	Dilution	Cells/ml	Average
YPD 1_1	28	25	26.5	10	26500	37333.3
YPD 1_2	54	49	51.5	10	51500
YPD 1_3	36	32	34	10	34000
Acetate 1_1	23	18	20.5	10	20500	16666.7
Acetate 1_2	21	13	17	10	17000
Acetate 1_3	12	13	12.5	10	12500
Butyrate 1_1	35	28	31.5	10	31500	23666.7
Butyrate 1_2	27	16	21.5	10	21500
Butyrate 1_3	17	19	18	10	18000
Propionate 1_1	36	44	40	10	40000	35833.3
Propionate 1_2	35	40	37.5	10	37500
Propionate 1_3	30	30	30	10	30000
Biotin 1_1	50	39	44.5	10	44500	38000
Biotin 1_2	38	35	36.5	10	36500
Biotin 1_3	31	35	33	10	33000
YPD 2_1	45	42	43.5	10	43500	32833.3
YPD 2_2	34	25	29.5	10	29500
YPD 2_3	20	31	25.5	10	25500
Acetate 2_1	17	22	19.5	10	19500	14000
Acetate 2_2	15	9	12	10	12000
Acetate 2_3	10	11	10.5	10	10500
Butyrate 2_1	31	29	30	10	30000	24333.3
Butyrate 2_2	31	19	25	10	25000
Butyrate 2_3	17	19	18	10	18000
Propionate 2_1	23	41	32	10	32000	28666.7
Propionate 2_2	27	27	27	10	27000
Propionate 2_3	21	33	27	10	27000
Biotin 2_1	19	24	21.5	10	21500	37333.3
Biotin 2_2	42	39	40.5	10	40500
Biotin 2_3	48	52	50	10	50000
