# Supplementary figures and images for: Bacterial–fungal interactions in the neonatal gut influence asthma outcomes later in life
Source: eLife journal article supplement (doi:10.7554/elife.67740), 2021-04-19

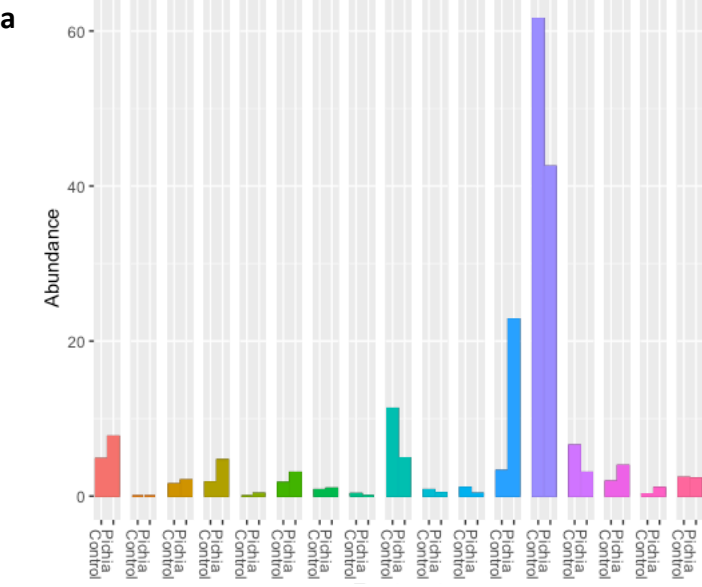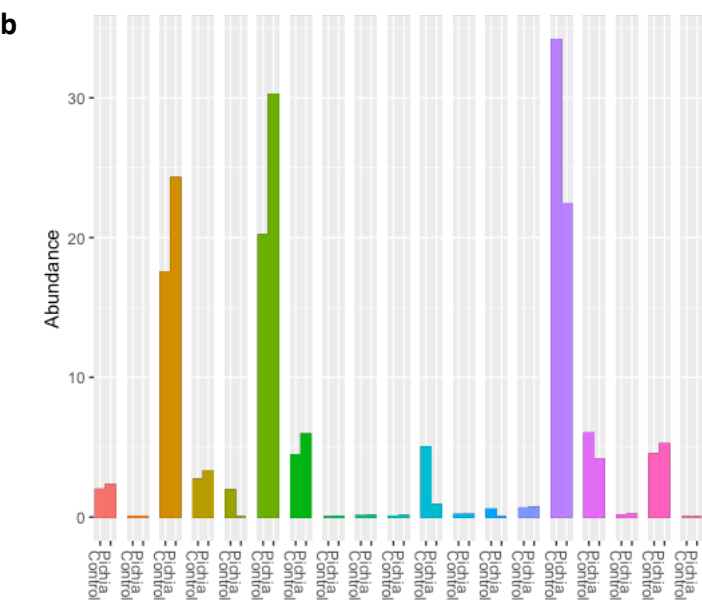

Supplement: supp [file elife-67740-supp-v1.zip]

**a**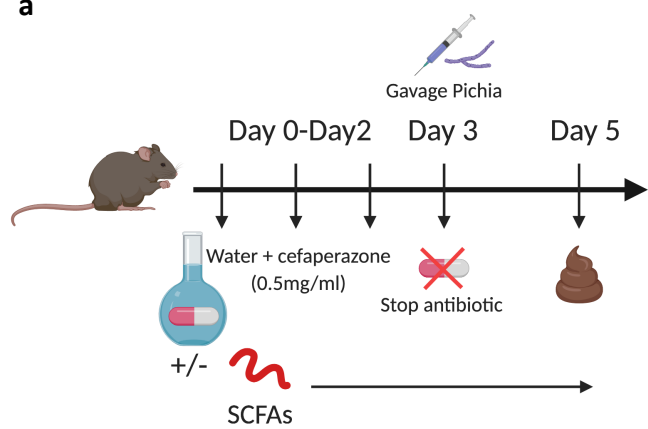**b**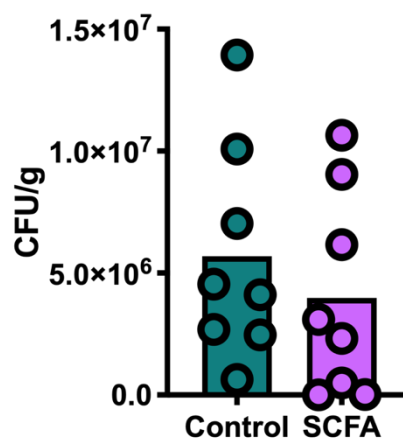

Supplement: supp [file elife-67740-supp-v1.zip]

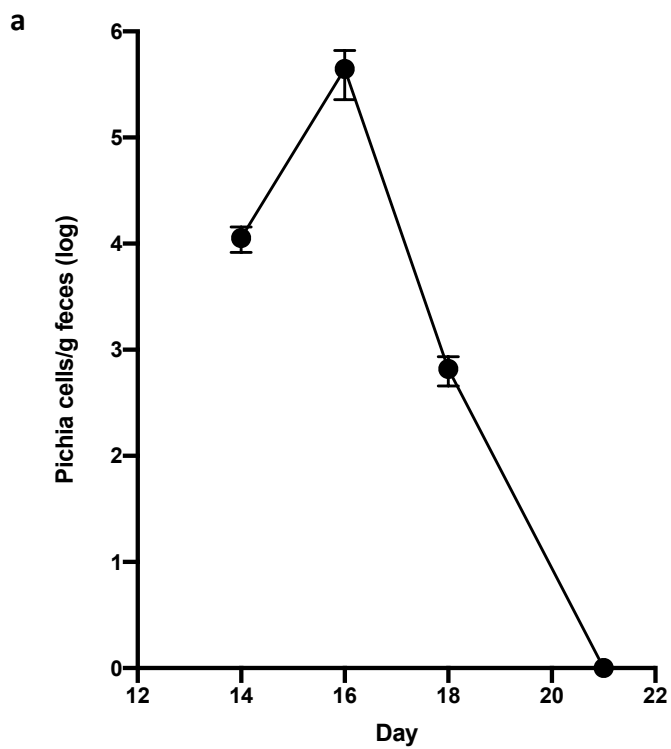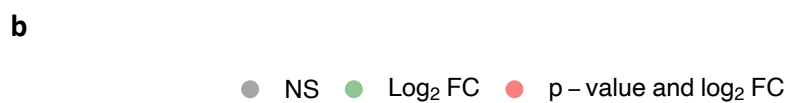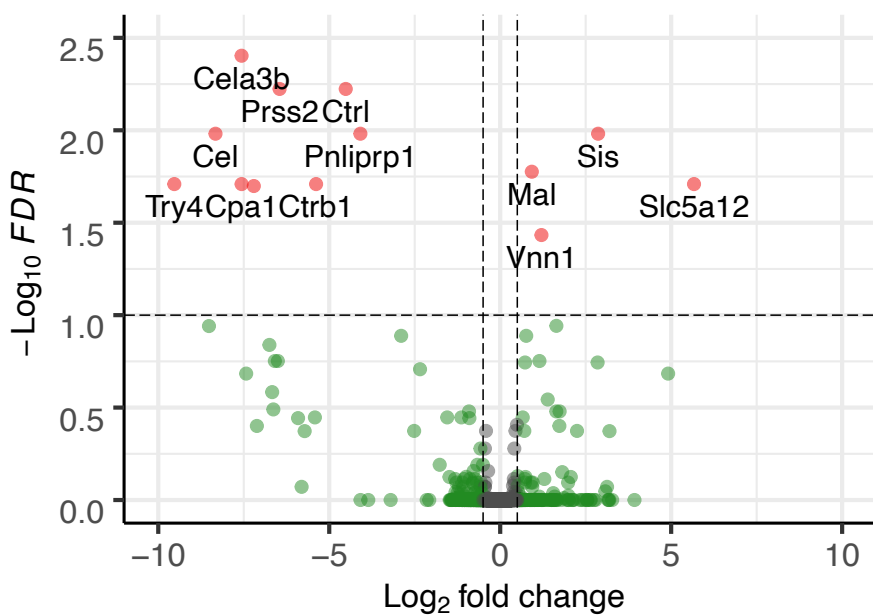

Supplement: supp [file elife-67740-supp-v1.zip]

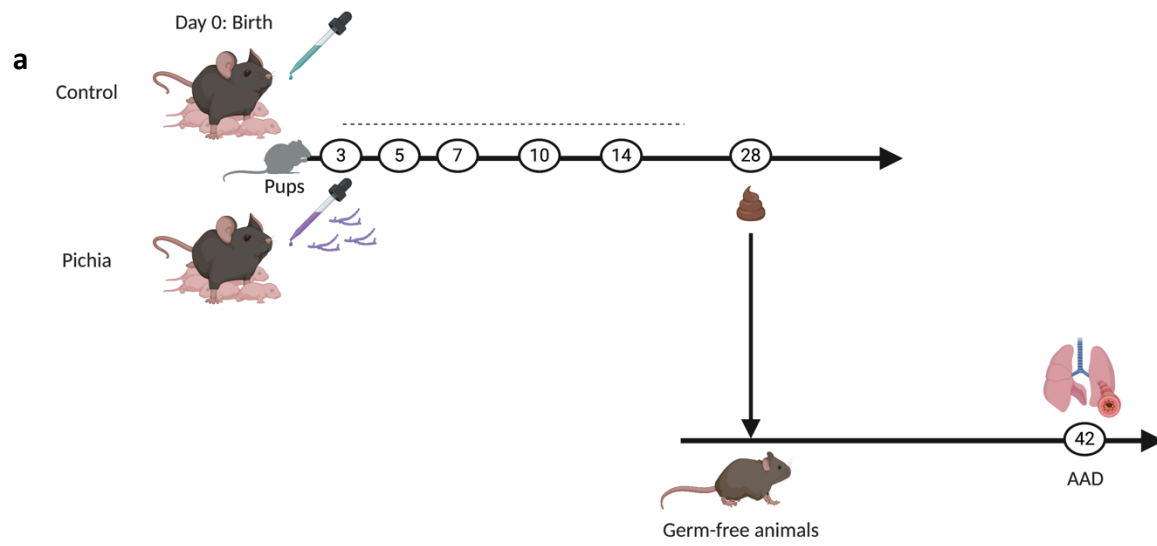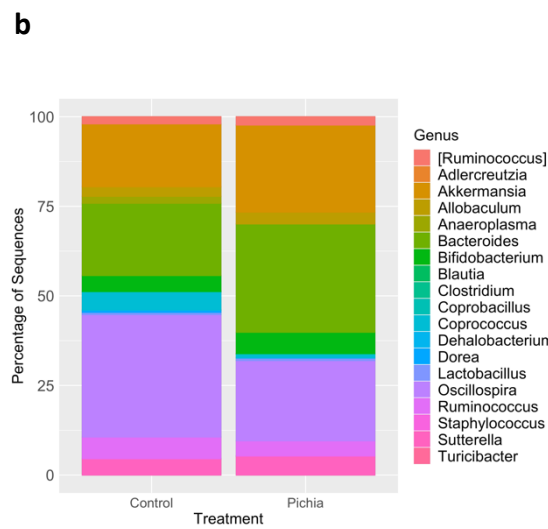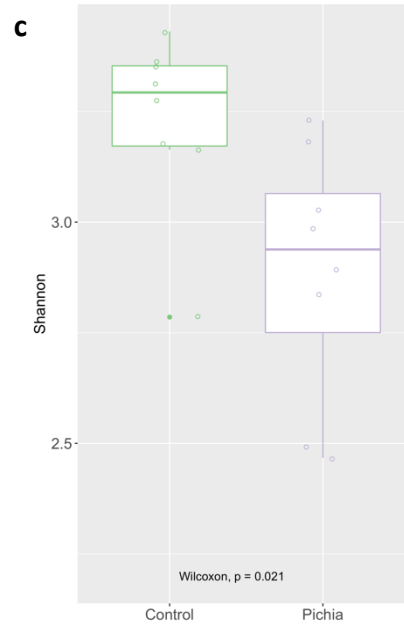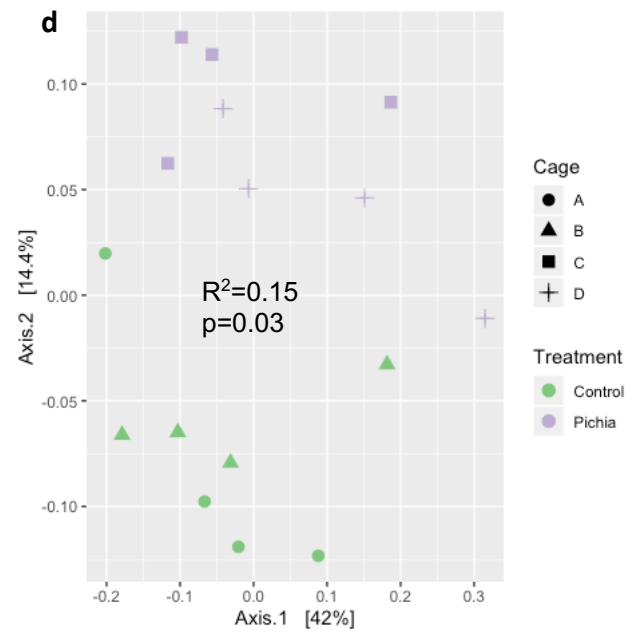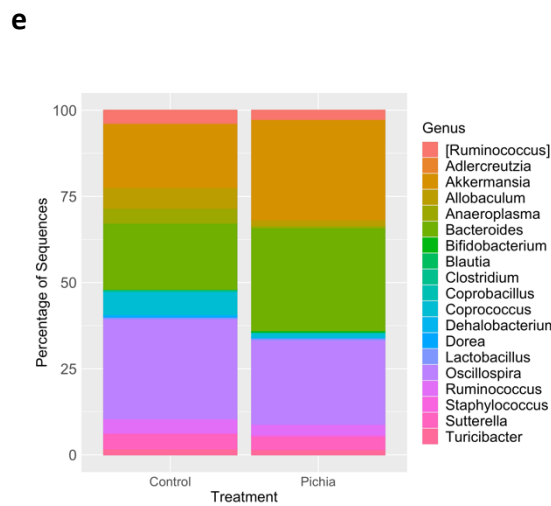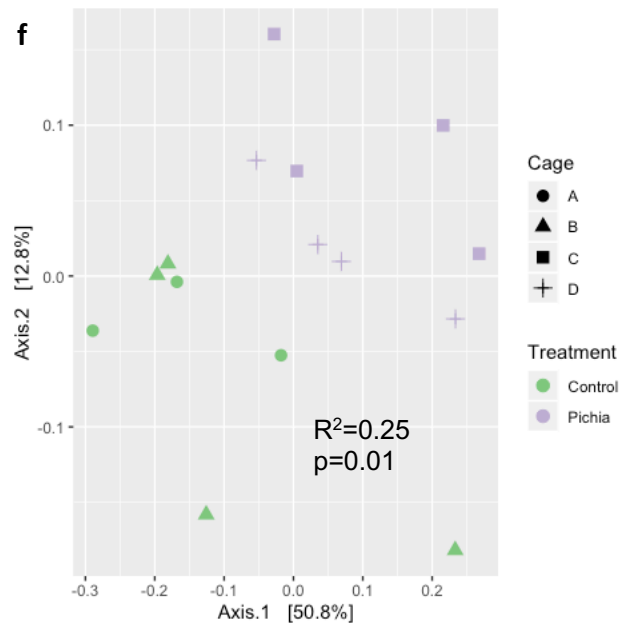

Supplement: supp [file elife-67740-supp-v1.zip]

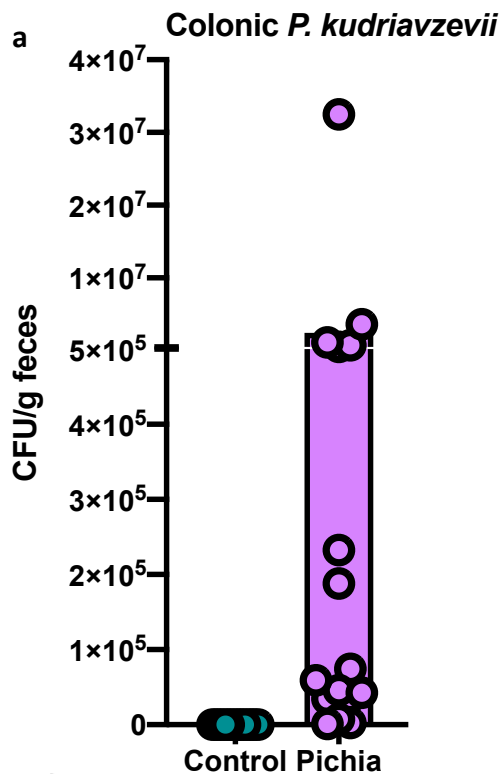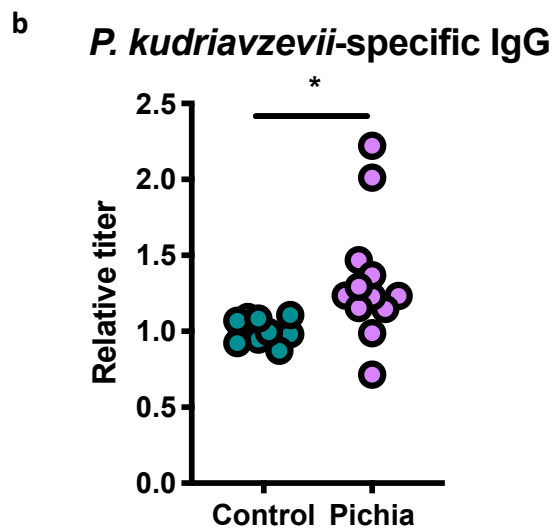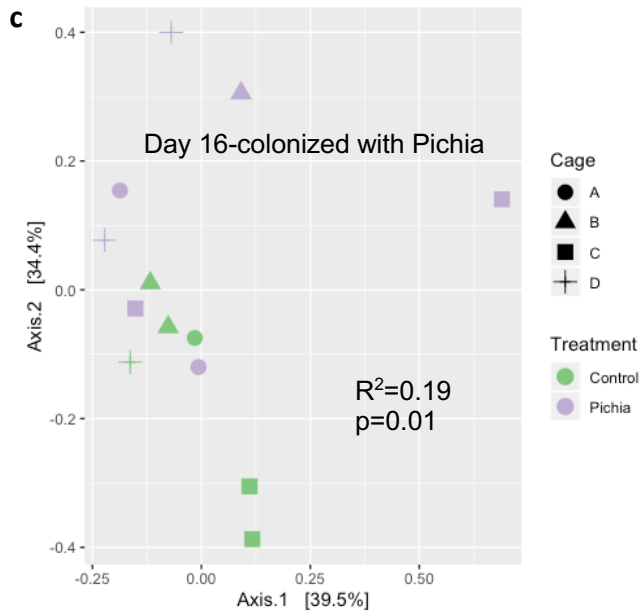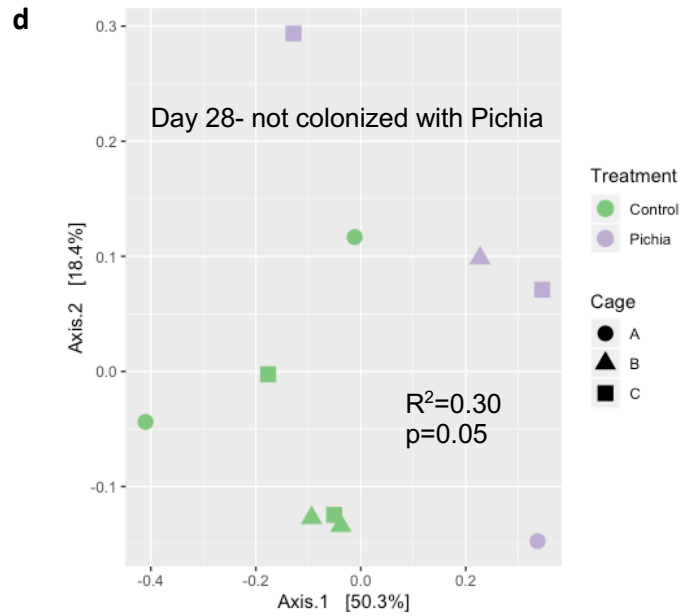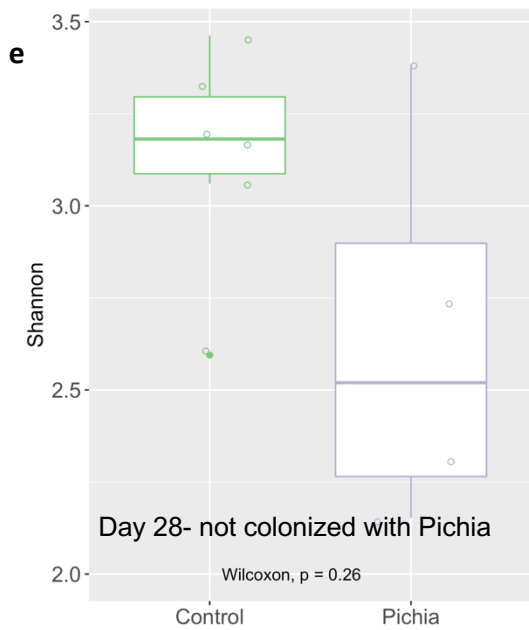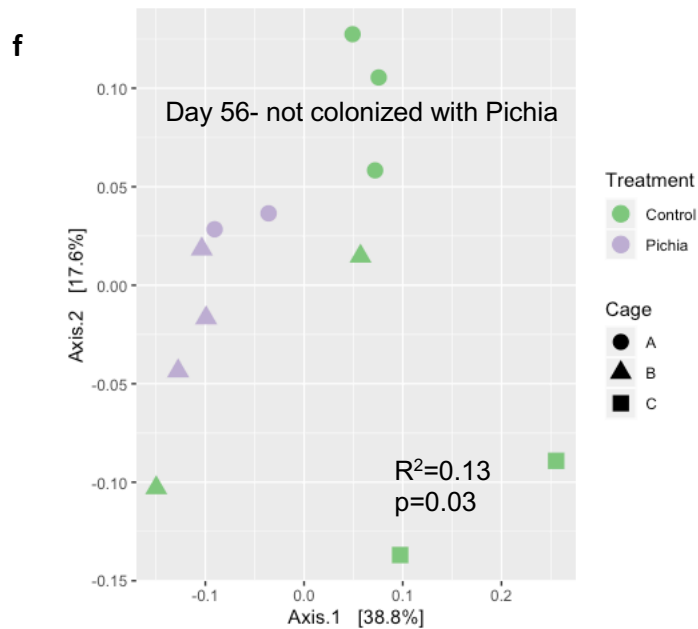

Supplement: supp [file elife-67740-supp-v1.zip]

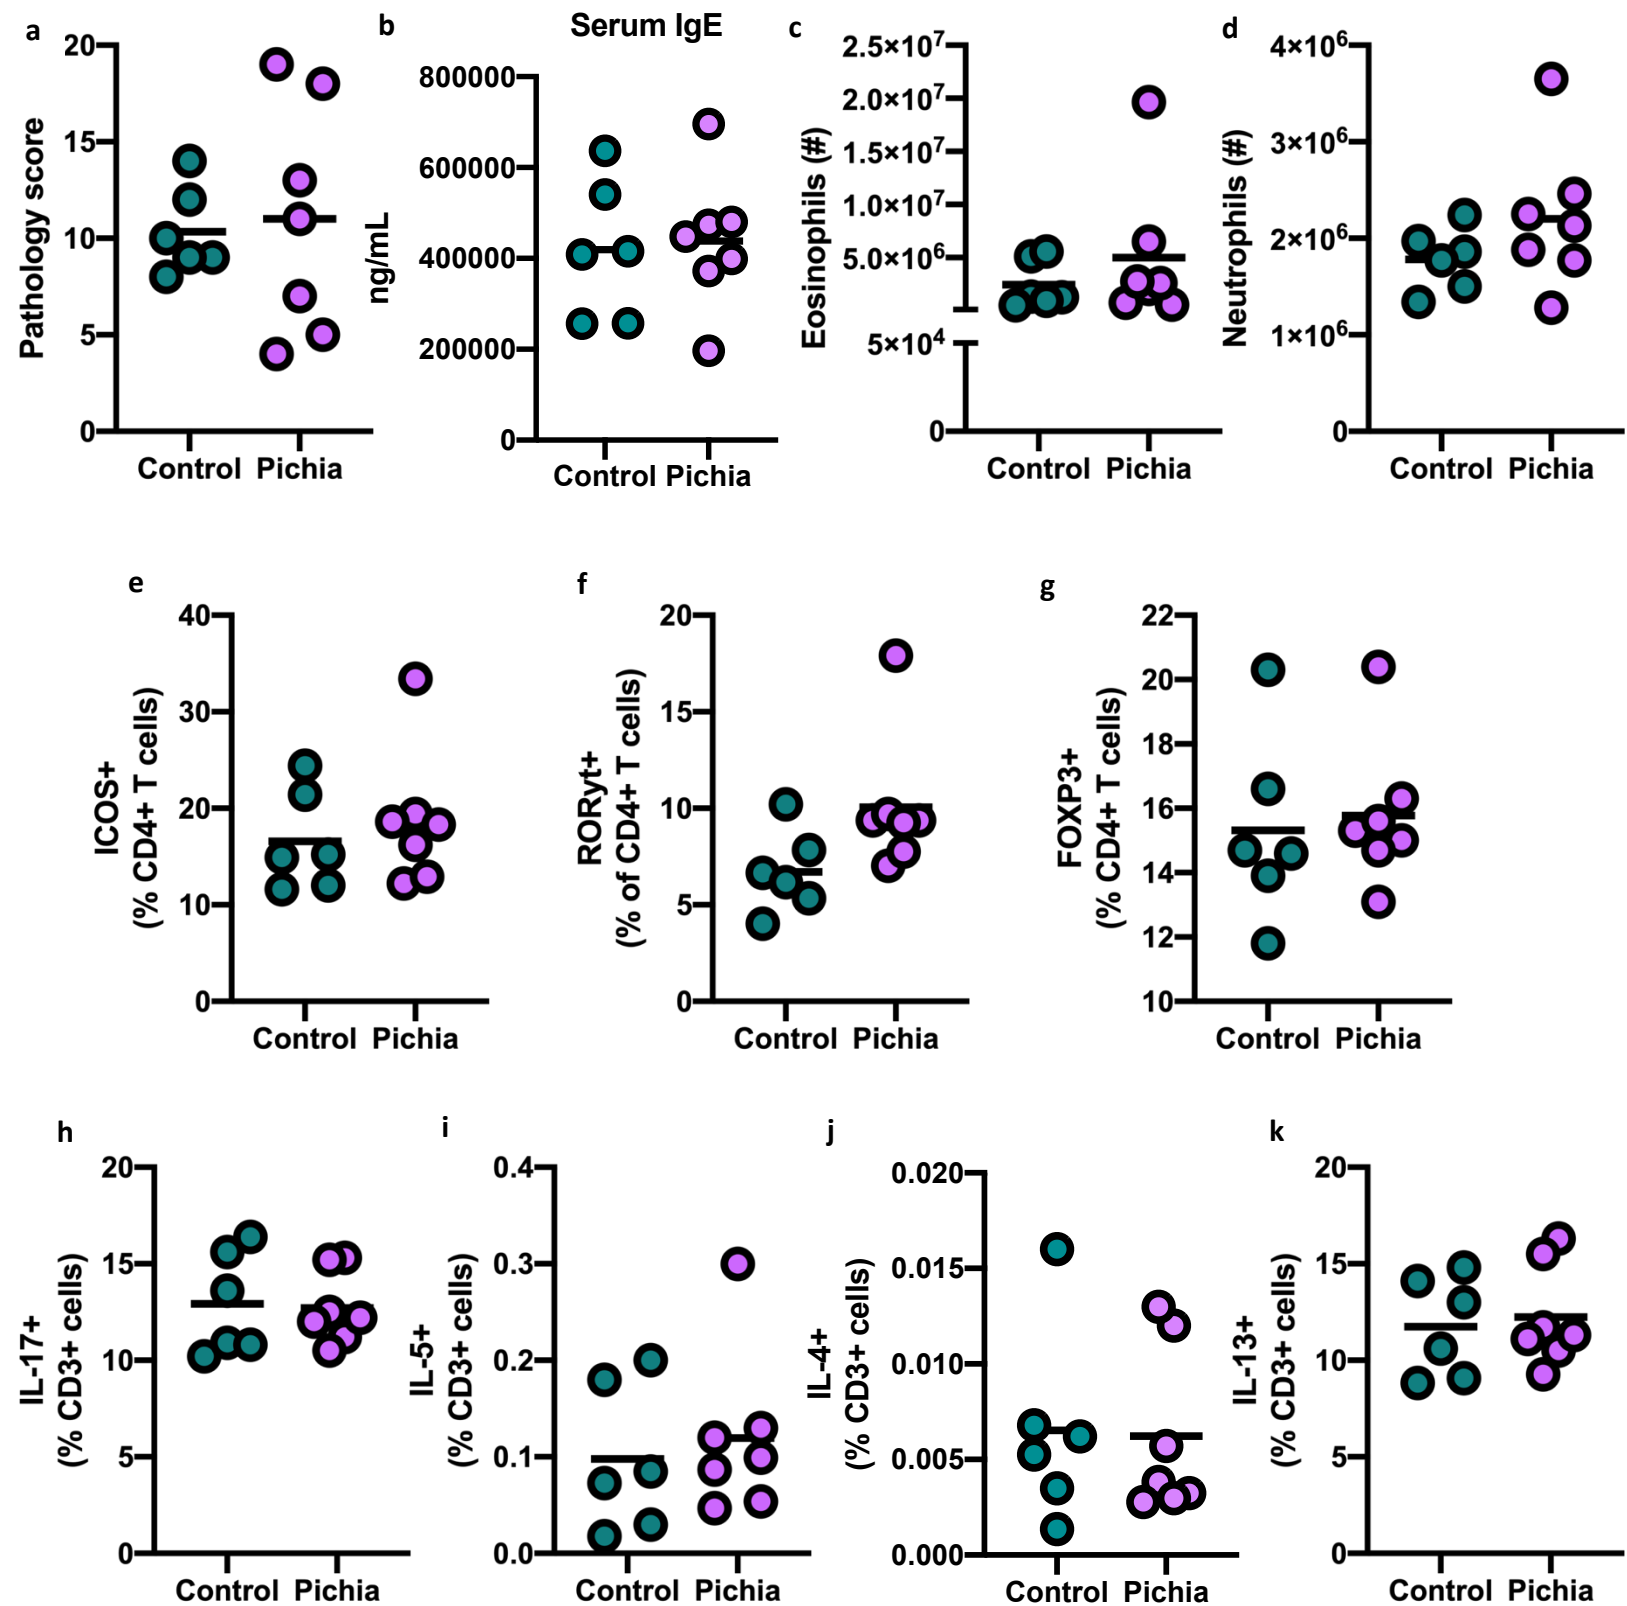

Supplement: supp [file elife-67740-supp-v1.zip]
